# Supplementary material for: Hepatitis C virus enters liver cells using the CD81 receptor complex proteins calpain-5 and CBLB
Source: PLoS Pathog. 2018 Jul 19;14(7):e1007111. doi: 10.1371/journal.ppat.1007111 (PMC6053247; doi:10.1371/journal.ppat.1007111)
Supplement: S4 Table — Protein abundances in whole cell lysates from human hepatoma cells. Listed are all detected proteins and their abundance as log2(iBAC) values. Please refer to Excel file. (XLSX) [file ppat.1007111.s013.xlsx]

## Sheet: Lunet N whole cell proteome
Gene names	Lunet N hCD81	Lunet N	Lunet N hCD81HA	Q-value	Score	Intensity	MS/MS count	Protein IDs	Majority protein IDs	Protein names
ENAH	21.6719	20.2151	17.6741	0.00099569	3.3533	123080000	2	A0A075B6E5	A0A075B6E5
ANO2	18.7433	16.5399	17.3885	0.0066718	2.2412	25104000	1	Q9NQ90;A0A075B6F1;F5GXT3;Q9NQ90-2	Q9NQ90;A0A075B6F1;F5GXT3;Q9NQ90-2	Anoctamin-2;Anoctamin
CSRP2BP	21.8773	20.4952	18.4592	0.00083236	3.3936	200640000	4	Q9H8E8;A0A075B6H4;Q9H8E8-2	Q9H8E8;A0A075B6H4;Q9H8E8-2	Cysteine-rich protein 2-binding protein
BCORL1	18.7441	18.5482	16.5922	0	5.54	47245000	3	Q5H9F3;H7C4B2;A0A075B6Q3;Q5H9F3-2;Q5H9F3-3	Q5H9F3;H7C4B2;A0A075B6Q3;Q5H9F3-2;Q5H9F3-3	BCL-6 corepressor-like protein 1
AMBRA1	18.8187	18.2639	16.9166	0.0043928	2.4369	7670000	1	Q9C0C7;H0YE34;A0A075B6T1;Q9C0C7-4;Q9C0C7-2;Q9C0C7-3;Q9C0C7-5	Q9C0C7;H0YE34;A0A075B6T1;Q9C0C7-4;Q9C0C7-2;Q9C0C7-3;Q9C0C7-5	Activating molecule in BECN1-regulated autophagy protein 1
KBTBD4	21.7117	19.3689	18.6656	0	5.8892	133590000	4	Q9NVX7;Q9NVX7-2;A0A075B6T4	Q9NVX7;Q9NVX7-2;A0A075B6T4	Kelch repeat and BTB domain-containing protein 4
PECAM1	18.5358	17.4712	18.4201	0.0072857	2.2212	15784000	1	P16284;A0A075B728;A0A075B727;A0A075B738;P16284-5;P16284-3;P16284-4;P16284-2;P16284-6	P16284;A0A075B728;A0A075B727;A0A075B738;P16284-5;P16284-3;P16284-4;P16284-2;P16284-6	Platelet endothelial cell adhesion molecule
EPPK1	23.6975	23.8069	22.5917	0	323.31	13863000000	186	A0A075B730;P58107	A0A075B730;P58107	Epiplakin
MRPS21	25.758	25.3319	22.4547	0	10.831	439410000	11	P82921;A0A075B746	P82921;A0A075B746	28S ribosomal protein S21, mitochondrial
ATAD5	17.7474	16.4391	15.078	0.0081251	2.0869	17781000	3	Q96QE3;A0A075B754;Q96QE3-2	Q96QE3;A0A075B754;Q96QE3-2	ATPase family AAA domain-containing protein 5
PEX12	21.3233	20.1565	17.2784	0.0001786	4.7956	88487000	3	O00623;A0A075B773;K7ELY8	O00623;A0A075B773;K7ELY8	Peroxisome assembly protein 12
SHANK2	22.4195	21.8581	21.011	0	47.161	1347500000	32	Q9UPX8-3;A0A075B790;A6NHU9;Q9UPX8;Q9UPX8-4;E7EUA2;H7C1X5;B7ZKU9;H0Y7S5;C9JW40;E7EX50;Q9UPX8-2;H7BZV1;C9JFP8	Q9UPX8-3;A0A075B790;A6NHU9;Q9UPX8;Q9UPX8-4;E7EUA2;H7C1X5	SH3 and multiple ankyrin repeat domains protein 2
TAF15	23.755	23.9971	23.4423	0	14.726	1895800000	17	Q92804;A0A075B7D9;Q92804-2;A0A075B7F2;A0A075B7E4	Q92804;A0A075B7D9;Q92804-2	TATA-binding protein-associated factor 2N
APBB1	20.1959	20.0742	18.3888	0	9.3608	100260000	4	O00213;A0A075B7G8;J3KPL8;O00213-2;O00213-4;O00213-6;O00213-3;O00213-5;V9GYR7;V9GY97	O00213;A0A075B7G8;J3KPL8;O00213-2;O00213-4;O00213-6;O00213-3;O00213-5	Amyloid beta A4 precursor protein-binding family B member 1
RBM47	24.5411	23.7721	22.2338	0	38.969	1237200000	27	A0AV96;A0AV96-2;D6R9D6;D6RBS9;B7Z8Z7;D6REZ6;D6R9M7;D6RBP6;D6RA49;D6RFL5;D6RCT1	A0AV96;A0AV96-2;D6R9D6;D6RBS9;B7Z8Z7;D6REZ6;D6R9M7	RNA-binding protein 47
E2F8	18.4269	18.1543	17.7219	0.00035267	4.5014	0	1	A0AVK6	A0AVK6	Transcription factor E2F8
UBA6	25.2686	25.7307	24.3911	0	202.57	8231600000	113	A0AVT1;A0AVT1-2;H0Y8S8;A0AVT1-3;A0AVT1-4;H0Y9U5	A0AVT1;A0AVT1-2	Ubiquitin-like modifier-activating enzyme 6
MED19	25.1511	24.7918	22.9045	0	29.329	941970000	10	A0JLT2;J3KR33;A0JLT2-2	A0JLT2;J3KR33;A0JLT2-2	Mediator of RNA polymerase II transcription subunit 19
UHRF1BP1L	20.7126	20.8304	21.0104	0	40.895	775850000	32	A0JNW5;A0JNW5-2;F8W1I2;F8VW65;F8W665;H0YHT7	A0JNW5	UHRF1-binding protein 1-like
KIAA1598	26.4905	26.3823	25.2289	0	222.59	10431000000	105	A0MZ66;A0MZ66-3;A0MZ66-6;A0MZ66-5;A0MZ66-4;A0MZ66-8;A0MZ66-2;A0MZ66-7	A0MZ66;A0MZ66-3;A0MZ66-6;A0MZ66-5;A0MZ66-4;A0MZ66-8;A0MZ66-2	Shootin-1
TMEM223	24.267	22.9306	22.5298	0	6.9109	500850000	7	A0PJW6	A0PJW6	Transmembrane protein 223
SLC22A23	18.866	19.514	17.9134	0.0090035	2.0269	22461000	1	A1A5C7;C9IZW5;H7C4T9;C9J4Z0;A1A5C7-3;A1A5C7-2	A1A5C7;C9IZW5;H7C4T9;C9J4Z0;A1A5C7-3;A1A5C7-2	Solute carrier family 22 member 23
MEX3A;MEX3B;MEX3C	19.8267	21.3427	18.9241	0.0047007	2.4012	122000000	4	A1L020;Q6ZN04;Q5U5Q3	A1L020;Q6ZN04;Q5U5Q3	RNA-binding protein MEX3A;RNA-binding protein MEX3B;RNA-binding E3 ubiquitin-protein ligase MEX3C
ILVBL	25.7073	25.0888	24.1406	0	159.26	3572200000	47	A1L0T0;M0R026;E9PJS0;M0R1B5;E9PL44;M0QZX5	A1L0T0;M0R026	Acetolactate synthase-like protein
PLEKHG3	19.9918	19.266	19.4972	0	13.802	154220000	4	A1L390;A1L390-3;G3V311;A1L390-2	A1L390;A1L390-3	Pleckstrin homology domain-containing family G member 3
SH3PXD2B	19.8448	18.3261	18.8405	0	6.0879	98131000	3	A1X283;G3V144	A1X283;G3V144	SH3 and PX domain-containing protein 2B
ACO2	28.3402	27.724	27.1325	0	272.09	33480000000	188	Q99798;A2A274	Q99798;A2A274	Aconitate hydratase, mitochondrial
ALG6	22.3615	23.1418	19.8683	0	5.9944	413030000	7	Q9Y672;S4R350;A2A2G4	Q9Y672;S4R350;A2A2G4	Dolichyl pyrophosphate Man9GlcNAc2 alpha-1,3-glucosyltransferase
AAR2	23.8979	24.1906	22.4735	0	30.09	878660000	22	Q9Y312;A2A2Q9	Q9Y312;A2A2Q9	Protein AAR2 homolog
PIPSL	19.0556	20.4817	20.0947	0.00035448	4.614	114290000	4	A2A3N6	A2A3N6	Putative PIP5K1A and PSMD4-like protein
TAPBP	18.83	21.0469	17.8014	0.0081276	2.09	74573000	2	O15533;D3YTI9;A2AB90;O15533-2;O15533-3;C9JA35;O15533-4	O15533;D3YTI9;A2AB90;O15533-2;O15533-3;C9JA35;O15533-4	Tapasin
MPG	23.9488	23.7429	21.1291	0	25.081	711830000	13	P29372;A2IDA3;P29372-5;P29372-4;P29372-2	P29372;A2IDA3;P29372-5;P29372-4;P29372-2	DNA-3-methyladenine glycosylase
ZNF845;ZNF320;ZNF347;ZNF253;ZNF257;ZNF195;ZNF445;ZNF534;ZNF479;ZNF480;ZNF616;ZNF506;ZNF486;ZNF286A;ZNF30;ZNF573;ZNF716;ZNF701;ZNF695;ZNF354A;ZNF595;ZNF90;ZNF333;ZNF528;ZNF141;ZNF677;ZNF732;ZNF735;ZNF354B;ZNF679;ZNF610;ZNF718;ZNF527;ZNF56;ZNF713;ZNF891;ZNF519;ZNF789;ZNF83;ZNF66;ZNF415;ZNF721;ZNF766;ZNF841;ZNF624;ZNF670;ZNF714;DKFZp313E1411;ZNF208;ZNF100	18.672	18.0486	17.2484	0.00051984	4.1481	47643000	3	Q96IR2;A2RRD8;M0R1K6;M0QZA2;M0R2Z6;M0R2L4;M0R2N3;M0QX96;Q96SE7;O75346;Q9Y2Q1;O14628;P59923;Q76KX8;Q96JC4;Q8WV37;Q08AN1;Q5JVG8;Q96H40;Q9HBT8;P17039;Q86YE8;A6NP11;Q9NV72;Q8IW36;O60765;Q8IYB9;Q03938;Q96JL9;Q3MIS6;Q15928;Q86XU0;B4DXR9;P0CB33;Q96LW1;Q8IYX0;Q8N9Z0;Q3SXZ3;Q8NB42;Q15929;Q8N859;A8MT65;Q8TB69;Q9H7R5-2;Q6ZN19-3;Q5FWF6;M0R0Z8;K7ERG6;M0R099;M0R1T0;F8WEN0;C9JUE3;C9J3R7;I3L137;K7ENX6;M0R1N1;E5R…	Q96IR2;A2RRD8;M0R1K6;M0QZA2;M0R2Z6;M0R2L4;M0R2N3;M0QX96;Q96SE7;O75346;Q9Y2Q1;O14628;P59923;Q76KX8;Q96JC4;Q8WV37;Q08AN1;Q5JVG8;Q96H40;Q9HBT8;P17039;Q86YE8;A6NP11;Q9NV72;Q8IW36;O60765;Q8IYB9;Q03938;Q96JL9;Q3MIS6;Q15928;Q86XU0;B4DXR9;P0CB33;Q96LW1;Q8IYX0;Q8N9Z0;Q3SXZ3;Q8NB42;Q15929;Q8N859;A8MT65;Q8TB69;Q9H7R5-2;Q6ZN19-3;Q5FWF6;M0R0Z8;K7ERG6;M0R099;M0R1T0;F8WEN0;C9JUE3;C9J3R7;I3L137;K7ENX6;M0R1N1;E5R…	Zinc finger protein 845;Zinc finger protein 320;Zinc finger protein 347;Zinc finger protein 253;Zinc finger protein 257;Zinc finger protein 195;Zinc finger protein 445;Zinc finger protein 534;Zinc finger protein 479;Zinc finger protein 480;Zinc finger protein 616;Zinc finger protein 506;Zinc finger protein 486;Zinc finger protein 286A;Zinc finger protein 30;Zinc finger protein 573;Zinc finger pro…
NBAS	22.8104	22.3226	21.3285	0	91.744	2155200000	42	A2RRP1;A2RRP1-2;H0Y5G7;H7BZU5;H7C007;C9JCM7;H7C1U4;H7C1Y9;H7BZR3	A2RRP1;A2RRP1-2;H0Y5G7	Neuroblastoma-amplified sequence
SRGAP2	20.5255	20.996	21.2172	0	18.795	423520000	11	O75044;A2RUF3;A0A075B7B5;Q5VZB4;P0DJJ0;P0DMP2;A0A075B7E9;A0A075B743	O75044;A2RUF3;A0A075B7B5	SLIT-ROBO Rho GTPase-activating protein 2
KLF5	20.5135	18.5958	17.6855	0	5.836	40194000	1	Q13887;Q13887-2;A2TJX0	Q13887;Q13887-2;A2TJX0	Krueppel-like factor 5
KIAA0922	17.172	18.7864	18.3209	0	5.463	55695000	4	A2VDJ0;H0Y2M0;A2VDJ0-2;A2VDJ0-3;A2VDJ0-5	A2VDJ0;H0Y2M0;A2VDJ0-2;A2VDJ0-3;A2VDJ0-5	Transmembrane protein 131-like
VWA8	23.7556	23.1053	22.0611	0	118.87	3708100000	68	A3KMH1;A3KMH1-3;A3KMH1-2	A3KMH1;A3KMH1-3;A3KMH1-2	von Willebrand factor A domain-containing protein 8
SBNO1	21.5565	21.819	20.3041	0	46.24	676120000	19	A3KN83;A3KN83-3;A3KN83-2;A3KN83-4;Q9Y2G9;K7ES28;Q9Y2G9-3	A3KN83;A3KN83-3;A3KN83-2;A3KN83-4	Protein strawberry notch homolog 1
GTPBP10	24.6342	24.3229	22.8032	0	42.25	1764200000	35	A4D1E9;A4D1E9-2;C9J8R7;C9JNI1;C9JEQ8;F8WBY0;F8WCN4;F8WBB5;A4D1E9-3	A4D1E9;A4D1E9-2;C9J8R7;C9JNI1	GTP-binding protein 10
WDR91	20.8509	21.4799	19.1535	0	16.139	287860000	13	A4D1P6;C9J1X0;A4D1P6-2;A4D1P6-3	A4D1P6;C9J1X0;A4D1P6-2;A4D1P6-3	WD repeat-containing protein 91
KAT6A;MYST3	18.6172	18.5595	17.983	0.00017979	4.9495	29754000	1	Q92794;C9K0F9;A5PLL3	Q92794;C9K0F9;A5PLL3	Histone acetyltransferase KAT6A;Histone acetyltransferase
TRAPPC13	19.1245	19.8199	19.4318	0.00066968	3.505	45556000	3	A5PLN9;A5PLN9-7;A5PLN9-2;A5PLN9-4;A5PLN9-5	A5PLN9;A5PLN9-7;A5PLN9-2;A5PLN9-4;A5PLN9-5	Trafficking protein particle complex subunit 13
CNOT1	25.1126	25.2372	24.0424	0	323.31	14156000000	187	A5YKK6;A5YKK6-2;A5YKK6-3;A5YKK6-4;B5MDN3;H3BMZ2;H3BVC9;H3BNB1;H3BT18;H3BU44;H3BMH0;H3BTH2;H3BR89;H3BPF1	A5YKK6;A5YKK6-2;A5YKK6-3;A5YKK6-4;B5MDN3	CCR4-NOT transcription complex subunit 1
MAP1LC3B;MAP1LC3B2;MAP1LC3A	26.3093	26.3176	25.0554	0.00099371	3.3009	1308600000	5	Q9GZQ8;A6NCE7;H3BTL1;Q9H492;Q9H492-2	Q9GZQ8;A6NCE7;H3BTL1;Q9H492;Q9H492-2	Microtubule-associated proteins 1A/1B light chain 3B;Microtubule-associated proteins 1A/1B light chain 3 beta 2;Microtubule-associated proteins 1A/1B light chain 3A
C2orf72	23.6051	23.2294	21.6927	0	29.89	591380000	15	A6NCS6	A6NCS6	Uncharacterized protein C2orf72
FAM83G	22.9649	21.915	20.9254	0	16.624	696730000	13	A6ND36;A6ND36-2	A6ND36;A6ND36-2	Protein FAM83G
PGP	25.9206	26.101	24.6577	0	45.462	3539500000	40	A6NDG6;H3BV17	A6NDG6	Phosphoglycolate phosphatase
C5orf51	21.1505	24.001	22.468	0	16.518	472360000	10	A6NDU8	A6NDU8	UPF0600 protein C5orf51
GOLGA6L10;GOLGA6L4;GOLGA6L19;GOLGA6L3;GOLGA6L18;PRR7;GOLGA6L9	24.5249	23.4364	19.0539	0.0054475	2.2863	1156900000	4	A6NI86;A6NEF3;H0YKK7;A6NEY3;J3KQ80;D6RB28;Q8TB68;A6NEM1;D6RFJ4;A6NEM1-2;Q8TB68-2;A6NFL8	A6NI86;A6NEF3;H0YKK7;A6NEY3;J3KQ80;D6RB28;Q8TB68;A6NEM1;D6RFJ4;A6NEM1-2;Q8TB68-2;A6NFL8	Putative golgin subfamily A member 6-like protein 10;Putative golgin subfamily A member 6-like protein 4;Putative golgin subfamily A member 6-like protein 19;Putative golgin subfamily A member 6-like protein 3;Putative golgin subfamily A member 6-like protein 18;Proline-rich protein 7;Golgin subfamily A member 6-like protein 9
HMGN1	27.2457	25.8617	26.1427	0	9.5482	1552400000	8	P05114;A6NEL0;A6NL93;F2Z2W6;F2Z2Y5;H7BXJ5	P05114;A6NEL0;A6NL93	Non-histone chromosomal protein HMG-14
ZNF316	19.1742	19.2331	18.253	0	5.6514	78108000	2	A6NFI3	A6NFI3	Zinc finger protein 316
2008-09-01	22.9999	22.0559	21.9715	0	14.008	460720000	9	Q92599;Q92599-4;A6NMH6;A6NFQ9;F8W8I8;Q92599-2;Q92599-3;C9JV02;C9J4G8	Q92599;Q92599-4;A6NMH6;A6NFQ9;F8W8I8;Q92599-2;Q92599-3	Septin-8
WBP2	22.1209	23.1421	23.3347	0.00017825	4.7516	254020000	1	Q969T9;K7EIJ0;K7ENL2;A6NG10;K7EMC9;K7EIN1;K7ESN4;K7EIK1;B4DFG2	Q969T9;K7EIJ0;K7ENL2;A6NG10;K7EMC9;K7EIN1;K7ESN4;K7EIK1;B4DFG2	WW domain-binding protein 2
UBE2J2	22.2397	22.2624	21.8116	0.00034928	4.292	176680000	4	Q8N2K1-3;Q8N2K1;D6RD90;B1AMF0;A6NGS0;Q8N2K1-2	Q8N2K1-3;Q8N2K1;D6RD90;B1AMF0;A6NGS0;Q8N2K1-2	Ubiquitin-conjugating enzyme E2 J2
GGT2;GGT1;GGT3P	21.1707	19.3312	19.1969	0	5.8281	162300000	3	P36268;P19440;B5MCK8;P36268-2;A6NGU5;P36268-3;E7ET76;Q14390;E7ETR7;B5MC36;B5MC34;P19440-3;B5MD39;P19440-2	P36268;P19440;B5MCK8;P36268-2;A6NGU5;P36268-3;E7ET76	Inactive gamma-glutamyltranspeptidase 2;Gamma-glutamyltranspeptidase 1;Gamma-glutamyltranspeptidase 1 heavy chain;Gamma-glutamyltranspeptidase 1 light chain;Putative gamma-glutamyltranspeptidase 3;Putative gamma-glutamyltranspeptidase 3 heavy chain;Putative gamma-glutamyltranspeptidase 3 light chain
YIF1A	26.218	25.2207	24.2967	0	17.868	1356300000	13	O95070;A6NGW1;E9PIZ0;C9JST7;E9PS11	O95070;A6NGW1;E9PIZ0;C9JST7	Protein YIF1A
POLR3GL	20.8679	21.292	16.4959	0.00083528	3.4699	48352000	2	Q9BT43;A6NGX6	Q9BT43;A6NGX6	DNA-directed RNA polymerase III subunit RPC7-like
GLTPD2	25.0629	24.1923	23.5733	0	22.098	1362500000	21	A6NH11	A6NH11	Glycolipid transfer protein domain-containing protein 2
ZMYM3	23.7027	23.0916	22.3432	0	191.62	2054700000	43	Q14202;A6NHB5;Q14202-2;A6NHN7;A6NL54;Q14202-3;A6NC58	Q14202;A6NHB5;Q14202-2;A6NHN7	Zinc finger MYM-type protein 3
TUBAL3	19.7733	20.1277	19.5349	0.0037855	2.5102	87135000	3	A6NHL2;A6NHL2-2	A6NHL2;A6NHL2-2	Tubulin alpha chain-like 3
RC3H1;RC3H2	17.114	19.2681	17.6939	0.00098863	3.211	80346000	0	Q5TC82;Q9HBD1;A6NHN2;Q4VXB0;Q9HBD1-2;Q9HBD1-3;Q9HBD1-6;Q9HBD1-4;Q5TC82-2	Q5TC82;Q9HBD1;A6NHN2;Q4VXB0;Q9HBD1-2;Q9HBD1-3;Q9HBD1-6;Q9HBD1-4;Q5TC82-2	Roquin-1;Roquin-2
FBLL1	25.0757	23.9074	23.108	0.000178	4.7107	1370000000	10	A6NHQ2;R4GMW7	A6NHQ2;R4GMW7	rRNA/tRNA 2-O-methyltransferase fibrillarin-like protein 1
SMCHD1	25.2187	24.6558	24.2523	0	323.31	11966000000	169	A6NHR9;A6NHR9-2;J3KTL8;A6NHR9-3;J3QSH1;J3KRK8;J3KTK7	A6NHR9;A6NHR9-2;J3KTL8	Structural maintenance of chromosomes flexible hinge domain-containing protein 1
HMX3	17.6521	19.5179	16.9293	0.00018192	5.1832	12762000	1	A6NHT5	A6NHT5	Homeobox protein HMX3
GATSL2;GATSL1	23.0317	21.5299	21.7828	0	10.62	283410000	7	A6NHX0;A6NNH0;Q8WTX7;F2Z3I9;F2Z2C1;F8WD52;B7WPJ3	A6NHX0;A6NNH0	GATS-like protein 2;GATS-like protein 1
UNC119B	24.1095	23.4026	21.1682	0	28.346	515810000	10	A6NIH7;Q13432;K7EJU3;K7EN86;C9JSK0;Q13432-2	A6NIH7	Protein unc-119 homolog B
METTL15	23.5179	22.8767	21.3227	0	27.659	509490000	11	A6NJ78;A6NJ78-2;A6NJ78-4;P0C7V9;B5MC64;F8WD83;A6NJ78-3	A6NJ78	Probable methyltransferase-like protein 15
CCDC85C	18.0812	21.2341	19.7328	0.00067431	3.6056	89969000	3	A6NKD9;G3V4C8;H0YJY5;H0YJE0	A6NKD9;G3V4C8;H0YJY5;H0YJE0	Coiled-coil domain-containing protein 85C
RGPD3	19.0455	21.2435	20.2581	0.00051387	3.919	359520000	2	A6NKT7;J3KNE0;C9J6W1;Q7Z3J3-2;H0YBN8;C9J1W9;C9JF75;H7BZ48	A6NKT7;J3KNE0	RanBP2-like and GRIP domain-containing protein 3
CNIH4	26.6068	18.8557	25.1388	0	7.9733	350390000	3	A6NLH6;Q9P003	A6NLH6;Q9P003	Protein cornichon homolog 4
WDR45	18.0759	21.7116	17.9032	0.00034734	4.1835	61817000	2	Q9Y484;A6NM71;C9JYH8;G8JLI5;Q9Y484-3;Q9Y484-2;C9J7Q8;H7C4N7;C9JVT3;C9J5L0;C9JE01;C9J0A8;C9JUS5;C9JBX7;C9J471;H0Y329	Q9Y484;A6NM71;C9JYH8;G8JLI5;Q9Y484-3;Q9Y484-2;C9J7Q8;H7C4N7;C9JVT3;C9J5L0;C9JE01;C9J0A8;C9JUS5;C9JBX7;C9J471;H0Y329	WD repeat domain phosphoinositide-interacting protein 4
CRYZL1	22.7863	21.8401	21.2235	0	6.5481	346440000	6	O95825;A6NMA8;C9JAL0;F8WF64;C9JZK8;A6NND8;A6NHJ8;O95825-2	O95825;A6NMA8	Quinone oxidoreductase-like protein 1
CD81	25.5048	17.3754	24.5036	0	116.77	571180000	12	P60033;E9PJK1;E9PRJ8;H0YDL9;H0YDJ9;E9PIF1;A6NMH8;E9PM31;H0YEE2	P60033;E9PJK1;E9PRJ8;H0YDL9;H0YDJ9;E9PIF1;A6NMH8	CD81 antigen;Tetraspanin
POLA1	23.8583	22.5782	21.4827	0	71.761	2200900000	40	P09884;A6NMQ1	P09884;A6NMQ1	DNA polymerase alpha catalytic subunit;DNA polymerase
ENSA	25.994	26.7914	25.4882	0	24.081	2552700000	23	O43768;O43768-3;A6NMQ3;Q5T5H1;O43768-6;O43768-5;O43768-2;O43768-9;O43768-7;O43768-4;O43768-8	O43768;O43768-3;A6NMQ3;Q5T5H1;O43768-6;O43768-5;O43768-2;O43768-9;O43768-7;O43768-4;O43768-8	Alpha-endosulfine
SHROOM1	20.5632	21.3271	18.7619	0	9.6958	195840000	5	Q2M3G4;A6NN40;Q2M3G4-2;C9JXU1	Q2M3G4;A6NN40;Q2M3G4-2;C9JXU1	Protein Shroom1
AMD1	20.3526	17.8068	16.9239	0.0077089	2.1528	37288000	4	P17707;Q5VXN5;A6NNH3;B4DZ60;P17707-2	P17707;Q5VXN5;A6NNH3;B4DZ60;P17707-2	S-adenosylmethionine decarboxylase proenzyme;S-adenosylmethionine decarboxylase alpha chain;S-adenosylmethionine decarboxylase beta chain
CD9	18.523	18.7762	17.3755	0	9.2897	4001000000	8	P21926;A6NNI4;G8JLH6;F5GXT1	P21926;A6NNI4;G8JLH6	CD9 antigen;Tetraspanin
AMOT	21.894	19.9748	21.4243	0.0075594	2.1594	786170000	4	Q4VCS5;A6NP16;E7ERM3;Q4VCS5-2	Q4VCS5;A6NP16;E7ERM3;Q4VCS5-2	Angiomotin
PPP2R4;DKFZp781M17165	25.7239	26.5547	25.4097	0	51.854	4013900000	31	Q15257;A6PVN5;Q15257-2;Q15257-3;B4DZF8;Q15257-4;Q5T949;Q5T948;A6PVN9;Q68CR8;A6PVN6;B7ZBQ0;A6PVN8;A6PVN7;C9IZ76;B7ZBP9;B7ZBP7;B4DDQ6;H0Y6E5	Q15257;A6PVN5;Q15257-2;Q15257-3;B4DZF8;Q15257-4;Q5T949;Q5T948;A6PVN9;Q68CR8;A6PVN6	Serine/threonine-protein phosphatase 2A activator
PIP5K1A	22.2784	21.5927	18.4837	0	6.5021	225750000	4	Q99755;Q99755-2;A6PW57;Q99755-3;Q99755-4	Q99755;Q99755-2;A6PW57;Q99755-3;Q99755-4	Phosphatidylinositol 4-phosphate 5-kinase type-1 alpha
CRELD2	24.7639	24.1351	22.7832	0	11.647	1023400000	12	Q6UXH1;Q6UXH1-5;A6PWM2;Q6UXH1-3;Q6UXH1-2;Q6UXH1-4;Q6UXH1-6	Q6UXH1;Q6UXH1-5;A6PWM2;Q6UXH1-3;Q6UXH1-2;Q6UXH1-4;Q6UXH1-6	Cysteine-rich with EGF-like domain protein 2
FAM127A;FAM127C;FAM127B	22.601	23.5587	22.9385	0.0005202	4.1568	246410000	4	A6ZKI3;Q17RB0;Q9BWD3	A6ZKI3;Q17RB0;Q9BWD3	Protein FAM127A;Protein FAM127C;Protein FAM127B
GOLGA8A;GOLGA8B	20.0434	19.5144	18.911	0	33.064	36925000	2	A7E2F4;A8MQT2;J3KQL3;C9J1B5;A8MQT2-2;A7E2F4-3	A7E2F4;A8MQT2;J3KQL3;C9J1B5;A8MQT2-2;A7E2F4-3	Golgin subfamily A member 8A;Golgin subfamily A member 8B
ZSWIM8	17.6246	16.3032	16.8209	0.00035149	4.4124	36914000	4	A7E2V4;H7BZ52;S4R3H3;S4R393;S4R410;A7E2V4-5;A7E2V4-3;A7E2V4-4;A7E2V4-2;H0YCW2;S4R3B3;H7C453;S4R3U7	A7E2V4;H7BZ52;S4R3H3;S4R393;S4R410;A7E2V4-5;A7E2V4-3;A7E2V4-4;A7E2V4-2;H0YCW2;S4R3B3;H7C453;S4R3U7	Zinc finger SWIM domain-containing protein 8
POM121C	22.1297	21.0425	20.6401	0	18.891	404340000	11	A8CG34;A8CG34-2;A0A075B7F8;A6NF01;Q6PJE2;C9JER0;C9J370;Q6PJE2-5	A8CG34;A8CG34-2;A0A075B7F8	Nuclear envelope pore membrane protein POM 121C
ZYG11B	19.621	18.2119	16.8226	0	7.5593	71847000	3	Q9C0D3;A8DPD7	Q9C0D3;A8DPD7	Protein zyg-11 homolog B
DDX11;DDX11L8;DDX12P	18.9027	18.3107	17.9131	0.00051867	4.1049	55982000	3	Q96FC9;A8MPP1;Q92771;Q96FC9-2;Q96FC9-4;Q96FC9-3	Q96FC9;A8MPP1;Q92771;Q96FC9-2;Q96FC9-4;Q96FC9-3	Probable ATP-dependent RNA helicase DDX11;Putative ATP-dependent RNA helicase DDX11-like protein 8;Putative ATP-dependent RNA helicase DDX12
MLLT4	25.5807	25.6583	24.5128	0	216.79	15501000000	174	P55196;A8MQ02;P55196-5;J3KN01;Q5TIG5;P55196-6;H0Y8L4;H0Y948;H0Y8U8;H0Y9I0;H0YA98	P55196;A8MQ02;P55196-5;J3KN01;Q5TIG5;P55196-6	Afadin
RTFDC1	23.308	23.7093	20.2322	0	13.793	519860000	10	Q9BY42;A8MSH5;A2A2L5;A2A2L6	Q9BY42;A8MSH5;A2A2L5	Protein RTF2 homolog
CEP78	22.9761	22.2264	21.6935	0	16.988	551930000	10	Q5JTW2;A8MST6;Q5JTW2-5;Q5JTW2-2;Q5JTW2-3	Q5JTW2;A8MST6;Q5JTW2-5;Q5JTW2-2;Q5JTW2-3	Centrosomal protein of 78 kDa
POT1	19.1321	17.8014	17.088	0.0014703	3.0792	16088000	2	Q9NUX5;H7C0Z6;H7C4C7;A8MTK3	Q9NUX5;H7C0Z6;H7C4C7;A8MTK3	Protection of telomeres protein 1
ZNF724P	20.1421	18.7177	19.9778	0.00017924	4.8903	122420000	3	A8MTY0	A8MTY0	Putative zinc finger protein 724
DSCR3	17.9739	18.2509	16.5973	0.0034926	2.6281	0	2	O14972;A8MTY9;O14972-2	O14972;A8MTY9;O14972-2	Down syndrome critical region protein 3
TMEM147	18.2383	19.7795	17.7165	0	61.58	0	1	Q9BVK8;A8MU21;Q9BVK8-2	Q9BVK8;A8MU21;Q9BVK8-2	Transmembrane protein 147
SUMO3	25.7696	26.3461	26.0769	0.0019414	2.9484	552780000	2	P55854;A8MUA9;A8MU27;P55854-2	P55854;A8MUA9;A8MU27;P55854-2	Small ubiquitin-related modifier 3
TSSC1	17.7525	17.6989	20.5875	0.0034932	2.6301	23634000	2	Q53HC9;A8MUM1;F8WDX0;F8WB12;F8WDS8;C9J0U9;D3YTH5	Q53HC9;A8MUM1;F8WDX0;F8WB12;F8WDS8;C9J0U9;D3YTH5	Protein TSSC1
RPL23A	31.8029	31.2109	30.7672	0	38.161	60379000000	68	P62750;H7BY10;K7EJV9;K7ERT8;A8MUS3;K7EMA7	P62750;H7BY10;K7EJV9;K7ERT8;A8MUS3;K7EMA7	60S ribosomal protein L23a
SNRPG;SNRPGP15	29.9177	29.649	29.0179	0	13.474	8669300000	23	P62308;A8MWD9;Q49AN9;F5H013;C9JVQ0	P62308;A8MWD9;Q49AN9;F5H013;C9JVQ0	Small nuclear ribonucleoprotein G;Putative small nuclear ribonucleoprotein G-like protein 15
LRRFIP2	23.9015	24.4714	22.4737	0	30.264	2013400000	31	Q9Y608;Q9Y608-2;Q9Y608-4;A8MXR0;C9JSU1;H7C3N9;Q9Y608-3;C9JJC9;C9JC17;C9J321;C9J0U5	Q9Y608;Q9Y608-2;Q9Y608-4;A8MXR0;C9JSU1	Leucine-rich repeat flightless-interacting protein 2
NUDT19	23.2747	22.0232	21.0676	0	19.887	395770000	12	A8MXV4	A8MXV4	Nucleoside diphosphate-linked moiety X motif 19, mitochondrial
GPRC5C	23.6604	23.0846	20.5165	0	9.9955	456010000	8	Q9NQ84;A8MXZ4;Q9NQ84-2;J9JIE0	Q9NQ84;A8MXZ4;Q9NQ84-2;J9JIE0	G-protein coupled receptor family C group 5 member C
RAB34	25.1255	24.3122	23.4709	0	20.565	1381600000	16	Q9BZG1;A8MYQ9;C9JBG0;C9JY26;E7ES60;Q9BZG1-4;Q9BZG1-2;K7EIF2;H7C0Y7;V9GY61;K7EJW7;J3QLC6	Q9BZG1;A8MYQ9;C9JBG0;C9JY26;E7ES60;Q9BZG1-4;Q9BZG1-2	Ras-related protein Rab-34
PIK3C3	20.1293	20.5796	19.3477	0	13.597	205900000	10	Q8NEB9;A8MYT4;M0R308;K7ENH3;K7EIV6	Q8NEB9;A8MYT4	Phosphatidylinositol 3-kinase catalytic subunit type 3;Phosphatidylinositol 3-kinase
NAA20	18.8606	23.5439	21.8799	0.0005123	3.8611	157520000	4	P61599;A8MZB2	P61599;A8MZB2	N-alpha-acetyltransferase 20
DRG2	24.6279	25.0141	23.7709	0	97.847	1901200000	25	P55039;A8MZF9;J3QKW7;J3QRI9;J3KRL5;J3QR71;J3QL90;J3QKV7;J3QLF3	P55039;A8MZF9;J3QKW7;J3QRI9	Developmentally-regulated GTP-binding protein 2
SRRM1	25.447	25.714	24.5641	0	84.849	7011000000	48	Q8IYB3;A9Z1X7;E9PCT1;Q8IYB3-2;M0R088;M0R1E7;M0QXG5	Q8IYB3;A9Z1X7;E9PCT1;Q8IYB3-2;M0R088	Serine/arginine repetitive matrix protein 1
KIAA0930	19.4173	20.3271	17.9693	0.00083043	3.3576	61464000	1	Q6ICG6;B0QY16;Q6ICG6-3;Q6ICG6-2	Q6ICG6;B0QY16;Q6ICG6-3;Q6ICG6-2	Uncharacterized protein KIAA0930
EWSR1	28.3258	28.2418	26.7375	0	72.916	16555000000	43	Q01844;B0QYK0;Q01844-6;Q01844-3;Q01844-5;C9JGE3;Q01844-2;H7BY36;Q01844-4	Q01844;B0QYK0;Q01844-6;Q01844-3;Q01844-5;C9JGE3;Q01844-2;H7BY36	RNA-binding protein EWS
UBE2I	28.0266	28.3408	27.0349	0	25.001	4795900000	19	P63279;H3BQQ9;B0QYN7;H3BPC4	P63279;H3BQQ9;B0QYN7;H3BPC4	SUMO-conjugating enzyme UBC9
SLC25A17	22.5497	20.4687	17.1015	0.00017928	4.8911	111070000	1	O43808;B0QYW5;B4DU97;F8WE74	O43808;B0QYW5;B4DU97;F8WE74	Peroxisomal membrane protein PMP34
CPNE1	27.9937	28.2512	27.2085	0	120.18	16896000000	66	Q99829;B0QZ18;A6PVH9;F2Z2V0;E7ENH5;Q5JX56;Q5JX58;Q5JX59;Q5JX60;Q5JX44;Q5JX55;Q5JX45;Q5JX54;Q5JX61;Q5JX52;Q5JX57;E7EV27;H0Y524;Q5JX53	Q99829;B0QZ18;A6PVH9;F2Z2V0;E7ENH5;Q5JX56;Q5JX58;Q5JX59;Q5JX60;Q5JX44;Q5JX55;Q5JX45	Copine-1
SIRT1	18.2517	17.9648	17.9717	0	6.6498	10498000	2	Q96EB6;B0QZ35;E9PC49;Q96EB6-2	Q96EB6;B0QZ35;E9PC49;Q96EB6-2	NAD-dependent protein deacetylase sirtuin-1;SirtT1 75 kDa fragment
COMMD6	19.1133	22.4251	19.8257	0.0037903	2.5452	45927000	1	Q7Z4G1;B0QZ40;Q7Z4G1-2	Q7Z4G1;B0QZ40;Q7Z4G1-2	COMM domain-containing protein 6
ZMYND11	23.7083	22.1904	20.1122	0	8.4022	714110000	9	Q15326;Q5BJG6;B0QZE2;E7ENI9;J3QKD2;Q15326-4;Q15326-5;Q15326-2;Q15326-6;Q15326-3	Q15326;Q5BJG6;B0QZE2;E7ENI9;J3QKD2;Q15326-4;Q15326-5;Q15326-2;Q15326-6;Q15326-3	Zinc finger MYND domain-containing protein 11
APOC3	18.4666	21.0108	21.2768	0	16.917	32575000	3	P02656;B0YIW2	P02656;B0YIW2	Apolipoprotein C-III
ARCN1	28.328	28.3236	27.6911	0	208.61	30530000000	143	P48444;B0YIW6;P48444-2;E9PK34	P48444;B0YIW6;P48444-2	Coatomer subunit delta
FBLN1	21.7105	21.2987	20.4388	0	44.838	267630000	8	P23142-4;B1AHL2;P23142;B1AHM7;H7C1M6;B1AHM9;P23142-2;P23142-3	P23142-4;B1AHL2;P23142;B1AHM7;H7C1M6;B1AHM9;P23142-2;P23142-3	Fibulin-1
ESPN	18.8604	17.4763	17.3185	0	5.4959	0	1	B1AK53;B1AK53-2	B1AK53;B1AK53-2	Espin
MBNL3;MBNL1	24.8556	25.6406	24.7032	0	7.5106	1412700000	11	Q9NUK0;B1AKI6;Q9NUK0-4;Q9NUK0-3;Q9NUK0-2;C9J4T8;B1AKI2;B1AKI5;B1AKI4;Q9NUK0-5	Q9NUK0;B1AKI6;Q9NUK0-4;Q9NUK0-3;Q9NUK0-2;C9J4T8	Muscleblind-like protein 3
NRD1	24.629	25.0636	24.3397	0	100.01	4806200000	80	O43847;O43847-2;B1AKJ5;G3V1R5;F5H7V1;H0Y5G9	O43847;O43847-2;B1AKJ5;G3V1R5;F5H7V1	Nardilysin
EIF4ENIF1	20.7526	20.3047	18.9179	0	15.754	204040000	11	Q9NRA8;Q9NRA8-2;B1AKL4;Q9NRA8-3;B1AKL6;B1AKL5;B0QYZ7	Q9NRA8;Q9NRA8-2;B1AKL4;Q9NRA8-3	Eukaryotic translation initiation factor 4E transporter
MRPL43	24.3906	23.9224	23.1226	0	15.689	617420000	10	Q8N983;H0Y6Y8;B1AL05;Q8N983-4;Q8N983-3;Q8N983-2;Q8N983-6;Q8N983-7;M0R051;H0YBU8	Q8N983;H0Y6Y8;B1AL05;Q8N983-4;Q8N983-3;Q8N983-2;Q8N983-6;Q8N983-7;M0R051	39S ribosomal protein L43, mitochondrial
SMG7	19.2988	19.238	17.7162	0.0022584	2.8812	71358000	2	Q92540;B1ALB4;E9PD50;Q92540-2;Q92540-5;Q92540-4;E9PEK3	Q92540;B1ALB4;E9PD50;Q92540-2;Q92540-5;Q92540-4;E9PEK3	Protein SMG7
SLC9A1	18.4743	18.5904	17.5547	0.00728	2.216	9468400	1	P19634;B1ALD5;P19634-2	P19634;B1ALD5;P19634-2	Sodium/hydrogen exchanger 1
PHYH	25.3181	25.0136	24.134	0	80.049	2397800000	26	O14832;B1ALH6;O14832-2;C9IYS5;C9JR86	O14832;B1ALH6;O14832-2	Phytanoyl-CoA dioxygenase, peroxisomal
ARHGEF7	21.478	21.171	20.4484	0	43.496	342640000	11	Q14155-1;B1ALK7;Q14155-5;Q14155;E7EUY6;Q14155-6;Q14155-2;Q14155-3;E9PDQ5;E7EU80;Q15052;C9JAD7;C9JDI6;B1ANY6;E7ENL8;Q15052-2	Q14155-1;B1ALK7;Q14155-5;Q14155;E7EUY6;Q14155-6;Q14155-2;Q14155-3	Rho guanine nucleotide exchange factor 7
TMEM9	24.1294	23.8878	22.8134	0.00034941	4.2971	576430000	6	Q9P0T7;B1ALM5	Q9P0T7;B1ALM5	Transmembrane protein 9
KANK4	20.4684	19.1411	18.8276	0.0019446	2.9716	112240000	1	Q5T7N3;B1ALP6;Q5T7N3-2	Q5T7N3;B1ALP6;Q5T7N3-2	KN motif and ankyrin repeat domain-containing protein 4
LPHN2;ADGRL2	24.827	22.6341	21.8023	0	58.787	2848200000	33	O95490;O95490-2;B1ALU1;B1ALU3;O95490-5;O95490-7;O95490-6;H0Y5C0;O95490-3;O95490-4;H0Y3V3;O94910;K7ERC3;K7EK47;O94910-2	O95490;O95490-2;B1ALU1;B1ALU3;O95490-5;O95490-7;O95490-6;H0Y5C0;O95490-3;O95490-4	Latrophilin-2
PALM2-AKAP2;PALM2	24.4102	23.1959	21.8674	0	15.924	1159400000	18	B1ALY0;Q8IXS6-2;Q8IXS6;C9JA33;C9JZH4	B1ALY0;Q8IXS6-2;Q8IXS6;C9JA33	Paralemmin-2
UNC13B	17.2298	17.1435	15.8294	0.00017886	4.8334	41761000	2	O14795;F8W8M9;B1AM27	O14795;F8W8M9;B1AM27	Protein unc-13 homolog B
CTTNBP2NL	18.7004	18.784	17.6512	0.0096007	1.9982	30177000	2	Q9P2B4;B1AMN7	Q9P2B4;B1AMN7	CTTNBP2 N-terminal-like protein
2006-09-01	24.8093	23.9108	23.556	0	147.36	1673900000	23	Q14141;B1AMS2;Q14141-2;Q14141-4;Q14141-3	Q14141;B1AMS2;Q14141-2;Q14141-4	Septin-6
CD58	18.796	17.9782	21.911	0.00098896	3.2146	85498000	2	P19256-3;P19256;H0YDI1;B1AMW1;P19256-2	P19256-3;P19256;H0YDI1;B1AMW1;P19256-2	Lymphocyte function-associated antigen 3
GUK1	23.2593	23.1913	22.7253	0	10.064	338610000	9	Q16774;B1ANH5;B1ANH0;B1ANG9;B1ANH6;B1ANH2;B1ANH3;Q16774-2;Q16774-3	Q16774;B1ANH5;B1ANH0;B1ANG9;B1ANH6;B1ANH2;B1ANH3;Q16774-2;Q16774-3	Guanylate kinase
USF1;USF2	22.8594	23.2744	20.8405	0	48.094	222760000	9	P22415;B1AQP1;P22415-2;Q15853;Q15853-3;M0R1C6;M0QYU7;H0YD59;E9PME6;M0QXT0;B4DLJ1;Q15853-4;Q15853-2	P22415;B1AQP1;P22415-2;Q15853;Q15853-3;M0R1C6;M0QYU7;H0YD59;E9PME6;M0QXT0;B4DLJ1;Q15853-4;Q15853-2	Upstream stimulatory factor 1;Upstream stimulatory factor 2
GMEB1	22.1721	18.8444	18.6966	0	9.6845	103010000	3	Q9Y692;B1AT46;Q9Y692-2	Q9Y692;B1AT46;Q9Y692-2	Glucocorticoid modulatory element-binding protein 1
PSAP	29.0922	28.3953	27.0799	0	92.056	40984000000	91	P07602;B1AVU8;C9JIZ6;P07602-2;P07602-3	P07602;B1AVU8;C9JIZ6;P07602-2;P07602-3	Prosaposin;Saposin-A;Saposin-B-Val;Saposin-B;Saposin-C;Saposin-D
JMJD6	22.635	22.7373	20.5059	0	26.217	270580000	7	Q6NYC1;B2WTI3;B2WTI4;K7EJU9;Q6NYC1-2;Q6NYC1-3	Q6NYC1;B2WTI3;B2WTI4;K7EJU9;Q6NYC1-2;Q6NYC1-3	Bifunctional arginine demethylase and lysyl-hydroxylase JMJD6
PHC2	23.269	23.044	22.0573	0	19.649	968850000	14	Q8IXK0;B3KPJ4;Q8IXK0-2;Q8IXK0-4;Q8IXK0-5;Q8IXK0-3;H7C528	Q8IXK0;B3KPJ4;Q8IXK0-2;Q8IXK0-4;Q8IXK0-5;Q8IXK0-3	Polyhomeotic-like protein 2
ISCU	23.574	24.7005	22.4616	0	10.413	752090000	9	Q9H1K1;F5H5N2;B4DNC9;B3KQ30;Q9H1K1-2	Q9H1K1;F5H5N2;B4DNC9;B3KQ30;Q9H1K1-2	Iron-sulfur cluster assembly enzyme ISCU, mitochondrial
WDR20	18.2167	18.1942	17.0662	0.0016305	3.0519	0	2	B3KR43;Q8TBZ3;Q8TBZ3-2;Q8TBZ3-4;Q8TBZ3-5;Q8TBZ3-6;Q8TBZ3-7	B3KR43;Q8TBZ3;Q8TBZ3-2;Q8TBZ3-4;Q8TBZ3-5;Q8TBZ3-6;Q8TBZ3-7	WD repeat-containing protein 20
NDUFAF5	21.3343	20.4485	19.9909	0.0040945	2.4819	86987000	1	Q5TEU4;B3KR61;Q5TEU4-2	Q5TEU4;B3KR61;Q5TEU4-2	NADH dehydrogenase [ubiquinone] 1 alpha subcomplex assembly factor 5
ZKSCAN1	22.2046	21.134	21.3916	0	15.9	360130000	12	P17029;B3KRF7;E9PC66	P17029;B3KRF7;E9PC66	Zinc finger protein with KRAB and SCAN domains 1
EIF3H	26.9855	26.6079	26.3297	0	67.27	8281700000	65	O15372;B3KS98;E5RJT0;E5RGU4;E5RFW7;E5RFH0;E5RHC7;E5RH59	O15372;B3KS98;E5RJT0	Eukaryotic translation initiation factor 3 subunit H
MORF4L1	26.5661	26.2806	24.2947	0	52.459	4274700000	42	B3KTM8;Q9UBU8;Q9UBU8-2;H0YLJ3;H0YMJ0;Q9UBU8-3;H0YM21;H0YNE0;H0YMT8;H0YLV1;H0YNX3;H0YNI8	B3KTM8;Q9UBU8;Q9UBU8-2;H0YLJ3;H0YMJ0;Q9UBU8-3;H0YM21;H0YNE0	Mortality factor 4-like protein 1
SLC30A6	21.8547	21.233	20.8217	0.00083195	3.3872	171890000	2	Q6NXT4;B3KU87;B5MCR8;Q6NXT4-4;Q6NXT4-3;Q6NXT4-2	Q6NXT4;B3KU87;B5MCR8;Q6NXT4-4;Q6NXT4-3;Q6NXT4-2	Zinc transporter 6
NAP1L1	28.1856	29.2043	27.7158	0	116.35	15651000000	40	F8W118;F8VV59;B7Z9C2;B3KV44;H0YHC3;F8VRJ2;H0YH88;B7Z4K9	F8W118;F8VV59;B7Z9C2;B3KV44;H0YHC3;F8VRJ2;H0YH88	Nucleosome assembly protein 1-like 1
PHF23	22.7537	22.7253	22.077	0	5.4915	458170000	5	Q9BUL5;I3L4Q4;B3KVH8;Q9BUL5-2;I3L0Y2;I3L410;I3L1N0;Q9BUL5-3	Q9BUL5;I3L4Q4;B3KVH8;Q9BUL5-2;I3L0Y2	PHD finger protein 23
ZCCHC10	21.9949	18.5901	16.9118	0.00083431	3.4486	12539000	1	Q8TBK6-2;Q8TBK6;B3KVL5	Q8TBK6-2;Q8TBK6;B3KVL5	Zinc finger CCHC domain-containing protein 10
CENPH	19.8727	20.325	20.1177	0.0075617	2.1637	51169000	1	Q9H3R5;D6RBJ6;H0Y9E6;B3KVZ3	Q9H3R5;D6RBJ6;H0Y9E6;B3KVZ3	Centromere protein H
ADCY6;ADCY5	18.0639	19.0897	18.2157	0.0019433	2.9592	48541000	4	O43306;O95622;B3KWA8;O95622-2;O43306-2	O43306;O95622;B3KWA8;O95622-2;O43306-2	Adenylate cyclase type 6;Adenylate cyclase type 5
CDIPT	24.1818	24.0495	23.1953	0	7.9717	381570000	9	O14735;B3KY94;O14735-3;H3BUR9	O14735;B3KY94;O14735-3	CDP-diacylglycerol--inositol 3-phosphatidyltransferase
TSPAN7	23.6727	23.0241	21.5517	0	16.546	234120000	6	P41732;B4DDG0;B4E171	P41732;B4DDG0;B4E171	Tetraspanin-7;Tetraspanin
TMEM168	20.9886	21.7411	19.5028	0	6.5792	189830000	6	Q9H0V1;B4DDS0;C9IZT1;C9JVE9;H7C268	Q9H0V1;B4DDS0;C9IZT1;C9JVE9;H7C268	Transmembrane protein 168
PTDSS1	22.2815	20.4536	20.0485	0	9.659	202050000	4	P48651;B4DE85;P48651-2	P48651;B4DE85;P48651-2	Phosphatidylserine synthase 1
LARS	26.483	26.6241	25.2295	0	322.7	19074000000	155	Q9P2J5;B4DER1;B4DJ10	Q9P2J5;B4DER1;B4DJ10	Leucine--tRNA ligase, cytoplasmic
MTERF4	21.0234	18.4293	19.3286	0.00035392	4.5786	64164000	2	Q7Z6M4;C9JNJ7;B4DFP7	Q7Z6M4;C9JNJ7;B4DFP7	Transcription termination factor 4, mitochondrial;mTERF domain-containing protein 2 processed
SMARCE1	26.5675	25.6742	24.9717	0	59.564	4752000000	47	Q969G3;B4DGM3;Q969G3-6;Q969G3-5;Q969G3-3;Q969G3-2;Q969G3-4;J3QKS7;K7EMQ8;H7C048;J3KT85;J3QR61;J3QKX6	Q969G3;B4DGM3;Q969G3-6;Q969G3-5;Q969G3-3;Q969G3-2;Q969G3-4;J3QKS7;K7EMQ8;H7C048	SWI/SNF-related matrix-associated actin-dependent regulator of chromatin subfamily E member 1
MSI2	25.1164	24.6724	24.1656	0	20.046	1168600000	16	Q96DH6;Q96DH6-2;B4DHE8;J3KTC1;J3QKT5;B4DM51;Q96DH6-3	Q96DH6;Q96DH6-2;B4DHE8;J3KTC1;J3QKT5;B4DM51;Q96DH6-3	RNA-binding protein Musashi homolog 2
RABEP2	20.5391	20.4138	17.6595	0.00017743	4.6328	124840000	3	Q9H5N1;B4DHR0;Q9H5N1-2	Q9H5N1;B4DHR0;Q9H5N1-2	Rab GTPase-binding effector protein 2
COX11	22.8143	22.6775	20.3031	0	14.256	331460000	4	Q9Y6N1;B4DI26;Q9Y6N1-2;I3L4E7	Q9Y6N1;B4DI26;Q9Y6N1-2;I3L4E7	Cytochrome c oxidase assembly protein COX11, mitochondrial
CDC25B	18.8042	18.5254	18.4127	0.0074223	2.1896	0	1	P30305;P30305-2;G8JLH2;B4DIG0;P30305-4	P30305;P30305-2;G8JLH2;B4DIG0;P30305-4	M-phase inducer phosphatase 2
EXOC7	24.1856	24.2296	23.0093	0	64.383	2373100000	36	Q9UPT5;B4DJ07;Q9UPT5-2;Q9UPT5-5;Q9UPT5-1;Q9UPT5-6;Q9UPT5-4;C9JME6;B5MCY9;K7ERQ5;C9JKC2	Q9UPT5;B4DJ07;Q9UPT5-2;Q9UPT5-5;Q9UPT5-1;Q9UPT5-6	Exocyst complex component 7
2005-09-01	24.0532	21.8138	19.6131	0	6.458	525210000	6	Q99719;Q99719-2;F8W9E5;E7EQM7;C9JM82;E7EPG2;B4DJ62;E7EX32;G3XAH0	Q99719;Q99719-2;F8W9E5;E7EQM7;C9JM82;E7EPG2;B4DJ62;E7EX32;G3XAH0	Septin-5
VWA9	23.1242	23.4827	21.8775	0	21.177	925290000	14	Q96SY0;H3BRY6;B4DVT3;B4DJL6;Q96SY0-4;Q96SY0-3	Q96SY0;H3BRY6;B4DVT3;B4DJL6;Q96SY0-4;Q96SY0-3	von Willebrand factor A domain-containing protein 9
CS	29.9044	29.1934	28.562	0	270.92	48206000000	133	O75390;B4DJV2;F8VPF9;F8VPA1;F8W1S4;F8VRP1;F8VX68;F8W4S1;H0YIC4;F8VTT8;F8VZK9;F8VX07;F8W642;F8VRI6;F8VR34;F8VWQ5;F8VU34;F8W0J2	O75390;B4DJV2	Citrate synthase, mitochondrial;Citrate synthase
TBC1D7	18.2317	20.1444	17.0482	0.0043942	2.4402	32270000	2	Q9P0N9;Q5SZL8;Q5SZM2;U3KQD8;Q5SZM1;U3KPY5;B4DK47;Q5SZL3;U3KPS8;Q5SZL5;Q5SZL6;Q5SZL4;Q9P0N9-4;Q9P0N9-2;U3KQQ0;Q9P0N9-3	Q9P0N9;Q5SZL8;Q5SZM2;U3KQD8;Q5SZM1;U3KPY5;B4DK47;Q5SZL3;U3KPS8;Q5SZL5;Q5SZL6;Q5SZL4;Q9P0N9-4;Q9P0N9-2;U3KQQ0;Q9P0N9-3	TBC1 domain family member 7
ECE1	25.738	25.006	23.8649	0	109.69	5710100000	78	P42892;P42892-3;B4DKB2;P42892-4;P42892-2;E9PJG1;E9PHZ1;E9PN99	P42892;P42892-3;B4DKB2;P42892-4;P42892-2	Endothelin-converting enzyme 1
PSD3	19.55	17.943	17.8902	0.0036398	2.5701	11418000	2	Q9NYI0;B4DKF8;E5RJ29;J3KQK0;Q9NYI0-3;Q9NYI0-2	Q9NYI0;B4DKF8;E5RJ29;J3KQK0;Q9NYI0-3;Q9NYI0-2	PH and SEC7 domain-containing protein 3
STAT2	19.5836	18.2874	18.6781	0	9.6986	91262000	2	P52630;B4DLC8;P52630-4	P52630;B4DLC8;P52630-4	Signal transducer and activator of transcription 2
HN1L	27.4473	27.8529	26.7053	0	43.764	7602500000	41	Q9H910;B4DLH4;A6NGP5;Q9H910-2;H3BU16;H3BMV3;H3BMT0;H3BTV5;H3BMM8;B4E1P3;H3BS08	Q9H910;B4DLH4;A6NGP5;Q9H910-2;H3BU16;H3BMV3;H3BMT0;H3BTV5	Hematological and neurological expressed 1-like protein
	26.9889	26.8114	25.816	0	123.01	7508500000	43	B4DLN1;B4E1E9;P52815;I3L1E8	B4DLN1;B4E1E9
STRAP	27.3614	27.6913	26.7922	0	85.201	13803000000	61	Q9Y3F4;B4DNJ6;H0YH33	Q9Y3F4;B4DNJ6	Serine-threonine kinase receptor-associated protein
ACY1;ABHD14A-ACY1	26.0299	26.0983	25.5025	0	130.15	5398800000	65	Q03154;B4DNW0;Q03154-4;C9JMV9;Q03154-2;Q03154-3;C9JYZ0;F8WC59	Q03154;B4DNW0;Q03154-4;C9JMV9;Q03154-2;Q03154-3	Aminoacylase-1
ALG1	23.2494	22.8287	23.1189	0	6.7151	774840000	8	Q9BT22;B4DP08;K7EID2;C9J202	Q9BT22;B4DP08;K7EID2	Chitobiosyldiphosphodolichol beta-mannosyltransferase
SMN1;SMN2	25.4154	24.2821	23.4593	0	40.599	704780000	8	Q16637;B4DP61;E7EQZ4;Q16637-3;Q16637-4;Q16637-2;H0YBZ9	Q16637;B4DP61;E7EQZ4;Q16637-3;Q16637-4;Q16637-2	Survival motor neuron protein
C2	20.1269	19.577	23.973	0	10.185	717340000	6	P06681;E9PDZ0;B4DQI1;P06681-3;P06681-2;H0Y3H6;B4E1Z4;H0Y868;E7ETN3	P06681;E9PDZ0;B4DQI1;P06681-3;P06681-2;H0Y3H6;B4E1Z4;H0Y868;E7ETN3	Complement C2;Complement C2b fragment;Complement C2a fragment
TRA2A	26.2695	25.5227	24.3481	0	21.171	3036700000	26	Q13595;B4DQI6;Q13595-3;Q13595-2	Q13595;B4DQI6;Q13595-3;Q13595-2	Transformer-2 protein homolog alpha
SEC61A1	28.8786	28.195	27.8235	0	193.78	20720000000	64	P61619;B4DR61;P61619-3;C9JJV4;H7C1Q9;C9JXC6;H7C069;A6NK38;F2Z2C7;A6NIF9	P61619;B4DR61;P61619-3	Protein transport protein Sec61 subunit alpha isoform 1
STK24	25.9082	26.34	24.8147	0	66.484	4758300000	44	Q9Y6E0-2;B4DR80;Q9Y6E0;H0Y630;Q5JV98;Q5JV99	Q9Y6E0-2;B4DR80;Q9Y6E0;H0Y630;Q5JV98	Serine/threonine-protein kinase 24;Serine/threonine-protein kinase 24 36 kDa subunit;Serine/threonine-protein kinase 24 12 kDa subunit
ZDHHC20	23.309	21.9854	21.1267	0	31.19	346700000	7	Q5W0Z9;Q5W0Z9-3;B4DRN8;Q5W0Z9-4;Q5W0Z9-2	Q5W0Z9;Q5W0Z9-3;B4DRN8;Q5W0Z9-4;Q5W0Z9-2	Probable palmitoyltransferase ZDHHC20;Palmitoyltransferase
LSM14A	25.164	25.3293	24.3631	0	14.872	2472700000	24	Q8ND56;B4DTG6;Q8ND56-2;K7EMZ9	Q8ND56;B4DTG6;Q8ND56-2;K7EMZ9	Protein LSM14 homolog A
RASA1	19.5	18.4948	17.5058	0.00067363	3.5819	77642000	2	P20936;E9PGC0;P20936-2;B4DTL2;Q68CU6	P20936;E9PGC0;P20936-2;B4DTL2;Q68CU6	Ras GTPase-activating protein 1
MTAP	25.8445	26.5878	24.8621	0	53.851	4540500000	47	Q13126;B4DUC8;Q13126-4;Q13126-3;Q13126-2;J3QSB7;Q13126-7;Q13126-6;Q13126-5;F2Z2F3;F8WES2;J3KRN1	Q13126;B4DUC8;Q13126-4;Q13126-3;Q13126-2;J3QSB7;Q13126-7;Q13126-6;Q13126-5	S-methyl-5-thioadenosine phosphorylase;Purine nucleoside phosphorylase
TMBIM1	24.8386	25.1241	21.684	0	11.169	595680000	6	Q969X1;C9JEN3;C9IYT2;F8WDY4;C9IZ27;C9JW19;C9JWV9;B4DUD2	Q969X1;C9JEN3;C9IYT2;F8WDY4;C9IZ27;C9JW19;C9JWV9;B4DUD2	Protein lifeguard 3
CNN2	28.1962	27.9276	26.4476	0	196.09	11822000000	72	Q99439;B4DUT8;B4DDF4;Q99439-2;H3BVI6;K7ES69;H3BQH0;U3KPS3;P51911;K7EQ72;K7ER02;B7Z7E1	Q99439;B4DUT8;B4DDF4;Q99439-2;H3BVI6	Calponin-2;Calponin
HNRNPC	31.5477	30.9392	30.1515	0	121.87	145000000000	181	P07910-2;G3V4W0;B4DY08;G3V4C1;P07910-4;P07910-3;G3V251;G3V5X6;G3V3K6;G3V2D6;B4DSU6;B2RXH8;G3V5V7;G3V4M8;G3V2H6;Q86SE5;E5RG71;B3KT61;Q86SE5-3	P07910-2;G3V4W0;B4DY08;G3V4C1;P07910-4;P07910-3;G3V251;G3V5X6;G3V3K6;G3V2D6	Heterogeneous nuclear ribonucleoproteins C1/C2
TGFBR1	18.1989	21.6018	18.3752	0	5.3335	86672000	2	P36897;F8W1R9;B4DY26;P36897-3;P36897-2;F8VXZ5	P36897;F8W1R9;B4DY26;P36897-3;P36897-2	TGF-beta receptor type-1;Receptor protein serine/threonine kinase
SUCO	18.046	17.7894	17.1771	0	6.3742	34010000	2	Q9UBS9;B4DYM4;Q5H945;Q9UBS9-2	Q9UBS9;B4DYM4;Q5H945;Q9UBS9-2	SUN domain-containing ossification factor
NARF;NARFL	19.5129	18.5337	16.5709	0.0022562	2.8713	0	1	Q9UHQ1;Q9H6Q4;B4DZZ6;J3QRB0;H3BSH2;J3KS48;J3KT43;E9PH27;E7EP87;Q9H6Q4-3;Q9UHQ1-4;Q9UHQ1-3;Q9UHQ1-2	Q9UHQ1;Q9H6Q4;B4DZZ6;J3QRB0;H3BSH2;J3KS48;J3KT43;E9PH27;E7EP87;Q9H6Q4-3;Q9UHQ1-4;Q9UHQ1-3;Q9UHQ1-2	Nuclear prelamin A recognition factor;Cytosolic Fe-S cluster assembly factor NARFL
TVP23B;TVP23C	24.9943	22.1212	23.1789	0	7.4389	559000000	7	Q9NYZ1;K7ENL4;J3QL63;J3QL47;B4E0Q0;J3KS67;C9JYS5;Q96ET8-3;Q96ET8;C9JPH1;Q96ET8-2	Q9NYZ1;K7ENL4;J3QL63;J3QL47;B4E0Q0;J3KS67;C9JYS5;Q96ET8-3;Q96ET8;C9JPH1;Q96ET8-2	Golgi apparatus membrane protein TVP23 homolog B;Golgi apparatus membrane protein TVP23 homolog;Golgi apparatus membrane protein TVP23 homolog C
PEX5	19.0463	21.2128	20.4542	0	9.6871	194060000	7	P50542;P50542-3;P50542-4;B4E0T2;P50542-2;H0YGT8	P50542;P50542-3;P50542-4;B4E0T2;P50542-2	Peroxisomal targeting signal 1 receptor
STK26	23.0434	22.5981	22.389	0	11.774	693050000	10	Q9P289;Q8NBY1;B4E0Y9;Q9P289-2;Q9P289-3;C9JJV0	Q9P289;Q8NBY1;B4E0Y9;Q9P289-2;Q9P289-3	Serine/threonine-protein kinase 26
ATE1	22.5075	23.2636	22.0758	0	28.683	359400000	14	B4E107;F5GXE4;O95260-2;O95260;B4DK25;H0Y5C2;Q5SQQ1	B4E107;F5GXE4;O95260-2;O95260;B4DK25;H0Y5C2	Arginyl-tRNA--protein transferase 1
DERL1	24.3032	23.3361	23.2102	0	13.226	498670000	7	Q9BUN8;B4E1G1;Q9BUN8-2;E5RGY0	Q9BUN8;B4E1G1;Q9BUN8-2;E5RGY0	Derlin-1
RBPMS	24.6005	25.345	23.9822	0	30.018	982840000	22	Q93062;Q93062-3;B4E3T4;Q93062-4;Q93062-5;Q93062-2;H0YBU9;H0YC46;E5RJD7;E5RFP4;E5RJ31	Q93062;Q93062-3;B4E3T4;Q93062-4;Q93062-5;Q93062-2;H0YBU9	RNA-binding protein with multiple splicing
CDCA5	24.6687	23.3892	22.6993	0	9.694	724320000	13	Q96FF9;B5MBX0;H0YCL8	Q96FF9;B5MBX0	Sororin
STEAP2	19.6076	19.2834	18.5889	0.0016263	3.0217	31669000	1	Q8NFT2;C9JHX5;C9JLP2;B5MC02;Q8NFT2-3;Q8NFT2-2	Q8NFT2;C9JHX5;C9JLP2;B5MC02;Q8NFT2-3;Q8NFT2-2	Metalloreductase STEAP2
EPCAM	22.5224	17.9252	22.2774	0	11.777	277750000	6	P16422;B5MCA4	P16422;B5MCA4	Epithelial cell adhesion molecule
PES1	26.7053	26.1913	25.4154	0	79.294	8947400000	67	O00541;B5MCF9;O00541-2;B3KXD6;H7C267	O00541;B5MCF9;O00541-2;B3KXD6	Pescadillo homolog
C2orf43;LDAH	22.2507	22.0373	21.3485	0.00034996	4.3252	249660000	8	Q9H6V9;Q9H6V9-2;C9JHU6;C9JUM0;B5MCU4;B5MDU6;Q9H6V9-4;Q9H6V9-3	Q9H6V9;Q9H6V9-2;C9JHU6;C9JUM0;B5MCU4;B5MDU6;Q9H6V9-4;Q9H6V9-3	UPF0554 protein C2orf43
TSPAN9	23.7387	23.7816	20.6734	0	11.824	380230000	7	B5MD23;O75954	B5MD23;O75954	Tetraspanin;Tetraspanin-9
SREBF1	20.3053	20.3509	19.2065	0	6.3829	176640000	2	P36956;P36956-3;B5MD58;P36956-2;P36956-4;K7EMD1;K7EIW8	P36956;P36956-3;B5MD58;P36956-2;P36956-4;K7EMD1;K7EIW8	Sterol regulatory element-binding protein 1;Processed sterol regulatory element-binding protein 1
RFT1	22.7885	21.6908	20.9987	0.00051335	3.8943	335470000	4	Q96AA3;B5MDE0	Q96AA3;B5MDE0	Protein RFT1 homolog
RAN	29.8467	30.2421	29.3321	0	120.9	41761000000	74	P62826;B5MDF5;J3KQE5;F5H018;H0YFC6;B4DV51	P62826;B5MDF5;J3KQE5;F5H018;H0YFC6	GTP-binding nuclear protein Ran
MAPK12	19.916	22.2682	18.5641	0	38.128	115710000	4	P53778;B5MDL5;P53778-2	P53778;B5MDL5;P53778-2	Mitogen-activated protein kinase 12
ERCC6L	19.3225	20.22	21.9255	0	8.4183	568680000	8	Q2NKX8;B5MDQ0	Q2NKX8;B5MDQ0	DNA excision repair protein ERCC-6-like
2010-09-01	24.1048	25.4236	23.8934	0	101.4	2255800000	36	Q9P0V9;E7EW69;B5ME97;Q9P0V9-2;E7EX04;Q9P0V9-3;C9JEW2;C9JNR7;F5H1F2;C9JEQ7;F5GYV2;F5H1W3;F8WC85	Q9P0V9;E7EW69;B5ME97;Q9P0V9-2;E7EX04;Q9P0V9-3	Septin-10
EML3	17.7668	18.5368	17.299	0.00131	3.1045	50542000	2	Q32P44;Q32P44-2;G3V195;G3V1D0;B7WPE2;H0Y3M3	Q32P44;Q32P44-2;G3V195;G3V1D0;B7WPE2;H0Y3M3	Echinoderm microtubule-associated protein-like 3
CHN2	22.0447	22.8731	20.8727	0	18.37	366530000	10	P52757;B7Z1V0;F5H003;P52757-9;P52757-8;B8ZZU1;H7C0V3;C9JQ94;P52757-5;P52757-4;P52757-3;H7C138;F5GWP4;P52757-6;P52757-7	P52757;B7Z1V0;F5H003;P52757-9;P52757-8	Beta-chimaerin
TOM1L2	21.3963	19.2462	20.4271	0.00017966	4.9443	126890000	3	Q6ZVM7;Q6ZVM7-2;B7Z2L7;F5H3S6;B7Z2U2;Q6ZVM7-4;Q6ZVM7-3	Q6ZVM7;Q6ZVM7-2;B7Z2L7;F5H3S6;B7Z2U2;Q6ZVM7-4;Q6ZVM7-3	TOM1-like protein 2
SGCE	22.1529	21.6109	18.7087	0	38.801	192010000	7	O43556;E9PEH6;C9JR67;B7Z2R4;O43556-3;O43556-4	O43556;E9PEH6;C9JR67;B7Z2R4;O43556-3;O43556-4	Epsilon-sarcoglycan
UBE2E1;UBE2E2;UBE2E3	23.1583	23.4661	18.9412	0.00017921	4.8884	235490000	4	P51965;Q96LR5;Q969T4;P51965-3;C9J2P0;H7C061;B7Z306;R4GND1;R4GN80;P51965-2;R4GN77;C9J180	P51965;Q96LR5;Q969T4;P51965-3;C9J2P0;H7C061;B7Z306;R4GND1;R4GN80;P51965-2;R4GN77;C9J180	Ubiquitin-conjugating enzyme E2 E1;Ubiquitin-conjugating enzyme E2 E2;Ubiquitin-conjugating enzyme E2 E3
CAST	24.1338	24.7522	22.9634	0	47.468	2401400000	43	P20810;P20810-5;P20810-2;E9PCH5;B7Z574;E7ESM9;P20810-8;B7Z468;P20810-6;E9PDE4;E7ES10;E7EVY3;P20810-3;P20810-4;P20810-9;P20810-7;H0Y7F0;E7EQ12;H0Y9H6;E7EQA0;H0YD33;F8W7E0;E7EQK6;H0Y944;H0YA91;D6RAA8;D6RBZ8;D6RC54;E7EN75;E9PSG1	P20810;P20810-5;P20810-2;E9PCH5;B7Z574;E7ESM9;P20810-8;B7Z468;P20810-6;E9PDE4;E7ES10;E7EVY3;P20810-3;P20810-4;P20810-9;P20810-7;H0Y7F0;E7EQ12;H0Y9H6;E7EQA0;H0YD33	Calpastatin
KIFC3	17.8235	19.9014	17.7977	0	10.333	98876000	5	Q9BVG8;B7Z896;F5H3M2;Q9BVG8-4;Q9BVG8-5;Q9BVG8-2;B7Z484;H3BMJ1;H3BTN1;H3BMR0;H3BV47;H3BTU1;H3BMQ3	Q9BVG8;B7Z896;F5H3M2;Q9BVG8-4;Q9BVG8-5;Q9BVG8-2;B7Z484	Kinesin-like protein KIFC3;Kinesin-like protein
FGD4	20.5497	20.2995	19.4693	0	21.057	295120000	9	Q96M96;B7Z493;E9PJX4;F8VWL3;F8W1R0;E9PNX0;Q96M96-2;E9PQT1;Q96M96-3;H0YDQ0	Q96M96;B7Z493;E9PJX4;F8VWL3;F8W1R0	FYVE, RhoGEF and PH domain-containing protein 4
ZNF346	23.7878	22.1111	22.1147	0	10.398	384620000	6	Q9UL40;B7Z4J8;D6RJ07;Q9UL40-3;Q9UL40-2;B7Z4N4	Q9UL40;B7Z4J8;D6RJ07;Q9UL40-3;Q9UL40-2;B7Z4N4	Zinc finger protein 346
ST7;ST7L	21.2705	20.308	20.0571	0	11.439	182280000	7	E7EPW5;G3XAH9;E9PCV1;B7Z4U3;B7Z4L1;E7EPD9;H7BXS2;Q9NRC1-6;Q9NRC1-5;Q9NRC1-4;Q9NRC1-3;Q9NRC1-2;Q8TDW4;Q9NRC1;E7ENZ9;C9JU30;Q8TDW4-4;Q8TDW4-6;Q8TDW4-2;Q8TDW4-7;Q8TDW4-5;Q8TDW4-3;H0Y7M0;Q8TDW4-8;Q9NRC1-7	E7EPW5;G3XAH9;E9PCV1;B7Z4U3;B7Z4L1;E7EPD9;H7BXS2;Q9NRC1-6;Q9NRC1-5;Q9NRC1-4;Q9NRC1-3;Q9NRC1-2;Q8TDW4;Q9NRC1;E7ENZ9;C9JU30;Q8TDW4-4;Q8TDW4-6;Q8TDW4-2;Q8TDW4-7;Q8TDW4-5;Q8TDW4-3	Suppressor of tumorigenicity 7 protein;Suppressor of tumorigenicity 7 protein-like
P2RX4	20.7404	22.0565	19.3707	0	10.227	223430000	5	Q99571;B7Z4R5;Q99571-3;Q99571-2	Q99571;B7Z4R5;Q99571-3;Q99571-2	P2X purinoceptor 4;P2X purinoceptor
CCBL1	22.1332	22.5139	20.9424	0	10.86	277250000	5	Q16773;B7Z4W5;Q16773-2;Q5T278;Q16773-3;Q5T277;Q5T276	Q16773;B7Z4W5;Q16773-2;Q5T278;Q16773-3	Kynurenine--oxoglutarate transaminase 1
HS6ST2	18.3266	18.0535	18.0507	0.009898	1.9864	0	1	Q96MM7;B7Z5H6;J3KP99;Q96MM7-2;Q96MM7-3;Q96MM7-4	Q96MM7;B7Z5H6;J3KP99;Q96MM7-2;Q96MM7-3;Q96MM7-4	Heparan-sulfate 6-O-sulfotransferase 2
ANGEL2	20.7342	20.2489	19.5367	0.00017934	4.9053	148240000	4	Q5VTE6;B7Z5T0;Q5VTE6-2	Q5VTE6;B7Z5T0;Q5VTE6-2	Protein angel homolog 2
ARMC8	21.2646	20.2513	20.9251	0	9.5395	260350000	6	Q8IUR7;B7Z637;Q8IUR7-3;Q8IUR7-7;Q8IUR7-2;Q8IUR7-6;C9J2I1;G5E9V7;G5E9V6;Q8IUR7-8;H7C5B7;C9J8P8;C9JAA7;C9JBY2	Q8IUR7;B7Z637;Q8IUR7-3;Q8IUR7-7;Q8IUR7-2;Q8IUR7-6;C9J2I1;G5E9V7;G5E9V6;Q8IUR7-8	Armadillo repeat-containing protein 8
RANBP3	26.5165	26.0476	25.0933	0	51.162	5722200000	42	Q9H6Z4;Q9H6Z4-2;Q9H6Z4-3;B7Z7F3;K7EIJ4;K7EJV3;K7EN31;K7ENJ2;K7EID7;K7ENB9;K7EPW1;K7ESQ0;K7EMH9;K7EMT3	Q9H6Z4;Q9H6Z4-2;Q9H6Z4-3;B7Z7F3	Ran-binding protein 3
PMS1	20.2348	19.6804	17.2356	0	8.4628	149450000	8	P54277;Q3BDU3;E9PC65;B7ZAA0;P54277-3;P54277-4;P54277-2;E9PH88	P54277;Q3BDU3;E9PC65;B7ZAA0;P54277-3;P54277-4;P54277-2	PMS1 protein homolog 1
GPR89B;GPR89A;GPR89C	21.4568	21.8808	18.9801	0	15.144	237580000	6	P0CG08;B7ZAQ6;U3KPV2;E9PKY3;B7ZAQ6-2;B7ZAQ6-3;A6NKF9	P0CG08;B7ZAQ6;U3KPV2;E9PKY3;B7ZAQ6-2;B7ZAQ6-3;A6NKF9	Golgi pH regulator B;Golgi pH regulator A;Putative Golgi pH regulator C
GALK2	21.9644	22.4954	22.5364	0	11.683	453570000	13	Q01415;B7ZAX5;Q01415-2;H0YLL3;H0YLL8;H0YK10;H0YK30	Q01415;B7ZAX5;Q01415-2	N-acetylgalactosamine kinase
FOXP4	20.2774	20.8636	19.1879	0	16.429	148740000	4	Q8IVH2;B7ZBM3;Q8IVH2-3;Q8IVH2-2	Q8IVH2;B7ZBM3;Q8IVH2-3;Q8IVH2-2	Forkhead box protein P4
SH3GLB2	22.2416	22.8686	21.0784	0	11.929	280580000	10	Q9NR46;B7ZC38;B7ZC39;Q9NR46-2;F8WFB9	Q9NR46;B7ZC38;B7ZC39;Q9NR46-2	Endophilin-B2
SCARB1	27.1361	27.0132	25.5267	0	40.251	8748800000	52	Q8WTV0-2;B7ZKQ9;Q8WTV0-4;Q8WTV0;Q8WTV0-5;F5H4X0;Q8WTV0-3;F5H5E8	Q8WTV0-2;B7ZKQ9;Q8WTV0-4;Q8WTV0;Q8WTV0-5;F5H4X0;Q8WTV0-3	Scavenger receptor class B member 1
COX18	22.7734	22.4228	19.964	0	5.8726	217780000	5	Q8N8Q8;B7ZL88;Q8N8Q8-2;Q8N8Q8-3;Q8N8Q8-4	Q8N8Q8;B7ZL88	Mitochondrial inner membrane protein COX18
CPEB4;CPEB3;CPEB2	20.772	20.898	19.8252	0.000513	3.8807	187900000	5	Q17RY0;E5RJM0;B7ZLQ8;Q17RY0-2;Q8NE35;Q7Z5Q1;H0YBG1;H0Y9D9;E5RFP2;J3KN18;Q17RY0-3;Q7Z5Q1-7;Q7Z5Q1-5;Q7Z5Q1-4;Q7Z5Q1-6;Q7Z5Q1-3;Q8NE35-2;Q7Z5Q1-8;Q7Z5Q1-9	Q17RY0;E5RJM0;B7ZLQ8;Q17RY0-2;Q8NE35;Q7Z5Q1;H0YBG1;H0Y9D9;E5RFP2;J3KN18;Q17RY0-3;Q7Z5Q1-7;Q7Z5Q1-5;Q7Z5Q1-4;Q7Z5Q1-6;Q7Z5Q1-3;Q8NE35-2;Q7Z5Q1-8;Q7Z5Q1-9	Cytoplasmic polyadenylation element-binding protein 4;Cytoplasmic polyadenylation element-binding protein 3;Cytoplasmic polyadenylation element-binding protein 2
SNRNP27	25.8057	25.144	24.4558	0	10.66	695170000	9	Q8WVK2;B8ZZ98	Q8WVK2;B8ZZ98	U4/U6.U5 small nuclear ribonucleoprotein 27 kDa protein
METTL5	17.7263	22.3115	21.2492	0.00067499	3.625	93934000	4	Q9NRN9;B8ZZY8;B8ZZE3;B8ZZC8;F5H4E8;H7C0M7;E7EMN2	Q9NRN9;B8ZZY8;B8ZZE3;B8ZZC8	Methyltransferase-like protein 5
TAX1BP1	24.345	24.4074	23.5275	0	136.52	3474300000	32	Q86VP1;Q86VP1-2;B8ZZD4;Q86VP1-4;Q86VP1-3;H7C3L5;C9J7J4;F8WBU9;C9JBZ7	Q86VP1;Q86VP1-2;B8ZZD4;Q86VP1-4;Q86VP1-3	Tax1-binding protein 1
LSM5	23.7425	26.1576	25.5618	0	18.216	442370000	4	Q9Y4Y9;B8ZZF8	Q9Y4Y9;B8ZZF8	U6 snRNA-associated Sm-like protein LSm5
SUMO1	28.7791	28.1262	27.4036	0	17.008	8580200000	21	P63165;B8ZZN6;B8ZZJ0;B9A032;P63165-2;B8ZZ67	P63165;B8ZZN6;B8ZZJ0;B9A032	Small ubiquitin-related modifier 1
PTMA	29.5889	30.2235	29.2866	0	30.023	9858000000	21	P06454;P06454-2;B8ZZQ6;B8ZZA1;B8ZZW7;H7C2N1	P06454;P06454-2;B8ZZQ6;B8ZZA1;B8ZZW7;H7C2N1	Prothymosin alpha;Prothymosin alpha, N-terminally processed;Thymosin alpha-1
ATF2	23.6423	23.6517	22.326	0	20.842	853230000	13	P15336;B8ZZU6;P15336-5;F5H629;E9PBF9;E9PEK8;H7C2N6;P15336-3;P15336-7;P15336-4;C9JCI8;P15336-2;K7ESA4;P17544-5	P15336;B8ZZU6;P15336-5;F5H629;E9PBF9;E9PEK8;H7C2N6;P15336-3;P15336-7;P15336-4	Cyclic AMP-dependent transcription factor ATF-2
AVL9	20.1016	21.1276	21.219	0	13.166	279080000	10	Q8NBF6;B8ZZW5;Q8NBF6-2;H7C0I1	Q8NBF6;B8ZZW5;Q8NBF6-2;H7C0I1	Late secretory pathway protein AVL9 homolog
LGALSL	19.7244	20.8344	18.1305	0.0081288	2.0922	31581000	2	Q3ZCW2;F8WF17;B9A055;U3KQ88	Q3ZCW2;F8WF17;B9A055;U3KQ88	Galectin-related protein;Galectin
RBM12B	24.2206	23.4076	22.5718	0	38.296	3199100000	42	Q8IXT5;B9ZVT1;E5RHG1;E5RJ83;E5RJV8;E5RJW8	Q8IXT5;B9ZVT1	RNA-binding protein 12B
DNPEP	21.102	21.1541	17.1523	0.0022606	2.8937	69887000	2	E7EPX3;B9ZVU2;C9JRG3;E3W974;E5RJ35	E7EPX3;B9ZVU2;C9JRG3
WASH6P;WASH3P;WASH2P;WASH1;WASH4P	22.1114	22.525	21.0175	0	20.61	265970000	9	Q9NQA3;C4AMC7;Q6VEQ5;A8K0Z3;H3BV49;A8MWX3	Q9NQA3;C4AMC7;Q6VEQ5;A8K0Z3;H3BV49;A8MWX3	WAS protein family homolog 6;Putative WAS protein family homolog 3;WAS protein family homolog 2;WAS protein family homolog 1;Putative WAS protein family homolog 4
HAAO	20.0733	22.5244	18.8561	0	10.793	122650000	5	C9IY88	C9IY88
PDK1	19.5972	18.8281	18.0061	0.0001807	5.0562	38045000	2	Q15118;C9JKT3;C9IYB4;Q15118-2;F8WC75;F8WEJ6	Q15118;C9JKT3;C9IYB4;Q15118-2;F8WC75;F8WEJ6	[Pyruvate dehydrogenase (acetyl-transferring)] kinase isozyme 1, mitochondrial
SORBS2	19.2652	18.9443	18.0526	0.00099223	3.2819	61263000	1	O94875;O94875-12;O94875-4;O94875-10;O94875-5;O94875-2;O94875-9;O94875-8;O94875-11;C9J3W4;C9JL62;C9IZ89;H7BZK1;H7BXR3;O94875-3	O94875;O94875-12;O94875-4;O94875-10;O94875-5;O94875-2;O94875-9;O94875-8;O94875-11;C9J3W4;C9JL62;C9IZ89;H7BZK1;H7BXR3;O94875-3	Sorbin and SH3 domain-containing protein 2
CUTA	24.4865	24.9006	24.0944	0.00050977	3.7413	509780000	6	O60888;C9IZG4;O60888-3;O60888-2	O60888;C9IZG4;O60888-3;O60888-2	Protein CutA
SSR1	28.1954	27.8248	27.3404	0	53.274	8879100000	33	P43307;C9J3L8;C9J5W0;E9PAL7;C9IZQ1;P43307-2;C9JBX5;C9JY01	P43307;C9J3L8;C9J5W0;E9PAL7;C9IZQ1;P43307-2	Translocon-associated protein subunit alpha
FMNL2	17.8649	18.7251	17.4941	0.00034831	4.2428	55646000	5	Q96PY5;C9IZY8;Q96PY5-3;Q8IVF7;F8W1F5;Q8IVF7-2;Q8IVF7-3	Q96PY5;C9IZY8;Q96PY5-3	Formin-like protein 2
CHMP2B	24.4503	23.5171	23.7289	0	9.1533	606820000	5	Q9UQN3;C9J0A7;Q9UQN3-2	Q9UQN3;C9J0A7;Q9UQN3-2	Charged multivesicular body protein 2b
FOXP1	19.7552	17.45	16.6905	0.0024058	2.7995	20353000	1	Q9H334;G5E965;H0Y882;C9J0F0;E9PFD3;Q9H334-2;Q9H334-3;Q9H334-6;Q9H334-4;Q9H334-7	Q9H334;G5E965;H0Y882;C9J0F0;E9PFD3;Q9H334-2;Q9H334-3;Q9H334-6;Q9H334-4;Q9H334-7	Forkhead box protein P1
ZC3HC1	22.3755	22.5871	21.0465	0	25.257	477180000	13	Q86WB0;C9J0I9;Q86WB0-2;Q86WB0-3;F8WAU5;C9J672	Q86WB0;C9J0I9;Q86WB0-2;Q86WB0-3	Nuclear-interacting partner of ALK
CCDC126	21.8455	21.6915	22.3009	0.00050986	3.7442	98575000	3	Q96EE4;C9J0J0	Q96EE4;C9J0J0	Coiled-coil domain-containing protein 126
PFN2	26.6992	27.1761	25.6376	0	15.078	3156700000	15	P35080-2;C9J0J7;G5E9Q6;C9JQ45;C9J2N0	P35080-2;C9J0J7;G5E9Q6;C9JQ45;C9J2N0	Profilin-2;Profilin
SRI	25.2522	25.5448	26.0186	0	25.473	2040800000	12	P30626;C9J0K6;P30626-3;P30626-2;B4DHQ6	P30626;C9J0K6;P30626-3;P30626-2	Sorcin
NCOR2	18.2547	17.1802	17.6624	0	8.1665	72471000	2	Q9Y618;Q9Y618-3;C9JE98;C9J0Q5;C9JFD3;Q9Y618-5;Q9Y618-4;C9J7T7;H0YGK8;C9J330;C9JQE8;Q9Y618-2	Q9Y618;Q9Y618-3;C9JE98;C9J0Q5;C9JFD3;Q9Y618-5;Q9Y618-4;C9J7T7	Nuclear receptor corepressor 2
GORASP1	19.1915	19.4588	19.2515	0	7.7213	0	2	Q9BQQ3;H7C0J2;C9JBH8;C9J0V5;G3V0G1;Q9BQQ3-2;C9J5S6;C9J9V9;Q9BQQ3-3	Q9BQQ3;H7C0J2;C9JBH8;C9J0V5;G3V0G1;Q9BQQ3-2;C9J5S6;C9J9V9;Q9BQQ3-3	Golgi reassembly-stacking protein 1
PMS2	19.0036	17.2756	18.9033	0.0034849	2.5972	33891000	3	P54278;C9J167;P54278-3	P54278;C9J167;P54278-3	Mismatch repair endonuclease PMS2
EIF2AK3	19.2706	19.4919	19.2873	0	5.6996	109510000	2	Q9NZJ5;C9J185;E7ER02	Q9NZJ5;C9J185;E7ER02	Eukaryotic translation initiation factor 2-alpha kinase 3
RNF123	18.3021	19.5415	17.2504	0.0037891	2.5324	56059000	3	Q5XPI4;C9J266;Q5XPI4-2;C9JS59	Q5XPI4;C9J266;Q5XPI4-2;C9JS59	E3 ubiquitin-protein ligase RNF123
CBLL1	22.502	22.1113	22.757	0	8.244	400320000	7	Q75N03;C9J2P9;Q75N03-2	Q75N03;C9J2P9;Q75N03-2	E3 ubiquitin-protein ligase Hakai
POLR2B	26.0183	25.2193	24.5451	0	160.43	9551600000	131	P30876;C9J2Y9;C9J4M6	P30876;C9J2Y9;C9J4M6	DNA-directed RNA polymerase II subunit RPB2;DNA-directed RNA polymerase
CMSS1	27.0652	25.5623	25.0136	0	16.271	2885300000	17	Q9BQ75;C9J384;Q9BQ75-2;H7C515	Q9BQ75;C9J384;Q9BQ75-2	Protein CMSS1
CROT	22.8506	22.3565	21.2616	0	28.86	754990000	16	Q9UKG9;C9J3D7;Q9UKG9-3;Q9UKG9-2	Q9UKG9;C9J3D7;Q9UKG9-3	Peroxisomal carnitine O-octanoyltransferase
STARD3NL	22.7681	22.9255	17.9614	0	5.7055	174380000	4	O95772;C9JJ39;C9J3F5;C9JPX5;C9JKL2	O95772;C9JJ39;C9J3F5;C9JPX5;C9JKL2	MLN64 N-terminal domain homolog
CBWD1;CBWD2;CBWD5;CBWD3;CBWD6;CBWD7	21.1517	22.4043	20.4546	0	9.5382	169230000	6	Q9BRT8;Q8IUF1;Q5RIA9;Q5JTY5;Q4V339;C9JGY1;Q5RIB0;C9J3G2;Q5RIA9-3;Q5JTY5-2;Q9BRT8-3;Q5RIB3;F8WEG4;Q9BRT8-2;A6NM15;S4R432;Q5RIB5;Q5JTY2;Q6NVZ8;F8WEU0;E7EUZ7;H0Y5V3;Q4V340;F2Z2T4;Q9BRT8-4;Q5RIB2;Q5JTY0;H0Y857;Q5RIA9-2	Q9BRT8;Q8IUF1;Q5RIA9;Q5JTY5;Q4V339;C9JGY1;Q5RIB0;C9J3G2;Q5RIA9-3;Q5JTY5-2;Q9BRT8-3;Q5RIB3;F8WEG4;Q9BRT8-2;A6NM15;S4R432;Q5RIB5;Q5JTY2;Q6NVZ8;F8WEU0;E7EUZ7;H0Y5V3;Q4V340;F2Z2T4;Q9BRT8-4	COBW domain-containing protein 1;COBW domain-containing protein 2;COBW domain-containing protein 5;COBW domain-containing protein 3;COBW domain-containing protein 6;Putative COBW domain-containing protein 7
MOSPD3	19.1935	19.8096	17.1818	0	5.3796	5820800	1	O75425;F8WF07;C9J3M4;O75425-4	O75425;F8WF07;C9J3M4;O75425-4	Motile sperm domain-containing protein 3
B4GALT4	24.6347	24.6081	23.3366	0	25.325	1784100000	23	O60513;C9J3R8;E7ETS9;C9J4S5;C9J5S0;C9JA31	O60513;C9J3R8;E7ETS9	Beta-1,4-galactosyltransferase 4;N-acetyllactosamine synthase;Lactotriaosylceramide beta-1,4-galactosyltransferase
TMEM98	22.8596	22.209	21.3989	0.00083084	3.3637	176120000	3	Q9Y2Y6;C9J3Y0;J3QS57;J9JIC8;C9J6Q8	Q9Y2Y6;C9J3Y0;J3QS57;J9JIC8;C9J6Q8	Transmembrane protein 98
MKRN2	21.9277	22.1112	19.5798	0	8.7165	223840000	7	Q9H000;C9J494;Q9H000-2	Q9H000;C9J494;Q9H000-2	Probable E3 ubiquitin-protein ligase makorin-2
LSAMP	19.5672	19.7132	19.7493	0.009895	1.9834	89247000	2	Q13449;C9J5G3;H3BLU2;F5H5G1	Q13449;C9J5G3;H3BLU2;F5H5G1	Limbic system-associated membrane protein
LIN9	20.6756	20.4335	17.7063	0.00099174	3.2795	80366000	2	Q5TKA1;C9J5J4;H7C4T7;H0Y322;Q5TKA1-3;Q5TKA1-2	Q5TKA1;C9J5J4;H7C4T7;H0Y322;Q5TKA1-3;Q5TKA1-2	Protein lin-9 homolog
MYADM	26.0005	25.5485	24.2933	0	15.812	1060700000	11	Q96S97;C9JZL8;C9J5M0;C9JC07;C9JJV6	Q96S97;C9JZL8;C9J5M0;C9JC07;C9JJV6	Myeloid-associated differentiation marker
AARSD1;PTGES3L-AARSD1	22.9377	24.403	23.527	0	38.4	1443300000	17	Q9BTE6-2;C9J5N1;Q9BTE6;Q9BTE6-3;L7N2F4;K7EQ85;K7N799	Q9BTE6-2;C9J5N1;Q9BTE6;Q9BTE6-3	Alanyl-tRNA editing protein Aarsd1
IGF1R	19.3897	17.0172	16.2302	0	9.1823	79368000	8	P08069;C9J5X1	P08069;C9J5X1	Insulin-like growth factor 1 receptor;Insulin-like growth factor 1 receptor alpha chain;Insulin-like growth factor 1 receptor beta chain;Tyrosine-protein kinase receptor
RPE;RPEL1	24.737	25.0753	24.6376	0	18.475	913390000	19	Q96AT9;C9J6A7;E7EW52;Q96AT9-5;Q96AT9-3;Q96AT9-2;C9IYE8;E7ESZ6;C9J8S0;C9J9T0;C9IZU8;Q96AT9-4;C9JCL8;Q2QD12;E9PBG9	Q96AT9;C9J6A7;E7EW52;Q96AT9-5;Q96AT9-3;Q96AT9-2;C9IYE8;E7ESZ6;C9J8S0;C9J9T0;C9IZU8;Q96AT9-4;C9JCL8;Q2QD12	Ribulose-phosphate 3-epimerase;Ribulose-phosphate 3-epimerase-like protein 1
GGPS1	18.6404	22.5111	21.3309	0.0022555	2.8686	155070000	2	O95749;C9J6G3;C9J7M1	O95749;C9J6G3;C9J7M1	Geranylgeranyl pyrophosphate synthase
FAM107B	26.2206	26.6555	25.4837	0	27.562	2590900000	29	Q9H098;C9J6N5;C9JQ40;C9JW51;Q9H098-2;C9J3Q3;X6RET8;C9JP05;C9JYP1;C9J6Y8;F8WCJ2	Q9H098;C9J6N5;C9JQ40;C9JW51;Q9H098-2;C9J3Q3;X6RET8;C9JP05	Protein FAM107B
UMAD1	22.9745	18.9231	16.5307	0	6.7381	24725000	1	C9J7I0	C9J7I0	UBAP1-MVB12-associated (UMA)-domain containing protein 1
GLT8D1	20.5795	21.4491	20.7451	0	6.4648	196540000	6	Q68CQ7;C9J880;Q68CQ7-2;C9JA13	Q68CQ7;C9J880;Q68CQ7-2;C9JA13	Glycosyltransferase 8 domain-containing protein 1
RNF13	23.4911	22.725	21.993	0	5.7685	441680000	7	O43567;C9J8T4;C9JYN7;C9JU37;C9JYY4;C9JRV0;F8WDJ5;C9J7B4;C9J383;C9IY58;C9JCY0;O43567-2	O43567;C9J8T4;C9JYN7;C9JU37;C9JYY4;C9JRV0;F8WDJ5;C9J7B4;C9J383;C9IY58;C9JCY0;O43567-2	E3 ubiquitin-protein ligase RNF13
COX17	26.1551	27.956	27.6634	0	62.8	2667100000	10	Q14061;C9J8T6;H7C4E5	Q14061;C9J8T6;H7C4E5	Cytochrome c oxidase copper chaperone
GTPBP8	21.5897	20.7343	19.8688	0.0040836	2.4524	128800000	2	Q8N3Z3;F8WBY6;C9J8V5	Q8N3Z3;F8WBY6;C9J8V5	GTP-binding protein 8
IGSF8	18.7653	19.0025	17.6974	0.00051099	3.7882	12921000	2	Q969P0;C9J8Z4;Q969P0-3	Q969P0;C9J8Z4;Q969P0-3	Immunoglobulin superfamily member 8
RPSA;RPSAP58	30.6205	30.6494	29.6708	0	167.95	67575000000	115	P08865;C9J9K3;A6NE09;C9JQR9	P08865;C9J9K3;A6NE09	40S ribosomal protein SA
NME6	21.5198	21.3987	22.01	0.00067408	3.594	149170000	3	C9JQB1;C9J9V6;O75414;O75414-2	C9JQB1;C9J9V6;O75414	Nucleoside diphosphate kinase;Nucleoside diphosphate kinase 6
NMD3	22.5871	22.8822	20.6401	0	11.691	493380000	9	Q96D46;C9JA08;C9J0B9	Q96D46;C9JA08	60S ribosomal export protein NMD3
SSR3	26.7958	26.7933	25.5873	0	6.9121	1699500000	11	Q9UNL2;C9JA28;Q9UNL2-2	Q9UNL2;C9JA28;Q9UNL2-2	Translocon-associated protein subunit gamma
SRSF7	29.7675	28.6422	28.6537	0	40.02	22541000000	51	Q16629;C9JAB2;Q16629-3;Q16629-2;Q16629-4;F8WEA1	Q16629;C9JAB2;Q16629-3;Q16629-2;Q16629-4	Serine/arginine-rich splicing factor 7
HIGD1A	25.1288	25.1225	24.701	0	13.169	461190000	12	Q9Y241;C9JAW5;C9JNU6;Q9Y241-2	Q9Y241;C9JAW5;C9JNU6;Q9Y241-2	HIG1 domain family member 1A, mitochondrial
FXN	25.351	25.0456	23.2406	0	13.839	1143900000	12	Q16595;C9JAX1;Q16595-3;H7C585;Q16595-2	Q16595;C9JAX1;Q16595-3;H7C585;Q16595-2	Frataxin, mitochondrial;Frataxin intermediate form;Frataxin(56-210);Frataxin(78-210);Frataxin mature form
FGG	27.0118	26.3256	25.7931	0	116.25	9721900000	64	P02679;C9JEU5;C9JC84;P02679-2;C9JPQ9;C9JU00	P02679;C9JEU5;C9JC84;P02679-2	Fibrinogen gamma chain
DRAP1	24.6737	24.6665	23.0712	0	9.5509	752120000	7	Q14919;Q14919-2;C9JCC6;E9PNC7;E9PQX9;E9PMW2	Q14919;Q14919-2;C9JCC6;E9PNC7;E9PQX9	Dr1-associated corepressor
TMUB1	26.3825	24.6389	23.1797	0	14.184	760790000	11	Q9BVT8;C9JE12;C9JCW7	Q9BVT8;C9JE12;C9JCW7	Transmembrane and ubiquitin-like domain-containing protein 1
AAMP	24.2613	24.5589	24.127	0	32.995	1062000000	20	Q13685;C9JG97;C9JEH3;C9JTS3;H7C0R2	Q13685;C9JG97;C9JEH3;C9JTS3	Angio-associated migratory cell protein
PCYT1A	25.446	25.4763	24.465	0	28.698	2996700000	35	P49585;C9JEJ2;C9J050;H7C1T3;H7BZN1;Q9Y5K3;Q9Y5K3-3;C9J2E1;Q9Y5K3-2;Q9Y5K3-4;C9JPY0;C9JVS0;F8WAZ5;F8WBU2;F2Z2B1	P49585;C9JEJ2;C9J050;H7C1T3;H7BZN1	Choline-phosphate cytidylyltransferase A
GPS1	26.1926	25.5508	25.3086	0	48.001	3189800000	39	Q13098;C9JFE4;Q13098-5;Q13098-7;Q13098-6;J3QS88;J3KTB0;J3QLT0;J3KSA5;J3KRJ4;J3QQX0;J3QS84;J3QLE8;J3QL53;J3KRE8	Q13098;C9JFE4;Q13098-5;Q13098-7;Q13098-6	COP9 signalosome complex subunit 1
CYCS	31.4157	30.4922	29.9263	0	45.526	43714000000	89	P99999;C9JFR7;CON__P62894	P99999;C9JFR7	Cytochrome c
SYNJ1	17.8447	17.1085	18.1634	0.00099437	3.3157	12294000	1	O43426;O43426-4;C9JFZ1;J3KPK1;J3KQV8;O43426-2	O43426;O43426-4;C9JFZ1;J3KPK1;J3KQV8;O43426-2	Synaptojanin-1
ITM2C	25.4701	24.7517	23.7791	0	29.139	1892400000	20	Q9NQX7;C9JG41;Q9NQX7-2;Q9NQX7-3;F5H4I5;E7EUS6;B8ZZM6	Q9NQX7;C9JG41;Q9NQX7-2;Q9NQX7-3;F5H4I5;E7EUS6;B8ZZM6	Integral membrane protein 2C;CT-BRI3
APEH	25.7836	25.6158	24.5235	0	56.992	5167500000	42	P13798;C9JIF9;H7C393;H7C1U0;C9JLK2;F8WEH5	P13798;C9JIF9;H7C393	Acylamino-acid-releasing enzyme
MRPS34	27.0684	26.387	25.2115	0	48.892	4044000000	41	P82930;C9JJ19	P82930;C9JJ19	28S ribosomal protein S34, mitochondrial
VPS8	18.4775	18.25	18.0746	0.00018172	5.1651	124750000	4	Q8N3P4;C9JJN9;Q8N3P4-3;Q8N3P4-2;H7C058	Q8N3P4;C9JJN9;Q8N3P4-3;Q8N3P4-2	Vacuolar protein sorting-associated protein 8 homolog
TSSC4	24.0167	24.3829	24.0434	0	6.848	566070000	6	Q9Y5U2;C9JJV1;Q9Y5U2-2;A6NCC9;E9PME3;C9JHT9;E9PL88;C9JDU0	Q9Y5U2;C9JJV1;Q9Y5U2-2;A6NCC9;E9PME3;C9JHT9	Protein TSSC4
ARVCF	19.7286	19.9004	18.8638	0	21.603	169700000	14	O00192;C9JJX6;E9PDC3;O00192-2	O00192;C9JJX6;E9PDC3;O00192-2	Armadillo repeat protein deleted in velo-cardio-facial syndrome
CREM	24.3994	23.7052	22.6509	0	12.528	285300000	6	Q03060-6;G5E998;C9JK96;Q03060-32;Q03060-26;Q03060-21;Q03060-31;Q03060-8;E9PAR2;Q03060-23;Q03060-9;Q03060-24;Q03060;Q03060-2;C9IYM9;C9K092;J3KR46;J3KQC0;Q03060-14;Q03060-13;Q03060-30;Q03060-7;Q03060-12;Q03060-22;Q03060-20;Q03060-16;Q03060-15;Q03060-1;E9PB41;Q03060-11;Q03060-27;Q03060-10;Q03060-29;Q03060-25;Q03060-28;Q03060-19;Q03060-17	Q03060-6;G5E998;C9JK96;Q03060-32;Q03060-26;Q03060-21;Q03060-31;Q03060-8;E9PAR2;Q03060-23;Q03060-9;Q03060-24;Q03060;Q03060-2;C9IYM9;C9K092;J3KR46;J3KQC0;Q03060-14;Q03060-13;Q03060-30;Q03060-7;Q03060-12;Q03060-22;Q03060-20;Q03060-16;Q03060-15;Q03060-1	cAMP-responsive element modulator
MTPN	25.7431	26.4029	25.2696	0	57.206	1207600000	4	P58546;C9JL85	P58546;C9JL85	Myotrophin
OXNAD1	20.9975	20.2481	20.5945	0	6.412	137500000	5	Q96HP4;C9JLB7;U3KQU8	Q96HP4;C9JLB7;U3KQU8	Oxidoreductase NAD-binding domain-containing protein 1
POLR2H	27.2875	26.9838	26.3763	0	20.733	4029100000	22	P52434;C9JLU1;P52434-3;P52434-4;P52434-2;P52434-5	P52434;C9JLU1;P52434-3;P52434-4	DNA-directed RNA polymerases I, II, and III subunit RPABC3
APAF1	19.4171	20.3922	18.1878	0	16.371	200870000	10	O14727;O14727-4;C9JLV4;O14727-5;O14727-3;O14727-2;O14727-6;F8VNZ0	O14727;O14727-4;C9JLV4;O14727-5;O14727-3;O14727-2;O14727-6	Apoptotic protease-activating factor 1
FAM195B	22.8284	23.1402	22.2786	0.00083598	3.4874	197810000	5	C9JLW8;I3L2L5;I3L4Q0;I3L317	C9JLW8;I3L2L5;I3L4Q0;I3L317	Protein FAM195B
GPD1L	22.2237	21.6664	21.4475	0	9.5403	310740000	4	Q8N335;C9JM46;C9JFA7;C9K0P5	Q8N335;C9JM46;C9JFA7;C9K0P5	Glycerol-3-phosphate dehydrogenase 1-like protein;Glycerol-3-phosphate dehydrogenase [NAD(+)]
OARD1	18.8071	22.3866	20.9868	0	16.336	83174000	3	Q9Y530;C9JXC3;C9JNE2;H7C5Q1;C9J5P1	Q9Y530;C9JXC3;C9JNE2;H7C5Q1;C9J5P1	O-acetyl-ADP-ribose deacetylase 1
PUS10	21.377	21.2274	19.8569	0.0031842	2.6781	199410000	3	Q3MIT2;C9JNL8	Q3MIT2;C9JNL8	Putative tRNA pseudouridine synthase Pus10
RPL24	29.7533	29.7649	28.5767	0	21.85	23869000000	40	P83731;C9JXB8;C9JNW5	P83731;C9JXB8;C9JNW5	60S ribosomal protein L24
SEC22A	22.6374	22.1202	17.7579	0	6.6665	167580000	4	Q96IW7;C9JRY4;C9JNZ0;F8WAU7;C9JR77;C9J463;C9JZ27;C9JDJ8	Q96IW7;C9JRY4;C9JNZ0;F8WAU7;C9JR77;C9J463;C9JZ27;C9JDJ8	Vesicle-trafficking protein SEC22a
MBNL1	26.6477	26.7244	26.3026	0	38.97	4964600000	30	Q9NR56;C9JP00;Q86VM6;Q9NR56-7;C9JCX1;H7C4Y1	Q9NR56;C9JP00;Q86VM6;Q9NR56-7	Muscleblind-like protein 1
CRTAP	26.3635	25.1218	25.6708	0	53.004	6380400000	41	O75718;C9JP16	O75718;C9JP16	Cartilage-associated protein
NRF1	21.8175	22.9896	22.5847	0.005145	2.326	249660000	3	Q16656;C9JP85;Q16656-2;Q16656-4	Q16656;C9JP85;Q16656-2;Q16656-4	Nuclear respiratory factor 1
USP42	18.3402	18.8817	18.8631	0.00050693	3.6606	83564000	2	Q9H9J4;C9JPC9;Q9H9J4-2;E7EWZ4	Q9H9J4;C9JPC9;Q9H9J4-2;E7EWZ4	Ubiquitin carboxyl-terminal hydrolase 42
CCNL1	19.7638	21.2124	16.8634	0	5.7629	105860000	2	Q9UK58;C9JPL0;Q9UK58-4;Q9UK58-5	Q9UK58;C9JPL0;Q9UK58-4	Cyclin-L1
SLC6A6	23.8329	23.1407	22.4881	0.0034843	2.5904	670520000	5	P31641;C9JPV1;P31641-2	P31641;C9JPV1;P31641-2	Sodium- and chloride-dependent taurine transporter;Transporter
CCDC58	27.712	27.9733	26.2053	0	47.842	4452900000	24	Q4VC31;C9JQ41;H7C525;C9JBU9	Q4VC31;C9JQ41;H7C525	Coiled-coil domain-containing protein 58
STK11IP	21.5745	19.8263	18.8225	0	7.6878	283540000	7	Q8N1F8;C9JQV3;Q8N1F8-2	Q8N1F8;C9JQV3;Q8N1F8-2	Serine/threonine-protein kinase 11-interacting protein
DNAJB2	23.0568	22.8363	20.7368	0	12.435	348480000	9	P25686;C9JRD2;C9JXB9;P25686-2;C9J1G2;E7ETU0;C9JX00	P25686;C9JRD2;C9JXB9;P25686-2;C9J1G2;E7ETU0;C9JX00	DnaJ homolog subfamily B member 2
LIMD1	21.7172	22.1184	20.636	0	32.262	513160000	10	Q9UGP4;C9JRJ5	Q9UGP4;C9JRJ5	LIM domain-containing protein 1
EML2	18.4449	20.7953	18.8395	0.0006699	3.5062	124880000	3	O95834-3;O95834;K7ERR2;K7EIM1;K7EQR0;K7ERY9;K7EKU5;C9JRL6;K7EIK7;O95834-2	O95834-3;O95834;K7ERR2;K7EIM1;K7EQR0;K7ERY9;K7EKU5;C9JRL6;K7EIK7;O95834-2	Echinoderm microtubule-associated protein-like 2
LYRM4	23.0357	22.9371	23.7597	0.0040919	2.479	123330000	3	Q9HD34;F5H189;C9JY28;C9JRX8;C9J799;H7C4Q5	Q9HD34;F5H189;C9JY28;C9JRX8;C9J799;H7C4Q5	LYR motif-containing protein 4
CHCHD3	26.9388	26.2881	25.4801	0	30.109	4111200000	25	Q9NX63;C9JRZ6;F8WAR4;F8WD73	Q9NX63;C9JRZ6;F8WAR4	MICOS complex subunit MIC19
PRKAR1B;PRKAR1A	20.3806	20.4168	20.0342	0	6.0281	54292000	2	P31321;H7BYW5;C9JSK5;K7EKR1	P31321;H7BYW5;C9JSK5;K7EKR1	cAMP-dependent protein kinase type I-beta regulatory subunit
MEST	20.0357	20.3464	19.2023	0.00017957	4.941	34379000	4	Q5EB52;C9JWU9;C9JSW2;C9JW74;Q5EB52-3;Q5EB52-2;C9JRA9;C9JCM6	Q5EB52;C9JWU9;C9JSW2;C9JW74;Q5EB52-3;Q5EB52-2;C9JRA9;C9JCM6	Mesoderm-specific transcript homolog protein
CCM2	19.1031	19.4615	17.6754	0	10.787	64865000	4	Q9BSQ5;Q9BSQ5-2;C9JUH3;Q9BSQ5-3;Q9BSQ5-4;E9PEC4	Q9BSQ5;Q9BSQ5-2;C9JUH3;Q9BSQ5-3;Q9BSQ5-4;E9PEC4	Cerebral cavernous malformations 2 protein
CD63	28.4966	28.3764	27.8621	0	8.2494	9568200000	13	P08962;F8VNT9;F8VV56;F8W022;F8VWK8;C9JV86;P08962-3;P08962-2	P08962;F8VNT9;F8VV56;F8W022;F8VWK8;C9JV86;P08962-3;P08962-2	CD63 antigen;Tetraspanin
L2HGDH	24.278	23.9357	21.9033	0	48.657	1330100000	25	Q9H9P8;C9JVN9;Q9H9P8-2;G3V5S1;G3V272	Q9H9P8;C9JVN9;Q9H9P8-2	L-2-hydroxyglutarate dehydrogenase, mitochondrial
SLC35A3	22.7923	22.3086	20.721	0.0040848	2.455	223750000	2	Q9Y2D2;C9JW63;Q9Y2D2-3;Q9Y2D2-2	Q9Y2D2;C9JW63;Q9Y2D2-3;Q9Y2D2-2	UDP-N-acetylglucosamine transporter
NFIX	20.1246	18.0288	19.0889	0.00067488	3.623	47191000	1	Q14938;X6R5U1;K7EN08;C9JWJ8;Q14938-6;Q14938-5;Q14938-3;Q14938-2;Q14938-4	Q14938;X6R5U1;K7EN08;C9JWJ8;Q14938-6;Q14938-5;Q14938-3;Q14938-2;Q14938-4	Nuclear factor 1 X-type;Nuclear factor 1
MLLT4	19.5209	18.2361	17.8742	0.00051939	4.1433	115810000	2	P55196-3;C9JX92;P55196-2;H0Y7R8	P55196-3;C9JX92;P55196-2	Afadin
POP7	23.5696	22.494	21.9155	0.00050796	3.6971	139290000	3	O75817;C9JYM0	O75817;C9JYM0	Ribonuclease P protein subunit p20
NRCAM	22.6213	22.0825	20.6175	0	32.881	1136400000	21	Q92823;C9JYY6;F8W775;Q92823-3;Q92823-4;Q92823-6;Q92823-2;Q92823-5;C9JH43	Q92823;C9JYY6;F8W775;Q92823-3;Q92823-4;Q92823-6;Q92823-2;Q92823-5	Neuronal cell adhesion molecule
PON3	20.555	19.1399	19.483	0.00035386	4.5634	54167000	4	Q15166;C9JZ99;F8WD41	Q15166;C9JZ99;F8WD41	Serum paraoxonase/lactonase 3
INPP5K	21.9067	18.925	17.2441	0.00051948	4.1439	87636000	4	Q9BT40;C9JZB0;Q9BT40-2	Q9BT40;C9JZB0;Q9BT40-2	Inositol polyphosphate 5-phosphatase K
UBE2H	22.9223	24.8519	24.1555	0	13.754	488710000	11	P62256;C9JZG9;C9JZY6;H7C4M9;P62256-2;C9J8Q9	P62256;C9JZG9;C9JZY6;H7C4M9;P62256-2;C9J8Q9	Ubiquitin-conjugating enzyme E2 H
LRIG3	18.3312	17.7641	17.4619	0.0031817	2.663	26628000	1	Q6UXM1;F8VYZ5;C9K080;Q6UXM1-2	Q6UXM1;F8VYZ5;C9K080;Q6UXM1-2	Leucine-rich repeats and immunoglobulin-like domains protein 3
GMNN	23.7468	23.4913	18.7037	0	8.0764	215180000	5	O75496;C9K0U5;H7C608;E2QRF9	O75496;C9K0U5;H7C608;E2QRF9	Geminin
STX16;STX16-NPEPL1	19.4172	19.5664	19.1298	0.00051308	3.8832	47861000	4	O14662;O14662-5;Q96NX8;C9K0W8;G8JLE0;H3BU86;O14662-3;O14662-2;O14662-4;E9PLV7;E9PND6;B7ZBM4;B7ZBM5;H0YEW0;F8W9Z6;O14662-6	O14662;O14662-5;Q96NX8;C9K0W8;G8JLE0;H3BU86;O14662-3;O14662-2;O14662-4;E9PLV7;E9PND6;B7ZBM4;B7ZBM5;H0YEW0;F8W9Z6;O14662-6	Syntaxin-16
ALB	29.0109	28.4986	28.1097	0	141.15	55777000000	136	P02768;CON__P02768-1;H0YA55;B7WNR0;D6RHD5;C9JKR2;P02768-2;H7C013	P02768;CON__P02768-1;H0YA55;B7WNR0;D6RHD5;C9JKR2;P02768-2	Serum albumin
SUPT4H1	24.0277	24.6587	25.1622	0	8.6764	891090000	7	P63272;D3DTZ5;J3QSB9	P63272;D3DTZ5;J3QSB9	Transcription elongation factor SPT4
SGMS1;TMEM23	22.5568	22.1655	19.8366	0.0013087	3.0948	322930000	5	Q86VZ5;D3DWC4;B4DJU2;Q86VZ5-2	Q86VZ5;D3DWC4	Phosphatidylcholine:ceramide cholinephosphotransferase 1
PPP3R1	24.1857	25.2244	22.6408	0	29.319	666820000	14	P63098;F6U1T9;D3YTA9;H7BYZ3;Q96LZ3	P63098;F6U1T9;D3YTA9;H7BYZ3	Calcineurin subunit B type 1
RPL32	30.8645	30.7203	30.0974	0	60.746	45541000000	67	P62910;D3YTB1;F8W727;D3YTI8	P62910;D3YTB1;F8W727	60S ribosomal protein L32
TXNRD2	25.7542	24.7846	23.8106	0	44.195	3330700000	32	Q9NNW7;E7ENA2;D3YTF8;D3YTF9;Q9NNW7-2;Q9NNW7-3;Q9NNW7-4;E7EWK1	Q9NNW7;E7ENA2;D3YTF8;D3YTF9;Q9NNW7-2;Q9NNW7-3;Q9NNW7-4	Thioredoxin reductase 2, mitochondrial
CAMK2D	26.7066	26.8838	25.8136	0	80.548	10390000000	71	Q13557;Q13557-8;D6R938;E9PBG7;E9PF82;Q13557-12;Q13557-10;Q13557-6;Q13557-11;Q13557-3;Q13557-9;Q13557-5;Q13557-4;H0Y9J2;H0Y9C2;E9PBE8;E7EQE4;D6RHX9;D6RFJ0;E7ERS6;E7ETC9	Q13557;Q13557-8;D6R938;E9PBG7;E9PF82;Q13557-12;Q13557-10;Q13557-6;Q13557-11;Q13557-3;Q13557-9;Q13557-5;Q13557-4	Calcium/calmodulin-dependent protein kinase type II subunit delta
TRMT10A	21.3902	21.3779	18.6265	0	10.277	126360000	5	Q8TBZ6;D6R954;X6REK4	Q8TBZ6;D6R954;X6REK4	tRNA methyltransferase 10 homolog A
RELB	18.8505	20.8287	18.5715	0	7.3761	126270000	3	Q01201;D6R992;D6RIV7	Q01201;D6R992	Transcription factor RelB
RWDD4	17.6865	21.0968	21.1504	0.0079877	2.1146	27421000	1	Q6NW29;D6R9C7;D6RCM5;D6RDH6;K4DI92	Q6NW29;D6R9C7;D6RCM5;D6RDH6;K4DI92	RWD domain-containing protein 4
SLC41A3	21.5724	20.4164	19.4992	0.00067454	3.6079	91945000	2	Q96GZ6;Q96GZ6-6;Q96GZ6-5;D6RF72;D6R9S7;D6R9M9;D6RHE3;D6RDB0;D6R9X6;Q96GZ6-7;Q96GZ6-9;Q96GZ6-2	Q96GZ6;Q96GZ6-6;Q96GZ6-5;D6RF72;D6R9S7;D6R9M9;D6RHE3;D6RDB0;D6R9X6;Q96GZ6-7;Q96GZ6-9;Q96GZ6-2	Solute carrier family 41 member 3
CLDND1	23.5005	23.0472	22.0143	0	7.8475	222940000	5	Q9NY35;D6RD48;D6RAZ7;D6RIU2;D6RDP6;H0Y8T9;D6RHU6;D6RDY1;D6RA76;D6RC11;D6R9S8;D6RCE6;D6RFX6;D6RDI6;D6RCR8;Q9NY35-2	Q9NY35;D6RD48;D6RAZ7;D6RIU2;D6RDP6;H0Y8T9;D6RHU6;D6RDY1;D6RA76;D6RC11;D6R9S8;D6RCE6;D6RFX6;D6RDI6;D6RCR8;Q9NY35-2	Claudin domain-containing protein 1
DBN1	18.8417	20.3553	17.6872	0.0027135	2.7192	26828000	2	D6R9W4;D6RCR4	D6R9W4
SLC34A2	19.3031	18.369	16.5519	0.0048536	2.3919	0	1	O95436;D6RBC0;D6RA94;O95436-2	O95436;D6RBC0;D6RA94;O95436-2	Sodium-dependent phosphate transport protein 2B
TMEM33	25.9167	26.1904	25.8164	0	19.953	2408700000	16	P57088;D6RAA6;H0Y8N0	P57088;D6RAA6;H0Y8N0	Transmembrane protein 33
POLR2J;POLR2J3;POLR2J1;POLR2J2	23.6078	24.5357	23.3592	0	8.9331	299420000	6	P52435;D6RAG0;E7EP90;Q9H1A6;E2QRJ6;E7EWC6;Q9GZM3;Q9H1A7;A6NFM0;H0Y980;Q9GZM3-2;F8WF84	P52435;D6RAG0;E7EP90;Q9H1A6;E2QRJ6;E7EWC6;Q9GZM3;Q9H1A7;A6NFM0;H0Y980;Q9GZM3-2	DNA-directed RNA polymerase II subunit RPB11-a;DNA-directed RNA polymerase II subunit RPB11-b1;DNA-directed RNA polymerase II subunit RPB11-b2
SH3RF1	18.9017	17.569	15.9405	0.0022603	2.8934	0	1	Q7Z6J0;D6RAL3;D6RHX5;Q7Z6J0-3	Q7Z6J0;D6RAL3;D6RHX5;Q7Z6J0-3	E3 ubiquitin-protein ligase SH3RF1
COPS4	24.5527	25.3195	24.8426	0	68.14	2629800000	32	Q9BT78;D6RAX7;D6RFN0;Q9BT78-2;D6RD63;D6REK7	Q9BT78;D6RAX7;D6RFN0;Q9BT78-2;D6RD63	COP9 signalosome complex subunit 4
FAM169A	22.149	20.7784	20.5898	0.00035286	4.5175	270240000	4	Q9Y6X4;D6RB01	Q9Y6X4;D6RB01	Soluble lamin-associated protein of 75 kDa
SLC25A36;SLC25A33	21.2014	18.5366	18.5009	0.00099338	3.2894	33758000	1	Q96CQ1;Q9BSK2;D6RB26;D6RCF5;F6SDC8;Q96CQ1-2;Q96CQ1-3	Q96CQ1;Q9BSK2;D6RB26;D6RCF5;F6SDC8;Q96CQ1-2;Q96CQ1-3	Solute carrier family 25 member 36;Solute carrier family 25 member 33
AMACR	23.5899	23.2209	22.3221	0	28.596	616400000	16	Q9UHK6;D6RB81;Q9UHK6-5;V9GZ45;V9GYP4;Q9UHK6-2;V9GYU9;Q9UHK6-4	Q9UHK6;D6RB81;Q9UHK6-5;V9GZ45;V9GYP4;Q9UHK6-2;V9GYU9;Q9UHK6-4	Alpha-methylacyl-CoA racemase
CXXC5	19.9959	21.1575	18.8463	0	9.758	47975000	1	Q7LFL8;E7EV55;D6RDY2;D6RBE0;E7EVI8;Q7LFL8-2	Q7LFL8;E7EV55;D6RDY2;D6RBE0;E7EVI8;Q7LFL8-2	CXXC-type zinc finger protein 5
EPN3	20.5604	19.7979	18.9181	0.0078425	2.1255	66361000	2	Q9H201;D6RBR6;D6RFG3;D6REL6;I6L9I8;Q9H201-2;F6QWW5	Q9H201;D6RBR6;D6RFG3;D6REL6;I6L9I8;Q9H201-2;F6QWW5	Epsin-3
ELMOD2	25.8537	25.9261	25.9072	0	31.06	3379200000	22	Q8IZ81;D6RBS5;D6RHX2;V9GY58	Q8IZ81;D6RBS5	ELMO domain-containing protein 2
COMMD10	18.016	20.1185	18.9757	0.00052056	4.1692	6186400	2	Q9Y6G5;D6RC04;D6RJ90	Q9Y6G5;D6RC04;D6RJ90	COMM domain-containing protein 10
UIMC1	19.9403	21.1415	19.8279	0	12.256	203930000	5	Q96RL1;D6RC40;D6RCQ3;D6RCF3;Q96RL1-5;Q96RL1-2;D6R9M3;D6RDZ5;Q96RL1-3	Q96RL1;D6RC40;D6RCQ3;D6RCF3;Q96RL1-5;Q96RL1-2	BRCA1-A complex subunit RAP80
NHP2	26.5744	26.2368	24.7298	0	33.011	1800900000	17	Q9NX24;D6RC52;D6RCB9;J3QSY4;H0YC83	Q9NX24;D6RC52;D6RCB9;J3QSY4	H/ACA ribonucleoprotein complex subunit 2
RHOBTB3	21.945	20.5637	21.2377	0.0050039	2.3777	400790000	4	O94955;D6RC79	O94955;D6RC79	Rho-related BTB domain-containing protein 3
TCEAL4	20.2195	19.4372	18.3133	0.0016295	3.0409	21794000	2	Q96EI5;Q96EI5-2;J3KQY4;D6RHZ1;D6RIH3;D6RCE9;D6RD44	Q96EI5;Q96EI5-2;J3KQY4;D6RHZ1;D6RIH3;D6RCE9;D6RD44	Transcription elongation factor A protein-like 4
MRPS18C	26.2858	24.2393	22.951	0	5.3325	710470000	5	Q9Y3D5;H0YAG5;D6RCM2	Q9Y3D5;H0YAG5;D6RCM2	28S ribosomal protein S18c, mitochondrial
ALG13	20.6644	19.7718	16.9059	0.00035261	4.498	90126000	3	Q9NP73;D6RE84;Q9NP73-2;Q9NP73-3	Q9NP73;D6RE84;Q9NP73-2;Q9NP73-3	Putative bifunctional UDP-N-acetylglucosamine transferase and deubiquitinase ALG13
FAM175A	18.6086	18.8342	18.8674	0.0048513	2.3901	13748000	1	Q6UWZ7;D6REL5	Q6UWZ7;D6REL5	BRCA1-A complex subunit Abraxas
RNASET2	21.6434	20.5161	15.7353	0.00083361	3.4277	79927000	1	O00584;H0YAE9;D6REQ6;D6RHI9;O00584-2	O00584;H0YAE9;D6REQ6;D6RHI9;O00584-2	Ribonuclease T2
2011-09-01	28.0832	28.042	27.2699	0	323.31	19917000000	83	Q9NVA2;D6RGI3;D6RER5;Q9NVA2-2;D6RDU5;H0Y961;D6RDP1;D6R9Y6;H0Y9G8	Q9NVA2;D6RGI3;D6RER5;Q9NVA2-2;D6RDU5	Septin-11
MCC	21.127	21.4891	20.4396	0	21.156	313390000	8	P23508;P23508-2;D6REY2	P23508;P23508-2;D6REY2	Colorectal mutant cancer protein
STX18	25.696	25.0016	24.7449	0	53.747	2959000000	32	Q9P2W9;D6RF48;D6RD65;D6RC71;H0YAL4	Q9P2W9;D6RF48	Syntaxin-18
DCK	23.7472	24.1978	23.6054	0	10.413	745870000	12	P27707;D6RFG8;D6RCP9	P27707;D6RFG8;D6RCP9	Deoxycytidine kinase
YIPF3	24.4046	23.5111	22.7969	0	14.819	786850000	9	Q9GZM5;D6RFI3;E7EQR8;D6RGY8;H0Y9A1	Q9GZM5;D6RFI3;E7EQR8;D6RGY8	Protein YIPF3;Protein YIPF3, 36 kDa form III
SGTB	19.8381	21.2905	17.6746	0	6.1457	30780000	3	Q96EQ0;D6RFW1	Q96EQ0;D6RFW1	Small glutamine-rich tetratricopeptide repeat-containing protein beta
CCNH	20.3269	21.6094	21.0207	0	14.797	202140000	8	P51946;D6RHI7;D6RG18	P51946;D6RHI7;D6RG18	Cyclin-H
CENPK	22.4082	22.1596	21.3567	0	8.5754	181100000	8	Q9BS16;D6RJF0;D6RHD3;D6RBN6;D6RAX0;D6RC76	Q9BS16;D6RJF0;D6RHD3	Centromere protein K
GRK6	22.2759	20.9518	20.3489	0	17.3	306890000	8	P43250;P43250-2;D6RHX8;F8W9W2;P43250-3;P34947;Q5T060;D6RDA3;D6RHC7	P43250;P43250-2;D6RHX8;F8W9W2;P43250-3	G protein-coupled receptor kinase 6
EXOSC9	24.4943	24.7837	23.3412	0	22.932	1317600000	13	Q06265;Q06265-2;D6RIY6;Q06265-3;Q06265-4;D6R905;H0Y9L5;D6RA17;D6RAP4	Q06265;Q06265-2;D6RIY6;Q06265-3;Q06265-4;D6R905	Exosome complex component RRP45
SNX14	21.0552	21.1424	19.8914	0	30.914	322080000	11	Q9Y5W7;Q9Y5W7-2;D6RJG9;Q9Y5W7-3;Q9Y5W7-4;D6RDH9;H0Y926;Q5JRQ0;D6RBA7;D6RDA6	Q9Y5W7;Q9Y5W7-2;D6RJG9;Q9Y5W7-3;Q9Y5W7-4;D6RDH9	Sorting nexin-14
HNRNPLL;HNRPLL	24.7696	24.3303	23.6467	0	43.007	2253700000	37	Q8WVV9;D6W592;Q8WVV9-4;B7WPG3;Q8WVV9-5;C9IYN3;Q8WVV9-3;Q8WVV9-2;H7BXH8;H7C464;C9JJZ7	Q8WVV9;D6W592;Q8WVV9-4;B7WPG3;Q8WVV9-5	Heterogeneous nuclear ribonucleoprotein L-like
MMS22L	18.8316	17.8522	18.4208	0.0037945	2.5536	43702000	4	Q6ZRQ5;E2QRD4;H0Y8J1;H0YAJ2	Q6ZRQ5;E2QRD4;H0Y8J1;H0YAJ2	Protein MMS22-like
ELOVL5	25.0619	25.2414	24.5792	0	27.112	1172300000	13	Q9NYP7;E2QRH7;Q9NYP7-2;Q9NYP7-3	Q9NYP7;E2QRH7;Q9NYP7-2	Elongation of very long chain fatty acids protein 5
NSMCE2	22.0331	20.3015	20.7594	0.00035205	4.4513	123980000	4	Q96MF7;E5RIM1;E5RFJ1;E5RHW9;H0YB96	Q96MF7;E5RIM1;E5RFJ1;E5RHW9;H0YB96	E3 SUMO-protein ligase NSE2
ANKRD46	22.5912	18.0582	17.2684	0.00034819	4.2373	50548000	2	Q86W74;E5RHV2;E5RI20;E5RFM7;E5RI04;J3KP26;Q86W74-2	Q86W74;E5RHV2;E5RI20;E5RFM7;E5RI04;J3KP26;Q86W74-2	Ankyrin repeat domain-containing protein 46
NUDCD2	17.7075	23.8568	21.0862	0.00067511	3.6263	143400000	4	Q8WVJ2;E5RFP0	Q8WVJ2;E5RFP0	NudC domain-containing protein 2
EPHX2	24.8065	24.1134	23.4907	0	71.41	2281100000	53	P34913;E5RFU2;P34913-3;P34913-2;E5RFH6;H0YAW7;E5RI53	P34913;E5RFU2;P34913-3;P34913-2;E5RFH6	Bifunctional epoxide hydrolase 2;Cytosolic epoxide hydrolase 2;Lipid-phosphate phosphatase
TATDN1	22.1864	23.1568	21.1891	0	8.108	416650000	7	Q6P1N9;G5EA19;U3KQS5;E5RG17;H0YBX2;E5RGF2;Q6P1N9-2;E5RH86;E5RID7;E5RG62;E5RK70	Q6P1N9;G5EA19;U3KQS5;E5RG17;H0YBX2;E5RGF2;Q6P1N9-2	Putative deoxyribonuclease TATDN1
ZFAND1	19.2513	19.3139	19.1083	0.0011504	3.1733	43891000	3	Q8TCF1;E5RK75;E5RJ74;E5RGE5;E5RI74;Q8TCF1-2;Q8TCF1-4;Q8TCF1-3	Q8TCF1;E5RK75;E5RJ74;E5RGE5;E5RI74;Q8TCF1-2;Q8TCF1-4;Q8TCF1-3	AN1-type zinc finger protein 1
ATOX1	26.8771	26.921	26.0735	0	9.5812	1430200000	9	O00244;E5RGN3;E5RIM7	O00244;E5RGN3;E5RIM7	Copper transport protein ATOX1
RWDD1	22.9808	22.3734	22.3453	0	6.2427	174050000	6	Q9H446;E5RGQ3;Q9H446-2;E5RJE3;E5RGS5	Q9H446;E5RGQ3;Q9H446-2	RWD domain-containing protein 1
LYPLA1	24.5047	24.7537	23.3927	0.00017873	4.8134	944480000	7	O75608;E5RGR0;O75608-2	O75608;E5RGR0;O75608-2	Acyl-protein thioesterase 1
REEP4	23.9781	24.6804	22.5773	0	14.214	956720000	19	Q9H6H4;E5RGS2;Q9H6H4-2	Q9H6H4;E5RGS2;Q9H6H4-2	Receptor expression-enhancing protein 4;Receptor expression-enhancing protein
PFDN1	21.4213	22.7671	23.7676	0.00050761	3.6886	206050000	4	O60925;E5RGS4	O60925;E5RGS4	Prefoldin subunit 1
STMN2	26.4668	26.4744	26.2937	0.00051671	4.0385	3183200000	3	Q93045;E5RGX5;Q93045-2;Q9H169;E5RIR6;E7EVN3;Q9H169-3;Q9H169-4;Q9H169-2	Q93045;E5RGX5;Q93045-2	Stathmin-2;Stathmin
SLC36A1	21.2589	20.5193	19.7766	0.00050908	3.7239	107510000	4	Q7Z2H8;E5RHG5;E7EW39;Q7Z2H8-4;Q7Z2H8-3	Q7Z2H8;E5RHG5;E7EW39;Q7Z2H8-4;Q7Z2H8-3	Proton-coupled amino acid transporter 1
TCEB1	29.1589	28.4988	27.5137	0	114.21	9956800000	36	Q15369;E5RHG8;Q15369-2;R4GMY8	Q15369;E5RHG8;Q15369-2;R4GMY8	Transcription elongation factor B polypeptide 1
TMEM68	21.2964	19.5019	20.8088	0	5.7627	118990000	4	Q96MH6;E5RHU1;E5RJN2;E5RJI9;H0YAY9;H0YC64;E5RGT2;Q96MH6-2	Q96MH6;E5RHU1;E5RJN2;E5RJI9	Transmembrane protein 68
SARAF	21.7201	21.9409	17.6567	0.0050031	2.3776	167780000	2	Q96BY9;E5RHW0;H0YBH7;E5RFJ9;H0YAZ1;H0YAN9;Q96BY9-2	Q96BY9;E5RHW0;H0YBH7	Store-operated calcium entry-associated regulatory factor
ERLIN2	28.6947	28.1176	27.3015	0	106.73	24550000000	95	O94905;E5RHW4;E5RJ09;O94905-2;O94905-3	O94905;E5RHW4	Erlin-2
SGK3	20.8562	19.2106	18.6675	0.00051724	4.0582	79759000	4	Q96BR1;E5RJV7;E5RK28;E5RHX2;E5RHY6;Q96BR1-2	Q96BR1;E5RJV7;E5RK28;E5RHX2;E5RHY6;Q96BR1-2	Serine/threonine-protein kinase Sgk3
GYG2	20.3719	18.5802	19.6886	0.00018018	4.9945	35231000	1	O15488;E5RIC9;O15488-5;O15488-4;O15488-3;O15488-6;O15488-2	O15488;E5RIC9;O15488-5;O15488-4;O15488-3;O15488-6;O15488-2	Glycogenin-2
TTI2	21.6879	21.4205	19.9886	0.00034728	4.1768	166190000	5	Q6NXR4;E5RIH5	Q6NXR4;E5RIH5	TELO2-interacting protein 2
TBCA	23.4801	27.1778	26.5104	0	13.639	1577600000	11	O75347;E5RIW3;E5RJD8;E5RHG6;O75347-2;E5RIX8	O75347;E5RIW3;E5RJD8;E5RHG6;O75347-2	Tubulin-specific chaperone A
PEX2	17.1022	19.6445	18.0615	0.0013091	3.0973	14752000	1	P28328;E5RIW9	P28328;E5RIW9	Peroxisome biogenesis factor 2
AP3M2	19.6374	19.7846	19.6895	0.005153	2.3481	19869000	1	P53677;E5RJ52;H0YAY4	P53677;E5RJ52	AP-3 complex subunit mu-2
HGSNAT	23.6005	17.41	20.0415	0.0011485	3.1471	340510000	3	Q68CP4;E5RJN0;Q68CP4-2;E5RGH7;H0YAZ0	Q68CP4;E5RJN0;Q68CP4-2;E5RGH7;H0YAZ0	Heparan-alpha-glucosaminide N-acetyltransferase
MTFR1	21.7396	21.5704	22.2437	0	16.05	172650000	8	Q15390;H0YBZ4;E5RJS5;Q15390-2;H0YF01	Q15390;H0YBZ4;E5RJS5;Q15390-2	Mitochondrial fission regulator 1
COX7A2L	24.3669	18.5714	21.568	0.00083472	3.4509	211810000	1	O14548;E5RJZ1;H0YBD2	O14548;E5RJZ1;H0YBD2	Cytochrome c oxidase subunit 7A-related protein, mitochondrial
PIGG	21.3306	19.0352	18.99	0	10.954	195450000	8	Q5H8A4;E7EM50;Q5H8A4-4;Q5H8A4-2;D6RFE8;E7EWV1;D6R9J9;Q5H8A4-5;Q5H8A4-6;Q5H8A4-3;D6RD39	Q5H8A4;E7EM50;Q5H8A4-4;Q5H8A4-2;D6RFE8;E7EWV1;D6R9J9;Q5H8A4-5;Q5H8A4-6;Q5H8A4-3	GPI ethanolamine phosphate transferase 2
COPS6	25.9872	26.5588	25.2044	0	39.424	3127100000	29	Q7L5N1;E7EM64;H7C3T0	Q7L5N1;E7EM64	COP9 signalosome complex subunit 6
AKAP10	24.1972	23.1503	19.8197	0.00067193	3.5547	954920000	4	O43572;E7EMD6	O43572;E7EMD6	A-kinase anchor protein 10, mitochondrial
PPP1R2;PPP1R2P3	25.1508	25.1646	24.4726	0	11.061	827300000	15	P41236;Q6NXS1;E7EMN6;E7EUI7	P41236;Q6NXS1;E7EMN6;E7EUI7	Protein phosphatase inhibitor 2;Protein phosphatase inhibitor 2-like protein 3
HMCES	21.9452	21.9139	20.5409	0	11.434	243110000	7	Q96FZ2;E7EMP6;D6RAI0;D6RGK7;D6RAZ3;D6R9T3	Q96FZ2;E7EMP6;D6RAI0;D6RGK7;D6RAZ3;D6R9T3	Embryonic stem cell-specific 5-hydroxymethylcytosine-binding protein
NPC2	24.662	24.8348	24.0921	0	25.027	1288200000	8	P61916;J3KMY5;G3V3E8;E7EMS2;G3V3D1;G3V2V8;H0YIZ1;P61916-2	P61916;J3KMY5;G3V3E8;E7EMS2;G3V3D1;G3V2V8;H0YIZ1;P61916-2	Epididymal secretory protein E1
CYP1A1	19.8306	20.0147	19.3268	0.0081401	2.1093	86008000	3	P04798;E7EMT5;P04798-2	P04798;E7EMT5;P04798-2	Cytochrome P450 1A1;Cytochrome P450
TNIP1	19.9793	19.4195	19.7903	0.0001808	5.0757	55526000	3	Q15025;E7EMV7;Q15025-7;Q15025-8;Q15025-5;Q15025-6;Q15025-4;Q15025-3;Q15025-2;H0YC17;E7EW15	Q15025;E7EMV7;Q15025-7;Q15025-8;Q15025-5;Q15025-6;Q15025-4;Q15025-3;Q15025-2;H0YC17;E7EW15	TNFAIP3-interacting protein 1
TACC2	22.9087	23.2554	21.6163	0	32	955640000	12	O95359-2;Q4VXL4;E7EMZ9;E9PBC6;O95359-3;O95359;D6RAA5;Q4VXL8;O95359-6;O95359-1;O95359-5;H0Y9C3;H0Y911;H0Y9Y7;E9PGB3	O95359-2;Q4VXL4;E7EMZ9;E9PBC6;O95359-3;O95359;D6RAA5;Q4VXL8;O95359-6;O95359-1;O95359-5	Transforming acidic coiled-coil-containing protein 2
MAP4K4	25.2042	25.0073	24.1307	0	115.57	6556600000	83	E7EN19;E7ESS2	E7EN19;E7ESS2
MEN1	22.025	22.6293	20.8522	0	37.364	619720000	13	O00255-2;E7EN32;O00255;O00255-3;E7ET29;E7ENS2;E7EPR4	O00255-2;E7EN32;O00255;O00255-3	Menin
KIAA0319L	24.0481	23.6935	21.9388	0	43.324	1645800000	33	Q8IZA0;E7EN73;Q8IZA0-2;C9J519;Q8IZA0-3;B1AN15;H0Y4S8;B4DYG9	Q8IZA0;E7EN73;Q8IZA0-2;C9J519;Q8IZA0-3	Dyslexia-associated protein KIAA0319-like protein
ZNF143;SALL1;SALL3;ZNF774;ZNF76;ZNF777	17.3406	20.8161	20.6071	0.0019481	2.9982	146200000	3	P52747;E7EN86;P52747-2;P52747-3;Q9NSC2;Q9BXA9;Q6NX45;P36508;Q9ULD5;Q9ULD5-2;Q9ULD5-3;E7EX64;H3BSM9;P36508-2;Q9BXA9-3;Q9BXA9-4;Q9NSC2-2;Q9BXA9-2	P52747;E7EN86;P52747-2;P52747-3;Q9NSC2;Q9BXA9;Q6NX45;P36508;Q9ULD5;Q9ULD5-2;Q9ULD5-3;E7EX64;H3BSM9;P36508-2;Q9BXA9-3;Q9BXA9-4;Q9NSC2-2;Q9BXA9-2	Zinc finger protein 143;Sal-like protein 1;Sal-like protein 3;Zinc finger protein 774;Zinc finger protein 76;Zinc finger protein 777
C12orf43	23.4732	23.7352	22.1143	0	26.249	561870000	15	Q96C57;E7ENF1;F5H7W8;H0YGK4;G5EA44;F5H8B7;F5H3K2;H0YF83	Q96C57;E7ENF1;F5H7W8;H0YGK4;G5EA44;F5H8B7;F5H3K2	Uncharacterized protein C12orf43
SYNE1	21.2869	21.1808	18.036	0.0001787	4.8129	3878600000	9	Q8NF91;Q8NF91-4;E7ENN3;E9PEL9;Q8NF91-8;Q8NF91-2;Q8NF91-3;Q5JV20;F8WAI0;H0Y326;H0Y325;Q8NF91-9;Q8NF91-7	Q8NF91;Q8NF91-4;E7ENN3;E9PEL9;Q8NF91-8;Q8NF91-2	Nesprin-1
MAP4K4	17.5286	16.9762	19.6445	0.0081077	2.0655	27749000	1	O95819;E7ENQ1;H7C360;G3XAA2;G5E948;E7EX83;C9J840;H7C0P6;Q8N4C8;Q8N4C8-3;Q8N4C8-2;Q8N4C8-5;Q8N4C8-4;H7C3Z6;E7ETN6;Q9NRD5;F6V107;Q9NRD5-2	O95819;E7ENQ1;H7C360;G3XAA2;G5E948;E7EX83;C9J840;H7C0P6	Mitogen-activated protein kinase kinase kinase kinase 4
ABI2	22.8811	23.2975	20.2519	0	9.0171	403020000	8	Q9NYB9;Q9NYB9-2;E7EW77;E7EP65;J3KNB2;Q9NYB9-3;Q9NYB9-4;E9PEZ7;H7C3Q7;H0Y6B5	Q9NYB9;Q9NYB9-2;E7EW77;E7EP65;J3KNB2;Q9NYB9-3;Q9NYB9-4;E9PEZ7	Abl interactor 2
RPL14	30.884	30.7686	29.9854	0	30.035	38769000000	54	P50914;E7EPB3	P50914;E7EPB3	60S ribosomal protein L14
TDP1	20.0259	20.9051	18.001	0	14.038	207820000	13	Q9NUW8;G3V2F4;E7EPD8;Q9NUW8-2;G3V2J6;G3V2U6;H0YJ44;Q9BRS7;H0YJL7;G3V4W8;G3V5H9	Q9NUW8;G3V2F4;E7EPD8;Q9NUW8-2	Tyrosyl-DNA phosphodiesterase 1
ZCCHC17	22.2267	18.6316	17.1937	0	6.831	49080000	2	Q9NP64;E7EPF0;Q9NP64-2;Q9NP64-3	Q9NP64;E7EPF0;Q9NP64-2;Q9NP64-3	Nucleolar protein of 40 kDa
ACSL1	27.4437	27.1043	26.0215	0	130.99	18769000000	95	P33121;E7EPM6;P33121-2;P33121-3;B7Z3Z9;D6RER0;H0Y9U7;H0Y9Z9;D6RG07;Q9ULC5;Q9UKU0;Q9ULC5-3;Q9UKU0-2;E7ERD7;Q9UKU0-7;Q9ULC5-4;Q9UKU0-5;Q9UKU0-3;Q9UKU0-9;Q9UKU0-6;Q9UKU0-8;Q9UKU0-1	P33121;E7EPM6;P33121-2;P33121-3;B7Z3Z9	Long-chain-fatty-acid--CoA ligase 1
PRRC2C	25.4376	25.2909	24.2796	0	275.41	14584000000	156	E7EPN9;Q9Y520-4;Q9Y520;Q9Y520-5;Q9Y520-7;Q9Y520-3;Q9Y520-6;Q9Y520-2;H7C5N8	E7EPN9;Q9Y520-4;Q9Y520;Q9Y520-5;Q9Y520-7;Q9Y520-3;Q9Y520-6;Q9Y520-2	Protein PRRC2C
CHEK1	22.1527	21.847	22.2602	0	15.53	341100000	11	O14757;J3KN87;E7EPP6;O14757-2;O14757-3;E9PPA5;E9PJI4;E9PKQ3	O14757;J3KN87;E7EPP6;O14757-2;O14757-3;E9PPA5	Serine/threonine-protein kinase Chk1
STXBP4	21.9712	20.5085	18.8413	0	8.6826	231470000	5	Q6ZWJ1;E7EPP7;B5MCT9;Q6ZWJ1-2	Q6ZWJ1;E7EPP7;B5MCT9	Syntaxin-binding protein 4
PTPRM	19.2286	20.6706	18.9961	0	15.542	260740000	13	P28827;E7EPS8;F8WA38;P28827-2;J3KRV2;J3QRB4;O14522;O14522-1;J3QLI4;J3KT55;B1AJS0;B1AJR6;A0A075B6G9;B1AJR8;B1AJR9;A0A075B6H0	P28827;E7EPS8;F8WA38;P28827-2	Receptor-type tyrosine-protein phosphatase mu;Protein-tyrosine-phosphatase
NDUFV2	26.7934	25.9283	25.2821	0	55.713	3974100000	37	P19404;E7EPT4	P19404;E7EPT4	NADH dehydrogenase [ubiquinone] flavoprotein 2, mitochondrial
SNCA	24.3604	22.5548	21.4905	0	6.0468	252680000	4	P37840;E7EPV7;P37840-2;D6RA31;P37840-3	P37840;E7EPV7;P37840-2;D6RA31;P37840-3	Alpha-synuclein
CASP8	21.769	22.441	19.5972	0	19.175	312270000	8	Q14790;Q14790-4;Q14790-9;E7ETB7;E7EQ06;Q14790-6;Q14790-5;Q14790-8;Q14790-7;Q14790-3;Q14790-2;E7EQ01;E7EVN1;H7BZM4;C9JB29;H7C0E2	Q14790;Q14790-4;Q14790-9;E7ETB7;E7EQ06;Q14790-6;Q14790-5;Q14790-8;Q14790-7;Q14790-3;Q14790-2;E7EQ01;E7EVN1	Caspase-8;Caspase-8 subunit p18;Caspase-8 subunit p10
GOSR2	26.7516	25.8593	25.1995	0	29.321	2330900000	27	O14653;E7EQ34;O14653-2;O14653-3;I3L4Z6;I3L0K1;I3L1K7;I3L3V4;I3NI02	O14653;E7EQ34;O14653-2;O14653-3;I3L4Z6;I3L0K1;I3L1K7;I3L3V4	Golgi SNAP receptor complex member 2
UBA5	25.6301	26.1511	24.8185	0	61.411	3276200000	31	Q9GZZ9;E7EQ61;E7EWE1;Q9GZZ9-2;C9J5W5;C9JRV9;C9J0F6	Q9GZZ9;E7EQ61;E7EWE1;Q9GZZ9-2;C9J5W5;C9JRV9	Ubiquitin-like modifier-activating enzyme 5
NAA50	26.7021	26.6665	26.2225	0	31.859	3875200000	35	E7EQ69;Q9GZZ1;C9J5D1;Q9GZZ1-2;C9JZU6;C9J5J3;B0AZT5;F8WCK0	E7EQ69;Q9GZZ1;C9J5D1;Q9GZZ1-2;C9JZU6;C9J5J3;B0AZT5	N-alpha-acetyltransferase 50
TANK	21.2878	21.4766	19.9616	0	5.3529	183190000	2	Q92844;H7BZ28;H7C3L4;E7EQA9	Q92844;H7BZ28;H7C3L4;E7EQA9	TRAF family member-associated NF-kappa-B activator
TSEN34	22.4988	23.5863	23.0667	0	16.864	507710000	17	Q9BSV6;E7EQB3;B0V3J0;A9C4B9	Q9BSV6;E7EQB3;B0V3J0;A9C4B9	tRNA-splicing endonuclease subunit Sen34
HMGB3	27.7017	28.1751	27.1014	0	26.319	5157300000	28	O15347;E9PES6;E7ES08;E7EQU1	O15347;E9PES6;E7ES08;E7EQU1	High mobility group protein B3
SYNJ2	20.7534	21.0752	19.3909	0	28.894	435330000	11	O15056;E7ER60;O15056-2;O15056-3;X6R647	O15056;E7ER60;O15056-2;O15056-3;X6R647	Synaptojanin-2
RABGEF1	20.0727	20.5491	18.4736	0	6.1564	130330000	7	Q9UJ41;E9PFK9;E7ERJ8;Q9UJ41-2;Q9UJ41-4;Q9UJ41-3	Q9UJ41;E9PFK9;E7ERJ8;Q9UJ41-2;Q9UJ41-4;Q9UJ41-3	Rab5 GDP/GTP exchange factor
MAST2	16.9999	17.5144	18.013	0.00067397	3.5882	68129000	2	Q6P0Q8;E7ERL6;Q6P0Q8-2;V9GXZ1	Q6P0Q8;E7ERL6;Q6P0Q8-2;V9GXZ1	Microtubule-associated serine/threonine-protein kinase 2
MFSD8	22.7278	19.996	19.1227	0	6.4498	172820000	3	Q8NHS3;E7ERQ4	Q8NHS3;E7ERQ4	Major facilitator superfamily domain-containing protein 8
ZC3H18	23.2488	23.0416	21.6503	0	26.437	1358300000	22	E7ERS3;Q86VM9;Q86VM9-2;H3BP01;H3BRH3;H3BRN6;H3BPD0	E7ERS3;Q86VM9;Q86VM9-2	Zinc finger CCCH domain-containing protein 18
DST	21.0206	20.6613	18.8855	0	115.63	2392800000	57	Q03001;E9PEB9;E7ERU0;E9PHM6;F8W9J4;Q03001-8;F6QMI7;E7ETB9;Q03001-13;Q03001-9;Q03001-3;Q6P0N6;Q5T0V7;H0YC65	Q03001;E9PEB9;E7ERU0;E9PHM6;F8W9J4;Q03001-8	Dystonin
ZNF609	20.0504	19.7317	16.5287	0.002869	2.7048	20565000	2	O15014;E7ERY8	O15014;E7ERY8	Zinc finger protein 609
MAEA	21.5763	19.5971	20.3458	0	12.671	120810000	7	Q7L5Y9;Q7L5Y9-2;E7ESC7;Q7L5Y9-3;D6RIB6;B4DQT1;B4DVN3;Q7L5Y9-4;D6RE80;D6RDW4;D6REW7;Q7L5Y9-5;D6R8Z3;D6RA86;D6RID6	Q7L5Y9;Q7L5Y9-2;E7ESC7;Q7L5Y9-3;D6RIB6;B4DQT1;B4DVN3;Q7L5Y9-4;D6RE80;D6RDW4;D6REW7;Q7L5Y9-5	Macrophage erythroblast attacher
SDC2	25.6782	25.5591	23.9403	0	25.428	1771700000	19	P34741;E7ESK6;E9PBI9;E5RJB8;E5RHU3	P34741;E7ESK6;E9PBI9;E5RJB8;E5RHU3	Syndecan-2;Syndecan
MRPL22	26.0315	25.2289	23.7278	0	29.441	1812200000	18	Q9NWU5;E7ESL0;J3KQY1;Q9NWU5-2;Q9NWU5-3	Q9NWU5;E7ESL0;J3KQY1;Q9NWU5-2;Q9NWU5-3	39S ribosomal protein L22, mitochondrial
ITGA2	22.0037	21.2663	20.6729	0	19.063	443150000	6	E7ESP4;E7EMF1;E9PB77;D6RG08	E7ESP4;E7EMF1;E9PB77
TMUB2	23.74	22.6289	20.2325	0	6.7176	277090000	4	Q71RG4;K7EKW3;E7ESS3;Q71RG4-2;Q71RG4-3	Q71RG4;K7EKW3;E7ESS3;Q71RG4-2;Q71RG4-3	Transmembrane and ubiquitin-like domain-containing protein 2
ARHGAP21	16.739	17.7412	18.7293	0.00017908	4.8633	39638000	4	Q5T5U3;E7ESW5;F8W9U9;Q5T5U3-3;H0Y5T2	Q5T5U3;E7ESW5;F8W9U9;Q5T5U3-3	Rho GTPase-activating protein 21
PLEKHG2	18.058	17.4079	16.9767	0.0027152	2.73	9912200	2	Q9H7P9;E7ESZ3;H7BXC7;Q9H7P9-2;Q9H7P9-3	Q9H7P9;E7ESZ3;H7BXC7;Q9H7P9-2;Q9H7P9-3	Pleckstrin homology domain-containing family G member 2
NDUFA10	25.3771	24.9191	23.6983	0	33.014	2236700000	22	O95299;E7ESZ7;O95299-2;Q8N1B9;C9J6X0;H7C2W5;H7C1Y7;H7C2X4	O95299;E7ESZ7;O95299-2;Q8N1B9;C9J6X0	NADH dehydrogenase [ubiquinone] 1 alpha subcomplex subunit 10, mitochondrial
DAGLB	22.3028	21.6667	21.4923	0	21.81	453200000	13	Q8NCG7;E7ET49;Q8NCG7-2;Q8NCG7-4;Q8NCG7-3	Q8NCG7;E7ET49;Q8NCG7-2;Q8NCG7-4	Sn1-specific diacylglycerol lipase beta
ATP7B	23.016	22.6362	21.8531	0	42.416	1749200000	31	P35670;E7ET55;F5H748;P35670-3;P35670-4;P35670-2;F5H562;Q04656;Q04656-4;Q04656-5;Q04656-2;Q04656-3	P35670;E7ET55;F5H748;P35670-3;P35670-4;P35670-2;F5H562	Copper-transporting ATPase 2;WND/140 kDa
EXTL3	20.0002	19.9566	17.8255	0.00698	2.2332	26615000	1	O43909;E7ET85	O43909;E7ET85	Exostosin-like 3
PCM1	24.2946	24.385	22.8674	0	113.52	5508800000	73	E7ETA6;E9PGW9;E7EV93;Q15154-3;E5RGQ4	E7ETA6
DNPEP	23.6723	23.3728	23.9568	0	39.238	1160100000	22	Q9ULA0;E7ETB3;E7EMB6;F8WAN0;C9JBE1;C9J1E2	Q9ULA0;E7ETB3;E7EMB6;F8WAN0;C9JBE1	Aspartyl aminopeptidase
PPP3CA	22.8066	23.2826	23.0625	0	15.265	828440000	9	Q08209;Q08209-2;E7ETC2;Q08209-5;Q08209-3;Q08209-4;E9PPC8;E9PK68;P48454;H0YC26;P48454-2;P48454-3	Q08209;Q08209-2;E7ETC2;Q08209-5;Q08209-3;Q08209-4	Serine/threonine-protein phosphatase 2B catalytic subunit alpha isoform;Serine/threonine-protein phosphatase
BPTF	17.7632	18.337	16.2238	0.00050659	3.6408	50471000	6	Q12830;Q12830-4;Q12830-2;E7ETD6;F5GXF5;J3QQQ8;J3KSK9;E9PE19	Q12830;Q12830-4;Q12830-2;E7ETD6;F5GXF5	Nucleosome-remodeling factor subunit BPTF
CFI	22.4662	21.0805	19.5821	0	10.416	305550000	6	P05156;G3XAM2;E7ETH0;D6R9Z8	P05156;G3XAM2;E7ETH0	Complement factor I;Complement factor I heavy chain;Complement factor I light chain
RPS24	28.9591	28.1969	29.3104	0	24.984	11548000000	33	P62847;E7ETK0;P62847-2;P62847-3;P62847-4	P62847;E7ETK0;P62847-2;P62847-3;P62847-4	40S ribosomal protein S24
FTSJ2	16.899	22.2275	18.201	0.0028704	2.7116	103950000	1	Q9UI43;E7ETL2	Q9UI43;E7ETL2	rRNA methyltransferase 2, mitochondrial
MRPL3	25.7812	24.7309	24.5616	0	29.311	2564100000	28	P09001;H0Y9G6;E7ETU7;D6RC14;E9PF06	P09001;H0Y9G6;E7ETU7;D6RC14;E9PF06	39S ribosomal protein L3, mitochondrial
TPCN2	18.8192	19.0665	18.1775	0.002257	2.8744	37877000	1	Q8NHX9;E7ETX0	Q8NHX9;E7ETX0	Two pore calcium channel protein 2
TCOF1	19.145	19.1224	17.7699	0	5.5219	117930000	3	E7ETY2;Q13428-7;Q13428-6;J3KQ96;Q13428-5;H0YA99	E7ETY2;Q13428-7;Q13428-6;J3KQ96;Q13428-5	Treacle protein
BZW2	26.8784	27.021	26.2241	0	151.57	11316000000	82	Q9Y6E2;E7ETZ4;Q75MG1;B5MCH7;B5MCE7;E7EMS9;E9PFD4;C9JF98;F8WDX8;Q9Y6E2-2	Q9Y6E2;E7ETZ4;Q75MG1;B5MCH7;B5MCE7	Basic leucine zipper and W2 domain-containing protein 2
CSNK2A1;CSNK2A3	28.3815	27.8906	26.8409	0	182.96	16182000000	75	P68400;E7EU96;Q8NEV1;P68400-2;V9GYA2;V9GY80	P68400;E7EU96;Q8NEV1;P68400-2	Casein kinase II subunit alpha;Casein kinase II subunit alpha 3
KAT7	23.8177	22.2553	21.662	0	28.395	1243200000	15	O95251;O95251-2;O95251-4;E7EUP3;O95251-3;O95251-5	O95251;O95251-2;O95251-4;E7EUP3;O95251-3;O95251-5	Histone acetyltransferase KAT7;Histone acetyltransferase
SLBP	21.7427	22.2006	23.1481	0	6.4094	392250000	9	Q14493;H7C4H8;H0YAE8;E7EUV9;F8W8D3;Q14493-2	Q14493;H7C4H8;H0YAE8;E7EUV9;F8W8D3;Q14493-2	Histone RNA hairpin-binding protein
CAPN5	22.879	22.0733	20.9474	0	20.487	548360000	16	O15484;E7EV01;K7EP62;E9PS73	O15484;E7EV01	Calpain-5
SLC45A4	18.417	19.5731	18.6856	0.0037933	2.55	0	1	Q5BKX6;Q5BKX6-3;E7EV90;Q5BKX6-2	Q5BKX6;Q5BKX6-3;E7EV90;Q5BKX6-2	Solute carrier family 45 member 4
MAP4	27.6534	27.334	26.0931	0	323.31	72209000000	251	E7EVA0;P27816;P27816-2;P27816-4;B5MEG9;H7C456;P27816-7	E7EVA0;P27816;P27816-2	Microtubule-associated protein;Microtubule-associated protein 4
ATG16L1	19.7636	22.9916	22.7318	0	18.646	805740000	8	Q676U5;Q676U5-2;E7EVC7;Q676U5-3;Q676U5-4;Q676U5-5;C9JAY7;C9J1B2;C9JK97;F8WAF9;C9J8C6	Q676U5;Q676U5-2;E7EVC7;Q676U5-3;Q676U5-4;Q676U5-5	Autophagy-related protein 16-1
NDST1	18.7304	19.64	17.9592	0	7.7019	136340000	4	P52848;E7EVJ3;P52848-2	P52848;E7EVJ3;P52848-2	Bifunctional heparan sulfate N-deacetylase/N-sulfotransferase 1;Heparan sulfate N-deacetylase 1;Heparan sulfate N-sulfotransferase 1
CYFIP2	19.5766	19.2987	17.325	0.00051379	3.919	94170000	2	E7EVJ5;Q96F07-2;F5H583;Q96F07;E7EW33;H7C229;H0YL50	E7EVJ5;Q96F07-2;F5H583;Q96F07;E7EW33;H7C229	Cytoplasmic FMR1-interacting protein 2
ITPR1	16.4585	17.0257	16.6637	0.0027157	2.7302	45168000	1	Q14643;E7EVP7;Q14643-4;Q14643-3;Q14643-8;Q14643-7;Q14643-5;Q14643-6;Q14643-2;B7ZMI3	Q14643;E7EVP7;Q14643-4;Q14643-3;Q14643-8;Q14643-7;Q14643-5;Q14643-6;Q14643-2;B7ZMI3	Inositol 1,4,5-trisphosphate receptor type 1
SQLE	26.8138	26.3597	25.3775	0	105.23	7605200000	85	Q14534;E7EVQ6;H0YBN7	Q14534;E7EVQ6	Squalene monooxygenase
PRPF31	27.089	26.463	25.6131	0	143.13	7875000000	69	Q8WWY3;E7EVX8;E7ESA8;Q8WWY3-2;Q8WWY3-3;E7EU94;E7ESX0;E7EN72	Q8WWY3;E7EVX8;E7ESA8;Q8WWY3-2;Q8WWY3-3	U4/U6 small nuclear ribonucleoprotein Prp31
EXOC6	22.2344	21.5928	19.4679	0	15.374	462070000	12	Q8TAG9;E7EW84;Q8TAG9-2;F2Z3K0;B1AP46	Q8TAG9;E7EW84;Q8TAG9-2;F2Z3K0	Exocyst complex component 6
FBLIM1	24.1153	24.9127	21.2875	0	12.995	990640000	11	Q8WUP2;E7EWE8;Q8WUP2-3;Q8WUP2-2;D6RAI6;E7EPI5;E7EN81;D6R9V9;D6R9I4;D6RA19	Q8WUP2;E7EWE8;Q8WUP2-3;Q8WUP2-2;D6RAI6;E7EPI5;E7EN81	Filamin-binding LIM protein 1
HYI	21.1834	22.1397	19.992	0	14.778	202760000	7	Q5T013;H0YB18;H0YB70;F6UJY9;J9JIE9;E7EWH8;F6UJY1;Q5T013-2;Q5T013-4;Q5T013-3	Q5T013;H0YB18;H0YB70;F6UJY9;J9JIE9;E7EWH8;F6UJY1;Q5T013-2;Q5T013-4;Q5T013-3	Putative hydroxypyruvate isomerase;Hydroxypyruvate isomerase
NCOA2	18.8014	18.5612	21.2858	0.0075687	2.1698	315470000	3	E7EWM1	E7EWM1
NDUFB5	25.0597	24.8377	25.008	0	9.3697	873010000	11	O43674;E7EWP0;H0Y886;O43674-2	O43674;E7EWP0;H0Y886;O43674-2	NADH dehydrogenase [ubiquinone] 1 beta subcomplex subunit 5, mitochondrial
C16orf62	18.0833	18.308	17.65	0.00051912	4.1327	44611000	1	Q7Z3J2;H3BNX2;F6S1J4;H3BVG8;G5E9I3;F5H7K1;E7EWW0	Q7Z3J2;H3BNX2;F6S1J4;H3BVG8;G5E9I3;F5H7K1;E7EWW0	UPF0505 protein C16orf62
NDUFB9	24.1297	23.9625	23.3386	0.00051582	4.0136	533950000	4	Q9Y6M9;E9PH64;E7EWZ0;E9PF49	Q9Y6M9;E9PH64;E7EWZ0;E9PF49	NADH dehydrogenase [ubiquinone] 1 beta subcomplex subunit 9
EIF4B	27.7834	28.0605	27.1178	0	186.17	23090000000	97	P23588;E7EX17;B4DS13;F8VX11;F8VP89;F8VSC7;F8W0K0;F8VYE9;F8VRU1	P23588;E7EX17;B4DS13	Eukaryotic translation initiation factor 4B
CALD1	29.3906	29.0336	28.1649	0	312.24	48102000000	186	Q05682-3;E7EX44;Q05682-6;Q05682-2;Q05682;C9JEK3	Q05682-3;E7EX44;Q05682-6;Q05682-2;Q05682	Caldesmon
PCCB	24.5862	24.5835	23.0404	0	98.838	2290100000	37	P05166;E9PDR0;E7EX59;P05166-2;E7ETT4;E7EUY3;E7ETT1;C9JQS9;E9PEC3;F8WBI9;E7ENC1;H7C5C9;C9JAW3;C9JVW9;C9JVY9	P05166;E9PDR0;E7EX59;P05166-2;E7ETT4;E7EUY3;E7ETT1;C9JQS9;E9PEC3;F8WBI9	Propionyl-CoA carboxylase beta chain, mitochondrial
DCTN1;DKFZp686E0752	25.894	26.1033	24.5261	0	319.26	12229000000	121	E7EX90;Q14203-3;Q14203;Q14203-6;Q14203-4;Q14203-5;Q14203-2;Q6AWB1;E7EWF7;C9J1B7;C9JZA4;C9JTE5;C9JJN7;C9JJD0;C9JKG6;E9PCY0;C9JUI8	E7EX90;Q14203-3;Q14203;Q14203-6;Q14203-4;Q14203-5;Q14203-2;Q6AWB1	Dynactin subunit 1
RAVER1	27.0862	26.3337	25.2848	0	251.6	8916100000	86	E9PAU2;Q8IY67-2;Q8IY67;K7EQG2;K7EKR9;Q8IY67-3	E9PAU2;Q8IY67-2	Ribonucleoprotein PTB-binding 1
NACA	25.2571	25.6591	24.4697	0	179.24	15087000000	43	E9PAV3;F8VZJ2;H0YHX9;Q13765;E9PAV3-2;F8W0W4;F8W1N5;F8VNW4;F8VZ58	E9PAV3;F8VZJ2;H0YHX9;Q13765;E9PAV3-2;F8W0W4;F8W1N5;F8VNW4	Nascent polypeptide-associated complex subunit alpha, muscle-specific form;Nascent polypeptide-associated complex subunit alpha
GPATCH4	24.3813	24.0124	22.9541	0	33.841	1691800000	27	Q5T3I0;E9PAV9;Q5T3I0-3;F8W895;E9PPY4;F2Z3C6;Q5T3I0-2	Q5T3I0;E9PAV9;Q5T3I0-3;F8W895	G patch domain-containing protein 4
ALYREF	28.9938	28.6587	27.8113	0	263.63	20950000000	54	Q86V81;E9PB61	Q86V81;E9PB61	THO complex subunit 4
EPN2	21.4077	17.4311	21.0856	0	6.5476	185610000	3	O95208;O95208-2;F6PQP6;E9PBC1;I3L2B2;O95208-3	O95208;O95208-2;F6PQP6;E9PBC1;I3L2B2;O95208-3	Epsin-2
AGK	25.7991	25.4104	24.7371	0	84.913	4003400000	26	Q53H12;E9PC15;E9PG39	Q53H12;E9PC15;E9PG39	Acylglycerol kinase, mitochondrial
IL1RL1	23.0812	16.8225	16.7548	0.00098798	3.2035	275100000	1	Q01638;E9PC41;Q01638-3;Q01638-2	Q01638;E9PC41;Q01638-3;Q01638-2	Interleukin-1 receptor-like 1
PAPD5	19.2023	21.7571	20.2682	0	6.5793	219210000	10	Q8NDF8-5;Q8NDF8;H3BQM0;E9PC61;Q8NDF8-3;Q8NDF8-2;Q8NDF8-4	Q8NDF8-5;Q8NDF8;H3BQM0;E9PC61;Q8NDF8-3;Q8NDF8-2	Non-canonical poly(A) RNA polymerase PAPD5
MARK2	23.9706	23.8333	22.4498	0	51.329	2178700000	47	E9PC69;Q7KZI7;Q7KZI7-14;Q7KZI7-15;Q7KZI7-16;Q7KZI7-11;Q7KZI7-8;Q7KZI7-4;E7ETY4;Q7KZI7-13;Q7KZI7-5;Q7KZI7-9;Q7KZI7-12;Q7KZI7-3;Q7KZI7-6;Q7KZI7-10;Q7KZI7-7;Q7KZI7-2;F5H4F6;F5H6N2;F5H4J8	E9PC69;Q7KZI7;Q7KZI7-14;Q7KZI7-15;Q7KZI7-16;Q7KZI7-11;Q7KZI7-8;Q7KZI7-4;E7ETY4;Q7KZI7-13;Q7KZI7-5;Q7KZI7-9;Q7KZI7-12;Q7KZI7-3;Q7KZI7-6;Q7KZI7-10;Q7KZI7-7;Q7KZI7-2	Serine/threonine-protein kinase MARK2
EIF2B5	25.0574	24.9917	23.987	0	44.085	3309000000	40	Q13144;E9PC74;C9JRD9;H7C2X0	Q13144;E9PC74	Translation initiation factor eIF-2B subunit epsilon
MAN2B2	19.9756	18.5109	19.0567	0	7.524	58989000	1	Q9Y2E5;H0YA68;E9PCD7;Q9Y2E5-2	Q9Y2E5;H0YA68;E9PCD7;Q9Y2E5-2	Epididymis-specific alpha-mannosidase;Alpha-mannosidase
GOSR1	25.0324	24.4149	23.9604	0	36.716	1432500000	17	O95249;E9PCW1;K7EJC8;B4DQA8;G5E9T8;O95249-2;F6RU00	O95249;E9PCW1;K7EJC8;B4DQA8;G5E9T8;O95249-2	Golgi SNAP receptor complex member 1
SLC6A19	20.6068	20.4777	16.7724	0.00018195	5.1846	36685000	2	Q695T7;E9PD72	Q695T7;E9PD72	Sodium-dependent neutral amino acid transporter B(0)AT1;Transporter
MYO1B	27.4144	27.1588	25.9039	0	323.31	32010000000	195	O43795;E9PDF6;O43795-2;E7EQD9;H7C2Y7;C9JYW1;C9JUP5;Q9UBC5;C9K0I9;Q8N1T3;Q8N1T3-3;G3V342	O43795;E9PDF6;O43795-2	Unconventional myosin-Ib
PIKFYVE	17.6828	17.1089	17.6058	0.00067317	3.575	44007000	2	Q9Y2I7;E9PDH4	Q9Y2I7;E9PDH4	1-phosphatidylinositol 3-phosphate 5-kinase
LAD1	24.1749	23.531	22.8245	0	24.383	1724800000	25	O00515;E9PDI4;H0Y901	O00515;E9PDI4	Ladinin-1
WDR6	22.2398	22.2015	21.4042	0	23.818	760980000	17	Q9NNW5;E9PDU5;E9PBK6	Q9NNW5;E9PDU5	WD repeat-containing protein 6
CDCA2	22.322	21.926	21.284	0	83.57	700310000	30	Q69YH5;E9PEI0	Q69YH5;E9PEI0	Cell division cycle-associated protein 2
ATP11A	21.3776	18.9168	20.2558	0	26.144	282650000	9	P98196;H0Y547;E9PEJ6;H0Y8F0	P98196;H0Y547;E9PEJ6	Probable phospholipid-transporting ATPase IH;Phospholipid-transporting ATPase
ING5	23.832	23.2943	16.6494	0	13.746	241560000	6	Q8WYH8;E9PEN0;Q8WYH8-2	Q8WYH8;E9PEN0;Q8WYH8-2	Inhibitor of growth protein 5
NRP1	23.8788	24.1628	23.164	0	44.931	2331800000	25	O14786;E9PEP6;E7EX60;Q5T7F0;O14786-3;O14786-2;Q5JWQ4;Q5JWQ6;Q5JWQ2;V9GYL7;H0Y4A0	O14786;E9PEP6;E7EX60;Q5T7F0;O14786-3;O14786-2;Q5JWQ4;Q5JWQ6	Neuropilin-1
ZFY;ZFX	21.263	19.8854	17.2897	0.0011506	3.1786	142460000	2	P08048;P17010;E9PEP7;P17010-2;P08048-2;P08048-3;P17010-3	P08048;P17010;E9PEP7;P17010-2;P08048-2;P08048-3;P17010-3	Zinc finger Y-chromosomal protein;Zinc finger X-chromosomal protein
PDPK1;PDPK2P	21.1501	19.9877	16.3639	0	6.4037	87537000	3	O15530;E9PER6;O15530-3;O15530-4;H3BQ10;Q6A1A2;O15530-5;O15530-2	O15530;E9PER6;O15530-3;O15530-4;H3BQ10;Q6A1A2;O15530-5;O15530-2	3-phosphoinositide-dependent protein kinase 1;Putative 3-phosphoinositide-dependent protein kinase 2
KIF3A	20.7836	22.2184	19.3425	0	12.488	316630000	5	Q9Y496;J3KPF9;E9PES4;C9J9X2	Q9Y496;J3KPF9;E9PES4;C9J9X2	Kinesin-like protein KIF3A;Kinesin-like protein
DIAPH1	25.7856	25.7724	25.0685	0	299.97	11439000000	130	O60610;E9PEZ3;H9KV28;O60610-2;E9PHQ0;O60610-3;E7ERW8;E7EMV0;B4E2I7;E5RJ79;H7C2W8	O60610;E9PEZ3;H9KV28;O60610-2;E9PHQ0;O60610-3;E7ERW8;E7EMV0	Protein diaphanous homolog 1
SUMF1	22.8757	21.8702	20.778	0	7.9192	288000000	7	Q8NBK3;E9PF05;Q8NBK3-2;Q8NBK3-4;Q8NBK3-5;F5GXA0;Q8NBK3-3	Q8NBK3;E9PF05;Q8NBK3-2;Q8NBK3-4;Q8NBK3-5;F5GXA0;Q8NBK3-3	Sulfatase-modifying factor 1
HADH	28.764	27.7105	27.1534	0	89.464	14548000000	66	Q16836;E9PF18;Q16836-3;Q16836-2	Q16836;E9PF18;Q16836-3;Q16836-2	Hydroxyacyl-coenzyme A dehydrogenase, mitochondrial
TBL2	26.1692	25.4929	25.3004	0	57.973	5629800000	42	Q9Y4P3;E9PF19;F8WCR3;F8WDI9	Q9Y4P3;E9PF19	Transducin beta-like protein 2
ACYP2	20.8142	20.84	20.2013	0.0049992	2.3663	27744000	2	P14621;U3KPX1;U3KPX8;E9PF46;F8WA34;U3KQL2	P14621;U3KPX1;U3KPX8;E9PF46;F8WA34;U3KQL2	Acylphosphatase-2;Acylphosphatase
PPP2R5D	24.7047	24.0732	23.3076	0	35.096	2076300000	35	Q14738;E9PFR3;Q14738-2;Q14738-3;H0Y8C4;H7C5Q9;H0YJ49;H0YJ35	Q14738;E9PFR3;Q14738-2;Q14738-3;H0Y8C4	Serine/threonine-protein phosphatase 2A 56 kDa regulatory subunit delta isoform
MANBA	20.1211	20.0676	17.8254	0	6.7131	121180000	4	O00462;E9PFW2	O00462;E9PFW2	Beta-mannosidase
AAK1	23.3615	23.7128	22.4171	0	48.391	1522100000	30	Q2M2I8;E9PG46;Q2M2I8-2;K4DI97	Q2M2I8;E9PG46;Q2M2I8-2	AP2-associated protein kinase 1
PTPRK	22.4684	23.0555	21.8933	0	51.383	1634000000	28	Q5TG12;E9PGC5;Q15262-2;Q15262-3;Q15262-4;Q15262;H0Y6P5;H0Y6V4;H0YDP9;E9PRW2	Q5TG12;E9PGC5;Q15262-2;Q15262-3;Q15262-4;Q15262	Protein-tyrosine-phosphatase;Receptor-type tyrosine-protein phosphatase kappa
MAP1A	19.4854	19.4465	19.3242	0	8.1986	268280000	8	P78559;E9PGC8;P78559-2	P78559;E9PGC8;P78559-2	Microtubule-associated protein 1A;MAP1A heavy chain;MAP1 light chain LC2
EIF4G1	22.5485	21.6588	21.3406	0.00018242	5.2684	922190000	5	E9PGM1;C9J987	E9PGM1
RBM6	23.1929	22.9431	21.0473	0	19.84	1792500000	24	P78332;E9PGM9;F8WCA5;P78332-2;B4E0G6;F8WF63;C9J250;C9JSL1	P78332;E9PGM9;F8WCA5;P78332-2	RNA-binding protein 6
SERPING1	22.8853	22.3094	21.2568	0	38.203	446420000	10	P05155;E9PGN7;P05155-2;P05155-3;H9KV48	P05155;E9PGN7;P05155-2;P05155-3;H9KV48	Plasma protease C1 inhibitor
SLC25A44	21.2963	22.0902	20.351	0.00017756	4.651	144730000	3	Q96H78;E9PGQ0	Q96H78;E9PGQ0	Solute carrier family 25 member 44
FNBP1	21.6324	20.7042	21.1717	0	15.945	251730000	11	Q96RU3;E9PGQ4;Q96RU3-2;Q96RU3-4;Q96RU3-3;H0Y7W6;E7EPB7	Q96RU3;E9PGQ4;Q96RU3-2;Q96RU3-4;Q96RU3-3;H0Y7W6	Formin-binding protein 1
TSN	26.2687	26.6123	26.4612	0	50.583	3842800000	29	Q15631;E9PGT1;H7C1D4;Q15631-2	Q15631;E9PGT1;H7C1D4;Q15631-2	Translin
RPS6KA1	19.0653	19.9237	17.8708	0.00018248	5.2696	134680000	4	Q15418;Q15418-2;E9PGT3;E9PRI4;Q15418-3;E9PMM7;E9PAN7;Q5SVM6;O15021;O60307;Q9Y2H9;Q5SVM7;E7EWQ5;J3QT34;O15021-2;O15021-3;O15021-1	Q15418;Q15418-2;E9PGT3;E9PRI4;Q15418-3	Ribosomal protein S6 kinase alpha-1;Ribosomal protein S6 kinase
COPS8	26.6232	26.476	25.3236	0	20.651	2043400000	17	Q99627;E9PGT6;Q99627-2;H7C3S9;F8WEF2	Q99627;E9PGT6;Q99627-2;H7C3S9	COP9 signalosome complex subunit 8
STAU2	24.1543	23.8109	22.5688	0	34.825	1643800000	27	Q9NUL3;E9PH62;Q9NUL3-6;Q9NUL3-2;E5RJN7;F8VPI7;E7EPX0;E7EVJ4;Q9NUL3-8;Q9NUL3-3;Q9NUL3-7;G5EA18;Q9NUL3-4;E7EVI1;E5RJ67;H0YBY0;E5RFK1	Q9NUL3;E9PH62;Q9NUL3-6;Q9NUL3-2;E5RJN7;F8VPI7;E7EPX0;E7EVJ4;Q9NUL3-8;Q9NUL3-3;Q9NUL3-7;G5EA18;Q9NUL3-4;E7EVI1	Double-stranded RNA-binding protein Staufen homolog 2
ZNF451	20.7022	18.9401	19.7601	0	8.1599	221190000	6	Q9Y4E5;E9PH99;Q9Y4E5-2;D6RIA1	Q9Y4E5;E9PH99;Q9Y4E5-2	Zinc finger protein 451
MCCC1	25.8026	25.1122	24.3164	0	88.936	4882000000	40	Q96RQ3;E9PHF7;E9PG35;F5GYT8;G5E9X5	Q96RQ3;E9PHF7;E9PG35;F5GYT8;G5E9X5	Methylcrotonoyl-CoA carboxylase subunit alpha, mitochondrial
POLR3C	22.2892	22.2982	20.5493	0	10.008	466130000	8	Q9BUI4;E9PHH9	Q9BUI4;E9PHH9	DNA-directed RNA polymerase III subunit RPC3
SUN1	25.2803	24.6852	23.6749	0	81.694	4410100000	51	O94901-9;E9PHI4;O94901;O94901-5;O94901-8;O94901-6;H0Y6N5;H0Y742;H7C2K3;O94901-3;O94901-2;O94901-7;H7C019;C9JK55;C9JS54;C9JJU6;C9K051;H7C3X3;C9JR15;O94901-4	O94901-9;E9PHI4;O94901;O94901-5;O94901-8;O94901-6;H0Y6N5;H0Y742;H7C2K3	SUN domain-containing protein 1
SSFA2	21.0399	21.1476	18.6004	0	14.436	428800000	8	P28290;E9PHV5;P28290-2;P28290-3;E7EUL7;H7BZ26	P28290;E9PHV5;P28290-2;P28290-3;E7EUL7	Sperm-specific antigen 2
EPB41L2	21.0757	22.0851	21.3757	0	18.136	570830000	6	E9PHY5;O43491-4;E9PK52;O43491-3;E9PII3;O43491-2;E9PQD2;E9PQN0;E9PRG1;E9PIG0;E9PJP4;E9PPC9;J3KT37;Q9Y2J2-3;Q9Y2J2-4	E9PHY5;O43491-4;E9PK52;O43491-3;E9PII3;O43491-2	Band 4.1-like protein 2
RCE1	23.3867	23.2095	21.531	0.00035423	4.6055	220040000	4	Q9Y256;E9PI08;E9PPV9;E9PKA7	Q9Y256;E9PI08;E9PPV9;E9PKA7	CAAX prenyl protease 2
BRPF3	18.475	18.6896	16.8137	0	6.1386	62817000	2	Q9ULD4;E9PI60;H0Y7I6	Q9ULD4;E9PI60;H0Y7I6	Bromodomain and PHD finger-containing protein 3
MTG1	21.8531	22.513	21.8101	0	24.989	366440000	15	Q9BT17;U3KQ69;E9PI62;E7EVK2;Q9BT17-2	Q9BT17;U3KQ69;E9PI62;E7EVK2;Q9BT17-2	Mitochondrial ribosome-associated GTPase 1;Mitochondrial GTPase 1
NFYC	23.4545	23.4815	22.6511	0	6.7619	421550000	8	Q13952;Q5T6K7;E9PI99;Q5T6K5;Q13952-6;Q13952-7;Q13952-2;Q13952-5;Q13952-3;E9PJA8;E9PQR2;E9PL11;Q13952-4	Q13952;Q5T6K7;E9PI99;Q5T6K5;Q13952-6;Q13952-7;Q13952-2;Q13952-5;Q13952-3	Nuclear transcription factor Y subunit gamma
GSDMD	23.8699	24.0771	23.4723	0	11.536	831080000	10	P57764;E9PIB2;G3V1A6;E9PQ48;E9PNZ0;E9PQR9	P57764;E9PIB2;G3V1A6	Gasdermin-D
MTCH2	24.0102	23.7487	22.8992	0	5.8976	519120000	4	E9PIE4	E9PIE4
NEU1	23.6055	24.3072	23.5992	0	12.409	1244900000	18	Q99519;E9PIF4	Q99519;E9PIF4	Sialidase-1
TP53I11	22.0952	21.4408	17.8856	0.0036387	2.5675	57727000	2	O14683;E9PN66;E9PKN9;E9PS55;E9PMW4;E9PQ46;E9PIN5;E9PIK4;U3KQ32;E9PKZ4;E9PPM1	O14683;E9PN66;E9PKN9;E9PS55;E9PMW4;E9PQ46;E9PIN5;E9PIK4;U3KQ32;E9PKZ4;E9PPM1	Tumor protein p53-inducible protein 11
PHRF1	21.2194	19.0138	18.6119	0.00035436	4.6077	326380000	2	Q9P1Y6;E9PJ24;F8WEF5;Q9P1Y6-2;Q9P1Y6-3	Q9P1Y6;E9PJ24;F8WEF5;Q9P1Y6-2;Q9P1Y6-3	PHD and RING finger domain-containing protein 1
ST5	20.2664	20.8011	18.441	0.0078474	2.1302	189430000	3	P78524;P78524-2;E9PQA9;E9PKN3;E9PJC3;E9PPL2;E9PI58;E9PNM8;H0YDL0;E9PKM1;E9PNX7;E9PKE0;B4DDL8;P78524-3	P78524;P78524-2;E9PQA9;E9PKN3;E9PJC3;E9PPL2;E9PI58;E9PNM8;H0YDL0;E9PKM1;E9PNX7;E9PKE0;B4DDL8;P78524-3	Suppression of tumorigenicity 5 protein
BRMS1	20.7153	21.2859	20.4394	0.00050744	3.6805	85503000	3	Q9HCU9;E9PPD1;E9PJF5;H0YCF7;G5E9I4	Q9HCU9;E9PPD1;E9PJF5;H0YCF7;G5E9I4	Breast cancer metastasis-suppressor 1
ACOT8	23.3133	22.3157	22.3566	0	7.4042	439620000	9	O14734;E9PJN0;Q9BR14;E9PMC4;E9PIS4;H7C5A7;H0Y698;F6VBM3;E9PRD4	O14734;E9PJN0;Q9BR14;E9PMC4;E9PIS4;H7C5A7	Acyl-coenzyme A thioesterase 8
SNX15	22.0549	20.9248	19.6989	0.0048544	2.3943	126500000	0	Q9NRS6;E9PK26;E9PMW6;Q9NRS6-2	Q9NRS6;E9PK26;E9PMW6;Q9NRS6-2	Sorting nexin-15
SCYL1	24.2668	24.5655	23.9391	0	73.959	3005700000	48	Q96KG9;Q96KG9-2;E9PS17;E9PK59;Q96KG9-3;Q96KG9-4;Q96KG9-5;Q96KG9-6;E9PPN3;H0YCI6;H0YDH0	Q96KG9;Q96KG9-2;E9PS17;E9PK59;Q96KG9-3;Q96KG9-4;Q96KG9-5;Q96KG9-6;E9PPN3	N-terminal kinase-like protein
PLEKHA7	20.8415	18.9089	17.2719	0	16.973	172010000	7	Q6IQ23;E9PKC0;Q6IQ23-2;H0YDE2;Q6IQ23-3;E9PL74;E9PIK1	Q6IQ23;E9PKC0;Q6IQ23-2;H0YDE2;Q6IQ23-3	Pleckstrin homology domain-containing family A member 7
PPP6R3	25.2433	25.4912	24.6446	0	199.42	6802500000	86	Q5H9R7;H7BXH2;E9PKF6;Q5H9R7-6;Q5H9R7-2;Q5H9R7-5;Q5H9R7-4;Q5H9R7-3;E9PQP7;H0YEN2;E9PNN8;E9PK08;H0YDW1;H0YEV0;E9PJD8;E9PKG4;H0YDK9	Q5H9R7;H7BXH2;E9PKF6;Q5H9R7-6;Q5H9R7-2;Q5H9R7-5;Q5H9R7-4;Q5H9R7-3;E9PQP7;H0YEN2	Serine/threonine-protein phosphatase 6 regulatory subunit 3
RELA	23.9406	24.0636	23.0536	0	36.712	1261200000	22	Q04206;Q2TAM5;E9PKH5;Q04206-3;Q04206-2;E9PKV4;Q04206-4;E9PI38;E9PQS6;E9PMD5;E9PNV4;E9PM47;E9PNK5;E9PJR1;E9PRX2;E9PN69	Q04206;Q2TAM5;E9PKH5;Q04206-3;Q04206-2;E9PKV4;Q04206-4;E9PI38;E9PQS6	Transcription factor p65
UBTF	26.369	25.5914	24.6076	0	73.773	7250400000	72	P17480;P17480-2;E9PKP7;E9PMM2;E9PLT2;H0YDH7	P17480;P17480-2;E9PKP7	Nucleolar transcription factor 1
CCDC90B	21.1788	21.3292	17.821	0	9.0261	90155000	2	Q9GZT6;E9PPJ7;H0YF06;J3KN19;E9PKQ5;Q9GZT6-2	Q9GZT6;E9PPJ7;H0YF06;J3KN19;E9PKQ5;Q9GZT6-2	Coiled-coil domain-containing protein 90B, mitochondrial
TMEM123	27.3704	26.8114	25.4849	0.00099059	3.2486	1750800000	5	Q8N131;E9PKT4;Q8N131-2	Q8N131;E9PKT4;Q8N131-2	Porimin
TTC9C	20.7696	19.3713	21.5728	0.0037843	2.5024	15597000	1	Q8N5M4;H0YDR3;E9PKV8	Q8N5M4;H0YDR3;E9PKV8	Tetratricopeptide repeat protein 9C
CLP1	24.5109	24.1949	23.8952	0	11.978	1514700000	16	Q92989;E9PL17;Q92989-2;E9PJM4;E9PKV5	Q92989;E9PL17;Q92989-2;E9PJM4	Polyribonucleotide 5-hydroxyl-kinase Clp1
PDE4DIP	21.4547	20.7666	16.2849	0	9.6865	260850000	5	Q5VU43-2;E9PL24;Q5VU43;E9PQG4;A0A075B749;Q5VU43-6;Q5VU43-7;Q5VU43-3;Q5VU43-4	Q5VU43-2;E9PL24;Q5VU43;E9PQG4;A0A075B749;Q5VU43-6;Q5VU43-7;Q5VU43-3;Q5VU43-4	Myomegalin
C11orf98	26.4416	26.0604	25.6589	0	5.9323	902170000	6	E9PRG8;E9PLD3	E9PRG8;E9PLD3	Uncharacterized protein C11orf98
PTDSS2	21.3376	21.8381	17.4097	0.00083584	3.4868	161760000	3	Q9BVG9;E9PS47;E9PLE4	Q9BVG9;E9PS47;E9PLE4	Phosphatidylserine synthase 2
EIF1AD	22.4336	23.9596	21.3464	0	5.764	237690000	3	Q8N9N8;E9PS30;E9PLI6;E9PS76;E9PQD0	Q8N9N8;E9PS30;E9PLI6;E9PS76;E9PQD0	Probable RNA-binding protein EIF1AD
NPEPPS	25.3866	25.6811	24.8152	0	152.66	7604300000	83	P55786;E9PLK3;P55786-2;A6NEC2;A6NEC2-2;H0YDG0;E9PP11;E9PJY4;E9PJ74;E9PPD4;H0YCQ5;E9PRQ5;A6NEC2-3;E9PJF9;E9PPZ2;E9PI82	P55786;E9PLK3;P55786-2	Puromycin-sensitive aminopeptidase
MVB12A	22.0826	23.1617	20.6558	0	6.1765	212480000	6	Q96EY5;E9PLL0;E9PQA6;Q96EY5-3;M0QZK6;E9PLZ8;Q96EY5-2	Q96EY5;E9PLL0;E9PQA6;Q96EY5-3;M0QZK6;E9PLZ8;Q96EY5-2	Multivesicular body subunit 12A
TM7SF2	18.343	22.4728	17.5372	0.00017999	4.9629	64028000	2	O76062;H0YEN6;E9PS18;E9PLS9	O76062;H0YEN6;E9PS18;E9PLS9	Delta(14)-sterol reductase
TYK2	18.9424	19.7151	18.1011	0	9.8601	117780000	4	P29597;E9PM19;E9PPF2;K7EJR6;H0YE41	P29597;E9PM19;E9PPF2	Non-receptor tyrosine-protein kinase TYK2;Tyrosine-protein kinase
SIRT3	21.3518	19.7865	19.4163	0	10.747	125460000	6	Q9NTG7;E9PM75;E9PK80;E9PN58;Q9NTG7-2;E9PNA0	Q9NTG7;E9PM75;E9PK80;E9PN58;Q9NTG7-2;E9PNA0	NAD-dependent protein deacetylase sirtuin-3, mitochondrial
REPS1	22.4644	22.7705	21.5092	0	25.892	777960000	11	Q96D71;E9PMG1;Q96D71-2;Q96D71-4;Q96D71-3;H0YDT0;H0YE89;F2Z3L2;Q8NFH8;H0YCR2;Q8NFH8-3;Q8NFH8-2;Q8NFH8-4	Q96D71;E9PMG1;Q96D71-2;Q96D71-4;Q96D71-3;H0YDT0	RalBP1-associated Eps domain-containing protein 1
WRAP53	20.072	18.9798	17.0117	0.00051805	4.0901	30766000	2	Q9BUR4;E9PMG4	Q9BUR4;E9PMG4	Telomerase Cajal body protein 1
BIRC2	19.8514	20.4595	18.2346	0.00035186	4.4392	95402000	3	Q13490;E9PMH5;Q13490-2;E9PIW1;E9PI77	Q13490;E9PMH5;Q13490-2;E9PIW1	Baculoviral IAP repeat-containing protein 2
CYB5R2	19.525	20.3532	20.079	0.00034947	4.305	69273000	5	Q6BCY4;E9PMI2;Q6BCY4-2;E9PRM4;E9PIV9;E9PQW2	Q6BCY4;E9PMI2;Q6BCY4-2;E9PRM4;E9PIV9;E9PQW2	NADH-cytochrome b5 reductase 2
CLNS1A	26.0089	25.6944	24.7925	0	26.018	1500400000	11	P54105;E9PMI6;J3KN38;E9PJF4;E9PQ83	P54105;E9PMI6;J3KN38;E9PJF4;E9PQ83	Methylosome subunit pICln
FAM118B	21.5472	23.1312	21.3021	0	13.169	328840000	13	Q9BPY3;E9PMJ2;J3KP39;G3V179;E9PIM5;E9PMW3	Q9BPY3;E9PMJ2;J3KP39;G3V179;E9PIM5	Protein FAM118B
PEX16	23.1248	21.3681	21.813	0.00035461	4.6185	402140000	3	Q9Y5Y5;E9PMM3;Q9Y5Y5-2;E9PQW0;E9PMS3;E9PLS4;E9PP98	Q9Y5Y5;E9PMM3;Q9Y5Y5-2;E9PQW0	Peroxisomal membrane protein PEX16
CD151	22.8232	22.7713	21.8997	0.00051608	4.0233	315060000	2	P48509;E9PMR4;E9PRJ3	P48509;E9PMR4;E9PRJ3	CD151 antigen;Tetraspanin
LMO7	27.2537	26.7264	25.6641	0	323.31	31717000000	206	E9PMS6;Q8WWI1-3;Q8WWI1;Q8WWI1-2;Q8WWI1-4;F8WD26;J3KP06;E9PMT2;Q8WWI1-5;E9PMP7;H0Y424;E9PJ10;E9PK58;E9PLU6;H0YE95;U3KQE6;E9PRE3;E9PRJ0	E9PMS6;Q8WWI1-3;Q8WWI1;Q8WWI1-2;Q8WWI1-4;F8WD26;J3KP06;E9PMT2;Q8WWI1-5;E9PMP7;H0Y424	LIM domain only protein 7
ATP5L	26.2156	26.4563	25.4818	0	9.6888	1395600000	12	O75964;E9PN17	O75964;E9PN17	ATP synthase subunit g, mitochondrial
RNASEH2C	23.0873	24.4947	23.2597	0	7.8651	515730000	6	Q8TDP1;H0YEF3;E9PN81;Q8TDP1-2	Q8TDP1;H0YEF3;E9PN81;Q8TDP1-2	Ribonuclease H2 subunit C
NADSYN1	19.1542	19.6278	18.1054	0	5.5499	21063000	4	Q6IA69;E9PNF5;Q6IA69-2	Q6IA69;E9PNF5;Q6IA69-2	Glutamine-dependent NAD(+) synthetase
AAMDC	23.1583	22.5222	17.566	0	10.576	192440000	4	Q9H7C9;E9PNP3;E9PJP1;E9PLK9;K4DI89;E9PR47;Q9H7C9-3;Q9H7C9-2;E9PIQ4	Q9H7C9;E9PNP3;E9PJP1;E9PLK9;K4DI89;E9PR47;Q9H7C9-3;Q9H7C9-2	Mth938 domain-containing protein
TBCEL	19.4708	19.855	17.3743	0	7.3949	36848000	1	Q5QJ74;E9PNS0	Q5QJ74;E9PNS0	Tubulin-specific chaperone cofactor E-like protein
CD59	27.1193	26.0871	24.6972	0	5.331	2367300000	9	P13987;E9PNW4;E9PR17	P13987;E9PNW4;E9PR17	CD59 glycoprotein
ZC3H12C;ZC3H12A;ZC3H12B	21.3518	17.7835	16.7169	0.0028713	2.7119	5170600	1	Q9C0D7;Q5D1E8;Q5HYM0;E9PP00;Q5HYM0-2;Q9C0D7-2	Q9C0D7;Q5D1E8;Q5HYM0;E9PP00;Q5HYM0-2;Q9C0D7-2	Probable ribonuclease ZC3H12C;Ribonuclease ZC3H12A;Probable ribonuclease ZC3H12B
RNF170	21.6789	21.133	17.2908	0.00067385	3.5857	50912000	2	Q96K19-3;Q96K19;E9PP55;Q96K19-5;Q96K19-2	Q96K19-3;Q96K19;E9PP55;Q96K19-5;Q96K19-2	E3 ubiquitin-protein ligase RNF170
C11orf73	23.7989	24.309	24.1935	0	6.7304	405100000	5	Q53FT3;E9PPG8;E9PJB2	Q53FT3;E9PPG8;E9PJB2	Protein Hikeshi
NDUFS8	24.4144	25.214	24.9974	0	15.863	1410300000	17	O00217;E9PPW7;E9PN51;F8W9K7;E9PKH6;H0YDT4	O00217;E9PPW7;E9PN51;F8W9K7;E9PKH6	NADH dehydrogenase [ubiquinone] iron-sulfur protein 8, mitochondrial
NUF2	24.7834	24.0198	23.6628	0	19.103	2115200000	18	Q9BZD4;E9PQC4;B1AQT4;E9PP32;E9PKH1;B1AQT3	Q9BZD4;E9PQC4	Kinetochore protein Nuf2
FNTA	22.7066	24.1333	21.3206	0	21.039	470250000	16	P49354;E9PQP6;P49354-2;B3KVN2;H0YCW1;E9PPM9;E9PN85	P49354;E9PQP6;P49354-2;B3KVN2;H0YCW1	Protein farnesyltransferase/geranylgeranyltransferase type-1 subunit alpha
SMPD1	20.7172	19.7361	16.4695	0.00035242	4.4652	43098000	3	P17405;G3V1E1;E9PQT3;P17405-3;P17405-2;P17405-4;E9PPK6;H0YEP5	P17405;G3V1E1;E9PQT3;P17405-3;P17405-2;P17405-4;E9PPK6;H0YEP5	Sphingomyelin phosphodiesterase
MAPK3	22.5205	20.6004	21.7716	0	7.5856	280940000	6	P27361;P27361-3;E9PQW4;P27361-2;E9PJF0;B3KR49;E9PBK7;H0YEX6;E9PRH7	P27361;P27361-3;E9PQW4;P27361-2;E9PJF0;B3KR49;E9PBK7	Mitogen-activated protein kinase 3;Mitogen-activated protein kinase
FAU	30.8228	30.3064	29.9134	0	8.6714	11055000000	23	P62861;E9PR30	P62861;E9PR30	40S ribosomal protein S30
UVRAG	20.5909	20.2853	17.7723	0	5.3104	148090000	5	Q9P2Y5;E9PR71;E9PK00;Q9P2Y5-2	Q9P2Y5;E9PR71	UV radiation resistance-associated gene protein
SETDB1	19.8634	20.261	18.6116	0	19.228	186710000	5	Q15047;E9PRF4;Q15047-3;E9PQM8;X6R732;Q15047-2	Q15047;E9PRF4;Q15047-3;E9PQM8	Histone-lysine N-methyltransferase SETDB1
ARL14EP	21.5793	21.1316	20.0213	0.0066729	2.2418	104570000	3	Q8N8R7;E9PRK7	Q8N8R7;E9PRK7	ARL14 effector protein
SLC22A18	25.613	24.0199	24.6284	0	14.901	1163500000	11	Q96BI1;E9PRM7	Q96BI1;E9PRM7	Solute carrier family 22 member 18
UBXN1	25.6633	25.9998	25.5191	0	48.428	2975300000	34	Q04323;E9PRQ7;E9PJ81;Q04323-2;E9PS08	Q04323;E9PRQ7;E9PJ81;Q04323-2	UBX domain-containing protein 1
WEE1	21.4485	20.0352	17.9383	0	9.5449	129900000	3	P30291;E9PRU3;P30291-2;E9PQ51;H0YEJ2	P30291;E9PRU3;P30291-2;E9PQ51	Wee1-like protein kinase
SLCO2B1	20.9391	16.6182	16.799	0.00051876	4.1063	58551000	4	O94956;E9PRW4;O94956-2;O94956-4;O94956-3	O94956;E9PRW4;O94956-2;O94956-4;O94956-3	Solute carrier organic anion transporter family member 2B1
SAAL1	22.5573	22.7018	20.885	0	15.983	401270000	8	Q96ER3;J3KND1;E9PRZ1;H0YCN7;H0YEK5;E9PMD2;E9PL53	Q96ER3;J3KND1;E9PRZ1;H0YCN7;H0YEK5;E9PMD2	Protein SAAL1
IFITM3	24.057	23.7515	22.3327	0	9.705	240680000	3	Q01628;E9PS44	Q01628;E9PS44	Interferon-induced transmembrane protein 3
FIBP	22.4895	22.3196	21.9509	0	8.3231	431580000	8	O43427;E9PSD3;O43427-2;E9PJW6;H0YCE7	O43427;E9PSD3;O43427-2;E9PJW6	Acidic fibroblast growth factor intracellular-binding protein
TM9SF1;CHMP4A	25.1262	24.976	23.9484	0	76.072	3647300000	46	E9PSI1;O15321;E9PQ80;E9PMQ9;O15321-2;E9PQI5;E9PL78;E9PJM1;E9PQY7;E9PS99;G3V1B9;E9PNW2;E9PJC4;H0YI89	E9PSI1;O15321;E9PQ80;E9PMQ9;O15321-2	Transmembrane 9 superfamily member 1
XPA	23.2801	23.7561	21.968	0	14.318	315720000	6	P23025;F2Z2T2	P23025;F2Z2T2	DNA repair protein complementing XP-A cells
TRMT2A	21.3397	22.3598	21.2206	0	13.096	445080000	13	Q8IZ69;F2Z2W7;Q8IZ69-2;H7C100;H7BZZ4	Q8IZ69;F2Z2W7;Q8IZ69-2	tRNA (uracil-5-)-methyltransferase homolog A
NME4	23.3079	23.8784	21.9513	0.00018155	5.1529	382200000	5	O00746;Q4TT34;F2Z2X0;H0Y6J0;O00746-2	O00746;Q4TT34;F2Z2X0;H0Y6J0;O00746-2	Nucleoside diphosphate kinase, mitochondrial;Nucleoside diphosphate kinase
XPO4	21.6939	22.162	20.9651	0	33.555	665160000	18	Q9C0E2;F2Z2X4	Q9C0E2;F2Z2X4	Exportin-4
GTF2H3	22.7231	23.533	20.4567	0	7.3173	314320000	7	Q13889;F5GWD3;Q13889-2;H0YFF7;F5H6X0;F5GXG6;F5GX35;F5H4K7	Q13889;F5GWD3;Q13889-2;H0YFF7;F5H6X0;F5GXG6;F5GX35;F5H4K7	General transcription factor IIH subunit 3
PITPNA	24.9166	24.4475	23.1826	0	25.358	1257900000	13	Q00169;F5GWE5;I3L4H1;I3L471;I3L4U7;I3L3W1;I3L2X8;I3L4C0;I3L459	Q00169;F5GWE5;I3L4H1;I3L471;I3L4U7	Phosphatidylinositol transfer protein alpha isoform
ADA	18.1282	18.5487	17.0678	0.0098919	1.981	3159700	1	P00813;F5GYD4;F5GXW0;F5GWI4	P00813;F5GYD4;F5GXW0;F5GWI4	Adenosine deaminase
ROBO3	18.8687	20.7443	19.9969	0.0048528	2.391	336440000	2	Q96MS0;F5GWJ5;Q96MS0-2	Q96MS0;F5GWJ5;Q96MS0-2	Roundabout homolog 3
PIK3C2B	16.9125	16.7866	15.7259	0.0019503	3.0088	29106000	1	O00750;F5GWN5	O00750;F5GWN5	Phosphatidylinositol 4-phosphate 3-kinase C2 domain-containing subunit beta
KRT17	20.876	21.3029	20.1675	0	7.4914	604470000	9	F5GWP8	F5GWP8
CLASP1	22.3131	21.8139	20.721	0	41.82	1258200000	39	Q7Z460;Q7Z460-3;Q7Z460-2;F8WA11;Q7Z460-4;F5GWS0;H0Y5T1;C9JP76;C9J151;H0YHV8	Q7Z460;Q7Z460-3;Q7Z460-2;F8WA11;Q7Z460-4;F5GWS0	CLIP-associating protein 1
ORAOV1	19.3404	20.2704	18.859	0.00099354	3.2964	19142000	1	Q8WV07;H3BPK6;F5GWS9;F5GZY6;F5GXG7	Q8WV07;H3BPK6;F5GWS9;F5GZY6;F5GXG7	Oral cancer-overexpressed protein 1
WNK1	23.834	24.6976	23.6812	0	80.18	4180000000	65	Q9H4A3;Q9H4A3-5;F5GWT4;F5H2M7;Q9H4A3-2;Q9H4A3-6;Q9H4A3-7;Q9H4A3-4;F6UYG0;Q96J92;K7ENT7;Q96J92-3;H0YH68;Q96J92-2	Q9H4A3;Q9H4A3-5;F5GWT4;F5H2M7;Q9H4A3-2;Q9H4A3-6;Q9H4A3-7;Q9H4A3-4	Serine/threonine-protein kinase WNK1
SMAD5;SMAD1	22.6056	22.4818	21.5028	0	15.116	418060000	8	Q99717;F5GWU7;Q15797;H0YAK7;D6RD62;D6RBB4	Q99717;F5GWU7;Q15797	Mothers against decapentaplegic homolog 5;Mothers against decapentaplegic homolog 1
CHD4	27.2108	26.6193	25.6608	0	323.31	34271000000	266	Q14839;F5GWX5;Q14839-2;Q8TDI0;K7EMY3;F2Z2R5;F5H6N4;H7C0J3;F6T542;I3L229;H7C3H7	Q14839;F5GWX5;Q14839-2	Chromodomain-helicase-DNA-binding protein 4
G2E3	20.7575	18.6109	17.4253	0	8.0993	119300000	6	Q7L622;F5GX24;G3V483	Q7L622;F5GX24;G3V483	G2/M phase-specific E3 ubiquitin-protein ligase
KDM4B	18.1146	18.1443	19.9493	0.0084034	2.0475	13340000	2	O94953;F5GX28;O94953-2	O94953;F5GX28;O94953-2	Lysine-specific demethylase 4B
DNMT1	25.5165	25.5594	24.4687	0	158.85	11839000000	127	P26358;P26358-2;F5GX68;P26358-3;K7ENW7;K7EJL0;K7EMU8;K7EIZ6;K7ENQ6;K7EP77;K7ERQ1;K7ELB1	P26358;P26358-2;F5GX68;P26358-3	DNA (cytosine-5)-methyltransferase 1
MPI	20.7857	22.3428	21.3014	0	6.8531	247350000	8	P34949;F5GX71;H3BPB8;H3BMZ9;H3BPP3;H3BP57;H3BT48;H3BUZ9;H3BPM5;H3BQX0;H3BNY8;P34949-2;H3BPU7;H3BU66;H3BN01;H3BT46;B4DYB8	P34949;F5GX71;H3BPB8;H3BMZ9;H3BPP3;H3BP57;H3BT48;H3BUZ9;H3BPM5;H3BQX0;H3BNY8;P34949-2	Mannose-6-phosphate isomerase
RHOF	22.1757	21.6963	20.8694	0.0016287	3.0355	158860000	4	Q9HBH0;F5GXB1;Q9HBH0-2	Q9HBH0;F5GXB1;Q9HBH0-2	Rho-related GTP-binding protein RhoF
ANAPC15	23.4202	22.5743	21.5598	0.00035354	4.556	83089000	4	F5GXB9;F5H2T3;F8WDQ6;F5H3R3;F5H6E4;G5EA39;P60006;P60006-2	F5GXB9;F5H2T3;F8WDQ6;F5H3R3;F5H6E4;G5EA39;P60006;P60006-2	Anaphase-promoting complex subunit 15
TM7SF3	23.2266	18.5309	17.0189	0.0084059	2.0495	147230000	1	Q9NS93;F5H587;F5GXE1;F5H7C5;H0YFW7	Q9NS93;F5H587;F5GXE1;F5H7C5;H0YFW7	Transmembrane 7 superfamily member 3
DIABLO	22.8255	18.9338	21.0336	0.00017918	4.8834	148850000	0	Q9NR28;F5GXT8;F5H796;Q9NR28-2;Q9NR28-3	Q9NR28;F5GXT8;F5H796;Q9NR28-2;Q9NR28-3	Diablo homolog, mitochondrial
DAD1	25.3736	26.8586	25.8182	0	8.9803	1331200000	12	P61803;F5GXX5;F5H895	P61803;F5GXX5;F5H895	Dolichyl-diphosphooligosaccharide--protein glycosyltransferase subunit DAD1
FAM120B	20.2249	19.6005	19.3187	0	5.3609	159430000	5	Q96EK7;F5GY05;Q96EK7-3;Q96EK7-2	Q96EK7;F5GY05;Q96EK7-3;Q96EK7-2	Constitutive coactivator of peroxisome proliferator-activated receptor gamma
MED24	20.52	20.6235	20.093	0	20.746	333360000	13	O75448;F5GY88;O75448-2;F5H5K2;B4DDR8;B9TX62;E9PFL1	O75448;F5GY88;O75448-2;F5H5K2;B4DDR8	Mediator of RNA polymerase II transcription subunit 24
REXO2	24.7975	24.3736	16.3447	0	7.1821	690600000	6	Q9Y3B8;F5GYG5;H0YGR4;Q9Y3B8-2;Q9Y3B8-3;Q9BTR4;F5H6P8;H0YG37;H0YH58;F5H784;F5GX07;H0YG83;H0YG54;F5H7P1	Q9Y3B8;F5GYG5;H0YGR4;Q9Y3B8-2;Q9Y3B8-3;Q9BTR4;F5H6P8;H0YG37;H0YH58;F5H784;F5GX07;H0YG83;H0YG54	Oligoribonuclease, mitochondrial
SDHAF2	24.1899	24.4513	23.4296	0	8.9727	593470000	7	Q9NX18;F5GYJ5	Q9NX18;F5GYJ5	Succinate dehydrogenase assembly factor 2, mitochondrial
STRN4	23.4162	24.6012	22.9008	0	23.829	1323400000	15	Q9NRL3;F5GYK2;Q9NRL3-3;M0R0P4;Q9NRL3-2;M0QXN2;M0R2A7;M0QYS2;M0R0W8;M0R317;R4GN16;M0QZM0	Q9NRL3;F5GYK2;Q9NRL3-3;M0R0P4;Q9NRL3-2	Striatin-4
OTUB1	25.6086	26.442	25.6051	0	105.97	3070500000	34	Q96FW1;F5GYN4;J3KR44;F5GYJ8;F5H6Q1;F5H3F0;Q96FW1-2	Q96FW1;F5GYN4;J3KR44;F5GYJ8;F5H6Q1	Ubiquitin thioesterase OTUB1
ATP6V0D1	24.1833	24.49	23.8086	0	42.36	979530000	16	P61421;F5GYQ1;J3QL14;R4GN72;H3BQJ1;H3BQB4;H3BSG7	P61421;F5GYQ1;J3QL14;R4GN72;H3BQJ1	V-type proton ATPase subunit d 1
MEIS3;MEIS1;MEIS2;MEIS3P2;MEIS3P1	20.1406	20.0834	20.9929	0	6.0231	119040000	5	Q99687;O00470;O14770;H0YMX5;U3KQV2;F5GYS8;H0YNY8;U3KPR8;H3BLU4;H0YNA8;O14770-5;O14770-6;Q99687-3;O14770-7;O14770-8;O14770-3;O14770-2;Q99687-2;O00470-2;O14770-4;A8K0S8;H0YKE5;H0YKN2;E9PDC4;U3KQ95;U3KQI2;A6NDR6	Q99687;O00470;O14770;H0YMX5;U3KQV2;F5GYS8;H0YNY8;U3KPR8;H3BLU4;H0YNA8;O14770-5;O14770-6;Q99687-3;O14770-7;O14770-8;O14770-3;O14770-2;Q99687-2;O00470-2;O14770-4;A8K0S8;H0YKE5;H0YKN2;E9PDC4;U3KQ95;U3KQI2;A6NDR6	Homeobox protein Meis3;Homeobox protein Meis1;Homeobox protein Meis2;Putative homeobox protein Meis3-like 2;Putative homeobox protein Meis3-like 1
ARL6IP4	23.2664	23.1533	21.3996	0	63.037	528630000	12	Q66PJ3;Q66PJ3-2;Q66PJ3-7;Q66PJ3-3;F5GYV5;H7BZV4;F8WCT1;Q66PJ3-4;F5H7X4;F8WEP2;Q66PJ3-5	Q66PJ3;Q66PJ3-2;Q66PJ3-7;Q66PJ3-3;F5GYV5;H7BZV4;F8WCT1;Q66PJ3-4;F5H7X4	ADP-ribosylation factor-like protein 6-interacting protein 4
ARSE	24.4093	23.6733	22.766	0	51.356	1378300000	25	P51690;F5H324;F5GYY5;C9J5G7	P51690;F5H324;F5GYY5	Arylsulfatase E
CAMKK2	18.9136	20.5545	17.8924	0.00067306	3.575	0	2	Q96RR4;Q96RR4-3;F5GZ00;Q96RR4-6;Q96RR4-5;Q96RR4-2;Q96RR4-4;Q96RR4-7	Q96RR4;Q96RR4-3;F5GZ00;Q96RR4-6;Q96RR4-5;Q96RR4-2;Q96RR4-4;Q96RR4-7	Calcium/calmodulin-dependent protein kinase kinase 2
GLTP	19.8202	19.1503	18.998	0.0098904	1.9801	15475000	1	Q9NZD2;F5GZ49;F5H0U5	Q9NZD2;F5GZ49;F5H0U5	Glycolipid transfer protein
DTL	18.8423	18.9993	17.9467	0	7.7405	111040000	7	Q9NZJ0;F5GZ90;Q9NZJ0-2	Q9NZJ0;F5GZ90;Q9NZJ0-2	Denticleless protein homolog
CCDC53	22.4233	21.263	18.6086	0	7.1349	95920000	3	Q9Y3C0;H0YGN0;F5GZ97;F5GWI9;F5GXZ7	Q9Y3C0;H0YGN0;F5GZ97;F5GWI9;F5GXZ7	WASH complex subunit CCDC53
SYT7	18.473	19.962	19.1236	0.00051107	3.7911	45756000	3	O43581;F5GZC2;F5H6C1;F5H1N2;F5H126;O43581-2	O43581;F5GZC2;F5H6C1;F5H1N2;F5H126;O43581-2	Synaptotagmin-7
EXTL2	23.4395	22.4394	21.8285	0	7.5139	320630000	5	Q9UBQ6;F5GZK1;C9IYF5;C9JEG3	Q9UBQ6;F5GZK1;C9IYF5;C9JEG3	Exostosin-like 2;Processed exostosin-like 2
DCP1B	20.7342	20.1269	18.7215	0	8.8592	126520000	5	Q8IZD4;F5GZK9;Q8IZD4-2	Q8IZD4;F5GZK9;Q8IZD4-2	mRNA-decapping enzyme 1B
SLC3A2	28.1642	27.6893	26.9146	0	141.33	25474000000	118	P08195;F5GZS6;P08195-3;J3KPF3;P08195-4;P08195-2;F5GZI0;H0YFS2;F5H0E2;F5H867;H0YFX4	P08195;F5GZS6;P08195-3;J3KPF3;P08195-4;P08195-2	4F2 cell-surface antigen heavy chain
GABARAPL1	27.1708	26.6337	26.1918	0	10.038	1323600000	12	Q9H0R8;F5GZY7;Q9H0R8-2;H3BSM5	Q9H0R8;F5GZY7;Q9H0R8-2	Gamma-aminobutyric acid receptor-associated protein-like 1
ALKBH2	20.7539	21.2878	18.3532	0.00083126	3.3755	51940000	0	Q6NS38;F5GZZ0;S4R3T5;F5H5X2;Q6NS38-2	Q6NS38;F5GZZ0;S4R3T5;F5H5X2;Q6NS38-2	Alpha-ketoglutarate-dependent dioxygenase alkB homolog 2
GPHN	21.2088	21.4625	18.3119	0	9.6748	283890000	6	Q9NQX3;Q9NQX3-2;F5H039;H0YJ30;G3V582;H0YJR5	Q9NQX3;Q9NQX3-2;F5H039;H0YJ30;G3V582	Gephyrin;Molybdopterin adenylyltransferase;Molybdopterin molybdenumtransferase
	25.9817	25.8106	24.9708	0	38.046	2386300000	26	F5H0B0;H0YC42;H0YC44;P55327-8;U3KQQ8	F5H0B0
PAAF1	21.9804	22.7376	21.5978	0	8.1973	338300000	8	Q9BRP4;F5H0C4;Q9BRP4-2;F5H103;F5H3I1;Q9BRP4-3;F5H3E9;H0YGB1;F5H5D4;F5H0F7	Q9BRP4;F5H0C4;Q9BRP4-2;F5H103;F5H3I1;Q9BRP4-3	Proteasomal ATPase-associated factor 1
HNF1A	25.0294	25.0247	23.2376	0	116.78	1458800000	23	P20823;U3KQS6;F5H0K0;P20823-3;P20823-2;P20823-7;H0YND5;P20823-5;P20823-4;P20823-6;P20823-8;F5H3Z5	P20823;U3KQS6;F5H0K0;P20823-3;P20823-2;P20823-7;H0YND5;P20823-5;P20823-4;P20823-6	Hepatocyte nuclear factor 1-alpha
CLASRP	21.777	20.7324	20.9114	0	6.7042	183190000	3	Q8N2M8;F5H0Q6;Q8N2M8-3;K7EKC9;K7EM61;Q8N2M8-4	Q8N2M8;F5H0Q6;Q8N2M8-3;K7EKC9;K7EM61;Q8N2M8-4	CLK4-associating serine/arginine rich protein
TUT1	21.2076	21.6718	19.536	0	14.097	293270000	11	Q9H6E5;F5H0R1;H3BRB1;C9JBX0	Q9H6E5;F5H0R1;H3BRB1	Speckle targeted PIP5K1A-regulated poly(A) polymerase
NOL8	21.9459	22.0009	21.5546	0	31.537	790010000	23	Q76FK4;F8WE42;F5H101;Q76FK4-4;Q76FK4-2;F5GWN9;F5GXV1;F5H532;F5H0I5;F5H8B8;F5H692;F5H797	Q76FK4;F8WE42;F5H101;Q76FK4-4;Q76FK4-2;F5GWN9	Nucleolar protein 8
RRN3	19.2326	18.7021	17.6618	0.00018238	5.2532	61870000	3	Q9NYV6;F5H148;H3BMT1;Q9NYV6-2;Q9NYV6-3	Q9NYV6;F5H148;H3BMT1;Q9NYV6-2;Q9NYV6-3	RNA polymerase I-specific transcription initiation factor RRN3
DNAJA4	23.7845	23.5201	24.8957	0	6.3726	1676700000	4	Q8WW22;Q8WW22-2;F5H170;Q8WW22-3;C9JDE6	Q8WW22;Q8WW22-2;F5H170;Q8WW22-3;C9JDE6	DnaJ homolog subfamily A member 4
MSRB3	22.2788	20.5096	17.9114	0.0013104	3.1075	30530000	1	Q8IXL7;Q8IXL7-2;H7C2B7;F5H7C4;F5H6G9;F5H199;H0YFW5	Q8IXL7;Q8IXL7-2;H7C2B7;F5H7C4;F5H6G9;F5H199;H0YFW5	Methionine-R-sulfoxide reductase B3
POLE	21.8752	21.6792	19.9075	0	54.503	1193500000	29	Q07864;F5H1D6;F5H7E4	Q07864;F5H1D6	DNA polymerase epsilon catalytic subunit A;DNA polymerase
KDM5A	20.8203	19.5834	19.392	0	11.171	350110000	10	P29375;F5H1F7;P29375-2;E7EV89;F5H322;F5GZR8	P29375;F5H1F7;P29375-2	Lysine-specific demethylase 5A
ABI1	25.5975	25.6069	24.2114	0	41.027	2810900000	25	F5H1G9;F8WA55;Q8IZP0-10;Q8IZP0-8;Q8IZP0-7;Q8IZP0-11;F8WAL6	F5H1G9;F8WA55;Q8IZP0-10;Q8IZP0-8;Q8IZP0-7;Q8IZP0-11	Abl interactor 1
KIAA1211	19.5489	19.7719	17.1832	0	9.2699	161060000	6	Q6ZU35;F5H1N7	Q6ZU35;F5H1N7	Uncharacterized protein KIAA1211
MPDZ	21.4497	21.3659	20.2235	0	44.346	817700000	28	O75970;F5H1U9;O75970-5;O75970-3;O75970-2;B7ZB24;A0A075B6R8;H0YH70	O75970;F5H1U9;O75970-5;O75970-3;O75970-2	Multiple PDZ domain protein
GOPC	24.5065	24.5872	24.3072	0	45.993	2344500000	41	Q9HD26;Q9HD26-2;F5H1Y4;Q9HD26-3	Q9HD26;Q9HD26-2;F5H1Y4;Q9HD26-3	Golgi-associated PDZ and coiled-coil motif-containing protein
STARD10	23.5328	24.5486	23.5259	0	11.04	686210000	8	Q9Y365;F5H8G1;F5H1Z6;F5H8H3;F5H0V7;F5GY11;F5GWK5;H0YH17;H0YGA9;H0YFF3;F5H5A8;F5H3G8;F5GY07;H0YGN8	Q9Y365;F5H8G1;F5H1Z6;F5H8H3;F5H0V7;F5GY11;F5GWK5;H0YH17;H0YGA9;H0YFF3	PCTP-like protein
DMXL1	17.8711	16.6744	15.3668	0.00035249	4.4718	84480000	3	Q9Y485;F5H269	Q9Y485;F5H269	DmX-like protein 1
HMGA2	29.0926	29.1822	27.4989	0	110.97	10169000000	60	F5H2A4;P52926;F5H2U8;F5H6H0;P52926-3;P52926-6;P52926-4;P52926-5;P52926-2	F5H2A4;P52926;F5H2U8;F5H6H0;P52926-3;P52926-6;P52926-4;P52926-5;P52926-2	High mobility group protein HMGI-C
UACA	19.3261	19.2268	17.957	0	8.8509	208480000	3	Q9BZF9;F5H2B9;H0YNH8;Q9BZF9-2;H0YN48	Q9BZF9;F5H2B9;H0YNH8;Q9BZF9-2	Uveal autoantigen with coiled-coil domains and ankyrin repeats
MTHFD1	27.3425	27.2357	26.6659	0	293.76	31137000000	198	F5H2F4;V9GYY3;V9GY75	F5H2F4
DCTN2	27.9477	27.8677	26.5849	0	98.555	14130000000	91	Q13561;F5H2S7;Q13561-3;Q13561-2;H0YI98;F8W1I6;F8VW18;F8VX93;F8VRV7;H0YHL1;F8W0U6	Q13561;F5H2S7;Q13561-3;Q13561-2;H0YI98;F8W1I6;F8VW18	Dynactin subunit 2
CIZ1	23.1821	22.8519	21.6917	0	38.467	934640000	24	Q9ULV3;H0Y5D5;F5H2X7;Q9ULV3-5;Q9ULV3-2;Q5SYW2;Q9ULV3-3;Q9ULV3-4;Q96KB7	Q9ULV3;H0Y5D5;F5H2X7;Q9ULV3-5;Q9ULV3-2;Q5SYW2;Q9ULV3-3;Q9ULV3-4	Cip1-interacting zinc finger protein
HMBS	24.9014	24.8815	23.7682	0	62.923	1649500000	21	P08397;F5H345;P08397-2;P08397-4;P08397-3;F5GY90;F5H226;F5H0P4	P08397;F5H345;P08397-2;P08397-4;P08397-3;F5GY90	Porphobilinogen deaminase
SLC39A3	18.7948	23.4952	23.8125	0.00051813	4.0935	339570000	4	Q9BRY0;F5H385	Q9BRY0;F5H385	Zinc transporter ZIP3
TSG101	24.1166	24.3307	23.2326	0	42.938	1172100000	22	Q99816;F5H442;Q99816-2;J3QRU6;J3QKS4	Q99816;F5H442;Q99816-2	Tumor susceptibility gene 101 protein
TMED3	20.606	21.4408	20.5355	0	9.4462	83282000	7	Q9Y3Q3;G3V1J9;F5H4M7;Q9Y3Q3-2	Q9Y3Q3;G3V1J9;F5H4M7;Q9Y3Q3-2	Transmembrane emp24 domain-containing protein 3
PXMP2	23.4639	22.7982	21.8284	0	29.355	273710000	8	Q9NR77;F5H4N4	Q9NR77;F5H4N4	Peroxisomal membrane protein 2
MAP3K4	19.9329	18.9756	19.3721	0	5.8442	274380000	5	Q9Y6R4;Q9Y6R4-2;F5H4R1;J3KNB8;F5H538	Q9Y6R4;Q9Y6R4-2;F5H4R1;J3KNB8;F5H538	Mitogen-activated protein kinase kinase kinase 4
NAP1L1	24.069	25.8956	24.3235	0	89.994	2090700000	8	P55209;F8VUX1;F8VY35;F8W0J6;F5H4R6;H0YIV4;P55209-2;F8W020;F8VXI6;F8VVB5	P55209;F8VUX1;F8VY35;F8W0J6;F5H4R6;H0YIV4;P55209-2;F8W020;F8VXI6;F8VVB5	Nucleosome assembly protein 1-like 1
PDCD2	21.3115	21.4473	19.5127	0.00018028	5.0058	141110000	6	Q16342;F5H4V9;Q16342-3	Q16342;F5H4V9;Q16342-3	Programmed cell death protein 2
MAP4K3	20.034	17.1398	17.7859	0	6.6803	69959000	2	Q8IVH8;Q8IVH8-3;F5H5A3;Q8IVH8-2;H7C1A4	Q8IVH8;Q8IVH8-3;F5H5A3;Q8IVH8-2;H7C1A4	Mitogen-activated protein kinase kinase kinase kinase 3;Mitogen-activated protein kinase kinase kinase kinase
TUBA1C	25.3777	25.6132	22.8607	0	53.403	2467500000	22	Q9BQE3;F5H5D3;F8VQQ4;F8VVB9;F8VRZ4;F8VS66;F8VWV9;F8VX09;F8VRK0;F8VXZ7;F8W0F6	Q9BQE3;F5H5D3	Tubulin alpha-1C chain
IFNGR1	21.5561	19.6685	20.105	0.00035336	4.5387	131620000	3	P15260;F5H5M7	P15260;F5H5M7	Interferon gamma receptor 1
BCKDHA	26.002	25.6206	24.5046	0	83.232	4773000000	57	P12694;F5H5P2;P12694-2;F5GXU9;H0YH31	P12694;F5H5P2;P12694-2;F5GXU9	2-oxoisovalerate dehydrogenase subunit alpha, mitochondrial
UBE3B	17.9085	20.9461	21.3791	0.00241	2.8184	261130000	3	Q7Z3V4;F5H5T5;Q7Z3V4-2	Q7Z3V4;F5H5T5;Q7Z3V4-2	Ubiquitin-protein ligase E3B
DDX55	23.0233	22.3807	20.1976	0	53.539	561230000	20	Q8NHQ9;F5H5U2;E7EX41;Q8NHQ9-2;F5H2I2;F5H735	Q8NHQ9;F5H5U2	ATP-dependent RNA helicase DDX55
KDM6A;UTY	20.3876	19.7551	17.6524	0	10.379	210330000	6	O15550;F5H5V6;F5H6S1;F8W8R6;H0Y6I7;H0Y5J3;O14607;F5GWV3;F5H3N7;F5H8B4;O14607-2;O14607-5;O14607-3;O14607-4	O15550;F5H5V6;F5H6S1;F8W8R6;H0Y6I7;H0Y5J3;O14607;F5GWV3;F5H3N7;F5H8B4;O14607-2;O14607-5;O14607-3;O14607-4	Lysine-specific demethylase 6A;Histone demethylase UTY
CLASP2	23.8041	23.6797	22.6707	0	85.497	3900200000	66	F5H604;E3W994;O75122;J3KR49;E7ERI8;E7EW49;H7C4I5;B3KR06;E7ENG2;O75122-2;H7C4X8;H7C5M8;C9J668;D6RBU8;H7C4M5	F5H604;E3W994;O75122;J3KR49;E7ERI8;E7EW49	CLIP-associating protein 2
HEATR5A	22.2357	22.4717	21.356	0	75.376	1587200000	49	Q86XA9;F5H619;Q86XA9-2;H7C5W6;H0YIW3;F8VQQ6;Q86XA9-3;H0YHE0;H0YHS5	Q86XA9;F5H619;Q86XA9-2;H7C5W6	HEAT repeat-containing protein 5A
TAF1C	17.4063	17.3224	17.5724	0.00083556	3.4733	14179000	2	Q15572;H3BUZ7;H3BNH3;H3BR91;F5H647;Q15572-2;Q15572-6	Q15572;H3BUZ7;H3BNH3;H3BR91;F5H647;Q15572-2;Q15572-6	TATA box-binding protein-associated factor RNA polymerase I subunit C
DHX8	22.6447	22.4288	21.3502	0	41.592	1230200000	26	Q14562;F5H658;K7EJH9;K7EQH7;S4R3S0;K7END7	Q14562;F5H658	ATP-dependent RNA helicase DHX8
CPSF7	26.4054	25.9002	25.0595	0	86.37	4357600000	47	Q8N684;F5H669;Q8N684-2;Q8N684-3;F5H6M0;F5H047;J3QT54;C9J286;C9J323;C9JM38;F5H5B7;F5H1W4;F5H2K8;F5H6P5;F5H6A8;F5GXA3	Q8N684;F5H669;Q8N684-2;Q8N684-3;F5H6M0;F5H047	Cleavage and polyadenylation specificity factor subunit 7
MYO1C	24.7709	24.5075	24.0557	0	165.21	5607600000	101	O00159;O00159-3;F5H6E2;O00159-2;I3L204;I3L501;I3L4D4;I3L3Y6;I3L168;I3L3F5	O00159;O00159-3;F5H6E2;O00159-2	Unconventional myosin-Ic
B2M	27.7292	26.3356	25.7961	0	15.745	2575000000	9	P61769;F5H6I0;H0YLF3	P61769;F5H6I0;H0YLF3	Beta-2-microglobulin;Beta-2-microglobulin form pI 5.3
ATL3	23.6282	22.9263	20.8427	0.00050847	3.7055	637990000	4	F5H6I7	F5H6I7
GOLT1B	25.6941	25.0323	24.2601	0	23.304	815410000	11	Q9Y3E0;F5H6U7;G3V1U5;F5GWD8;F5GXH6	Q9Y3E0;F5H6U7;G3V1U5	Vesicle transport protein GOT1B
CDK17;CDK16	20.1877	18.07	18.9965	0.0072823	2.2168	29704000	2	Q00537;Q00537-2;F5H6Z0;E5RGN0;E5RIY8;H0YBX5;E5RIU4;F8VZY6;F8VQZ9;E5RJM2	Q00537;Q00537-2;F5H6Z0;E5RGN0	Cyclin-dependent kinase 17
MRPL48	26.7287	25.6424	24.4945	0	13.723	2252200000	13	Q96GC5;F5H702;Q96GC5-3;F5H8D0	Q96GC5;F5H702;Q96GC5-3	39S ribosomal protein L48, mitochondrial
TLE3	17.9258	20.1477	20.07	0.0078522	2.1347	76916000	2	F5H7D6;H0YNT2;H0YNI7;Q04725-2;H3BUH5;H0YKH5;K7EJR7;H7C4E4	F5H7D6;H0YNT2;H0YNI7
PLA2G16	18.751	22.2572	21.6835	0.0083995	2.0444	71539000	2	P53816;F5H7E5	P53816;F5H7E5	HRAS-like suppressor 3
LRP6	17.8041	19.1294	18.1864	0.00017876	4.8158	86418000	1	O75581;H0YGW5;F5H7J9	O75581;H0YGW5;F5H7J9	Low-density lipoprotein receptor-related protein 6
PPWD1	23.5982	23.3672	21.4719	0	20.312	1165300000	29	Q96BP3;F5H7P7;Q96BP3-2;D6R9Q1;H0Y8N5;D6RD43;D6RB19;D6RHV0	Q96BP3;F5H7P7;Q96BP3-2	Peptidylprolyl isomerase domain and WD repeat-containing protein 1
SOAT2	21.7257	18.8856	18.2828	0.0019484	2.9994	92104000	2	O75908;F8VPE9;F5H7W4	O75908;F8VPE9;F5H7W4	Sterol O-acyltransferase 2
F7	22.7907	21.9975	19.7995	0	10.178	298990000	5	P08709;F5H8B0;P08709-2	P08709;F5H8B0;P08709-2	Coagulation factor VII;Factor VII light chain;Factor VII heavy chain
ASH2L	25.3689	24.7893	23.0711	0	135.02	2909500000	51	Q9UBL3;F5H8F7;Q9UBL3-3;Q9UBL3-2;H0YBF6;H0YAQ0	Q9UBL3;F5H8F7;Q9UBL3-3;Q9UBL3-2	Set1/Ash2 histone methyltransferase complex subunit ASH2
MVK	25.4798	26.0772	24.4271	0	295.13	3397100000	41	Q03426;F5H8H2;F5H092;F5GXC0;F5H163;F5H368	Q03426;F5H8H2	Mevalonate kinase
SIPA1	18.6636	18.4718	20.1117	0	8.5626	159760000	4	Q96FS4;F6RY50	Q96FS4;F6RY50	Signal-induced proliferation-associated protein 1
RBM38;RBM24	21.7942	22.9061	18.1624	0.00099092	3.2535	127620000	2	Q9H0Z9;Q9BX46;F6VZ39;Q9H0Z9-2;E9PSF1;H0YA61;A6NG75;H0Y8S7;Q9BX46-5;Q9BX46-2	Q9H0Z9;Q9BX46;F6VZ39;Q9H0Z9-2;E9PSF1;H0YA61;A6NG75;H0Y8S7;Q9BX46-5;Q9BX46-2	RNA-binding protein 38;RNA-binding protein 24
MICU1	23.7021	23.0932	22.3048	0	50.11	955860000	20	Q9BPX6;F6XEV2;Q9BPX6-3;Q9BPX6-2;E9PQV6;Q9BPX6-5;Q9BPX6-4;S4R3W3;S4R3D7;S4R3V1	Q9BPX6;F6XEV2;Q9BPX6-3;Q9BPX6-2;E9PQV6;Q9BPX6-5;Q9BPX6-4;S4R3W3	Calcium uptake protein 1, mitochondrial
TRAFD1	18.438	20.3299	19.937	0.0074257	2.1981	83737000	1	O14545;F8VNX8	O14545;F8VNX8	TRAF-type zinc finger domain-containing protein 1
CAD	23.3331	23.5292	23.0003	0	120.97	4068700000	74	P27708;F8VPD4;H7C2E4;H7BZB3;H7C3Z5	P27708;F8VPD4	CAD protein;Glutamine-dependent carbamoyl-phosphate synthase;Aspartate carbamoyltransferase;Dihydroorotase
SLC38A4	20.8046	19.2932	18.944	0.0094527	2.0131	63473000	2	Q969I6;F8VRD9;F8VQY9	Q969I6;F8VRD9;F8VQY9	Sodium-coupled neutral amino acid transporter 4
DNA2	18.2601	18.1937	17.5542	0.00051142	3.8012	55629000	3	P51530;F8VR31;J3KPX5;P51530-2;P51530-3;P51530-4	P51530;F8VR31;J3KPX5;P51530-2;P51530-3;P51530-4	DNA replication ATP-dependent helicase/nuclease DNA2;DNA replication nuclease DNA2;DNA replication ATP-dependent helicase DNA2
PRPF40B	19.1239	21.0949	16.6164	0.0014701	3.0792	27660000	3	Q6NWY9;F8VU11;Q6NWY9-2;Q6NWY9-3	Q6NWY9;F8VU11;Q6NWY9-2;Q6NWY9-3	Pre-mRNA-processing factor 40 homolog B
BAZ2A	22.9661	23.068	22.261	0	55.158	1899000000	33	Q9UIF9;J3KPG5;F8VU39;Q9UIF9-2;Q9UIF9-3;H0YII3;H0YHL2;H0YHQ7	Q9UIF9;J3KPG5;F8VU39;Q9UIF9-2;Q9UIF9-3	Bromodomain adjacent to zinc finger domain protein 2A
FKBP11	28.7451	28.3292	27.4578	0	28.591	9579500000	38	Q9NYL4;F8VU90;Q9NYL4-2;E9PAR0;H0YHM7	Q9NYL4;F8VU90;Q9NYL4-2	Peptidyl-prolyl cis-trans isomerase FKBP11;Peptidyl-prolyl cis-trans isomerase
CHMP1A	21.8451	23.6862	22.3489	0	5.8217	280440000	6	Q9HD42;F8VUA2;F8VVT7	Q9HD42;F8VUA2;F8VVT7	Charged multivesicular body protein 1a
GALNT4;POC1B-GALNT4	22.4238	20.8196	19.4053	0	14.336	334290000	7	Q8N4A0;F8VUJ3;Q8N4A0-2	Q8N4A0;F8VUJ3;Q8N4A0-2	Polypeptide N-acetylgalactosaminyltransferase 4;Polypeptide N-acetylgalactosaminyltransferase
CNOT2	25.0772	25.3353	23.4081	0	71.549	2765400000	35	Q9NZN8;F8VV52;Q9NZN8-5;Q9NZN8-4;Q9NZN8-2;F8VP97;F8VUB4;F8VQD8;F8W145;Q9NZN8-3;H0YI11;F8VVY1;H0YH84;F8VX63;F8VRS8;F8VWH8;H0YHT8;H0YI80;H0YHT6;F8VQF4	Q9NZN8;F8VV52;Q9NZN8-5;Q9NZN8-4;Q9NZN8-2;F8VP97	CCR4-NOT transcription complex subunit 2
COPZ1	25.7625	26.3035	25.5633	0	21.273	1025000000	5	P61923;F8VVA7;F8VXB1;F8VUC5;F8W156;F8W651;F8VYZ4;P61923-5;P61923-4;F8VXR1;F8VYK5;P61923-2;P61923-3	P61923;F8VVA7;F8VXB1;F8VUC5;F8W156;F8W651;F8VYZ4;P61923-5;P61923-4;F8VXR1	Coatomer subunit zeta-1
DENR	23.5499	23.6326	21.4991	0	63.546	296770000	8	O43583;F8VVL1	O43583;F8VVL1	Density-regulated protein
SPRYD3	21.0332	20.4961	18.5411	0.00067476	3.6136	65248000	2	Q8NCJ5;F8VWW7	Q8NCJ5;F8VWW7	SPRY domain-containing protein 3
ARHGAP29	20.9847	20.0089	19.9442	0.0084085	2.0527	409960000	4	Q52LW3;F8VWZ8	Q52LW3;F8VWZ8	Rho GTPase-activating protein 29
SLC38A1	24.4253	23.2324	23.1265	0	8.8087	743180000	7	Q9H2H9;F8VX04;F8VX12	Q9H2H9;F8VX04	Sodium-coupled neutral amino acid transporter 1
KANSL2	19.6828	20.0088	18.8759	0.0019443	2.9712	72162000	4	Q9H9L4;H0YHR2;H0YIQ8;F8VXI8;F8VX10	Q9H9L4;H0YHR2;H0YIQ8;F8VXI8;F8VX10	KAT8 regulatory NSL complex subunit 2
DMD	24.5466	24.5729	23.2106	0	72.938	2204800000	31	P11532-5;F8VX32;H0Y304;E7ESB2;P11532-8;P11532-6;P11532;E7EQS5;E9PDN5;A0A075B6G3;P11532-7;P11532-3;P11532-2;P11532-4;E7EQR9;P11532-9;F5GZY3;P11532-10;H0Y3E8	P11532-5;F8VX32;H0Y304;E7ESB2;P11532-8;P11532-6;P11532;E7EQS5;E9PDN5;A0A075B6G3;P11532-7;P11532-3;P11532-2;P11532-4;E7EQR9;P11532-9;F5GZY3;P11532-10	Dystrophin
SCAF11	22.7667	22.6686	20.7677	0	55.392	1229000000	25	Q99590;F8VXG7;Q99590-2	Q99590;F8VXG7;Q99590-2	Protein SCAF11
GIT2	20.5243	19.0524	17.827	0.00018077	5.0744	102550000	3	Q14161;F8VXI9;Q14161-4;Q14161-3;Q14161-10;R4GNG3;F8WAK2;Q14161-11;Q14161-7;Q14161-9;Q14161-6;Q14161-8;Q14161-5;F8W822;Q14161-2	Q14161;F8VXI9;Q14161-4;Q14161-3;Q14161-10;R4GNG3;F8WAK2;Q14161-11;Q14161-7;Q14161-9;Q14161-6;Q14161-8;Q14161-5	ARF GTPase-activating protein GIT2
PPP1CC	24.7068	23.6714	23.8173	0	7.3909	1115400000	6	P36873;P36873-2;F8VYE8;F8VR82;F8W0W8;F8WE71;H0Y3Y6;F8W1A0	P36873;P36873-2;F8VYE8;F8VR82;F8W0W8	Serine/threonine-protein phosphatase PP1-gamma catalytic subunit;Serine/threonine-protein phosphatase
PCBP2	23.4566	23.394	21.8205	0	10.069	604120000	5	H3BRU6;F8VZX2;F8W0G4;F8VXH9;F8W1G6;J3QT27;P57721-2;P57721-3;H3BND9	H3BRU6;F8VZX2;F8W0G4;F8VXH9
BAP18;C17orf49;RNASEK-C17orf49	25.9877	25.5518	23.3414	0	37.111	1165800000	17	Q8IXM2;Q8IXM2-3;F8W038;H0YIS7;F8W1H0;Q8IXM2-2	Q8IXM2;Q8IXM2-3;F8W038;H0YIS7;F8W1H0	Chromatin complexes subunit BAP18
MCRS1	22.2164	19.4387	18.6647	0	8.7484	180620000	6	Q96EZ8;Q96EZ8-2;F8W126;Q96EZ8-3;F8W0I9;F8VVA6;F8VP44;Q96EZ8-4	Q96EZ8;Q96EZ8-2;F8W126;Q96EZ8-3;F8W0I9;F8VVA6;F8VP44;Q96EZ8-4	Microspherule protein 1
AK2	28.396	27.8328	27.2264	0	92.515	12584000000	66	P54819;F8W1A4;P54819-2;P54819-5;P54819-6;F8VY04;P54819-3;P54819-4;F8VZG5;G3V213;F8VPP1	P54819;F8W1A4;P54819-2;P54819-5;P54819-6;F8VY04;P54819-3;P54819-4;F8VZG5	Adenylate kinase 2, mitochondrial;Adenylate kinase 2, mitochondrial, N-terminally processed;Adenylate kinase 2, mitochondrial
CHPT1	23.5708	22.8514	22.1893	0	6.362	328130000	2	Q8WUD6;F8W1B3;Q8WUD6-2	Q8WUD6;F8W1B3;Q8WUD6-2	Cholinephosphotransferase 1
MYL6B	23.4025	22.1466	21.2208	0	8.085	333280000	9	P14649;F8W1I5	P14649;F8W1I5	Myosin light chain 6B
ACAD10	18.5062	19.5986	17.3626	0	5.8929	45683000	3	Q6JQN1;F8W1I9;Q6JQN1-4;Q6JQN1-2;Q6JQN1-5;D6RFF6	Q6JQN1;F8W1I9;Q6JQN1-4;Q6JQN1-2;Q6JQN1-5;D6RFF6	Acyl-CoA dehydrogenase family member 10
SLC11A2	23.5014	23.3144	21.2547	0	16.753	402570000	4	P49281;P49281-2;F8W1P7;P49281-5;P49281-3;P49281-4	P49281;P49281-2;F8W1P7;P49281-5;P49281-3;P49281-4	Natural resistance-associated macrophage protein 2
SENP6	18.4395	17.854	17.1312	0	7.0916	91496000	6	Q9GZR1;F8W6D9;Q9GZR1-2;H0Y8Y8;H0Y4F4;D6RJH1	Q9GZR1;F8W6D9;Q9GZR1-2;H0Y8Y8;H0Y4F4	Sentrin-specific protease 6
ZDHHC3	23.0773	21.6672	19.7225	0	38.901	162090000	8	Q9NYG2;F8W6M3;Q9NYG2-2	Q9NYG2;F8W6M3;Q9NYG2-2	Palmitoyltransferase ZDHHC3;Palmitoyltransferase
ZNF384	24.2785	22.608	22.3513	0	36.286	764970000	10	Q8TF68;F8W6Q3;Q8TF68-3;Q8TF68-2;E9PHB3;F5H8L7;Q5T0B9;F5H105	Q8TF68;F8W6Q3;Q8TF68-3;Q8TF68-2;E9PHB3;F5H8L7	Zinc finger protein 384
BRE	24.6556	24.1245	23.2402	0	52.176	1286000000	14	Q9NXR7;Q9NXR7-4;Q9NXR7-3;F8W733;Q9NXR7-1;C9J2G0;A0A075B7D2	Q9NXR7;Q9NXR7-4;Q9NXR7-3;F8W733;Q9NXR7-1;C9J2G0	BRCA1-A complex subunit BRE
FAM162A	26.8275	25.4866	26.0623	0	94.355	2203300000	27	Q96A26;F8W7Q4;E9PH05	Q96A26;F8W7Q4;E9PH05	Protein FAM162A
FAM73A	20.601	19.8058	18.2237	0	8.366	98462000	5	Q8NAN2;F8W7S1;Q8NAN2-2	Q8NAN2;F8W7S1;Q8NAN2-2	Protein FAM73A
MRE11A	25.4799	25.3113	24.3883	0	76.755	4745200000	59	P49959;F8W7U8;P49959-2;B3KTC7;F5GXT0;F5H742;F5H256	P49959;F8W7U8;P49959-2;B3KTC7	Double-strand break repair protein MRE11A
TIA1	24.916	24.4738	23.4432	0	26.871	1252100000	18	P31483;F8W8I6;Q96B58;E5RGV5;E5RG67	P31483;F8W8I6;Q96B58;E5RGV5;E5RG67	Nucleolysin TIA-1 isoform p40
POLD2	25.7806	24.3242	24.0716	0	64.468	2634300000	23	P49005;F8W8R3;C9IZD2;C9J8Z7;C9JLE1;C9JHC7;H7C1B3	P49005;F8W8R3;C9IZD2;C9J8Z7;C9JLE1;C9JHC7	DNA polymerase delta subunit 2
IGF2BP2	26.8065	26.9839	25.8598	0	95.746	12034000000	81	Q9Y6M1;F8W930;Q9Y6M1-1;Q9Y6M1-5;Q9Y6M1-6;Q9Y6M1-3;Q9Y6M1-4	Q9Y6M1;F8W930;Q9Y6M1-1;Q9Y6M1-5;Q9Y6M1-6;Q9Y6M1-3;Q9Y6M1-4	Insulin-like growth factor 2 mRNA-binding protein 2
MEF2A	21.7238	21.6348	18.5037	0	6.6182	113490000	4	Q02078-2;F8W966;Q02078-8;Q02078-7;Q02078-4;Q02078-6;Q02078;Q02078-3;Q02078-5	Q02078-2;F8W966;Q02078-8;Q02078-7;Q02078-4;Q02078-6;Q02078;Q02078-3;Q02078-5	Myocyte-specific enhancer factor 2A
CYP4F11;CYP4F2;CYP4F3;CYP4F12	19.5071	18.3811	18.3847	0.0016313	3.0587	44911000	2	Q9HBI6;P78329;Q08477;Q9HCS2;F8W978;P78329-2;Q08477-2	Q9HBI6;P78329;Q08477;Q9HCS2;F8W978;P78329-2;Q08477-2	Phylloquinone omega-hydroxylase CYP4F11;Phylloquinone omega-hydroxylase CYP4F2;Docosahexaenoic acid omega-hydroxylase CYP4F3;Cytochrome P450 4F12
WNK2	20.4223	19.9107	17.2512	0.0024151	2.8547	260610000	3	Q9Y3S1;F8W9F9;H0Y7T5;Q9Y3S1-2;Q9Y3S1-4;A6PVV2;Q9Y3S1-3;H0Y7R3;E9PCD1;H0Y7J9;H0Y493	Q9Y3S1;F8W9F9;H0Y7T5;Q9Y3S1-2;Q9Y3S1-4;A6PVV2;Q9Y3S1-3	Serine/threonine-protein kinase WNK2
GAPVD1	23.3707	23.428	22.9695	0	72.916	2328300000	46	Q14C86;Q14C86-6;Q14C86-3;Q14C86-5;F8W9S7;Q14C86-4;Q14C86-2;C9IZ08;B0QZ65;B4DGD8;H0Y4E7;H0Y7I9;C9IZX9	Q14C86;Q14C86-6;Q14C86-3;Q14C86-5;F8W9S7;Q14C86-4;Q14C86-2;C9IZ08;B0QZ65;B4DGD8	GTPase-activating protein and VPS9 domain-containing protein 1
EPHA5	21.6844	21.0136	16.8492	0	16.469	400470000	14	P54756;F8W9W0;P54756-2;P54756-3;F8VP57;P29320;C9JXA2;P54764;E9PG71;P54764-2	P54756;F8W9W0;P54756-2;P54756-3;F8VP57	Ephrin type-A receptor 5;Receptor protein-tyrosine kinase
CCDC93	22.5788	22.6247	21.8951	0	34.976	730960000	18	Q567U6;F8W9X7;H7C050	Q567U6;F8W9X7	Coiled-coil domain-containing protein 93
STX3	25.2933	25.0386	23.689	0	18.775	1417900000	23	Q13277;F8W9Y0;Q13277-2;Q13277-3	Q13277;F8W9Y0;Q13277-2;Q13277-3	Syntaxin-3
PBX2;PBX1	17.5213	21.7747	20.316	0.00051476	3.9567	144780000	2	P40425;P40424;P40424-2;H0YLM3;H0YLD4;H0YLT4;H0YKH1;F8WA05;H0YLB0;H0YLF5;P40424-3	P40425;P40424;P40424-2;H0YLM3;H0YLD4;H0YLT4;H0YKH1;F8WA05;H0YLB0;H0YLF5;P40424-3	Pre-B-cell leukemia transcription factor 2;Pre-B-cell leukemia transcription factor 1
MTMR1	22.2951	21.7774	19.8796	0	14.518	375020000	12	Q13613;F8WA39;Q8NEC6;H0YDX3;Q13613-2;E9PIH9;F8W764;F8W8S8;H7BZJ1;H7C406;E9PPP8	Q13613;F8WA39;Q8NEC6;H0YDX3;Q13613-2	Myotubularin-related protein 1
ZBTB40	18.2988	16.9656	17.1138	0	6.6744	47412000	4	Q9NUA8;F8WAI8	Q9NUA8;F8WAI8	Zinc finger and BTB domain-containing protein 40
DDX31	22.3201	22.268	21.2871	0	36.28	707600000	24	Q9H8H2;F8WAJ0;Q9H8H2-2;Q9H8H2-4;Q9H8H2-3	Q9H8H2;F8WAJ0;Q9H8H2-2;Q9H8H2-4	Probable ATP-dependent RNA helicase DDX31
PRKD1;PRKD3	20.2019	20.5725	17.6252	0	5.4468	113030000	3	Q15139;F8WBA3;O94806;H0YHL5;O94806-2	Q15139;F8WBA3;O94806	Serine/threonine-protein kinase D1;Serine/threonine-protein kinase;Serine/threonine-protein kinase D3
DXO	17.9668	20.8216	16.871	0.00017982	4.9507	46012000	3	O77932;F8WC68	O77932;F8WC68	Decapping and exoribonuclease protein
VAMP2	19.0281	23.1039	22.1292	0	5.323	68010000	4	P63027;J3QRU4;F8WCA0;L7N2F9	P63027;J3QRU4;F8WCA0;L7N2F9	Vesicle-associated membrane protein 2
RNF149	21.2823	19.3025	19.9441	0	6.7613	118010000	7	Q8NC42;F8WCD0	Q8NC42;F8WCD0	E3 ubiquitin-protein ligase RNF149
ARPC4;ARPC4-TTLL3	27.1724	27.7995	27.0156	0	19.292	5038700000	20	P59998;F8WCF6;P59998-3;F8WDD7;H7C0A3;P59998-2;F8WE39;R4GN08;P59998-4;F8WDW3	P59998;F8WCF6;P59998-3;F8WDD7;H7C0A3;P59998-2	Actin-related protein 2/3 complex subunit 4
CPSF6	27.2415	27.3738	25.9937	0	265.62	8937500000	47	Q16630;Q16630-2;F8WJN3;Q16630-3;F8W084	Q16630;Q16630-2;F8WJN3;Q16630-3	Cleavage and polyadenylation specificity factor subunit 6
ANKMY2	22.0865	22.7243	22.3189	0	19.024	519370000	10	Q8IV38;G3V0G5;F8WB95	Q8IV38;G3V0G5	Ankyrin repeat and MYND domain-containing protein 2
NDUFV1	26.9014	25.8643	24.9516	0	83.028	6336200000	49	P49821;G3V0I5;P49821-2;B4DE93;E9PQP1;E9PMX3;E9PLC6;E9PPR0;E9PJL9;E9PPS5;H0YE81;E9PPD6;H0YD04	P49821;G3V0I5;P49821-2;B4DE93;E9PQP1	NADH dehydrogenase [ubiquinone] flavoprotein 1, mitochondrial
PARP2	24.2769	23.9322	22.4974	0	29.859	1599000000	21	Q9UGN5;G3V167;Q9UGN5-2;H0YH02	Q9UGN5;G3V167;Q9UGN5-2;H0YH02	Poly [ADP-ribose] polymerase 2
APOO	24.3877	23.7715	22.8064	0.00018083	5.0791	496870000	2	Q9BUR5;G3V1B6;H7C1U8;Q9BUR5-2	Q9BUR5;G3V1B6;H7C1U8;Q9BUR5-2	Apolipoprotein O
TJP1	25.712	24.0755	23.431	0	138.72	9526900000	99	Q07157;G3V1L9;Q07157-2;G5E9E7;H0YKB1;H0Y3R8;H0YLT6	Q07157;G3V1L9;Q07157-2;G5E9E7	Tight junction protein ZO-1
GAS2L3	20.097	20.5025	17.7888	0	11.59	108250000	5	Q86XJ1;H0YIT6;G3V1N3	Q86XJ1;H0YIT6;G3V1N3	GAS2-like protein 3
LOH12CR1	21.9163	21.9713	21.8941	0	7.5176	184260000	3	Q969J3;G3V1P3	Q969J3;G3V1P3	Loss of heterozygosity 12 chromosomal region 1 protein
FCF1	24.7849	23.8237	18.5175	0	7.0223	302980000	4	Q9Y324;G3V5S9;G3V1S4;G3V2M5	Q9Y324;G3V5S9;G3V1S4	rRNA-processing protein FCF1 homolog
ZFYVE26	16.8455	19.0727	15.8978	0.0022577	2.8778	35197000	3	Q68DK2;G3V2D8;Q68DK2-2;G3V230;Q68DK2-4	Q68DK2;G3V2D8;Q68DK2-2	Zinc finger FYVE domain-containing protein 26
UBE2V1	27.8984	27.8967	27.2267	0	37.322	13501000000	39	G3V2F7;Q13404;Q13404-7;Q13404-2;Q13404-1;Q13404-8;Q13404-6;A5PLL7;Q5TGE2	G3V2F7;Q13404;Q13404-7;Q13404-2;Q13404-1;Q13404-8;Q13404-6	Ubiquitin-conjugating enzyme E2 variant 1
HNRNPC	24.5541	24.3975	22.8095	0	31.868	1089700000	9	P07910;G3V2Q1;G3V576;G3V555;G3V575	P07910;G3V2Q1;G3V576;G3V555;G3V575	Heterogeneous nuclear ribonucleoproteins C1/C2
ATP5J2-PTCD1;PTCD1	24.9502	24.374	23.8208	0	28.826	3201100000	32	G3V325;O75127;P56134-4;P56134-2;C9JJT5;C9JU26;C9JGL8;C9JQN9	G3V325;O75127	Pentatricopeptide repeat-containing protein 1, mitochondrial
METTL17	19.7262	19.0795	17.8167	0.0005071	3.6629	36348000	3	Q9H7H0;G3V353;Q9H7H0-2;Q9H7H0-3;G3V4P2;G3V3X6;G3V4H5	Q9H7H0;G3V353;Q9H7H0-2;Q9H7H0-3;G3V4P2;G3V3X6	Methyltransferase-like protein 17, mitochondrial
DCAF8	20.3248	21.0334	18.1326	0	5.7134	145310000	6	G3V3G9;Q5TAQ9;H0YDY4;V9GY54;Q5TAQ8;Q5TAQ9-2	G3V3G9;Q5TAQ9	DDB1- and CUL4-associated factor 8
PTGR2	24.2308	25.4013	24.2553	0	34.867	1483800000	20	Q8N8N7;G3V3Y1;Q8N8N7-2;G3V288;G3V2R9	Q8N8N7;G3V3Y1;Q8N8N7-2;G3V288	Prostaglandin reductase 2
VIPAS39	20.7381	20.2909	18.2764	0	11.14	84891000	4	Q9H9C1;G3V4K3;Q9H9C1-2	Q9H9C1;G3V4K3;Q9H9C1-2	Spermatogenesis-defective protein 39 homolog
GNPNAT1	22.5729	24.3586	23.7803	0	14.383	474580000	9	Q96EK6;G3V4W4;G3V5E4	Q96EK6;G3V4W4	Glucosamine 6-phosphate N-acetyltransferase
DDX24	25.8082	25.08	23.7394	0	161.86	5810800000	77	Q9GZR7;G3V529;Q9GZR7-2;F5GYL3	Q9GZR7;G3V529;Q9GZR7-2;F5GYL3	ATP-dependent RNA helicase DDX24
HAUS4	18.9641	18.6436	18.7881	0.00035373	4.5595	11467000	3	Q9H6D7;G3V541;H0YIZ6;G3V5A5;Q9H6D7-3;Q9H6D7-4;H0YJ09;G3V5Z2;G3V4X7;G3V2T6	Q9H6D7;G3V541;H0YIZ6;G3V5A5;Q9H6D7-3;Q9H6D7-4	HAUS augmin-like complex subunit 4
FAM177A1	21.3419	21.968	25.7009	0	5.3826	735660000	3	Q8N128;G3V583;Q8N128-2;G3V3Z5	Q8N128;G3V583;Q8N128-2	Protein FAM177A1
CTAGE5	25.0684	24.4937	23.6647	0	169.63	5943000000	79	G3V599;O15320;O15320-8;O15320-4;O15320-3;O15320-10;O15320-6;O15320-5;O15320-7;O15320-2;O15320-9;Q96RT6;Q86UF2;A4D2H0;A4FU28;Q8IX94;P0CG41;Q96PC5;G3V5K6;G3V3C4;Q8IX95	G3V599;O15320;O15320-8;O15320-4;O15320-3;O15320-10;O15320-6;O15320-5;O15320-7;O15320-2;O15320-9	cTAGE family member 5
THTPA	17.4432	19.5551	16.2996	0.0081102	2.0683	0	1	Q9BU02;G3V5B9;G3V5Q5;Q9BU02-2	Q9BU02;G3V5B9;G3V5Q5;Q9BU02-2	Thiamine-triphosphatase
KLC1	24.4844	24.5765	23.0765	0	111.13	2912800000	35	Q07866-4;Q07866-6;Q07866-7;G3V5R9;Q07866-9;Q07866;Q07866-2;G3V2E7;F8W6L3;G3V3H3;E7EVH7;Q07866-8;Q07866-3;Q07866-5;Q07866-10;G5E9S8;G3V2P7;H0YG16;H0YJU9;H0YJL0;H0YJT3;H0YJK1;H0YGB8	Q07866-4;Q07866-6;Q07866-7;G3V5R9;Q07866-9;Q07866;Q07866-2;G3V2E7;F8W6L3;G3V3H3;E7EVH7;Q07866-8;Q07866-3;Q07866-5;Q07866-10;G5E9S8	Kinesin light chain 1
CDK2	25.5637	25.8647	24.7698	0	47.337	3023400000	38	P24941;G3V5T9;P24941-2;E7ESI2;Q00526;G3V317;K7EJ83	P24941;G3V5T9;P24941-2;E7ESI2	Cyclin-dependent kinase 2
SMEK1	24.3035	24.3562	23.2473	0	49.072	2585600000	41	Q6IN85;G3V5Z3;Q6IN85-2;H0YIY8;Q6IN85-5;Q6IN85-4;G3V5A2;H0YJN6;G3V4R3;G3V231;Q5MIZ7-4	Q6IN85;G3V5Z3;Q6IN85-2;H0YIY8;Q6IN85-5;Q6IN85-4	Serine/threonine-protein phosphatase 4 regulatory subunit 3A
PSMA6	28.5143	28.1303	27.6849	0	52.285	18812000000	51	P60900;G3V5Z7;G3V295;G3V3I1;P60900-2;G3V3U4;P60900-3;G3V4S5;G3V2S7;H0YJC4	P60900;G3V5Z7;G3V295;G3V3I1;P60900-2;G3V3U4	Proteasome subunit alpha type-6;Proteasome subunit alpha type
COQ6	22.2311	20.2112	20.4015	0	13.208	145070000	10	Q9Y2Z9;G3XA86;Q9Y2Z9-2;Q9Y2Z9-3	Q9Y2Z9;G3XA86;Q9Y2Z9-2;Q9Y2Z9-3	Ubiquinone biosynthesis monooxygenase COQ6, mitochondrial
SLC26A6	21.727	22.0083	19.1107	0	17.071	254470000	6	Q9BXS9;Q9BXS9-3;G3XAC1;Q9BXS9-7;Q9BXS9-2;F8W9I8;C9J6Y3;C9JKR6;Q9BXS9-6;Q9BXS9-4;H7BZB1;H7C291;Q9BXS9-5	Q9BXS9;Q9BXS9-3;G3XAC1;Q9BXS9-7;Q9BXS9-2;F8W9I8;C9J6Y3;C9JKR6;Q9BXS9-6;Q9BXS9-4	Solute carrier family 26 member 6
ZNF512	23.7396	22.5231	20.771	0	17.062	582550000	12	Q96ME7;G3XAG1;Q96ME7-2;Q96ME7-3;B4E0X7	Q96ME7;G3XAG1;Q96ME7-2;Q96ME7-3;B4E0X7	Zinc finger protein 512
PAPOLA	25.2354	24.5905	24.1493	0	83.389	4321300000	61	P51003;G3XAH6;G3V2A0;P51003-2;Q9NRJ5;G3V3I9;G3V457;H0YJ00;H0YJL4	P51003;G3XAH6;G3V2A0	Poly(A) polymerase alpha
LAMB1	25.8408	25.2776	23.7358	0	323.31	10832000000	93	P07942;G3XAI2;E7EPA6	P07942;G3XAI2	Laminin subunit beta-1
FAM133B;FAM133A	18.5569	22.4491	21.5573	0.0033355	2.6368	102760000	1	Q5BKY9;Q8N9E0;G3XAI9;Q5BKY9-2	Q5BKY9;Q8N9E0;G3XAI9;Q5BKY9-2	Protein FAM133B;Protein FAM133A
TRAM1	26.3859	25.9652	23.9246	0	23.928	2521900000	24	Q15629;G3XAN4;Q15629-2	Q15629;G3XAN4;Q15629-2	Translocating chain-associated membrane protein 1
MTMR3;MTMR4	18.4825	19.5837	17.3094	0.00083264	3.4044	77186000	2	Q13615;G5E953;Q13615-3;Q13615-2;Q9NYA4;J3QR65	Q13615;G5E953;Q13615-3;Q13615-2;Q9NYA4;J3QR65	Myotubularin-related protein 3;Myotubularin-related protein 4
SMARCB1	25.868	25.5419	22.9958	0	139.69	2637700000	24	Q12824;Q12824-2;G5E975;B5MCL5;C9JTA6	Q12824;Q12824-2;G5E975;B5MCL5;C9JTA6	SWI/SNF-related matrix-associated actin-dependent regulator of chromatin subfamily B member 1
USP11	21.9652	22.207	20.9079	0	21.919	671400000	17	P51784;G5E9A6;Q5JXD3	P51784;G5E9A6	Ubiquitin carboxyl-terminal hydrolase 11;Ubiquitin carboxyl-terminal hydrolase
NFKBIB	18.6831	21.5214	19.0598	0.0042393	2.4451	65038000	2	Q15653;I3L1A4;I3L4X3;G5E9C2;Q15653-2	Q15653;I3L1A4;I3L4X3;G5E9C2;Q15653-2	NF-kappa-B inhibitor beta
SOS1	19.326	18.1448	19.8867	0	10.334	171770000	4	Q07889;G5E9C8;Q07889-2	Q07889;G5E9C8	Son of sevenless homolog 1
ELP4	18.1628	20.964	20.9479	0.00017797	4.7059	123540000	3	Q96EB1;G5E9D4;Q96EB1-3;Q96EB1-2;E9PPJ9	Q96EB1;G5E9D4;Q96EB1-3;Q96EB1-2;E9PPJ9	Elongator complex protein 4
MRPL52	22.4344	22.308	18.1173	0	14.13	43442000	1	Q86TS9;G5E9P5;Q86TS9-3	Q86TS9;G5E9P5;Q86TS9-3	39S ribosomal protein L52, mitochondrial
HPS3	19.9117	19.7838	18.7187	0.00051894	4.1273	162080000	2	Q969F9;G5E9V4;Q969F9-2;H7C5G2	Q969F9;G5E9V4;Q969F9-2;H7C5G2	Hermansky-Pudlak syndrome 3 protein
MRPS22	26.3054	26.0643	24.9977	0	57.803	5477000000	46	P82650;G5E9W7;G5E9V5;H7C5H3;H7C5F2;P82650-2;H7C5L9;C9J5D8	P82650;G5E9W7;G5E9V5;H7C5H3;H7C5F2;P82650-2	28S ribosomal protein S22, mitochondrial
CHPF2	19.0209	17.9513	19.094	0.003337	2.6484	42971000	1	Q9P2E5;G5E9W2;Q9P2E5-2	Q9P2E5;G5E9W2;Q9P2E5-2	Chondroitin sulfate glucuronyltransferase
PI4K2B	23.7998	23.4492	22.1323	0	31.348	1311800000	28	Q8TCG2;G5E9Z4	Q8TCG2;G5E9Z4	Phosphatidylinositol 4-kinase type 2-beta
MRPS27	24.159	24.5908	24.1427	0	35.853	1684300000	32	Q92552;G5EA06;Q92552-2;D6RH20;D6RJC7;E5RJ73	Q92552;G5EA06;Q92552-2;D6RH20	28S ribosomal protein S27, mitochondrial
CELF1	27.9851	27.3349	26.6034	0	86.519	10806000000	44	Q92879;Q92879-4;G5EA30;Q92879-2;Q92879-3;Q92879-6;Q92879-5;E9PSH0;E9PQK4;E9PKU1;E9PKA1;F5H4Y5;F5H0D8;O95319;V9GYD9;Q5VZZ6;E9PC62;O95319-5;O95319-2;O95319-4;O95319-3	Q92879;Q92879-4;G5EA30;Q92879-2;Q92879-3;Q92879-6;Q92879-5	CUGBP Elav-like family member 1
AEBP2	20.1796	19.8774	17.624	0.0056005	2.2818	43015000	1	Q6ZN18;G5EA50;Q6ZN18-3;Q6ZN18-2;H0YH08;H7BYT4	Q6ZN18;G5EA50;Q6ZN18-3;Q6ZN18-2;H0YH08;H7BYT4	Zinc finger protein AEBP2
MAU2	21.6447	20.7292	20.5047	0.00035125	4.4082	162620000	6	Q9Y6X3;V9GYS3;V9GZ52;G8JL95	Q9Y6X3;V9GYS3;V9GZ52;G8JL95	MAU2 chromatid cohesion factor homolog
PUS1	24.1804	24.0136	22.6798	0	38.812	1530800000	23	Q9Y606;G8JLB3;Q9Y606-2;F5H1S9;F5GY32;F5GXL3;F5H168;F8W9U5;F5H1B2	Q9Y606;G8JLB3;Q9Y606-2;F5H1S9	tRNA pseudouridine synthase A, mitochondrial;tRNA pseudouridine synthase
HNRNPH1	30.7926	30.4012	29.0909	0	323.31	85802000000	194	P31943;G8JLB6;E9PCY7;D6RBM0;D6RIU0;H0YB39;E5RGV0;D6RFM3;D6RIT2;D6RAM1;D6R9T0;D6RDU3;D6RJ04;D6RIH9;H0YBD7;E7EQJ0;E7EN40;D6RDL0;E5RGH4;D6RF17;H0YBG7;D6R9D3;H0YAQ2;E5RJ94	P31943;G8JLB6;E9PCY7;D6RBM0;D6RIU0;H0YB39	Heterogeneous nuclear ribonucleoprotein H;Heterogeneous nuclear ribonucleoprotein H, N-terminally processed
ERC1	22.7203	22.8346	21.5583	0	52.35	1308100000	38	Q8IUD2;X6RM00;G8JLD3;X6RLX0;Q8IUD2-4;Q8IUD2-2;Q8IUD2-3;Q8IUD2-5;K7EPP6;K7EPD6;O15083;H7C4G9;K7EIZ7	Q8IUD2;X6RM00;G8JLD3;X6RLX0;Q8IUD2-4;Q8IUD2-2;Q8IUD2-3;Q8IUD2-5	ELKS/Rab6-interacting/CAST family member 1
CDSN	19.2457	21.0171	20.1594	0.0098965	1.9834	91931000	1	Q15517;G8JLG2	Q15517;G8JLG2	Corneodesmosin
PPT2	23.1003	18.2007	18.1551	0.0003523	4.4636	80934000	2	G8JLL2;Q9UMR5-2;Q9UMR5;Q9UMR5-3;A2ABN7	G8JLL2;Q9UMR5-2;Q9UMR5;Q9UMR5-3;A2ABN7	Lysosomal thioesterase PPT2
KIAA0430	18.0502	16.4476	16.82	0.00034868	4.2569	55438000	7	Q9Y4F3;Q9Y4F3-5;G8JLP4;Q9Y4F3-3;Q9Y4F3-4;F8VVB8;F8VRS5;Q9Y4F3-6	Q9Y4F3;Q9Y4F3-5;G8JLP4;Q9Y4F3-3;Q9Y4F3-4;F8VVB8	Meiosis arrest female protein 1
COX7A2	25.1036	25.7521	26.0874	0	10.786	737310000	8	P14406;H0UI06;D6R9C3;D6RIE3;D6RGV5	P14406;H0UI06;D6R9C3;D6RIE3;D6RGV5	Cytochrome c oxidase subunit 7A2, mitochondrial
NELFCD;TH1L	25.3396	25.053	24.3341	0	65.421	3063800000	46	Q8IXH7;Q8IXH7-4;X6RLT1;H0UI80;Q8IXH7-3	Q8IXH7;Q8IXH7-4;X6RLT1;H0UI80	Negative elongation factor C/D
AMPD2	20.6256	21.6982	20.3605	0	8.5175	290940000	12	Q01433;Q01433-2;H0Y360;Q01433-3;Q01433-5;Q01433-4;E9PJF6;H0YCL9;E9PIJ1;H0YF16	Q01433;Q01433-2;H0Y360;Q01433-3;Q01433-5;Q01433-4	AMP deaminase 2
DPM1	26.7939	26.2388	25.0251	0	110.09	4596900000	46	O60762;Q5QPK2;H0Y368;Q5QPJ9	O60762;Q5QPK2;H0Y368	Dolichol-phosphate mannosyltransferase subunit 1
PCSK6	19.6158	19.2019	18.2617	0.0075664	2.1661	95218000	2	P29122;H7BXT3;H0Y3Q0;P29122-6;P29122-5;P29122-4;P29122-2;P29122-8;P29122-7	P29122;H7BXT3;H0Y3Q0;P29122-6;P29122-5;P29122-4;P29122-2;P29122-8;P29122-7	Proprotein convertase subtilisin/kexin type 6
IPO5	20.6057	18.5242	17.6963	0.00099502	3.3354	15956000	1	H0Y3V4	H0Y3V4
DDX39B	18.7117	21.6879	20.3222	0.0078486	2.1314	64561000	1	H0Y400	H0Y400
NCOR1	18.5218	20.6814	21.296	0.0022573	2.8758	39121000	3	H0Y459	H0Y459
NF1	18.2233	17.6331	20.433	0	11.434	261980000	6	P21359;P21359-2;H0Y465;P21359-6;J3KSB5;P21359-4;J3KSX8;J3KRT8;J3QQN8;J3QSG6	P21359;P21359-2;H0Y465;P21359-6;J3KSB5;P21359-4	Neurofibromin;Neurofibromin truncated
SIK3	19.6381	19.1453	16.9222	0	9.4375	72581000	3	J3KPC8;H0Y494;Q9Y2K2;Q9Y2K2-4;H7C3X8;H0Y4E8;Q9Y2K2-3	J3KPC8;H0Y494;Q9Y2K2;Q9Y2K2-4;H7C3X8;H0Y4E8;Q9Y2K2-3	Serine/threonine-protein kinase SIK3
MYD88	19.7127	21.54	20.3467	0.00051751	4.0647	99594000	2	Q99836;H0Y4G9;Q99836-3;Q99836-5;Q99836-6;Q99836-4;Q99836-2	Q99836;H0Y4G9;Q99836-3;Q99836-5;Q99836-6;Q99836-4;Q99836-2	Myeloid differentiation primary response protein MyD88
LACE1	20.6468	20.935	19.4782	0.00051352	3.9002	172320000	3	Q8WV93;H0Y5F4	Q8WV93;H0Y5F4	Lactation elevated protein 1
CABLES2	18.4391	19.9245	19.4112	0.00051073	3.7779	22880000	2	Q9BTV7;H0Y5H2	Q9BTV7;H0Y5H2	CDK5 and ABL1 enzyme substrate 2
ERGIC3	26.7693	26.0117	25.1476	0	42.628	3581700000	23	Q9Y282;H0Y5K5;Q9Y282-3;H0Y621;H0Y802;H0Y6Z0;Q9Y282-2;A6PVJ2	Q9Y282;H0Y5K5;Q9Y282-3;H0Y621;H0Y802;H0Y6Z0;Q9Y282-2	Endoplasmic reticulum-Golgi intermediate compartment protein 3
TRIM33	22.2628	22.4759	22.0027	0	27.396	1054200000	21	Q9UPN9;Q9UPN9-2;H0Y612;E7EN20	Q9UPN9;Q9UPN9-2;H0Y612;E7EN20	E3 ubiquitin-protein ligase TRIM33
ARFGAP3	17.6259	17.6506	17.0243	0	16.508	0	1	H0Y6A0	H0Y6A0
PYCRL	24.2034	24.3105	23.3491	0	9.4338	660510000	7	Q53H96;H0Y6C3;B5MD87;F8WEI0	Q53H96;H0Y6C3;B5MD87	Pyrroline-5-carboxylate reductase 3
SP3	21.2952	23.6553	18.3677	0	11.233	167660000	4	Q02447;Q02447-5;H0Y6K5;H0Y7L6;Q02447-4;Q02447-3;Q02447-6;Q02447-2	Q02447;Q02447-5;H0Y6K5;H0Y7L6;Q02447-4;Q02447-3;Q02447-6;Q02447-2	Transcription factor Sp3
ENTPD6	19.0803	19.4703	17.3246	0.0040964	2.4854	15979000	1	O75354;Q5QPJ4;Q5QPJ7;Q5QPI7;Q5QPJ6;Q5QPJ3;H0Y6Q1;Q5QPI9;O75354-2;O75354-3	O75354;Q5QPJ4;Q5QPJ7;Q5QPI7;Q5QPJ6;Q5QPJ3;H0Y6Q1;Q5QPI9;O75354-2;O75354-3	Ectonucleoside triphosphate diphosphohydrolase 6
TNRC6B	17.4773	18.4802	17.2781	0	17.403	14598000	1	Q9UPQ9;Q9UPQ9-1;Q9UPQ9-2;H0Y720	Q9UPQ9;Q9UPQ9-1;Q9UPQ9-2;H0Y720	Trinucleotide repeat-containing gene 6B protein
BPI	22.8931	22.3332	22.2835	0.0034921	2.6276	390080000	5	P17213;H0Y738	P17213;H0Y738	Bactericidal permeability-increasing protein
CALM1;CALM2	30.9698	31.3189	30.3533	0	209.9	57223000000	73	P62158;H0Y7A7;E7ETZ0;E7EMB3;Q96HY3;G3V361;M0QZ52;F8WBR5;G3V226;G3V479;P27482;P02585;C9J7T9	P62158;H0Y7A7;E7ETZ0;E7EMB3;Q96HY3;G3V361	Calmodulin
ARID1B	20.8503	20.8934	19.7562	0	16.7	413080000	15	Q8NFD5;Q8NFD5-3;H0Y7H8;Q8NFD5-2;Q8NFD5-4;H0Y3S9;H0Y2R3	Q8NFD5;Q8NFD5-3;H0Y7H8;Q8NFD5-2;Q8NFD5-4	AT-rich interactive domain-containing protein 1B
PISD	22.3032	23.0575	21.7126	0	12.393	556540000	14	Q9UG56;H0Y7P7;Q9UG56-2;B1AKM8;B1AKM6	Q9UG56;H0Y7P7;Q9UG56-2;B1AKM8;B1AKM6	Phosphatidylserine decarboxylase proenzyme;Phosphatidylserine decarboxylase alpha chain;Phosphatidylserine decarboxylase beta chain
STIM2	22.9156	21.1658	18.898	0	8.865	444210000	11	Q9P246;H7C5A5;H0Y860;R4GN82;R4GMP0;H7C5K2	Q9P246;H7C5A5;H0Y860	Stromal interaction molecule 2
ARHGEF5	17.9522	17.971	18.4039	0.00017784	4.6897	60384000	3	Q12774;H0Y895;Q12774-2	Q12774;H0Y895;Q12774-2	Rho guanine nucleotide exchange factor 5
NDFIP2	21.7771	22.339	21.6264	0	6.1004	258490000	7	Q9NV92;H0Y8A7;H7C5F7	Q9NV92;H0Y8A7;H7C5F7	NEDD4 family-interacting protein 2
DNPH1	26.0509	25.9497	25.0398	0	13.169	1396000000	10	O43598;H0Y8X4;O43598-2	O43598;H0Y8X4;O43598-2	2-deoxynucleoside 5-phosphate N-hydrolase 1
CBR4	23.1311	17.5282	21.7428	0.00050787	3.696	184650000	3	Q8N4T8;H0Y962;Q8N4T8-2	Q8N4T8;H0Y962;Q8N4T8-2	Carbonyl reductase family member 4
TXNDC15	23.9718	23.1562	22.1835	0	20.364	601520000	10	Q96J42;H0Y997;Q96J42-2;H0Y928	Q96J42;H0Y997;Q96J42-2;H0Y928	Thioredoxin domain-containing protein 15
FAM193B	21.0715	18.5114	17.1638	0.00067216	3.556	24021000	1	Q96PV7;H0Y9G1;H0YCX2;Q96PV7-2;Q96PV7-3	Q96PV7;H0Y9G1;H0YCX2;Q96PV7-2;Q96PV7-3	Protein FAM193B
PPIP5K2	18.1699	18.1655	16.5555	0	24.403	0	1	H0Y9S9;K7ENU7	H0Y9S9
TMA16	25.8874	25.7202	24.6634	0	21.901	1549300000	13	Q96EY4;H0Y9X1;D6RA57;D6RE67;D6RC31	Q96EY4;H0Y9X1;D6RA57	Translation machinery-associated protein 16
C5orf24	17.5023	21.3688	18.0002	0.0037921	2.5468	18956000	2	Q7Z6I8;Q7Z6I8-2;H0YAE0	Q7Z6I8;Q7Z6I8-2;H0YAE0	UPF0461 protein C5orf24
GALNT7	19.7921	17.2439	18.8491	0	6.5578	117410000	4	Q86SF2;H0YAH3;H0YAK0	Q86SF2;H0YAH3;H0YAK0	N-acetylgalactosaminyltransferase 7;Polypeptide N-acetylgalactosaminyltransferase
RBP1	19.0348	21.2488	18.8586	0.00050934	3.7258	24919000	2	P09455-3;H0YAK8;P09455;P09455-2	P09455-3;H0YAK8;P09455;P09455-2	Retinol-binding protein 1
ASAP1	19.0252	18.407	19.1768	0.00017937	4.9056	51104000	3	Q9ULH1;H0YBF7;Q9ULH1-2;O43150;O43150-2;H0YBY9	Q9ULH1;H0YBF7;Q9ULH1-2	Arf-GAP with SH3 domain, ANK repeat and PH domain-containing protein 1
TRAPPC9	19.7439	17.6917	17.2709	0	7.1518	31996000	6	Q96Q05;H0YBR0;Q96Q05-3;Q96Q05-2	Q96Q05;H0YBR0;Q96Q05-3;Q96Q05-2	Trafficking protein particle complex subunit 9
R3HCC1	19.4911	18.4329	17.6795	0.0016297	3.0416	12403000	1	Q9Y3T6;H0YBU3;Q9Y3T6-2	Q9Y3T6;H0YBU3;Q9Y3T6-2	R3H and coiled-coil domain-containing protein 1
PLCB1	21.1286	20.5848	16.8231	0	19.233	271940000	9	Q9NQ66;H0YCJ2;Q9NQ66-2;Q8IV92	Q9NQ66;H0YCJ2;Q9NQ66-2	1-phosphatidylinositol 4,5-bisphosphate phosphodiesterase beta-1;Phosphoinositide phospholipase C
ADAR	19.862	19.3807	18.3249	0	6.067	159720000	2	H0YCK3;P55265-2;P55265-3	H0YCK3;P55265-2;P55265-3	Double-stranded RNA-specific adenosine deaminase
ATG13	21.2907	21.0243	19.7197	0	17.385	172570000	2	O75143;H0YCL5;H0YEM7;O75143-4;O75143-3;O75143-2;O75143-5	O75143;H0YCL5;H0YEM7;O75143-4;O75143-3;O75143-2;O75143-5	Autophagy-related protein 13
TMEM63B	22.2171	18.7588	16.9076	0.00017759	4.6511	172830000	3	Q5T3F8;H0YCP6;H3BLW6;Q5T3F8-3;Q5T3F8-2	Q5T3F8;H0YCP6;H3BLW6;Q5T3F8-3;Q5T3F8-2	CSC1-like protein 2
DPH2	19.0536	19.379	19.2768	0.0005137	3.9127	49497000	3	Q9BQC3;H0YCR5;Q9BQC3-3	Q9BQC3;H0YCR5;Q9BQC3-3	Diphthamide biosynthesis protein 2
TAGLN	18.9294	18.6945	21.1033	0	13.343	106770000	4	Q01995;H0YCU9	Q01995;H0YCU9	Transgelin
USP33	18.7179	17.1653	18.1213	0.00099321	3.2868	54397000	1	Q8TEY7;H0YD08;H0YCV3;Q8TEY7-3;Q8TEY7-2	Q8TEY7;H0YD08;H0YCV3;Q8TEY7-3;Q8TEY7-2	Ubiquitin carboxyl-terminal hydrolase 33
CASC5	19.4214	18.285	16.7778	0.0063655	2.2524	27337000	2	Q8NG31;Q8NG31-2;H0YCZ2;Q8NG31-3;Q8NG31-4	Q8NG31;Q8NG31-2;H0YCZ2;Q8NG31-3;Q8NG31-4	Protein CASC5
CD44	25.7475	24.6111	24.8084	0	18.028	3274700000	22	P16070;P16070-12;H0YD13;P16070-18;P16070-14;P16070-13;P16070-11;P16070-10;P16070-16;P16070-8;P16070-17;P16070-6;P16070-4;P16070-3;P16070-7;P16070-5;H0Y2P0;H0YE40;H0YDW7;H0YCV9;H0Y5E4;P16070-15;P16070-9;E9PKC6;H0YDX6;H0YD17;J3KN83;Q86UZ1;P16070-19	P16070;P16070-12;H0YD13;P16070-18;P16070-14;P16070-13;P16070-11;P16070-10;P16070-16;P16070-8;P16070-17;P16070-6;P16070-4;P16070-3;P16070-7;P16070-5;H0Y2P0;H0YE40	CD44 antigen
MRPL49	22.6785	24.6476	24.3412	0	11.31	671410000	7	Q13405;H0YDP7;E9PNF1	Q13405;H0YDP7	39S ribosomal protein L49, mitochondrial
LMO7	22.1621	22.2303	20.5154	0	6.0287	219410000	7	H0YDQ3	H0YDQ3
SELH;C11orf31	24.262	22.9386	22.0421	0	7.3933	282310000	7	Q8IZQ5;H0YE28;H3BV83	Q8IZQ5;H0YE28	Selenoprotein H
TEAD1	21.5395	22.4902	22.6756	0	10.63	421580000	5	P28347;H0YE88;E9PKB7;Q15561;Q15562;P28347-2;H0YGS2;H0YG62;H0YEJ9;Q53GI4;Q15561-3;Q15562-2;Q15562-4	P28347;H0YE88;E9PKB7	Transcriptional enhancer factor TEF-1
GNPTG	20.8611	21.9518	20.3322	0.00098945	3.2226	111720000	3	Q9UJJ9;H0YEA7	Q9UJJ9;H0YEA7	N-acetylglucosamine-1-phosphotransferase subunit gamma
SSSCA1	23.2024	23.6112	22.621	0	6.1329	369920000	6	O60232;H0YEB6;E9PK41;H0YEK1;G3V1B8	O60232;H0YEB6;E9PK41;H0YEK1;G3V1B8	Sjoegren syndrome/scleroderma autoantigen 1
PICALM	23.3953	23.5949	21.6847	0	16.41	307140000	4	H0YEF7;H0YD48;H0YEH1;H0YE97;H0YEY8	H0YEF7;H0YD48;H0YEH1;H0YE97;H0YEY8
PUM1	20.1057	19.4213	17.8131	0.0074269	2.1996	71387000	3	Q14671;Q14671-4;H0YEH2;E9PR38;E9PMX1;H0YDC5;E9PM68;E9PL65	Q14671;Q14671-4;H0YEH2;E9PR38	Pumilio homolog 1
RASSF7	20.265	19.6233	18.0949	0.00017809	4.7184	61263000	0	Q02833;H0YEI0;Q02833-3;Q02833-2	Q02833;H0YEI0;Q02833-3;Q02833-2	Ras association domain-containing protein 7
GEMIN2	23.2448	23.341	21.558	0	9.8387	403000000	7	O14893;H0YEL0;O14893-3;O14893-2;H0YDP6	O14893;H0YEL0;O14893-3;O14893-2;H0YDP6	Gem-associated protein 2
NPAT	19.3022	18.4119	16.8903	0.0040881	2.4691	0	1	Q14207;H0YET3	Q14207;H0YET3	Protein NPAT
LRRK1	17.7714	19.9228	21.1206	0.0078558	2.1365	597570000	2	Q38SD2;H0YEW1	Q38SD2;H0YEW1	Leucine-rich repeat serine/threonine-protein kinase 1
C8orf82	23.098	21.6962	22.3086	0	11.493	397270000	4	Q6P1X6;H0YF29;Q6P1X6-2	Q6P1X6;H0YF29;Q6P1X6-2	UPF0598 protein C8orf82
CRIP2	21.5216	21.6492	17.9636	0	5.4794	56696000	2	P52943;H0YFA4;P52943-2	P52943;H0YFA4;P52943-2	Cysteine-rich protein 2
MPDZ	19.6771	17.9675	17.8568	0.0027161	2.7313	12303000	1	H0YGQ3;F8WDQ8	H0YGQ3
CHURC1-FNTB;CHURC1	22.1867	22.2358	21.1881	0	6.8115	297270000	7	H0YHI0;H0YID9;H0YHA3;P49356;H0YJ25;H0YHB4;H0YIM3;Q8WUH1-3;P49356-2	H0YHI0;H0YID9;H0YHA3
METTL7A	25.3121	25.2447	24.4547	0	48.587	1236600000	17	Q9H8H3;H0YI09;F8VQX6	Q9H8H3;H0YI09;F8VQX6	Methyltransferase-like protein 7A
KIF21A	19.64	17.8888	20.7842	0.0011494	3.1578	66833000	2	H0YI78	H0YI78
LETMD1	26.2961	25.5894	24.3703	0	10.902	1952500000	9	H0YIV5	H0YIV5
GATC	23.5705	23.7879	23.4737	0	41.601	410600000	16	H0YIV9;O43716;F8VRU3	H0YIV9;O43716;F8VRU3	Glutamyl-tRNA(Gln) amidotransferase subunit C, mitochondrial
DHRS7	28.7162	28.4599	27.2871	0	92.783	21091000000	77	Q9Y394;H0YJ66;Q9Y394-2;H0YJR8;H0YJE4	Q9Y394;H0YJ66;Q9Y394-2;H0YJR8	Dehydrogenase/reductase SDR family member 7
ABCD4	19.5222	18.6746	18.8102	0.0005176	4.0732	41104000	1	O14678;H0YJ82	O14678;H0YJ82	ATP-binding cassette sub-family D member 4
UBR7	18.7703	19.9221	21.0449	0.0051514	2.3407	92016000	2	Q8N806;H0YJM2;H0YJY4;H0YJA0;G3V3Q6;G3V2G3;E9PCJ7	Q8N806;H0YJM2;H0YJY4;H0YJA0;G3V3Q6;G3V2G3;E9PCJ7	Putative E3 ubiquitin-protein ligase UBR7
EMC4	22.7334	22.4043	16.4686	0.00018008	4.9783	145610000	4	Q5J8M3;H0YK61;S4R329;H0YNK0;H0YNK8;H0YLP8;Q5J8M3-3;Q5J8M3-2	Q5J8M3;H0YK61;S4R329;H0YNK0;H0YNK8;H0YLP8;Q5J8M3-3;Q5J8M3-2	ER membrane protein complex subunit 4
TINF2	20.7114	18.9775	17.5943	0	5.5376	71136000	3	Q9BSI4;H0YKA6;Q9BSI4-2;H0YKG7	Q9BSI4;H0YKA6;Q9BSI4-2;H0YKG7	TERF1-interacting nuclear factor 2
CERS4	24.1933	23.0208	21.3655	0	7.4785	1002800000	7	Q9HA82;H0YLY3;H0YKR4;H0YNR6;H0YN04;H0YKC9;H0YMY6	Q9HA82;H0YLY3;H0YKR4;H0YNR6;H0YN04;H0YKC9;H0YMY6	Ceramide synthase 4
TSPAN3	25.1099	18.4406	24.048	0.003336	2.6392	701920000	4	O60637;H0YKJ9;O60637-3;O60637-2;H0YMH8	O60637;H0YKJ9;O60637-3;O60637-2;H0YMH8	Tetraspanin-3
TLE3	19.9745	21.4035	21.0007	0	19.961	272340000	9	Q04726;Q04726-3;Q04726-2;H0YKT5;H0YKN8;H0YL70;Q04726-7;Q04726-6;Q04726-5;Q04726-4;H0YLI3;H0YKH0;H0YLW9	Q04726;Q04726-3;Q04726-2;H0YKT5;H0YKN8;H0YL70;Q04726-7;Q04726-6;Q04726-5;Q04726-4;H0YLI3	Transducin-like enhancer protein 3
APH1B	22.8006	22.3114	19.4451	0.00099602	3.3537	78491000	2	Q8WW43;H0YKZ9;H0YLT0;Q8WW43-2	Q8WW43;H0YKZ9;H0YLT0;Q8WW43-2	Gamma-secretase subunit APH-1B
ZFAND6	18.0235	24.3897	23.1131	0	11.75	218500000	5	H0YMR5;H0YLR2;Q6FIF0;H0YME2;H0YK21;H0YK54;Q6FIF0-2	H0YMR5;H0YLR2;Q6FIF0;H0YME2;H0YK21;H0YK54;Q6FIF0-2	AN1-type zinc finger protein 6
GMPR2	24.5068	24.4953	23.6079	0	20.266	1230100000	18	Q9P2T1;Q6PKC0;H0YMB3;H0YLV5;H0YNJ6;Q9P2T1-2;Q9P2T1-3;H0YN22;H0YK13;H0YMW6;H0YNS9;H0YK71;H0YLB8;H0YNH0;H0YMR9;H0YMV5;H0YL68;H0YKE1;H0YMG3;H0YKK3;H0YN74	Q9P2T1;Q6PKC0;H0YMB3;H0YLV5;H0YNJ6;Q9P2T1-2;Q9P2T1-3	GMP reductase 2;GMP reductase
ANKRD17	20.1899	19.7806	19.0172	0	15.834	306230000	9	O75179;H0YM23;O75179-6;O75179-7;O75179-2;O75179-4;H0YLQ3;O75179-5;O75179-3	O75179;H0YM23;O75179-6;O75179-7;O75179-2;O75179-4	Ankyrin repeat domain-containing protein 17
ZNF592	21.5346	20.2274	19.5566	0	11.677	433380000	10	Q92610;H0YM74	Q92610;H0YM74	Zinc finger protein 592
KIAA0101	22.6588	25.2901	23.4389	0	14.172	428840000	7	Q15004;H0YMA4;H0YKX3;Q15004-2	Q15004;H0YMA4;H0YKX3	PCNA-associated factor
ALDH1A2	22.8353	22.044	18.3157	0.0021022	2.937	383200000	3	O94788;H0YMG7;O94788-4;O94788-2;O94788-3;Q9UED3;H0YKL3	O94788;H0YMG7;O94788-4;O94788-2;O94788-3	Retinal dehydrogenase 2
USP3	21.4434	21.1014	20.7076	0	8.5079	1864900000	4	Q9Y6I4;Q6JHV3;H0YMI4;H0YLB7;H0YKU8;Q9Y6I4-2;H0YL81;H0YMP6	Q9Y6I4;Q6JHV3;H0YMI4;H0YLB7;H0YKU8;Q9Y6I4-2	Ubiquitin carboxyl-terminal hydrolase 3;Ubiquitin carboxyl-terminal hydrolase
WDR73	20.198	21.1727	17.6535	0.0081164	2.0713	102810000	2	Q6P4I2;H0YMT3	Q6P4I2;H0YMT3	WD repeat-containing protein 73
RPS27L	29.9683	30.0958	28.9789	0	26.701	14934000000	32	Q71UM5;H0YMV8;C9JLI6;C9J1C5	Q71UM5;H0YMV8;C9JLI6	40S ribosomal protein S27-like;40S ribosomal protein S27
ANP32A	28.8755	29.0023	28.391	0	75.022	15077000000	47	P39687;H0YN26;H7BZ09;O43423;O95626	P39687;H0YN26	Acidic leucine-rich nuclear phosphoprotein 32 family member A
SEC11A	27.2836	26.4417	25.7242	0	45.616	3581600000	26	P67812;H0YNG3;P67812-4;P67812-3;P67812-2;H0YNX5;H0YKT4;H0YNA5;P0C7V7	P67812;H0YNG3;P67812-4;P67812-3;P67812-2;H0YNX5;H0YKT4;H0YNA5	Signal peptidase complex catalytic subunit SEC11A;Signal peptidase complex catalytic subunit SEC11;Signal peptidase I
GLCE	18.9323	21.8685	16.6558	0	7.2888	162270000	5	O94923;H0YNP1	O94923;H0YNP1	D-glucuronyl C5-epimerase
HDDC3	23.6941	23.954	23.828	0	13.299	414750000	8	Q8N4P3;H0YNP9;Q8N4P3-2;H0YKT9	Q8N4P3;H0YNP9;Q8N4P3-2;H0YKT9	Guanosine-3,5-bis(diphosphate) 3-pyrophosphohydrolase MESH1
TCF12	19.6538	20.6867	16.7335	0.0024096	2.816	86113000	1	Q99081;Q99081-3;H0YNQ5	Q99081;Q99081-3;H0YNQ5	Transcription factor 12
BLM	22.0484	21.5409	21.2863	0	16.702	984130000	19	P54132;H0YNU5;H0YLV8	P54132;H0YNU5	Bloom syndrome protein
DDX17	29.0874	28.7411	27.5359	0	155.26	56900000000	152	Q92841;H3BLZ8;Q92841-3;Q92841-1;Q92841-2	Q92841;H3BLZ8;Q92841-3;Q92841-1;Q92841-2	Probable ATP-dependent RNA helicase DDX17
NUB1	20.786	22.4017	21.1158	0	22.29	326630000	16	Q9Y5A7;H3BM14;H3BM74;Q9Y5A7-2;C9JRT6;F8WDB6;C9J7X7;H7C5N1	Q9Y5A7;H3BM14;H3BM74;Q9Y5A7-2;C9JRT6;F8WDB6	NEDD8 ultimate buster 1
MLST8	19.2726	22.5834	21.534	0.00051423	3.9375	150830000	3	Q9BVC4;Q9BVC4-4;H3BM50;H3BPU5;H3BPT1;H3BN58;Q9BVC4-5;H3BR25;H3BSZ4;Q9BVC4-3	Q9BVC4;Q9BVC4-4;H3BM50;H3BPU5;H3BPT1;H3BN58;Q9BVC4-5;H3BR25;H3BSZ4;Q9BVC4-3	Target of rapamycin complex subunit LST8
ARPP19	22.3525	21.0275	21.7078	0	8.1207	104670000	3	P56211;H3BMD8;H3BQ52;P56211-2;H3BTD3	P56211;H3BMD8;H3BQ52;P56211-2;H3BTD3	cAMP-regulated phosphoprotein 19
SPNS1	24.3459	23.2475	22.7112	0	5.925	604320000	10	Q9H2V7;Q9H2V7-3;H3BMF4;Q9H2V7-2;H3BPT8;Q9H2V7-4;H3BT44;H3BPQ9;H3BR82;Q9H2V7-5	Q9H2V7;Q9H2V7-3;H3BMF4;Q9H2V7-2;H3BPT8;Q9H2V7-4	Protein spinster homolog 1
WDR59	18.6049	18.2497	17.9989	0.003491	2.6233	66368000	3	Q6PJI9;H3BV71;H3BMH3;Q6PJI9-3;Q6PJI9-2	Q6PJI9;H3BV71;H3BMH3;Q6PJI9-3;Q6PJI9-2	WD repeat-containing protein 59
VPS33A	21.9341	21.6892	21.6691	0	11.971	1030200000	11	Q96AX1;H3BMM5;F5H6Y0;F5H2X5;F5H7N5	Q96AX1;H3BMM5	Vacuolar protein sorting-associated protein 33A
RNPS1	28.1076	27.4681	26.0708	0	32.642	8789700000	38	Q15287;H3BV80;H3BMM9;H3BTC0;Q15287-3;Q15287-2;H3BPG5;H3BMS0;H3BRK4;H3BTV0;H3BNI3;H3BP82;H3BTR6;H3BUG0;H3BTY0;H3BNU7;H3BUL0	Q15287;H3BV80;H3BMM9;H3BTC0;Q15287-3;Q15287-2;H3BPG5;H3BMS0	RNA-binding protein with serine-rich domain 1
TSC2	19.7718	21.141	19.6324	0	32.326	490610000	19	P49815;P49815-3;P49815-4;H3BMQ0;P49815-5;P49815-2;P49815-7;P49815-6;P49815-8;I3L3B1;Q5HYF7;H3BQK4	P49815;P49815-3;P49815-4;H3BMQ0;P49815-5;P49815-2;P49815-7;P49815-6	Tuberin
PLA2G15	20.925	19.6808	18.4689	0.0027174	2.7367	50965000	2	Q8NCC3;H3BMU8;Q8NCC3-2	Q8NCC3;H3BMU8;Q8NCC3-2	Group XV phospholipase A2
BLOC1S6	23.4125	23.6782	19.1963	0	10.109	122940000	2	Q9UL45;H3BPR6;H3BU57;H3BN13;H3BST1;Q9UL45-2	Q9UL45;H3BPR6;H3BU57;H3BN13;H3BST1;Q9UL45-2	Biogenesis of lysosome-related organelles complex 1 subunit 6
ZFYVE19	21.1216	20.1015	20.3842	0.00034916	4.2868	197950000	4	Q96K21;Q96K21-3;H3BN64;H3BRM1;H3BRF9;Q96K21-4;Q96K21-2;H3BUW6	Q96K21;Q96K21-3;H3BN64;H3BRM1;H3BRF9;Q96K21-4;Q96K21-2;H3BUW6	Abscission/NoCut checkpoint regulator
RPS15A	23.6369	24.2234	21.9704	0.0005168	4.041	416440000	4	H3BN98;I3L246;H3BV27;H3BT37;I3L303;Q15041;H3BPJ2;F5GXP4	H3BN98;I3L246
MPHOSPH6	23.7839	23.3851	21.9174	0	5.8666	317950000	5	Q99547;H3BNT4;H3BNK8;H3BU96;H3BSB3	Q99547;H3BNT4;H3BNK8;H3BU96;H3BSB3	M-phase phosphoprotein 6
ZNF106	17.8438	17.6572	16.9486	0	6.7668	52727000	3	Q9H2Y7;H3BNX5	Q9H2Y7;H3BNX5	Zinc finger protein 106
TRAPPC2L	19.4151	18.1666	18.1204	0.0090049	2.0276	0	1	Q9UL33;H3BPN3;H3BUK6;H3BP13;Q9UL33-2	Q9UL33;H3BPN3;H3BUK6;H3BP13;Q9UL33-2	Trafficking protein particle complex subunit 2-like protein
HEXA	25.2665	24.9353	23.7424	0	42.427	3226300000	28	P06865;H3BP20;H3BS10;H3BU85;H3BTD4;P06865-2	P06865;H3BP20;H3BS10;H3BU85;H3BTD4	Beta-hexosaminidase subunit alpha;Beta-hexosaminidase
MACF1	22.7079	22.4757	20.9748	0	323.31	8048100000	186	H3BPE1;H3BQK9;Q9UPN3-2;Q9UPN3-3;Q9UPN3;Q9UPN3-4;H0Y390;Q9UPN3-5;E9PNZ4;E9PLY5;E9PLY0;H0Y314;H0Y4F5;H0Y6T5;H0Y7I1;E9PS75	H3BPE1;H3BQK9;Q9UPN3-2;Q9UPN3-3;Q9UPN3;Q9UPN3-4;H0Y390;Q9UPN3-5	Microtubule-actin cross-linking factor 1, isoforms 1/2/3/5
FUS	29.33	29.7299	28.4077	0	39.56	31943000000	51	P35637;H3BPE7;P35637-2	P35637;H3BPE7;P35637-2	RNA-binding protein FUS
NDUFB10	26.8716	26.2114	25.7529	0	31.168	2864100000	18	O96000;H3BPJ9;O96000-2;H3BV16	O96000;H3BPJ9;O96000-2;H3BV16	NADH dehydrogenase [ubiquinone] 1 beta subcomplex subunit 10
HAGH	25.3965	25.0758	23.7371	0	25.15	2026800000	28	Q16775;H3BPK3;Q16775-2;H3BPQ4;H3BQW8;H3BV79;Q16775-3	Q16775;H3BPK3;Q16775-2;H3BPQ4	Hydroxyacylglutathione hydrolase, mitochondrial
CLN3	25.5953	24.9275	24.2152	0	17.911	1286300000	13	Q13286;H3BPM8;Q13286-4;Q13286-2;Q13286-3;Q9UBD8;Q13286-5;B4DXL3;Q13286-6;O95090;B4DFF3;H3BPL0;H3BRU8;Q9UBH5;H3BNK7;H3BR84;Q2TA70;H3BQ48;B4DMY6	Q13286;H3BPM8;Q13286-4;Q13286-2;Q13286-3;Q9UBD8;Q13286-5;B4DXL3;Q13286-6;O95090;B4DFF3	Battenin
CMC2	25.2851	24.9798	18.2477	0.0072868	2.2251	460430000	3	Q9NRP2;H3BPP2	Q9NRP2;H3BPP2	COX assembly mitochondrial protein 2 homolog
TBC1D24	20.2007	21.2059	19.5969	0	6.4266	155570000	4	Q9ULP9;H3BQ06;Q9ULP9-2;H3BV07	Q9ULP9;H3BQ06;Q9ULP9-2	TBC1 domain family member 24
SNX29	18.2023	17.1218	18.025	0.0081151	2.0713	31368000	2	Q8TEQ0;H3BQF0;Q8TEQ0-2	Q8TEQ0;H3BQF0;Q8TEQ0-2	Sorting nexin-29
COG8	23.0465	22.5676	18.5931	0	34.24	465740000	10	Q96MW5;H3BQV3;H3BMQ9	Q96MW5;H3BQV3	Conserved oligomeric Golgi complex subunit 8
NSMCE1	19.9217	17.3491	16.7022	0	11.035	0	1	Q8WV22;H3BSL0;H3BR73;I3L1I3	Q8WV22;H3BSL0;H3BR73;I3L1I3	Non-structural maintenance of chromosomes element 1 homolog
UBFD1	25.35	25.9986	23.8025	0	32.105	1689700000	23	O14562;H3BRL3;H3BUM8	O14562;H3BRL3;H3BUM8	Ubiquitin domain-containing protein UBFD1
NTHL1	21.5665	19.496	20.2425	0	6.0761	110460000	3	P78549;H3BRL9;P78549-3;P78549-2	P78549;H3BRL9;P78549-3;P78549-2	Endonuclease III-like protein 1
ABAT	25.3307	24.4364	23.7814	0	58.474	2865200000	36	P80404;H3BRN4;H3BNQ7;H3BPW8;H3BRJ1;H3BMJ9;H3BRT1	P80404;H3BRN4;H3BNQ7	4-aminobutyrate aminotransferase, mitochondrial
GFER	23.6201	23.9159	22.6523	0	21.829	357370000	16	P55789;H3BRW3;H3BRD2	P55789;H3BRW3;H3BRD2	FAD-linked sulfhydryl oxidase ALR;Sulfhydryl oxidase
CBFB	17.4577	24.4091	17.9673	0.00051626	4.0286	272630000	4	Q13951;Q13951-2;H3BSC0;J3KRT0;J3KS23	Q13951;Q13951-2;H3BSC0;J3KRT0;J3KS23	Core-binding factor subunit beta
C16orf58	25.9364	21.7	22.3809	0	9.6108	1351800000	7	Q96GQ5;H3BSM7;H3BR29;B4DJP2;I3L2V0;H3BTA0;H3BS97;Q96GQ5-2	Q96GQ5;H3BSM7;H3BR29;B4DJP2	RUS1 family protein C16orf58
LRRC57	21.2063	20.8412	20.3286	0.0013102	3.1061	90820000	2	Q8N9N7;H3BSW0	Q8N9N7;H3BSW0	Leucine-rich repeat-containing protein 57
CTU2	21.2417	19.6952	19.0436	0.00035255	4.4824	123990000	3	Q2VPK5;H3BSW6;Q2VPK5-3;Q2VPK5-5	Q2VPK5;H3BSW6;Q2VPK5-3;Q2VPK5-5	Cytoplasmic tRNA 2-thiolation protein 2
ORC6	20.7693	22.5473	21.5981	0.00051796	4.0892	231030000	2	Q9Y5N6;H3BT22	Q9Y5N6;H3BT22	Origin recognition complex subunit 6
ACSM2B;ACSM2A	18.5775	19.5519	19.8444	0	15.162	151080000	12	Q68CK6;H3BTX9;Q08AH3;F5GWL3;H3BP39;H3BRR3	Q68CK6;H3BTX9;Q08AH3;F5GWL3	Acyl-coenzyme A synthetase ACSM2B, mitochondrial;Acyl-coenzyme A synthetase ACSM2A, mitochondrial
TIPIN	18.4576	20.7698	19.4038	0.00018106	5.1033	17879000	2	Q9BVW5;H3BU04	Q9BVW5;H3BU04	TIMELESS-interacting protein
CDR2	20.4009	21.0059	17.1846	0	25.912	98791000	3	Q01850;H3BU23;H3BN65;H3BTR1	Q01850;H3BU23;H3BN65;H3BTR1	Cerebellar degeneration-related protein 2
CLN6	24.7894	24.9022	24.2785	0	23.299	813490000	12	Q9NWW5;H3BUV4;H3BRN7;H3BNF1;H3BTY4;H3BUT1;Q9NWW5-2	Q9NWW5;H3BUV4;H3BRN7;H3BNF1;H3BTY4;H3BUT1	Ceroid-lipofuscinosis neuronal protein 6
GABARAP	20.1907	24.1972	23.248	0.0055996	2.2797	131380000	1	O95166;H6UMI1;I3L3J4	O95166;H6UMI1	Gamma-aminobutyric acid receptor-associated protein
SAP130	23.4742	23.2129	22.5051	0	19.813	1002800000	17	Q9H0E3;H7BXF5;Q9H0E3-3;Q9H0E3-2;C9J683	Q9H0E3;H7BXF5;Q9H0E3-3;Q9H0E3-2	Histone deacetylase complex subunit SAP130
ESYT2	24.5161	23.2177	22.1055	0	69.09	2377600000	41	H7BXI1;A0FGR8-2;A0FGR8-6;A0FGR8;A0FGR8-5;A0FGR8-4	H7BXI1;A0FGR8-2;A0FGR8-6;A0FGR8;A0FGR8-5;A0FGR8-4	Extended synaptotagmin-2
NKIRAS2	21.3569	20.8893	19.9157	0.00051511	3.9658	127750000	4	Q9NYR9;H7BXP1;Q9NYR9-3;Q9NYR9-2;Q9NYR9-4;K7EKE9;K7ER26;K7ELL8;K7ERG2	Q9NYR9;H7BXP1;Q9NYR9-3;Q9NYR9-2;Q9NYR9-4;K7EKE9;K7ER26;K7ELL8;K7ERG2	NF-kappa-B inhibitor-interacting Ras-like protein 2
KALRN	19.1322	19.3277	17.6365	0	19.627	266570000	15	O60229;H7BXZ5;J3QSW6;O60229-5;O60229-6;O60229-4;E7EUZ8;O75962;E7EWP2;O75962-5;O75962-2;O75962-4;C9J1B4;H7C0I9;F5H228;C9IZQ6;E7EPJ7;O60229-2	O60229;H7BXZ5;J3QSW6;O60229-5;O60229-6;O60229-4;E7EUZ8	Kalirin
PCMT1	28.1508	28.6512	27.3988	0	96.319	13544000000	64	P22061;H7BY58;P22061-2;B7Z972;F8WDT3;F8WAV5;F8WAX2;H7C4X2;C9J0F2	P22061;H7BY58;P22061-2;B7Z972	Protein-L-isoaspartate(D-aspartate) O-methyltransferase;Protein-L-isoaspartate O-methyltransferase
WDR44	19.2575	20.1479	18.3124	0.00052029	4.1633	106100000	2	Q5JSH3;H7BY83;Q5JSH3-4;Q5JSH3-2;Q5JSH3-3	Q5JSH3;H7BY83;Q5JSH3-4;Q5JSH3-2;Q5JSH3-3	WD repeat-containing protein 44
PAM	19.8484	18.8112	17.5325	0	5.3387	91379000	4	P19021;P19021-5;H7BYD9;P19021-2;P19021-4;P19021-3;P19021-6;H0Y9I4	P19021;P19021-5;H7BYD9;P19021-2;P19021-4;P19021-3;P19021-6;H0Y9I4	Peptidyl-glycine alpha-amidating monooxygenase;Peptidylglycine alpha-hydroxylating monooxygenase;Peptidyl-alpha-hydroxyglycine alpha-amidating lyase
WRB	21.7689	21.1181	18.2619	0.00066934	3.4952	64345000	2	O00258;H7BYE5;O00258-2;H7C384	O00258;H7BYE5;O00258-2;H7C384	Tail-anchored protein insertion receptor WRB
NUPL1	25.8672	24.8054	23.5343	0	57.603	1579000000	20	Q9BVL2;Q5JRG1;H7BYF2;Q9BVL2-2;Q9BVL2-3	Q9BVL2;Q5JRG1;H7BYF2;Q9BVL2-2;Q9BVL2-3	Nucleoporin p58/p45
CSNK1D;CSNK1E	23.7744	22.9478	21.9402	0	19.336	792730000	15	P48730;P48730-2;H7BYT1;B0QY36;B0QY35;B0QY34;J3QQI9;H0Y645;H0Y2N6;B4DLF1	P48730;P48730-2;H7BYT1;B0QY36;B0QY35;B0QY34;J3QQI9;H0Y645	Casein kinase I isoform delta
TPM1	25.2723	25.2004	23.7014	0	11.382	1665600000	11	H7BYY1;F5H7S3;B7Z596;P09493-2;H0YK48;P09493-5;H0YNC7;H0YL42;H0YN06	H7BYY1;F5H7S3;B7Z596;P09493-2;H0YK48;P09493-5;H0YNC7	Tropomyosin alpha-1 chain
BCOR	17.5784	17.6771	15.7805	0.0003518	4.439	37471000	2	Q6W2J9;H7BYY2;Q6W2J9-3;Q6W2J9-4;Q6W2J9-2	Q6W2J9;H7BYY2;Q6W2J9-3;Q6W2J9-4;Q6W2J9-2	BCL-6 corepressor
PPIL3	23.5553	23.6354	21.5266	0	10.43	420850000	7	Q9H2H8;H7BZ14;B8ZZ77;Q9H2H8-2;C9K058	Q9H2H8;H7BZ14;B8ZZ77;Q9H2H8-2	Peptidyl-prolyl cis-trans isomerase-like 3;Peptidyl-prolyl cis-trans isomerase
PDIA3	28.1203	27.1742	26.9558	0	10.814	6817100000	11	H7BZJ3	H7BZJ3
USP46;USP12	21.2557	20.5108	16.7372	0.00018146	5.1476	102200000	6	H7BZK6;P62068-2;P62068-4;P62068-3;P62068;O75317	H7BZK6;P62068-2;P62068-4;P62068-3;P62068;O75317	Ubiquitin carboxyl-terminal hydrolase 46;Ubiquitin carboxyl-terminal hydrolase 12
OTUD5	22.0739	21.9726	20.5888	0	10.791	334310000	7	Q96G74;H7BZQ3;Q96G74-4;Q96G74-2;Q96G74-3;Q96G74-5	Q96G74;H7BZQ3;Q96G74-4;Q96G74-2;Q96G74-3;Q96G74-5	OTU domain-containing protein 5
SUMO2	30.0241	30.3445	29.5139	0	13.508	7972000000	14	P61956;H7BZT4;P61956-2;Q6EEV6	P61956;H7BZT4;P61956-2	Small ubiquitin-related modifier 2
MDFIC	25.8087	25.3176	17.8036	0.00018142	5.1454	1441000000	4	Q9P1T7;Q9P1T7-1;H7C4B9;H7BZY3;J3KN13;C9J784	Q9P1T7;Q9P1T7-1;H7C4B9;H7BZY3;J3KN13;C9J784	MyoD family inhibitor domain-containing protein
ABHD5	22.1784	21.2325	21.2374	0.00017806	4.7119	255820000	5	Q8WTS1;H7BZY9	Q8WTS1;H7BZY9	1-acylglycerol-3-phosphate O-acyltransferase ABHD5
YIPF4	24.6261	24.7727	22.8595	0.00052065	4.1697	614680000	4	Q9BSR8;H7C0D5	Q9BSR8;H7C0D5	Protein YIPF4
ZPR1	23.1706	23.9738	23.8189	0	51.645	1494600000	31	O75312;H7C0E5;H7BZM7;H7C449	O75312;H7C0E5;H7BZM7	Zinc finger protein ZPR1
	22.573	22.5004	20.186	0	64.061	212010000	6	H7C0S8;O75575;O75575-2;O75575-3	H7C0S8
AP1S1	20.8019	21.7776	21.1147	0	5.7474	76938000	3	P61966;H7C1E4;P61966-2	P61966;H7C1E4;P61966-2	AP-1 complex subunit sigma-1A
UHRF1BP1	27.0428	19.6076	16.8212	0	6.0589	9380500000	3	Q6BDS2;H7C1J4	Q6BDS2;H7C1J4	UHRF1-binding protein 1
DNTTIP1	22.869	21.7832	20.3893	0	5.7755	336210000	7	Q9H147;H7C1M5;F2Z2A4;H7C1J2;H0Y501	Q9H147;H7C1M5;F2Z2A4;H7C1J2	Deoxynucleotidyltransferase terminal-interacting protein 1
BET1;DKFZp781C0425	22.8866	23.9771	22.9439	0	6.7868	97009000	4	O15155;H7C1N3;C9JTT8;Q68DU7;O15155-2	O15155;H7C1N3;C9JTT8;Q68DU7;O15155-2	BET1 homolog
CC2D1B	19.2831	21.5241	20.0414	0	9.8401	213780000	4	Q5T0F9;H7C1U3;Q5T0F9-2;H0Y517;Q5T0F9-3;Q5T0F9-4	Q5T0F9;H7C1U3;Q5T0F9-2;H0Y517;Q5T0F9-3	Coiled-coil and C2 domain-containing protein 1B
CTDSP1;CTDSPL	21.5427	20.7855	22.2534	0.00035398	4.5873	115170000	3	Q9GZU7;H7C270;H7C1Z7;Q9GZU7-3;Q9GZU7-2;O15194;H7C2S4;O15194-2	Q9GZU7;H7C270;H7C1Z7;Q9GZU7-3;Q9GZU7-2;O15194;H7C2S4;O15194-2	Carboxy-terminal domain RNA polymerase II polypeptide A small phosphatase 1;CTD small phosphatase-like protein
FKBP14	21.8829	20.8469	21.0543	0.00018067	5.0544	139840000	5	Q9NWM8;H7C1Z9;F8WBZ0	Q9NWM8;H7C1Z9;F8WBZ0	Peptidyl-prolyl cis-trans isomerase FKBP14;Peptidyl-prolyl cis-trans isomerase
R3HDM1	20.2246	20.8131	17.375	0.0078534	2.1349	0	2	Q15032;H7C207;Q15032-2;Q15032-4;Q15032-3	Q15032;H7C207;Q15032-2;Q15032-4;Q15032-3	R3H domain-containing protein 1
ANKRD44	20.7143	20.0007	19.4598	0	5.9349	198750000	5	Q8N8A2;H7C209;J3KN93;Q8N8A2-2;Q8N8A2-4;H7C3P1;H7C4A0;Q8N8A2-5;Q8N8A2-3	Q8N8A2;H7C209;J3KN93;Q8N8A2-2;Q8N8A2-4	Serine/threonine-protein phosphatase 6 regulatory ankyrin repeat subunit B
TRMT61B	20.2737	17.896	19.1858	0.00067374	3.5843	50327000	3	Q9BVS5;H7C2E8	Q9BVS5;H7C2E8	tRNA (adenine(58)-N(1))-methyltransferase, mitochondrial
CD99	18.769	22.173	18.3931	0	6.4672	28372000	3	H7C2F2	H7C2F2
EBNA1BP2	27.6906	26.9193	25.596	0	55.325	7244000000	68	Q99848;H7C2Q8	Q99848;H7C2Q8	Probable rRNA-processing protein EBP2
DFNB59	22.7045	21.5793	18.4258	0.0051466	2.3273	305710000	3	Q0ZLH3;H7C3A9	Q0ZLH3;H7C3A9	Pejvakin
FAM134A	19.2949	17.2248	20.1377	0.0036392	2.5686	18458000	1	Q8NC44;H7C3D5	Q8NC44;H7C3D5	Protein FAM134A
STRADB	18.8406	18.7655	18.678	0.0027131	2.7177	9646100	1	Q9C0K7;H7C3S5;Q9C0K7-3;Q9C0K7-2	Q9C0K7;H7C3S5;Q9C0K7-3;Q9C0K7-2	STE20-related kinase adapter protein beta
MYO7A	17.7346	17.5368	15.9598	0.00051993	4.1482	65750000	1	Q13402;H7C4D8;Q13402-5;Q13402-8;Q13402-2;Q13402-7;Q13402-6	Q13402;H7C4D8;Q13402-5;Q13402-8;Q13402-2;Q13402-7;Q13402-6	Unconventional myosin-VIIa
ALG12	21.6739	17.2214	17.7562	0.0016279	3.0344	88520000	2	Q9BV10;H7C4I6	Q9BV10;H7C4I6	Dol-P-Man:Man(7)GlcNAc(2)-PP-Dol alpha-1,6-mannosyltransferase
MAGI1	20.2457	18.46	16.6719	0	6.1831	119310000	3	Q96QZ7;Q96QZ7-3;H7C5T8;H7C4U7;H7C535;Q96QZ7-4;Q96QZ7-5;Q96QZ7-7;Q96QZ7-6;Q96QZ7-2	Q96QZ7;Q96QZ7-3;H7C5T8;H7C4U7;H7C535;Q96QZ7-4;Q96QZ7-5;Q96QZ7-7;Q96QZ7-6;Q96QZ7-2	Membrane-associated guanylate kinase, WW and PDZ domain-containing protein 1
XRN1	22.0666	23.8067	22.553	0.00034922	4.2916	2099400000	6	Q8IZH2;Q8IZH2-2;H7C5E4	Q8IZH2;Q8IZH2-2;H7C5E4	5-3 exoribonuclease 1
IAH1	18.0742	19.4784	16.4048	0.0060597	2.2609	0	1	Q2TAA2;H7C5G1;Q2TAA2-2	Q2TAA2;H7C5G1;Q2TAA2-2	Isoamyl acetate-hydrolyzing esterase 1 homolog
PARP14	20.6254	18.923	20.5602	0	22.575	522620000	13	Q460N5;H7C5R8;Q460N5-3;Q460N5-4;Q460N5-1;Q460N5-5	Q460N5;H7C5R8;Q460N5-3;Q460N5-4;Q460N5-1	Poly [ADP-ribose] polymerase 14
MRPL27	25.3714	24.9024	25.0373	0	13.518	1012600000	14	Q9P0M9;H7C5U8;D6RAN8;D6RE11;B3KN43	Q9P0M9;H7C5U8;D6RAN8	39S ribosomal protein L27, mitochondrial
SEPN1	20.8915	21.2063	20.669	0.0069811	2.2336	185590000	2	Q9NZV5;Q9NZV5-2;H9KV50	Q9NZV5;Q9NZV5-2;H9KV50	Selenoprotein N
TNRC18	18.1345	16.7024	19.0861	0.0006734	3.5768	193640000	5	O15417;H9KVB4;O15417-2;H7C0N9	O15417;H9KVB4;O15417-2	Trinucleotide repeat-containing gene 18 protein
hCG_1984214;MRPS17	24.2947	25.4101	24.3537	0	13.637	1380700000	7	I3L0E3;Q9Y2R5;E9PE17	I3L0E3;Q9Y2R5;E9PE17	28S ribosomal protein S17, mitochondrial
NSF	26.0159	25.8088	25.3275	0	108.47	9750400000	99	P46459;I3L0N3;P46459-2;I3L0L3;I3L2G1;K7EQD6;I3L338;I3L4Q9	P46459;I3L0N3;P46459-2	Vesicle-fusing ATPase
BCL7C	22.1794	21.5058	17.2701	0	6.3166	69546000	3	Q8WUZ0;I3L1Q2;Q8WUZ0-2	Q8WUZ0;I3L1Q2;Q8WUZ0-2	B-cell CLL/lymphoma 7 protein family member C
ELP5	18.1752	19.2242	18.5187	0.0043935	2.4388	0	1	Q8TE02;I3L1Q3;Q8TE02-4	Q8TE02;I3L1Q3;Q8TE02-4	Elongator complex protein 5
FLYWCH2	22.7879	24.8684	23.9998	0	16.169	579450000	10	Q96CP2;I3L1Y9;I3L4I0;Q4VC44;I3L0R3;I3L231;Q4VC44-2;Q4VC44-3	Q96CP2;I3L1Y9;I3L4I0	FLYWCH family member 2
MPDU1	27.5211	26.6573	25.7116	0	12.134	1711200000	18	O75352;J3QS48;I3L295;J3KTK8;J3QQZ4;J3KT75;J3QW43;J3QRD5;O75352-2;J3KSI4;I3L405;I3L261;I3L1D2;I3L4E0	O75352;J3QS48;I3L295;J3KTK8;J3QQZ4;J3KT75;J3QW43;J3QRD5;O75352-2;J3KSI4;I3L405;I3L261;I3L1D2;I3L4E0	Mannose-P-dolichol utilization defect 1 protein
GEMIN4	22.7617	22.7456	21.3396	0	22.58	1075000000	17	P57678;I3L2C7;I3L399;I3L4A4;E7EN12;I3L4M4;I3L1J7	P57678;I3L2C7;I3L399	Gem-associated protein 4
CIC	21.1464	20.1851	18.6641	0	41.858	552230000	23	I3L2J0;Q96RK0;I3L135;I3L1Q4	I3L2J0;Q96RK0	Protein capicua homolog
CEP131	20.5238	20.8606	19.4859	0	12.985	384490000	10	Q9UPN4;Q9UPN4-2;I3L2J8;Q9UPN4-3;I3L2X7;I3L4M5	Q9UPN4;Q9UPN4-2;I3L2J8;Q9UPN4-3	Centrosomal protein of 131 kDa
PCTP	19.5055	18.7844	20.6309	0.0019468	2.9889	19484000	1	Q9UKL6;I3L4Z8;I3L2M9;I3L3H0;Q9UKL6-2	Q9UKL6;I3L4Z8;I3L2M9;I3L3H0;Q9UKL6-2	Phosphatidylcholine transfer protein
DVL2	18.4726	20.5901	16.578	0	7.3137	62775000	5	O14641;I3L2W9;I3L2N2;I3L0M7;I3L0Z8	O14641;I3L2W9;I3L2N2;I3L0M7	Segment polarity protein dishevelled homolog DVL-2
NDE1	21.1706	21.4877	19.7906	0	17.276	187930000	7	Q9NXR1;Q9NXR1-2;I3L2R9;I3L522;I3L2R3;I3L2T8;I3L533;Q9GZM8;J3QRZ1;A6NIZ0;Q9GZM8-3;Q9GZM8-2;J3QSD2	Q9NXR1;Q9NXR1-2;I3L2R9;I3L522;I3L2R3;I3L2T8;I3L533	Nuclear distribution protein nudE homolog 1
EIF5A;EIF5AL1;EIF5A2	29.7918	30.2252	28.6927	0	97.114	27334000000	64	P63241;I3L397;I3L504;P63241-2;Q6IS14;Q9GZV4;F8WCJ1;C9J7B5;C9J4W5	P63241;I3L397;I3L504;P63241-2;Q6IS14;Q9GZV4;F8WCJ1;C9J7B5;C9J4W5	Eukaryotic translation initiation factor 5A-1;Eukaryotic translation initiation factor 5A;Eukaryotic translation initiation factor 5A-1-like;Eukaryotic translation initiation factor 5A-2
CHMP6	23.4687	23.7501	22.8651	0	9.9813	406290000	4	Q96FZ7;I3L3E4;I3L4G8;I3L4A1	Q96FZ7;I3L3E4;I3L4G8;I3L4A1	Charged multivesicular body protein 6
ATPAF1	23.7029	24.0852	22.4237	0	29.69	680600000	19	Q5TC12;I3L448;Q5TC12-2;Q5TC12-3;H0YEW4;H0YD21;I3L1W9;A8MRA7;H0YCA6	Q5TC12;I3L448;Q5TC12-2;Q5TC12-3;H0YEW4;H0YD21;I3L1W9;A8MRA7	ATP synthase mitochondrial F1 complex assembly factor 1
KANSL1	25.7168	25.326	25.0743	0.00051238	3.8619	9521400000	4	Q7Z3B3;I3L4J3;Q7Z3B3-2	Q7Z3B3;I3L4J3;Q7Z3B3-2	KAT8 regulatory NSL complex subunit 1
ABCC1	21.1636	18.9432	17.1093	0	18.107	254110000	13	P33527;I3L4X2;P33527-8;P33527-6;P33527-7;P33527-5;P33527-4;P33527-2;P33527-3;P33527-9	P33527;I3L4X2;P33527-8;P33527-6;P33527-7;P33527-5;P33527-4;P33527-2;P33527-3;P33527-9	Multidrug resistance-associated protein 1
GPS2	23.646	23.0671	20.6982	0	8.879	454500000	6	Q13227;I3L4X7;I3L3Y9;I3L1H4	Q13227;I3L4X7;I3L3Y9	G protein pathway suppressor 2
CACTIN	22.7079	22.5847	22.2297	0	32.144	740810000	17	Q8WUQ7;J3KMW8;Q8WUQ7-2;K7ENY9;K7EIU6;K7EMQ0	Q8WUQ7;J3KMW8;Q8WUQ7-2	Cactin
SMARCD2	25.4199	24.7994	23.9507	0	83.423	3790100000	43	Q92925;J3KMX2;Q92925-3;Q92925-2;J3QWB6	Q92925;J3KMX2;Q92925-3;Q92925-2;J3QWB6	SWI/SNF-related matrix-associated actin-dependent regulator of chromatin subfamily D member 2
AFP	28.1743	27.8257	26.8985	0	200.93	29237000000	112	P02771;J3KMX3	P02771;J3KMX3	Alpha-fetoprotein
CDCA3	24.1357	24.1075	21.2007	0	46.092	625350000	16	Q99618;J3KMY0;F5GX58;F8WDL1	Q99618;J3KMY0;F5GX58;F8WDL1	Cell division cycle-associated protein 3
INTS2	18.1199	19.9555	16.9403	0	6.917	103850000	3	Q9H0H0;J3KMZ7;J3KRH0	Q9H0H0;J3KMZ7	Integrator complex subunit 2
DPF2	24.3621	24.0794	22.5311	0	25.698	1337700000	22	Q92785;J3KMZ8;Q92785-2;E9PN04	Q92785;J3KMZ8;Q92785-2	Zinc finger protein ubi-d4
LDLR	23.444	22.406	20.9961	0	32.175	1182500000	17	P01130;J3KMZ9;P01130-2;P01130-3;P01130-6;P01130-4;P01130-5;H0YMD1;H0YM92;H0YMQ3	P01130;J3KMZ9;P01130-2;P01130-3;P01130-6;P01130-4;P01130-5;H0YMD1;H0YM92	Low-density lipoprotein receptor
PI4KA	20.8694	20.6476	19.7628	0	30.746	614120000	26	P42356;J3KN10;P42356-2;A4QPH2;Q8N8J0;A4QPH2-2;A4QPH2-3	P42356;J3KN10	Phosphatidylinositol 4-kinase alpha
RCOR1	25.2042	24.8671	23.8676	0	37.432	2565500000	29	Q9UKL0;J3KN32;Q9P2K3-2;E9PQE5;B4DV59;Q8IZ40;E9PR63	Q9UKL0;J3KN32	REST corepressor 1
PTPN3	18.3722	18.6595	18.1878	0.00052047	4.1675	45493000	3	P26045;J3KN34;P26045-3;P26045-2	P26045;J3KN34;P26045-3;P26045-2	Tyrosine-protein phosphatase non-receptor type 3;Tyrosine-protein phosphatase non-receptor type
TPM3	18.4266	21.9676	17.4776	0.00099305	3.2867	69719000	1	J3KN67;P06753;P06753-7;K7EP68;H0YL80;K7EQW8	J3KN67;P06753;P06753-7	Tropomyosin alpha-3 chain
TBC1D8B	19.2375	18.1521	19.0771	0.00018149	5.1489	74587000	5	Q0IIM8;J3KN75;H0Y552;D6RFZ2;Q0IIM8-2;Q0IIM8-3	Q0IIM8;J3KN75;H0Y552	TBC1 domain family member 8B
OXA1L	25.4847	25.6421	24.9965	0	32.768	2601900000	34	Q15070;S4R3Q9;J3KNA0;Q15070-2;E7EVY0;C9JC63;Q15070-3	Q15070;S4R3Q9;J3KNA0;Q15070-2;E7EVY0	Mitochondrial inner membrane protein OXA1L
CCS	26.9303	26.8321	25.9843	0	193.37	5446100000	28	O14618;J3KNF4;E9PP76;E9PK03	O14618;J3KNF4;E9PP76	Copper chaperone for superoxide dismutase;Superoxide dismutase [Cu-Zn]
CYB5B	27.1902	27.0316	25.9733	0	137.12	2465400000	25	J3KNF8;O43169;H3BUX2;D6RFH4;J3QR91	J3KNF8;O43169;H3BUX2;D6RFH4	Cytochrome b5 type B
SENP3	24.0762	22.8696	21.9934	0	26.12	883560000	23	Q9H4L4;J3KNH7;J3QL36;J3QRE4;J3KSF5	Q9H4L4;J3KNH7;J3QL36	Sentrin-specific protease 3
COG4	23.486	23.0786	22.6438	0	51.614	1282400000	26	Q9H9E3;J3KNI1;Q9H9E3-3;Q9H9E3-2;H3BSD2;H3BMV9;E9PRT5;J3KRB5;J3QLW1;H3BQB2	Q9H9E3;J3KNI1;Q9H9E3-3;Q9H9E3-2	Conserved oligomeric Golgi complex subunit 4
NAALAD2	20.7194	21.0865	18.273	0	17.739	245300000	9	Q9Y3Q0;J3KNJ3;E9PJV2;E9PKX5;Q9Y3Q0-2;E9PII2;E9PJ53	Q9Y3Q0;J3KNJ3	N-acetylated-alpha-linked acidic dipeptidase 2
AP4S1	21.2407	21.3479	20.8252	0.0024089	2.8153	59278000	3	Q9Y587;J3KNK4	Q9Y587;J3KNK4	AP-4 complex subunit sigma-1
SEC16A	24.9575	24.7561	23.5322	0	220.48	8400200000	120	J3KNL6;O15027;O15027-2;O15027-4;O15027-3;X6RGP5	J3KNL6;O15027;O15027-2;O15027-4;O15027-3;X6RGP5	Protein transport protein Sec16A
PHKG2	21.0367	23.0027	20.3183	0	14.015	302720000	8	P15735;J3KNN3;P15735-2;H3BP07;H3BTW6;H3BTI9;H3BN16	P15735;J3KNN3;P15735-2;H3BP07;H3BTW6	Phosphorylase b kinase gamma catalytic chain, liver/testis isoform
BRAP	19.4143	18.7309	17.2126	0.0013098	3.1032	37414000	2	Q7Z569;J3KNN7;Q7Z569-2	Q7Z569;J3KNN7;Q7Z569-2	BRCA1-associated protein
PARVA	23.5581	24.2938	20.3438	0	15.826	695050000	11	Q9NVD7;J3KNQ4;E9PS97;Q9NVD7-2	Q9NVD7;J3KNQ4	Alpha-parvin
MARK3	22.5178	22.6116	20.806	0	22.182	740700000	21	P27448;P27448-3;J3KNR0;P27448-4;P27448-2;P27448-6;P27448-7;P27448-8;H0YIY6;H0YKP9;A2SY06;Q9P0L2;Q9P0L2-3;H0YKJ3;H0YNV4;Q9P0L2-2;Q96L34;Q96L34-2;K7EK17;K7EKG8	P27448;P27448-3;J3KNR0;P27448-4;P27448-2;P27448-6;P27448-7;P27448-8;H0YIY6	MAP/microtubule affinity-regulating kinase 3
ZNF292	18.3134	18.4469	18.4998	0.0013093	3.1016	0	2	O60281;J3KNV1;O60281-2	O60281;J3KNV1;O60281-2	Zinc finger protein 292
SRSF2	29.7526	29.7003	27.9928	0	59.3	24050000000	76	Q01130;J3KP15;J3QL05;Q01130-2;Q9BRL6;Q9BRL6-2	Q01130;J3KP15;J3QL05;Q01130-2	Serine/arginine-rich splicing factor 2
FAM21C;FAM21A;FAM21B	22.2153	22.9352	21.4615	0	107.17	1351800000	31	Q9Y4E1;J3KP36;Q9Y4E1-5;Q9Y4E1-3;Q9Y4E1-6;Q9Y4E1-2;Q9Y4E1-4;Q641Q2;F8W7U3;E7ESD2;Q5SNT6;Q641Q2-2;F5GY39;B1AP61;Q5SRD0	Q9Y4E1;J3KP36;Q9Y4E1-5;Q9Y4E1-3;Q9Y4E1-6;Q9Y4E1-2;Q9Y4E1-4;Q641Q2;F8W7U3;E7ESD2;Q5SNT6;Q641Q2-2	WASH complex subunit FAM21C;WASH complex subunit FAM21A;WASH complex subunit FAM21B
PHACTR2	17.7111	18.4488	18.7648	0.0097487	1.9905	18474000	1	O75167;O75167-2;J3KP75;O75167-5;O75167-4	O75167;O75167-2;J3KP75;O75167-5;O75167-4	Phosphatase and actin regulator 2;Phosphatase and actin regulator
RBM7	24.5388	24.4194	23.0515	0	23.553	985530000	15	Q9Y580;J3KPD3;F5GXV8;F5GY08;I3L521;F5H606;G3V1T9;F5H674	Q9Y580;J3KPD3;F5GXV8;F5GY08;I3L521;F5H606	RNA-binding protein 7
MRPL42	25.0956	23.889	24.2549	0.00035026	4.3532	570730000	6	Q9Y6G3;S4R360;J3KPP0;S4R2Z7	Q9Y6G3;S4R360;J3KPP0;S4R2Z7	39S ribosomal protein L42, mitochondrial
LUC7L3	26.4978	26.2921	25.5927	0	105.62	5585300000	53	O95232;J3KPP4;D6RDI2;D6RHH0;U3KQT3;C9JL41;O95232-2;E7EN55;H7C5U7;H0YA81	O95232;J3KPP4;D6RDI2	Luc7-like protein 3
DNAJB12	20.8846	21.331	21.006	0	6.8695	250860000	7	Q9NXW2;V9GYN7;J3KPS0;Q9NXW2-2	Q9NXW2;V9GYN7;J3KPS0;Q9NXW2-2	DnaJ homolog subfamily B member 12
TRABD	25.1665	24.0627	22.6223	0	30.685	1355900000	23	Q9H4I3;J3KPT4;Q9H4I3-2	Q9H4I3;J3KPT4;Q9H4I3-2	TraB domain-containing protein
PHB2	29.6579	29.4487	28.708	0	180.94	51289000000	97	Q99623;J3KPX7;F5GY37;F5GWA7;Q99623-2;F5H3X6;F5H2D2;F5H0C5;U3KPZ5	Q99623;J3KPX7;F5GY37;F5GWA7;Q99623-2;F5H3X6	Prohibitin-2
OLA1	27.7257	27.954	27.1426	0	91.741	20900000000	71	Q9NTK5;J3KQ32;Q9NTK5-2;Q9NTK5-3;C9JTK6;C9JCJ9	Q9NTK5;J3KQ32;Q9NTK5-2;Q9NTK5-3	Obg-like ATPase 1
TGOLN2	22.5054	22.2765	21.6451	0	22.151	468910000	10	O43493;O43493-2;J3KQ45;O43493-5;O43493-3;O43493-4;F8W8W7;O43493-6	O43493;O43493-2;J3KQ45;O43493-5;O43493-3;O43493-4;F8W8W7;O43493-6	Trans-Golgi network integral membrane protein 2
PTRH2	26.0485	25.4793	24.9274	0	130.68	1488100000	24	Q9Y3E5;J3KQ48	Q9Y3E5;J3KQ48	Peptidyl-tRNA hydrolase 2, mitochondrial
RELN	19.4787	18.9101	16.5706	0	16.482	228570000	7	P78509;J3KQ66;P78509-3;P78509-2	P78509;J3KQ66;P78509-3;P78509-2	Reelin
SUMF2	26.7407	26.2095	25.5004	0	64.773	4193600000	35	Q8NBJ7;J3KQJ1;C9J660;C9JL30;H7C3B2;A8MXB9;F8WA42;Q8NBJ7-3;E9PBT8;E9PG02;J3QT17;Q8NBJ7-2;Q8NBJ7-5;F8WEX5;F8WES7;Q8NBJ7-4	Q8NBJ7;J3KQJ1;C9J660;C9JL30;H7C3B2;A8MXB9;F8WA42;Q8NBJ7-3;E9PBT8;E9PG02;J3QT17;Q8NBJ7-2;Q8NBJ7-5;F8WEX5	Sulfatase-modifying factor 2
RPL36A;RPL36A-HNRNPH2	27.6399	27.547	26.4019	0	17.213	4753800000	21	J3KQN4;P83881;H7BZ11;H0Y5B4;R4GN19;H7BY91;H0Y3V9	J3KQN4;P83881;H7BZ11;H0Y5B4	60S ribosomal protein L36a
BABAM1	23.8526	22.7477	22.1671	0	33.581	673120000	10	Q9NWV8;M0R0I0;J3KQS6;M0R3F4;M0R2A4;M0R2K3;M0R193;M0QX07;Q9NWV8-3;M0QY17;M0R2I2;M0QYV1;M0QXG9;Q9NWV8-2;M0R3H9	Q9NWV8;M0R0I0;J3KQS6;M0R3F4;M0R2A4;M0R2K3;M0R193;M0QX07;Q9NWV8-3;M0QY17;M0R2I2	BRISC and BRCA1-A complex member 1
CCDC12	25.1234	25.3103	24.3068	0	34.912	1207200000	17	Q8WUD4;J3KR35;S4R331;C9JUN5	Q8WUD4;J3KR35;S4R331;C9JUN5	Coiled-coil domain-containing protein 12
TAF6	23.7375	22.9799	22.0197	0	146.57	1489000000	38	P49848;P49848-3;J3KR72;P49848-2;C9JFL8;C9JTY6;C9JIS2;E5RHA1;C9J088;E5RKA5;F8WEJ7;C9J7C4;C9JHQ8	P49848;P49848-3;J3KR72;P49848-2	Transcription initiation factor TFIID subunit 6
TBCD	18.4343	19.759	20.9992	0	17.825	277410000	13	Q9BTW9;J3KR97;Q9BTW9-4;Q9BTW9-5;I3L439;I3L4D2;I3L3H4;I3L131;I3L143;I3L0V3;I3L163;I3L500;Q9BTW9-3;I3L1S3	Q9BTW9;J3KR97;Q9BTW9-4;Q9BTW9-5;I3L439	Tubulin-specific chaperone D
SMG1	19.5034	19.0531	15.327	0	9.1979	269310000	8	Q96Q15;J3KRA9;Q96Q15-2;Q96Q15-4;Q96Q15-3;I3L400;I3L0W2;H3BQN7	Q96Q15;J3KRA9;Q96Q15-2;Q96Q15-4;Q96Q15-3	Serine/threonine-protein kinase SMG1
NT5C	22.3981	23.2378	22.1563	0	6.1459	213840000	3	Q8TCD5;J3KSX6;J3KRC4;Q8TCD5-2	Q8TCD5;J3KSX6;J3KRC4;Q8TCD5-2	5(3)-deoxyribonucleotidase, cytosolic type
LIMD2	22.3427	22.9346	22.0892	0	89.664	247220000	7	Q9BT23;J3KRR0;J3QQM5;J3QL69	Q9BT23;J3KRR0;J3QQM5;J3QL69	LIM domain-containing protein 2
SLC39A11	23.34	22.7719	21.3824	0.0034904	2.6208	247360000	4	Q8N1S5;Q8N1S5-2;J3QQP1;J3KS66;J3QLB2;J3KRX2;J3QS49	Q8N1S5;Q8N1S5-2;J3QQP1;J3KS66;J3QLB2;J3KRX2;J3QS49	Zinc transporter ZIP11
RPL17	30.5344	30.0762	29.2555	0	69.083	38705000000	94	P18621;J3QQT2;J3KRX5;P18621-3;J3QLC8;P18621-2;J3QS96;J3KRB3;J3KSJ0	P18621;J3QQT2;J3KRX5;P18621-3;J3QLC8;P18621-2;J3QS96;J3KRB3	60S ribosomal protein L17
ICT1	24.5446	23.8643	23.5392	0	7.7443	666360000	8	Q14197;J3KS15;J3QRF8	Q14197;J3KS15	Peptidyl-tRNA hydrolase ICT1, mitochondrial
DCXR	26.2727	24.8567	25.3972	0	28.254	2881000000	29	Q7Z4W1;J3KS22;J3QS36;J3KRZ4;J3QS45;J3KSZ5;J3QL34	Q7Z4W1;J3KS22;J3QS36;J3KRZ4;J3QS45;J3KSZ5;J3QL34	L-xylulose reductase
TMEM199	19.1416	22.6453	21.9692	0.0078449	2.128	176680000	1	Q8N511;J3KS81;J3KRW7	Q8N511;J3KS81;J3KRW7	Transmembrane protein 199
C17orf62	22.7689	23.198	23.077	0.00017912	4.8709	254410000	3	Q9BQA9;J3QRG5;J3KSJ5;Q9BQA9-2;J3KTF4;J3QRZ2;J3QLB7;J3QKS6;J3QKZ6;J3QQQ4;H0Y2X1;J3KTI1;J3KSB6;J3KS78;J3QS53	Q9BQA9;J3QRG5;J3KSJ5;Q9BQA9-2;J3KTF4;J3QRZ2;J3QLB7;J3QKS6	Uncharacterized protein C17orf62
TRAPPC8	17.5077	17.5296	17.5797	0.00018103	5.1023	38351000	4	Q9Y2L5;J3QSA1;J3KSL8;Q9Y2L5-2;J3QQJ5	Q9Y2L5;J3QSA1;J3KSL8;Q9Y2L5-2;J3QQJ5	Trafficking protein particle complex subunit 8
MSL1	20.5745	19.1541	18.1155	0.003486	2.6091	48319000	3	Q68DK7;J3QQY0;J3KSZ8	Q68DK7;J3QQY0;J3KSZ8	Male-specific lethal 1 homolog
DDX5	29.8917	29.3104	28.2884	0	321.86	79998000000	208	P17844;J3KTA4;P17844-2;J3QRQ7;J3KRZ1;J3QSF1;J3KRX8;J3QR02;X6RLV5;J3QRN5;J3QKN9;J3QLG9;J3QR62	P17844;J3KTA4;P17844-2	Probable ATP-dependent RNA helicase DDX5
RTTN	24.5669	24.3171	24.1124	0.007134	2.2314	8807800000	14	Q86VV8;J3KTD2;Q86VV8-2;Q86VV8-4;Q86VV8-3;J3KT00	Q86VV8;J3KTD2;Q86VV8-2;Q86VV8-4;Q86VV8-3;J3KT00	Rotatin
ABHD3	22.2414	21.7582	21.9462	0	10.13	259730000	6	Q8WU67;J3KTE1;J3QQR0;J3KSP1	Q8WU67;J3KTE1	Phospholipase ABHD3
RPL19	31.4075	31.6201	30.607	0	41.961	63169000000	70	P84098;J3QR09;J3KTE4;J3QL15	P84098;J3QR09;J3KTE4	60S ribosomal protein L19;Ribosomal protein L19
SRSF1	29.948	29.4173	28.0394	0	97.651	33495000000	123	Q07955;J3KTL2;Q07955-3;Q07955-2;J3KSR8;J3QQV5;J3KSW7	Q07955;J3KTL2;Q07955-3;Q07955-2;J3KSR8	Serine/arginine-rich splicing factor 1
CHERP	25.6682	25.4053	24.0288	0	130.78	5175300000	56	Q8IWX8;J3QK89	Q8IWX8;J3QK89	Calcium homeostasis endoplasmic reticulum protein
RAD51C	23.3531	20.7765	17.6842	0	8.5287	200180000	5	O43502;J3QKK3;J3QLB5;E9PI66;Q7KZJ0;O43502-2;H7C1R0	O43502;J3QKK3;J3QLB5;E9PI66;Q7KZJ0;O43502-2	DNA repair protein RAD51 homolog 3
CDK11B;CDC2L1;CDK11A	24.9633	24.6515	24.4637	0	38.916	4083300000	48	P21127-2;J3QR29;J3QKR5;J3QR44;P21127-8;P21127-3;P21127;P21127-9;J3KTL7;P21127-6;P21127-10;P21127-12;P21127-4;P21127-5;Q9UQ88-9;J3KS35;Q13882;Q5QPQ9;E9PFJ2;E7ESP2	P21127-2;J3QR29;J3QKR5;J3QR44;P21127-8;P21127-3;P21127;P21127-9;J3KTL7;P21127-6;P21127-10;P21127-12;P21127-4;P21127-5;Q9UQ88-9	Cyclin-dependent kinase 11B;Cyclin-dependent kinase 11A
BRIP1	17.2947	17.1408	17.4963	0.00083626	3.4906	23507000	1	Q9BX63;J3QKX0;J3QSE8;Q9BX63-2	Q9BX63;J3QKX0;J3QSE8;Q9BX63-2	Fanconi anemia group J protein
SCRN2	20.2507	20.5866	20.4929	0.00099206	3.2813	88954000	1	Q96FV2;J3QQM9;J3QRJ1;J3QL71;Q96FV2-2	Q96FV2;J3QQM9;J3QRJ1;J3QL71;Q96FV2-2	Secernin-2
SNRPB;SNRPN	27.6873	27.339	27.1235	0	16.217	10297000000	48	P14678;P63162;P14678-2;P14678-3;J3QLE5;P63162-2;J3KRY3;S4R3P3	P14678;P63162;P14678-2;P14678-3;J3QLE5;P63162-2;J3KRY3;S4R3P3	Small nuclear ribonucleoprotein-associated proteins B and B;Small nuclear ribonucleoprotein-associated protein N
CD7	23.978	23.9309	22.1991	0	8.8554	289220000	6	P09564;J3QLM0	P09564;J3QLM0	T-cell antigen CD7
CDC6	19.3915	18.9582	18.8519	0.0024042	2.7786	66578000	1	Q99741;J3QLN7	Q99741;J3QLN7	Cell division control protein 6 homolog
MRPS7	26.9819	26.4234	25.752	0	76.702	4782000000	45	Q9Y2R9;J3QLS3;J3QQS1;J3QKW2;J3KSI8	Q9Y2R9;J3QLS3;J3QQS1;J3QKW2;J3KSI8	28S ribosomal protein S7, mitochondrial
RPL18	31.7037	31.2464	30.7462	0	96.275	71679000000	83	Q07020;J3QQ67;G3V203;H0YHA7;Q07020-2;F8VYV2;A0A075B7A0;F8VUA6;F8VXR6	Q07020;J3QQ67;G3V203;H0YHA7;Q07020-2;F8VYV2;A0A075B7A0;F8VUA6	60S ribosomal protein L18
SAP30BP	22.8535	22.9105	22.3192	0	11.374	389180000	9	Q9UHR5;J3QQJ0;Q9UHR5-2;F5H478;J3KRU5;X6R3T8;J3QLH3;J3KS14;J3QLM2;J3KRR6	Q9UHR5;J3QQJ0;Q9UHR5-2;F5H478;J3KRU5;X6R3T8;J3QLH3;J3KS14	SAP30-binding protein
IMPACT	19.9915	19.5719	19.3934	0.0019465	2.9876	13249000	1	Q9P2X3;J3QQU0;Q9P2X3-2	Q9P2X3;J3QQU0;Q9P2X3-2	Protein IMPACT
SUZ12	22.498	22.5377	22.1613	0	43.09	816280000	22	Q15022;J3QQW9	Q15022;J3QQW9	Polycomb protein SUZ12
FDXR	21.263	20.9899	17.8698	0	8.9421	209480000	6	P22570;J3QQX3;P22570-4;P22570-6;P22570-5;P22570-7;P22570-3;P22570-2;J3QKZ8	P22570;J3QQX3;P22570-4;P22570-6;P22570-5;P22570-7;P22570-3;P22570-2	NADPH:adrenodoxin oxidoreductase, mitochondrial
YTHDC1	25.5488	25.1269	23.897	0	26.344	2966700000	35	J3QR07;Q96MU7;Q96MU7-2;J3KS01;J3KRG5	J3QR07;Q96MU7;Q96MU7-2	YTH domain-containing protein 1
TIMM21	21.3376	21.4534	19.9375	0.00051256	3.8646	104410000	3	Q9BVV7;J3QRI1	Q9BVV7;J3QRI1	Mitochondrial import inner membrane translocase subunit Tim21
MYL12A	30.1582	30.2638	28.789	0	227.53	35361000000	94	P19105;J3QRS3;P24844;J3KTJ1;P24844-2	P19105;J3QRS3	Myosin regulatory light chain 12A
YES1	25.8176	25.0067	24.1717	0	64.975	3434200000	37	P07947;J3QRU1;P06241-2;P06241-3;E5RFS5	P07947;J3QRU1	Tyrosine-protein kinase Yes;Non-specific protein-tyrosine kinase
GIT1	21.3111	21.65	21.3339	0	10.339	391010000	5	Q9Y2X7;Q9Y2X7-3;J3QRU8;J3QLH1;J3QL89	Q9Y2X7;Q9Y2X7-3;J3QRU8	ARF GTPase-activating protein GIT1
HELZ	20.2787	20.4119	17.4674	0	10.638	264890000	9	P42694;J3QS41;P42694-2;A0A075B6R3;J3QRR8	P42694;J3QS41;P42694-2;A0A075B6R3	Probable helicase with zinc finger domain
VEZF1	22.2133	19.8883	18.7015	0	6.7822	179350000	5	Q14119;J3QSH4;J9JIC7	Q14119;J3QSH4	Vascular endothelial zinc finger 1
PTK2	22.2567	22.7882	21.7902	0	29.753	1195700000	25	Q05397;Q05397-5;J3QT16;H0YBP1;E7ESA6;Q05397-2;H0YB16;H0YBZ1;E9PEI4;B4DWJ1;Q05397-6;E5RHD8;E5RIK4;E5RG54;E5RH48;E5RH01;E5RG66;E5RI72;E5RI03;E5RFW9;E5RJP0;E5RGA6;H0YB99;Q05397-4;Q05397-3;E5RH08;H0YAS0;H0YB33	Q05397;Q05397-5;J3QT16;H0YBP1;E7ESA6;Q05397-2;H0YB16;H0YBZ1;E9PEI4;B4DWJ1;Q05397-6	Focal adhesion kinase 1
PON2	28.9978	28.5523	27.5174	0	323.31	23576000000	77	J3QT77;Q15165;Q15165-3;Q15165-1;G3XAK4	J3QT77;Q15165;Q15165-3;Q15165-1;G3XAK4	Serum paraoxonase/arylesterase 2
CRBN	22.8897	22.5481	20.7018	0	14.908	427500000	10	Q96SW2;Q96SW2-2;J3QT87;J3QT51	Q96SW2;Q96SW2-2;J3QT87	Protein cereblon
CHCHD6	23.3697	23.5916	20.2689	0	7.5851	410350000	2	Q9BRQ6;J3QTA6;J3QTB2;H0Y922	Q9BRQ6;J3QTA6;J3QTB2;H0Y922	MICOS complex subunit MIC25
FSIP2	16.9484	16.5059	16.2271	0.0081189	2.0754	217530000	5	Q5CZC0;J3QTJ6	Q5CZC0;J3QTJ6	Fibrous sheath-interacting protein 2
C17orf75	20.1169	20.0987	17.851	0.0033381	2.6547	75702000	2	Q9HAS0;J9JIC5;K7ERX0;K7EIQ2;K7EII1;J3KRR1	Q9HAS0;J9JIC5;K7ERX0;K7EIQ2;K7EII1;J3KRR1	Protein Njmu-R1
LMNB2	28.1609	27.2542	26.7477	0	142.88	26158000000	129	Q03252;J9JID7	Q03252;J9JID7	Lamin-B2
TMCO1	29.1406	28.5111	28.1097	0	78.563	10012000000	20	Q9UM00;J9JIE6;Q9UM00-2;J3QQY2;J3KS45;J3KTQ7	Q9UM00;J9JIE6;Q9UM00-2;J3QQY2;J3KS45	Transmembrane and coiled-coil domain-containing protein 1
TMEM8A	20.3066	19.0343	17.7929	0.00051662	4.0379	0	1	Q9HCN3;K4DI83	Q9HCN3;K4DI83	Transmembrane protein 8A
MBD3	26.5982	25.8587	25.3824	0	180.31	3970700000	34	O95983;O95983-2;K7EIE8	O95983;O95983-2;K7EIE8	Methyl-CpG-binding domain protein 3
CLUH	25.0844	25.5297	24.6992	0	323.31	9353900000	116	K7EIG1;I3L2B0;I3L4B5;I3L318;Q9Y5I4;Q9Y5I4-2	K7EIG1;I3L2B0
KATNAL2	26.7908	26.1102	24.9267	0.0057525	2.268	8547400000	2	Q8IYT4;K7EM02;K7EIJ8;Q8IYT4-2	Q8IYT4;K7EM02;K7EIJ8;Q8IYT4-2	Katanin p60 ATPase-containing subunit A-like 2
NUDT16L1	23.9841	23.9452	23.8806	0	16.081	763870000	13	Q9BRJ7;K7EIN2;K7ENA3;W4VSQ8;Q9BRJ7-2	Q9BRJ7;K7EIN2;K7ENA3	Protein syndesmos
YIPF2	25.594	25.2238	24.4264	0	44.494	924800000	8	Q9BWQ6;K7EIP7;K7ERW0;K7ENM8	Q9BWQ6;K7EIP7;K7ERW0;K7ENM8	Protein YIPF2;Protein YIPF
SMAD4	22.7294	23.9709	21.8103	0	18.172	872020000	11	Q13485;K7EIU8;K7ES96;K7EL15;K7EL18;K7EIJ2;K7ENG8;K7ENG1;K7ELK2	Q13485;K7EIU8;K7ES96	Mothers against decapentaplegic homolog 4;Mothers against decapentaplegic homolog
FAM32A	24.3325	23.9678	23.3752	0	6.3786	387800000	7	Q9Y421;K7EIY1;Q9Y421-3;K7ELZ8;K7ENN5;Q9Y421-2	Q9Y421;K7EIY1;Q9Y421-3;K7ELZ8;K7ENN5;Q9Y421-2	Protein FAM32A
STX10	22.8988	17.4953	20.997	0.00099239	3.2828	109050000	1	O60499;K7EJ05;K7EQ84;K7EPP9;K7ELY2;X6R2W0;K7EIY4;Q5U8S2;O60499-2	O60499;K7EJ05;K7EQ84;K7EPP9;K7ELY2;X6R2W0;K7EIY4;Q5U8S2;O60499-2	Syntaxin-10
GPX4	19.2615	20.643	20.3841	0.00017899	4.8486	56916000	3	P36969;K7ERP4;K7EJ20;P36969-2;R4GNE4;K7ENB4;K7EKX7	P36969;K7ERP4;K7EJ20;P36969-2;R4GNE4;K7ENB4;K7EKX7	Phospholipid hydroperoxide glutathione peroxidase, mitochondrial;Glutathione peroxidase
ACTN4	21.0448	20.9172	17.9075	0.0031812	2.6622	45579000	2	K7EJH8	K7EJH8
FAM210A	24.3199	23.9859	22.6167	0	13.358	788300000	12	Q96ND0;K7EK00;K7EPG9;K7ERQ2	Q96ND0;K7EK00	Protein FAM210A
H3F3A;H3F3B	27.5118	27.1087	26.5599	0	134.94	1889900000	11	P84243;K7EK07	P84243;K7EK07	Histone H3.3;Histone H3
NDUFA11	23.0155	22.946	21.9357	0.0005109	3.7843	339740000	5	Q86Y39-2;Q86Y39;K7EQ77;K7EK78;K7EP35;K7EMT4	Q86Y39-2;Q86Y39;K7EQ77;K7EK78;K7EP35;K7EMT4	NADH dehydrogenase [ubiquinone] 1 alpha subcomplex subunit 11
LONP1	28.1157	27.6319	26.279	0	323.31	25992000000	144	K7EKE6;P36776;K7EJE8;P36776-2;P36776-3;K7ER27;K7ERR6;K7EQF8;K7ER56	K7EKE6;P36776;K7EJE8;P36776-2;P36776-3	Lon protease homolog, mitochondrial
PPL	20.0296	20.5704	17.633	0	62.524	695780000	25	O60437;K7EKI8;K7EQ71	O60437;K7EKI8;K7EQ71	Periplakin
GRN	20.8427	19.4112	18.9389	0.00018119	5.1128	100930000	5	P28799;K7EKL3;P28799-3;K7EQ05;P28799-2;K7EQI0	P28799;K7EKL3;P28799-3;K7EQ05;P28799-2	Granulins;Acrogranin;Paragranulin;Granulin-1;Granulin-2;Granulin-3;Granulin-4;Granulin-5;Granulin-6;Granulin-7
VPS25	22.6396	24.6033	23.4207	0	34.097	432500000	10	Q9BRG1;K7EKV4;K7ENE3;K7EP45	Q9BRG1;K7EKV4	Vacuolar protein-sorting-associated protein 25
USP32	21.8227	17.3063	19.4816	0.0040868	2.4607	305840000	2	Q8NFA0;K7EKZ1;K7EII4;K7EQL6;Q8NFA0-2	Q8NFA0;K7EKZ1;K7EII4;K7EQL6;Q8NFA0-2	Ubiquitin carboxyl-terminal hydrolase 32;Ubiquitin carboxyl-terminal hydrolase
PPP1R12C	20.9499	21.1573	18.1413	0	14.778	259160000	9	Q9BZL4;Q9BZL4-3;K7EL81;Q9BZL4-4;B4DME2;Q9BZL4-2;K7ER83	Q9BZL4;Q9BZL4-3;K7EL81;Q9BZL4-4;B4DME2;Q9BZL4-2	Protein phosphatase 1 regulatory subunit 12C
RPS15	31.1119	30.9512	30.305	0	140.54	51691000000	79	P62841;K7ELC2;K7EM56;K7EQJ5;K7EJ78;S4R456	P62841;K7ELC2;K7EM56;K7EQJ5;K7EJ78;S4R456	40S ribosomal protein S15
SYNGR2	24.4492	23.8568	23.7964	0	5.388	436700000	5	O43760;K7ELD9;K7ENG9;O43760-2;K7ELS8	O43760;K7ELD9;K7ENG9;O43760-2;K7ELS8	Synaptogyrin-2
DCAF15	17.9312	20.1561	19.1931	0.00083375	3.4311	32715000	1	Q66K64;K7ELE9;K7ERN0	Q66K64;K7ELE9;K7ERN0	DDB1- and CUL4-associated factor 15
DPY19L3	18.9563	19.374	16.7179	0.00034849	4.2545	0	1	Q6ZPD9;Q8N6Q4;K7ELG1;K7ELH8;Q6ZPD9-2	Q6ZPD9;Q8N6Q4;K7ELG1;K7ELH8;Q6ZPD9-2	Probable C-mannosyltransferase DPY19L3
PRKCSH	30.8998	30.1971	29.3882	0	323.31	101000000000	174	K7ELL7;P14314;K7EPW7;K7EKX1;K7EJ70;K7EIP3;K7EL27	K7ELL7;P14314	Glucosidase 2 subunit beta
TMEM205	27.1546	26.4961	25.6971	0	17.419	1923600000	16	Q6UW68;K7ELQ9;K7EM09;K7EPR0;K7ER05;K7EJQ9;K7EMV9	Q6UW68;K7ELQ9;K7EM09;K7EPR0	Transmembrane protein 205
EIF1	27.1404	27.7335	26.9528	0	68.261	2807000000	16	P41567;K7EM18;K7EQP2	P41567;K7EM18	Eukaryotic translation initiation factor 1
ACTG1	20.9027	19.2555	18.6989	0	6.1824	19604000	2	K7EM38;J3KT65;F8WCH0	K7EM38;J3KT65
PIGN	20.8145	19.917	17.8956	0.00018093	5.0929	108970000	3	O95427;K7EM62;K7EPJ2	O95427;K7EM62;K7EPJ2	GPI ethanolamine phosphate transferase 1
HMHA1	18.4719	18.4995	16.948	0	14.178	15270000	1	Q92619;K7EQA4;K7ES98;K7EM85;Q92619-2	Q92619;K7EQA4;K7ES98;K7EM85;Q92619-2	Minor histocompatibility protein HA-1;Minor histocompatibility antigen HA-1
MBD1	22.7703	21.4668	17.7364	0	13.702	241250000	2	Q9UIS9;Q9UIS9-4;Q9UIS9-11;Q9UIS9-5;Q9UIS9-10;K7EN65;K7EPZ6;Q9UIS9-8;Q9UIS9-7;Q9UIS9-2;Q9UIS9-9;Q9UIS9-12;K7EMA9;Q9UIS9-6	Q9UIS9;Q9UIS9-4;Q9UIS9-11;Q9UIS9-5;Q9UIS9-10;K7EN65;K7EPZ6;Q9UIS9-8;Q9UIS9-7;Q9UIS9-2;Q9UIS9-9;Q9UIS9-12;K7EMA9;Q9UIS9-6	Methyl-CpG-binding domain protein 1
DNASE2	22.9955	21.9205	21.5708	0.00035112	4.4006	264370000	2	O00115;K7ENE5	O00115;K7ENE5	Deoxyribonuclease-2-alpha
TMEM256	27.6196	27.3092	25.8275	0	26.832	1476300000	11	Q8N2U0;K7ENI6;K7ERE1	Q8N2U0;K7ENI6;K7ERE1	Transmembrane protein 256
C18orf8	21.6065	20.3724	18.455	0	8.6958	160060000	5	Q96DM3;K7ENL9;K7EIS6	Q96DM3;K7ENL9;K7EIS6	Uncharacterized protein C18orf8
TRMT11	20.0469	17.7488	16.7202	0.0003491	4.2754	19498000	2	Q7Z4G4;Q5JY01;Q5JY02;K7ENP1;Q7Z4G4-3;Q7Z4G4-2	Q7Z4G4;Q5JY01;Q5JY02;K7ENP1;Q7Z4G4-3;Q7Z4G4-2	tRNA (guanine(10)-N2)-methyltransferase homolog
FHOD3	21.4202	20.6378	19.8988	0.0078389	2.1182	579020000	4	Q2V2M9;K7EP24;K7ER94;Q2V2M9-2;Q2V2M9-3;Q2V2M9-4;K7EKZ0	Q2V2M9;K7EP24;K7ER94;Q2V2M9-2;Q2V2M9-3;Q2V2M9-4;K7EKZ0	FH1/FH2 domain-containing protein 3
UBXN6	19.793	19.7067	20.5752	0.00017944	4.9235	114940000	3	Q9BZV1;K7EP32;Q9BZV1-2;K7ELN1	Q9BZV1;K7EP32;Q9BZV1-2;K7ELN1	UBX domain-containing protein 6
RBM42	25.3185	25.3431	24.6295	0	52.211	2840400000	42	Q9BTD8;K7EP90;Q9BTD8-4;Q9BTD8-2;Q9BTD8-3;K7ER08;K7EQ03;K7EML2	Q9BTD8;K7EP90;Q9BTD8-4;Q9BTD8-2;Q9BTD8-3;K7ER08;K7EQ03	RNA-binding protein 42
TMEM161A	24.534	23.1741	22.5251	0	5.8949	1130000000	6	Q9NX61;K7EPA3;Q9NX61-2;K7EQE7;K7EQ34;U3KQT6	Q9NX61;K7EPA3;Q9NX61-2;K7EQE7;K7EQ34;U3KQT6	Transmembrane protein 161A
NAGPA	20.863	18.6624	21.3914	0.0034865	2.6125	125760000	2	Q9UK23;K7EPH3;Q9UK23-3;Q9UK23-2;K7EJ25;K7EL75;K7ERI4	Q9UK23;K7EPH3;Q9UK23-3;Q9UK23-2;K7EJ25;K7EL75;K7ERI4	N-acetylglucosamine-1-phosphodiester alpha-N-acetylglucosaminidase
MGRN1	22.4451	22.7708	21.4795	0	35.65	624230000	15	O60291;O60291-2;K7EPJ5;O60291-3;E9PB19;O60291-4;B4DR12;K7EIM7;K7ERA1;K7EJN3	O60291;O60291-2;K7EPJ5;O60291-3;E9PB19;O60291-4;B4DR12;K7EIM7	E3 ubiquitin-protein ligase MGRN1
ABHD17A	23.3867	22.6281	22.1139	0.0013078	3.0899	474680000	4	Q96GS6;K7EQ25;Q96GS6-4;Q96GS6-3;Q96GS6-2	Q96GS6;K7EQ25;Q96GS6-4;Q96GS6-3;Q96GS6-2	Alpha/beta hydrolase domain-containing protein 17A
KDSR	21.1217	19.3878	19.9628	0.00099552	3.3516	60024000	1	Q06136;K7EQS7;K7ERC8	Q06136;K7EQS7;K7ERC8	3-ketodihydrosphingosine reductase
HDHD2	24.071	24.1586	22.4384	0	17.15	613720000	10	Q9H0R4;K7ER15;K7EMY7;Q9H0R4-2;K7EQD2;K7EKX8;K7EJQ8;K7ENF3	Q9H0R4;K7ER15;K7EMY7;Q9H0R4-2;K7EQD2	Haloacid dehalogenase-like hydrolase domain-containing protein 2
APOC1	25.186	23.5012	16.9702	0.00050916	3.7244	150140000	2	K7ERI9;P02654;K7EKP1;K7EJI9;K7ELM9;K7EPF9	K7ERI9;P02654;K7EKP1;K7EJI9;K7ELM9;K7EPF9	Apolipoprotein C-I;Truncated apolipoprotein C-I
NSRP1	20.7881	21.22	20.5023	0.00017947	4.9289	152560000	4	Q9H0G5;K7ERM9;K7EK40;K7EMD8	Q9H0G5;K7ERM9;K7EK40;K7EMD8	Nuclear speckle splicing regulatory protein 1
KAT2B;KAT2A	19.2353	19.0046	18.1739	0.0024065	2.805	11533000	1	Q92831;Q92830;K7ERS6	Q92831;Q92830;K7ERS6	Histone acetyltransferase KAT2B;Histone acetyltransferase KAT2A
MRPL4	26.453	25.4653	24.7762	0	148.77	3261700000	44	Q9BYD3;K7ES61;K7ELQ0;X6RAY8;Q9BYD3-2;K7EKI4;K7ELF1;K7EJ73	Q9BYD3;K7ES61;K7ELQ0;X6RAY8;Q9BYD3-2;K7EKI4;K7ELF1	39S ribosomal protein L4, mitochondrial
DCAKD	22.0468	19.1478	17.6406	0.0075699	2.1711	56323000	1	Q8WVC6;K7ESP4;Q8WVC6-2	Q8WVC6;K7ESP4;Q8WVC6-2	Dephospho-CoA kinase domain-containing protein
ASNSD1	23.0775	23.6978	22.2398	0.00051493	3.9633	111700000	2	U3KQP6;U3KQ49;L0R819;U3KQP1	U3KQP6;U3KQ49;L0R819;U3KQP1
SARS2	26.7839	26.2223	28.1526	0	111.14	17590000000	77	Q9NP81;M0QWZ7;M0R2C6;Q9NP81-2;M0R259;M0QX29;B4DJM9;M0R2H5;M0R1C0	Q9NP81;M0QWZ7;M0R2C6;Q9NP81-2;M0R259	Serine--tRNA ligase, mitochondrial
WIZ	24.6342	23.8411	22.8106	0	53.766	3427800000	47	M0QXA7;O95785-3;B3KVH1;O95785;O95785-2	M0QXA7;O95785-3;B3KVH1;O95785;O95785-2	Protein Wiz
MCOLN1	18.0426	19.103	17.8489	0.0013095	3.1019	41746000	2	Q9GZU1;M0QXD0	Q9GZU1;M0QXD0	Mucolipin-1
TXN2	24.8412	24.0971	23.4878	0	9.6401	531000000	5	Q99757;M0QXH0	Q99757;M0QXH0	Thioredoxin, mitochondrial
ZNF428	22.4875	22.0731	17.8745	0	6.9352	41171000	3	Q96B54;M0QXZ5	Q96B54;M0QXZ5	Zinc finger protein 428
PTOV1	20.4216	19.8926	21.0368	0.00067283	3.5686	127500000	0	Q86YD1;M0QY25;M0QYQ4;M0QYH7;Q86YD1-2;M0QZB9;Q86YD1-3;M0QYH6	Q86YD1;M0QY25;M0QYQ4;M0QYH7;Q86YD1-2;M0QZB9;Q86YD1-3	Prostate tumor-overexpressed gene 1 protein
ZC3H4	24.417	24.3088	23.2488	0	114.71	3082700000	51	Q9UPT8;M0QY97	Q9UPT8;M0QY97	Zinc finger CCCH domain-containing protein 4
HOMER3	20.15	19.1566	19.1081	0.00034965	4.3117	34959000	1	Q9NSC5;Q9NSC5-5;M0QYF9;Q9NSC5-2	Q9NSC5;Q9NSC5-5;M0QYF9;Q9NSC5-2	Homer protein homolog 3
IRF3	21.277	20.2017	21.366	0	17.39	122540000	2	Q14653;M0QYT9;Q14653-3;Q14653-2	Q14653;M0QYT9;Q14653-3;Q14653-2	Interferon regulatory factor 3
AP2S1	22.895	25.7702	25.0162	0	12.242	762240000	11	P53680;M0R0N4;M0QYZ2;M0QZ21;X6R390;P53680-2;M0R1S0	P53680;M0R0N4;M0QYZ2;M0QZ21;X6R390;P53680-2	AP-2 complex subunit sigma
GRAMD1A	19.2396	19.2248	17.2428	0	5.7	53586000	3	Q96CP6;M0QZ12;Q96CP6-2;Q96CP6-3	Q96CP6;M0QZ12;Q96CP6-2;Q96CP6-3	GRAM domain-containing protein 1A
SAMD4B	23.7683	23.7464	22.4425	0	25.972	1124000000	18	Q5PRF9;M0QZ22;M0R0X3;M0QY61;M0QXV2	Q5PRF9;M0QZ22;M0R0X3	Protein Smaug homolog 2
HNRNPM	23.9433	22.8462	22.2089	0.00051055	3.7663	1047000000	5	M0QZM1	M0QZM1
ARHGEF18	20.6127	21.357	19.7364	0	11.919	391300000	10	Q6ZSZ5;M0QZS0;M0R150;Q6ZSZ5-2	Q6ZSZ5;M0QZS0;M0R150;Q6ZSZ5-2	Rho guanine nucleotide exchange factor 18
PRKD2	21.2226	21.7007	20.8631	0	12.622	347090000	9	Q9BZL6;M0QZW1;M0R2R2;M0QXC6;M0R2Z8	Q9BZL6;M0QZW1;M0R2R2	Serine/threonine-protein kinase D2;Serine/threonine-protein kinase
HNRNPM	20.2954	19.6571	17.2749	0	10.221	23162000	2	M0R019	M0R019
RPS5	30.5673	30.2199	28.8954	0	91.198	42708000000	73	P46782;M0R0F0;M0R0R2;M0QZN2	P46782;M0R0F0;M0R0R2;M0QZN2	40S ribosomal protein S5;40S ribosomal protein S5, N-terminally processed
MYO9B	22.0318	22.0987	20.9098	0	66.497	1535400000	39	Q13459;M0R300;M0R0P8;Q13459-2;M0QZY4;M0R2J3	Q13459;M0R300;M0R0P8;Q13459-2	Unconventional myosin-IXb
NAPA	24.0674	25.0844	25.5236	0	40.86	1900400000	30	P54920;M0R0Y2;M0R2M1;M0R213;M0R027;M0R058;Q9H115;M0R0I4;Q9H115-3;Q9H115-2;M0QZM9;M0QZN5;M0R031	P54920;M0R0Y2;M0R2M1	Alpha-soluble NSF attachment protein
CEACAM1	21.5158	22.4723	17.4764	0	26.852	245660000	7	P13688;P13688-8;P13688-9;M0R2K4;M0R109;P13688-7;P13688-3;P13688-4;P13688-11;P13688-2;P13688-6;P13688-5;P13688-10	P13688;P13688-8;P13688-9;M0R2K4;M0R109;P13688-7;P13688-3;P13688-4;P13688-11;P13688-2;P13688-6;P13688-5;P13688-10	Carcinoembryonic antigen-related cell adhesion molecule 1
GPR108	22.2817	21.9361	18.8249	0.00017838	4.7736	236670000	4	Q9NPR9;M0R1G1;M0QYF6;M0QZY1;M0R1Q3	Q9NPR9;M0R1G1;M0QYF6	Protein GPR108
CHMP2A	26.039	25.9252	24.8695	0	6.5589	1927700000	11	O43633;M0R1L7;M0R1T5;M0QXX8	O43633;M0R1L7;M0R1T5	Charged multivesicular body protein 2a
CLPP	24.3732	22.7908	24.0324	0	33.944	738310000	14	Q16740;M0R208;M0QYV5	Q16740;M0R208	ATP-dependent Clp protease proteolytic subunit, mitochondrial;ATP-dependent Clp protease proteolytic subunit
MRPL34	22.9444	23.575	20.8051	0	9.659	156080000	5	Q9BQ48;M0R226	Q9BQ48;M0R226	39S ribosomal protein L34, mitochondrial;Ribosomal protein L34
POLD1	24.1773	24.4652	23.3115	0	113.93	4485400000	80	P28340;M0R2B7;M0QZR8;M0QXE6;M0QXQ2;M0QZB4;M0R3H8	P28340;M0R2B7;M0QZR8	DNA polymerase delta catalytic subunit;DNA polymerase
STAP2	20.0431	19.8247	19.1818	0.00017749	4.6402	42189000	3	Q9UGK3;M0R2W4;Q9UGK3-2;M0R0J5	Q9UGK3;M0R2W4;Q9UGK3-2;M0R0J5	Signal-transducing adaptor protein 2
SUGP2	26.5534	26.5351	25.4467	0	239.41	14035000000	135	Q8IX01;M0R2Z9;Q8IX01-4;Q8IX01-3;M0R3F6;M0R065;M0R216;M0R2Y3	Q8IX01;M0R2Z9;Q8IX01-4;Q8IX01-3;M0R3F6	SURP and G-patch domain-containing protein 2
RABAC1	19.1054	25.1768	23.672	0.00017822	4.7479	275980000	2	Q9UI14;M0R3D4;M0QXH1;M0R1H9	Q9UI14;M0R3D4;M0QXH1;M0R1H9	Prenylated Rab acceptor protein 1
AGPS	28.208	27.8059	26.9733	0	323.31	30743000000	155	O00116;B8ZZ81	O00116	Alkyldihydroxyacetonephosphate synthase, peroxisomal
UBXN8	18.9995	17.18	17.1715	0	18.734	0	1	O00124;O00124-3	O00124;O00124-3	UBX domain-containing protein 8
KIF2A	24.8405	24.6976	22.9566	0	64.698	2792500000	45	O00139-2;O00139;O00139-1;O00139-5;O00139-4;D6R9M0;H0Y8H2;D6RD93	O00139-2;O00139;O00139-1;O00139-5;O00139-4	Kinesin-like protein KIF2A
DDX39A	29.6312	29.1907	28.7498	0	123	45818000000	131	O00148;O00148-2;K7EQN7;B1Q2N1;K7EPJ3;K7EN69;K7ENP6;K7EL56;K7EIL8;K7EN25;F6QWI5;F6U6E2;F6S2B7;F6SXL5	O00148;O00148-2;K7EQN7;B1Q2N1	ATP-dependent RNA helicase DDX39A
PDLIM1	28.6066	29.0873	27.888	0	323.31	26986000000	93	O00151	O00151	PDZ and LIM domain protein 1
ACOT7	26.5255	26.9423	25.4823	0	44.474	6311800000	45	O00154-4;O00154;O00154-6;O00154-7;O00154-5;B4DUX0;O00154-2;K7EKP8;O00154-3;Q6ZUV0	O00154-4;O00154;O00154-6;O00154-7;O00154-5;B4DUX0;O00154-2;K7EKP8;O00154-3	Cytosolic acyl coenzyme A thioester hydrolase
SNAP23	26.9738	26.8591	25.9241	0	66.361	4704400000	51	O00161;H3BM38;O00161-2;H3BNE1;H3BR18;H3BPJ0;H3BV99;H3BP15;H3BQY9;H3BR99;H3BNG6;H3BU94	O00161;H3BM38;O00161-2;H3BNE1;H3BR18;H3BPJ0;H3BV99;H3BP15;H3BQY9	Synaptosomal-associated protein 23;Synaptosomal-associated protein
HAX1	23.6122	23.638	22.1011	0	24.46	727730000	19	O00165;O00165-5;O00165-2;O00165-3;E9PIQ7;Q5VYD6;O00165-4;O00165-6	O00165;O00165-5;O00165-2;O00165-3;E9PIQ7;Q5VYD6;O00165-4	HCLS1-associated protein X-1
AIP	26.7409	27.4515	26.3136	0	69.624	9211800000	67	O00170;E9PMH2;V9GYQ3	O00170;E9PMH2	AH receptor-interacting protein
GTPBP1	24.1763	24.3448	23.3442	0	46.087	1913300000	39	O00178;B0QY59;F5H716;F5H257	O00178	GTP-binding protein 1
STXBP3	23.65	23.7395	22.5504	0	26.458	1304000000	22	O00186	O00186	Syntaxin-binding protein 3
SMAP;C11orf58	27.3796	27.71	26.3747	0	100.69	3148100000	34	O00193;E9PM92;E9PRZ9;E9PQA1	O00193;E9PM92;E9PRZ9	Small acidic protein
AP3B1	25.6443	25.4866	24.5378	0	121.24	8839100000	78	O00203;O00203-3;Q13367;Q13367-3;Q13367-4;H0YBD0;F5GWU4	O00203;O00203-3	AP-3 complex subunit beta-1
LGALS8	23.7144	23.0306	23.1753	0	11.452	1106900000	13	O00214;O00214-2;E9PN19;H7BXD8;F6V2D4;B1ANM0;Q5T3P9;E9PJ77;E9PRN3	O00214;O00214-2;E9PN19;H7BXD8;F6V2D4;B1ANM0;Q5T3P9	Galectin-8;Galectin
TNFRSF10A	22.8853	22.1334	19.109	0	13.67	273630000	7	O00220	O00220	Tumor necrosis factor receptor superfamily member 10A
PSMD11	27.2381	28.1153	27.4891	0	165.59	18357000000	115	O00231;O00231-2;J3QRY4;J3QS13;J3KSW3	O00231;O00231-2	26S proteasome non-ATPase regulatory subunit 11
PSMD12	26.9317	27.3275	26.6899	0	143.95	11051000000	75	O00232;O00232-2;J3KTJ5;J3KSK1	O00232;O00232-2	26S proteasome non-ATPase regulatory subunit 12
PSMD9	24.5201	25.1158	25.6942	0	24.416	1679900000	19	O00233;J3KN29;F5H5V4;F5GX23;O00233-2;F5H7X1;O00233-3;F5H169	O00233;J3KN29;F5H5V4;F5GX23;O00233-2	26S proteasome non-ATPase regulatory subunit 9
CBX4	21.1905	20.7757	18.801	0	9.7754	204180000	8	O00257;O00257-3;F8WCW6	O00257;O00257-3	E3 SUMO-protein ligase CBX4
PGRMC1	29.6842	29.4224	28.0245	0	109.51	19209000000	42	O00264;O00264-2	O00264;O00264-2	Membrane-associated progesterone receptor component 1
SUPT5H	26.579	26.4702	25.4598	0	223.7	15221000000	150	O00267;M0QYL9	O00267	Transcription elongation factor SPT5
SUPT5H	17.625	18.1852	19.8632	0.0047029	2.412	94056000	1	O00267-2	O00267-2	Transcription elongation factor SPT5
TAF4	24.1204	22.5861	21.552	0	101.4	1374600000	29	O00268;V9GY14;V9GY03;Q92750;J3KTH2	O00268	Transcription initiation factor TFIID subunit 4
DFFA	24.5035	24.7612	23.3351	0	25.483	1151100000	17	O00273;O00273-2;K7ERT1	O00273;O00273-2	DNA fragmentation factor subunit alpha
HIP1	19.7312	15.9843	18.0485	0	6.0566	53305000	3	O00291;O00291-3	O00291;O00291-3	Huntingtin-interacting protein 1
CLIC1	29.1519	29.2832	28.3059	0	125.61	27114000000	84	O00299	O00299	Chloride intracellular channel protein 1
EIF3F	28.0328	28.3823	27.3575	0	159.23	13546000000	64	O00303;H0YDT6;E9PQV8	O00303	Eukaryotic translation initiation factor 3 subunit F
WWP2	18.7396	17.9101	17.5578	0.00050925	3.7244	11330000	2	O00308;O00308-3;O00308-2	O00308;O00308-3;O00308-2	NEDD4-like E3 ubiquitin-protein ligase WWP2
CDC7	20.5722	19.3287	17.877	0.00018086	5.0802	29457000	3	O00311	O00311	Cell division cycle 7-related protein kinase
PDHX	26.1559	25.6336	24.0663	0	31.661	4334100000	37	O00330;O00330-3;E9PLU0;E9PRI6;H0YD97;O00330-2	O00330;O00330-3	Pyruvate dehydrogenase protein X component, mitochondrial
DCTN6	25.252	24.9729	22.601	0	7.4655	1134800000	11	O00399;E5RK00	O00399	Dynactin subunit 6
SLC33A1	24.2308	23.5705	22.8676	0	17.229	1185500000	12	O00400;H7C562	O00400	Acetyl-coenzyme A transporter 1
WASL	24.7342	24.5369	23.9179	0	49.818	2108800000	33	O00401	O00401	Neural Wiskott-Aldrich syndrome protein
FOXN3;FOXN2	19.3394	18.1567	17.3047	0.0005083	3.7006	36731000	3	O00409;O00409-2;P32314;H0YJ54;P32314-2	O00409;O00409-2;P32314;H0YJ54;P32314-2	Forkhead box protein N3;Forkhead box protein N2
IPO5	27.4689	27.6185	26.5438	0	323.31	32389000000	193	O00410;O00410-3;H0Y8C6;O00410-2;E7ETV3;E7EQT5;C9JMV5;E7EV12;C9JZD8;C9JZ53;E7EWK4;E7EX05;C9J875;C9JQT6;E7ESA1;E7ESZ1;E7ETV8;C9JXE0	O00410;O00410-3;H0Y8C6;O00410-2	Importin-5
POLRMT	22.8084	21.8704	22.1256	0	50.108	1093800000	35	O00411;K7EMH3;K7ESD1	O00411	DNA-directed RNA polymerase, mitochondrial
EEF2K	20.5207	18.5514	18.4049	0	9.0865	98210000	5	O00418;H3BRH4	O00418;H3BRH4	Eukaryotic elongation factor 2 kinase
IGF2BP3	28.0673	28.1014	27.2249	0	105.86	28428000000	116	O00425;O00425-2;F8WD15	O00425	Insulin-like growth factor 2 mRNA-binding protein 3
DNM1L	25.8336	25.9777	24.9559	0	323.31	9977400000	125	O00429;O00429-3;O00429-6;O00429-5;O00429-7;F8VZ52;B4DPZ9;F8W1W3;B4DDQ3;F8VUJ9;F8VR28;F8VYL3;H0YHY4	O00429;O00429-3;O00429-6;O00429-5;O00429-7	Dynamin-1-like protein
DNM1L	19.8178	19.3866	17.1859	0	26.685	98834000	2	O00429-2;O00429-4;O00429-8;G8JLD5	O00429-2;O00429-4;O00429-8;G8JLD5	Dynamin-1-like protein
RTCA	24.2249	23.2391	22.8564	0	22.789	868990000	14	O00442;O00442-2;A6NIC1	O00442;O00442-2	RNA 3-terminal phosphate cyclase
PIK3C2A	22.2642	22.6431	21.949	0	29.333	2010600000	31	O00443;O00443-2	O00443	Phosphatidylinositol 4-phosphate 3-kinase C2 domain-containing subunit alpha
PIK3R2	22.682	24.0186	21.9526	0	19.156	1402300000	13	O00459;E9PFP1;Q92569;E5RJY0;H0YBC2;F6TDL0;P27986-5;Q92569-3;Q92569-2;P27986-3;P27986-2	O00459;E9PFP1	Phosphatidylinositol 3-kinase regulatory subunit beta
GOLIM4	27.3528	26.5178	25.4598	0	204.25	15128000000	102	O00461;F8W785	O00461;F8W785	Golgi integral membrane protein 4
AGRN	20.9977	21.2612	19.7314	0	49.265	784340000	27	O00468-6;O00468-7;O00468;O00468-3;O00468-5;O00468-4;O00468-2;H0Y5U1	O00468-6;O00468-7;O00468;O00468-3;O00468-5;O00468-4;O00468-2	Agrin;Agrin N-terminal 110 kDa subunit;Agrin C-terminal 110 kDa subunit;Agrin C-terminal 90 kDa fragment;Agrin C-terminal 22 kDa fragment
PLOD2	25.3644	24.479	23.9095	0	82.848	4430000000	56	O00469-2;O00469;E7ETU9;B3KWS3;C9JXZ0;F8WEW3	O00469-2;O00469;E7ETU9	Procollagen-lysine,2-oxoglutarate 5-dioxygenase 2
EXOC5	23.0845	23.1085	22.4447	0	29.052	1259700000	25	O00471;F8W9B8	O00471;F8W9B8	Exocyst complex component 5
ELL2	20.5238	20.0705	19.8466	0	12.159	127850000	5	O00472;O00472-2;D6RC27	O00472;O00472-2	RNA polymerase II elongation factor ELL2
HMGN4	25.2622	23.7049	22.9095	0	7.2014	227430000	6	O00479	O00479	High mobility group nucleosome-binding domain-containing protein 4
NDUFA4	26.4637	26.3443	25.5569	0	5.6361	1569300000	9	O00483	O00483	Cytochrome c oxidase subunit NDUFA4
PSMD14	28.309	28.3127	27.0905	0	105.59	15260000000	79	O00487;C9JW37	O00487	26S proteasome non-ATPase regulatory subunit 14
ZNF593	24.6592	24.1963	20.9946	0	16.649	335200000	10	O00488;A9J4F5	O00488	Zinc finger protein 593
BIN1	23.4104	24.0086	22.6804	0	40.604	1383400000	30	O00499;O00499-10;O00499-2;O00499-9;O00499-7;O00499-8;O00499-4;O00499-6;O00499-11;O00499-3;O00499-5	O00499;O00499-10;O00499-2;O00499-9;O00499-7;O00499-8;O00499-4;O00499-6;O00499-11;O00499-3;O00499-5	Myc box-dependent-interacting protein 1
KPNA3	27.2203	26.8642	26.2004	0	115.34	7842500000	61	O00505;H0Y4S9	O00505	Importin subunit alpha-4
SDCBP	26.8089	26.2172	24.6229	0	106	3603800000	32	O00560;O00560-3;B4DHN5;E9PBU7	O00560;O00560-3;B4DHN5;E9PBU7	Syntenin-1
SDCBP	19.9359	19.9275	19.1185	0.0079902	2.1154	23779000	1	O00560-2;G5EA09	O00560-2;G5EA09	Syntenin-1
PITPNM1	21.0071	20.5361	19.2937	0	12.4	310140000	9	O00562;O00562-2	O00562;O00562-2	Membrane-associated phosphatidylinositol transfer protein 1
MPHOSPH10	25.6681	25.5637	24.2281	0	123.97	4727000000	56	O00566;U3KQ48	O00566	U3 small nucleolar ribonucleoprotein protein MPP10
NOP56	28.6802	28.0249	27.4389	0	249.96	36415000000	161	O00567;Q5JXT2;H0YDU4;H0Y653	O00567;Q5JXT2	Nucleolar protein 56
DDX3X;DDX3Y	28.7091	28.6945	27.7803	0	266.82	53542000000	208	O00571;O00571-2;O15523;O15523-2;O15523-3;C9J081;C9J8G5;B4DLA0;Q9NQI0;Q9NQI0-3;D6RCM4;Q9NQI0-2;Q9NQI0-4;H0Y960	O00571;O00571-2;O15523;O15523-2	ATP-dependent RNA helicase DDX3X;ATP-dependent RNA helicase DDX3Y
CYR61	18.7982	18.9894	16.4218	0.0094512	2.0083	0	1	O00622	O00622	Protein CYR61
PIR	25.9176	26.8897	25.7834	0	78.1	4472400000	36	O00625	O00625	Pirin
KPNA4	26.5591	26.1496	25.2877	0	112.87	4240000000	34	O00629;H7C4F6	O00629	Importin subunit alpha-3
PPP6C	26.1899	24.1021	22.5913	0	31.347	1762800000	15	O00743;O00743-3;O00743-2;Q5T1S7	O00743;O00743-3;O00743-2	Serine/threonine-protein phosphatase 6 catalytic subunit;Serine/threonine-protein phosphatase 6 catalytic subunit, N-terminally processed
MAN2B1	25.0783	24.7811	23.2278	0	93.319	4604300000	55	O00754;O00754-2;M0QZ24;M0R174;M0R2P5;M0QYZ1;M0QZG6	O00754;O00754-2	Lysosomal alpha-mannosidase;Lysosomal alpha-mannosidase A peptide;Lysosomal alpha-mannosidase B peptide;Lysosomal alpha-mannosidase C peptide;Lysosomal alpha-mannosidase D peptide;Lysosomal alpha-mannosidase E peptide
UBE2C	23.0345	24.7309	23.6972	0	12.106	550400000	11	O00762;O00762-4;O00762-3;K4DI81;O00762-2	O00762;O00762-4;O00762-3	Ubiquitin-conjugating enzyme E2 C
PDXK	26.329	26.4188	25.7057	0	105.42	3871000000	59	O00764;F2Z2Y4;O00764-3;O00764-2;A8MV33	O00764;F2Z2Y4;O00764-3;O00764-2	Pyridoxal kinase
SCD	28.2544	27.8128	26.8747	0	83.606	10467000000	45	O00767	O00767	Acyl-CoA desaturase
ARID1A	24.6071	24.2099	23.351	0	145.73	5685200000	95	O14497;O14497-2;O14497-3;H0Y488;H0YEW5;H0YCU6	O14497;O14497-2;O14497-3;H0Y488	AT-rich interactive domain-containing protein 1A
TXNDC9	25.0269	25.7958	24.0454	0	86.359	1991000000	24	O14530;O14530-2;B8ZZX4;F8WCJ3;F8WBV5;G3XAJ4	O14530;O14530-2;B8ZZX4;F8WCJ3	Thioredoxin domain-containing protein 9
NDUFAB1	24.776	23.1737	25.5908	0	6.278	626850000	4	O14561;I3L505;H3BNK3	O14561;I3L505;H3BNK3	Acyl carrier protein, mitochondrial;Acyl carrier protein
CIT	22.1715	21.5638	21.3967	0	46.611	1771000000	32	O14578;O14578-4;H7BYJ3;O14578-3;O14578-2;H0YGG8;F5H4K4	O14578;O14578-4;H7BYJ3;O14578-3	Citron Rho-interacting kinase
COPE	27.3384	28.4074	26.9611	0	134.41	10213000000	73	O14579;M0QXB4;O14579-2;O14579-3;M0R061	O14579;M0QXB4;O14579-2;O14579-3	Coatomer subunit epsilon
AP3D1	26.2687	26.0948	24.6458	0	184.05	11827000000	109	O14617;O14617-5;O14617-4;O14617-2;O14617-3;K7ELX8;K7ERW8	O14617;O14617-5;O14617-4;O14617-2;O14617-3	AP-3 complex subunit delta-1
ABLIM1	23.6125	23.815	21.6109	0	57.662	2215900000	32	O14639-2;O14639;F8W8M4;Q5T6N4;Q5T6N2;Q5JVV3;H0Y3K7	O14639-2;O14639;F8W8M4;Q5T6N4;Q5T6N2;Q5JVV3;H0Y3K7	Actin-binding LIM protein 1
CHD1	22.8572	22.0696	21.2218	0	42.457	1609200000	31	O14646;O14646-2;H0Y8V4	O14646;O14646-2	Chromodomain-helicase-DNA-binding protein 1
CHD2	21.2357	20.3169	18.9666	0	21.911	454240000	16	O14647;O14647-2;B7Z3I4;O14647-3;H3BU65;G3V418	O14647;O14647-2	Chromodomain-helicase-DNA-binding protein 2
TOR1A	24.7968	23.788	23.0242	0	66.692	1010000000	22	O14656;O14656-2	O14656	Torsin-1A
TOR1B	24.717	23.5177	22.4082	0	25.906	1019000000	22	O14657;H0Y7C8	O14657	Torsin-1B
ADAM10	24.6559	24.048	22.8569	0	49.548	2868200000	38	O14672;O14672-2;H0YNC5;H3BS53;H0YK87;C9J9B4	O14672;O14672-2	Disintegrin and metalloproteinase domain-containing protein 10
EI24	23.0585	22.5897	22.1362	0.007857	2.1365	290960000	2	O14681;O14681-3;E9PQN7;E9PK61;E9PLB8;E9PL33;E9PM05;E9PS58	O14681;O14681-3;E9PQN7;E9PK61;E9PLB8;E9PL33;E9PM05;E9PS58	Etoposide-induced protein 2.4 homolog
KMT2D	20.3127	20.4793	19.1116	0	53.73	992890000	34	O14686;O14686-3	O14686;O14686-3	Histone-lysine N-methyltransferase 2D
ZNF197	18.2328	19.9617	18.1226	0.0072846	2.218	12322000	1	O14709;O14709-2	O14709;O14709-2	Zinc finger protein 197
IMPA2	24.3444	24.9164	23.577	0	31.767	1174000000	14	O14732;O14732-2;K7EL65;K7ELF8;Q6PIP6;K7EII9	O14732;O14732-2	Inositol monophosphatase 2
MAP2K7	22.5949	21.4963	22.0798	0	20.388	384070000	12	O14733;O14733-4;O14733-3;O14733-2	O14733;O14733-4;O14733-3;O14733-2	Dual specificity mitogen-activated protein kinase kinase 7
PDCD5	27.977	28.5995	27.6657	0	54.229	9467100000	46	O14737;O14737-2;K7ESJ4;K7EQA1;Q3HM38;X6R2P6	O14737;O14737-2;K7ESJ4;K7EQA1	Programmed cell death protein 5
PRMT5	26.1323	25.7073	24.4712	0	90.535	5972400000	58	O14744;O14744-2;O14744-5;O14744-3;H0YJX6;O14744-4;G3V580;G3V5L5;G3V2X6;G3V2L6;C9JSX3;H0YJ77;H0YJD3;G3V507;G3V2F5;G3V5T6;H7BZ44	O14744;O14744-2;O14744-5;O14744-3;H0YJX6;O14744-4	Protein arginine N-methyltransferase 5;Protein arginine N-methyltransferase 5, N-terminally processed
SLC9A3R1	27.3341	28.2879	27.1465	0	142.4	17876000000	88	O14745;O14745-2;J3QRP6;J3QRA3	O14745;O14745-2;J3QRP6	Na(+)/H(+) exchange regulatory cofactor NHE-RF1
TNFRSF10B	21.3472	21.0474	20.437	0	6.3798	194980000	3	O14763;O14763-2	O14763;O14763-2	Tumor necrosis factor receptor superfamily member 10B
TPP1	26.2978	25.7386	24.9518	0	52.329	4882400000	31	O14773;O14773-2;E7EV34	O14773;O14773-2	Tripeptidyl-peptidase 1
TCERG1	26.1458	25.7019	25.0042	0	103.2	8688100000	87	O14776;O14776-2;G3V220;Q5VWI1	O14776;O14776-2;G3V220	Transcription elongation regulator 1
NDC80	22.6441	23.1299	20.8443	0	19.968	1001700000	13	O14777;I3L4G3;V9GYM9	O14777	Kinetochore protein NDC80 homolog
TNPO2	22.2563	22.8572	21.057	0	21.33	769130000	18	O14787-2;O14787;A0A075B780;K7ESC1;K7ENW1;K7EMA3	O14787-2;O14787;A0A075B780	Transportin-2
POLR3A	22.6086	22.4791	21.5662	0	53.829	1602700000	36	O14802;R4GMX2	O14802	DNA-directed RNA polymerase III subunit RPC1
PSMA7	28.8415	28.8546	28.2722	0	77.977	22287000000	68	O14818;O14818-2;H0Y586;O14818-4;Q8TAA3;Q8TAA3-2;Q8TAA3-5;F5GY34	O14818;O14818-2;H0Y586	Proteasome subunit alpha type-7
SCAMP3	27.0895	27.2872	26.623	0	65.371	5707800000	44	O14828;O14828-2	O14828;O14828-2	Secretory carrier-associated membrane protein 3
OPLAH	23.1912	24.2565	22.6417	0	67.78	2340300000	50	O14841	O14841	5-oxoprolinase
BCKDK	22.6442	22.2801	20.9632	0	50.577	1475600000	11	O14874;O14874-2;O14874-3;H3BTL2;H3BS02;H3BNP3	O14874;O14874-2;O14874-3;H3BTL2;H3BS02	[3-methyl-2-oxobutanoate dehydrogenase [lipoamide]] kinase, mitochondrial
MGST3	22.4728	18.4983	17.6488	0	6.9057	40746000	2	O14880;Q5VV89;Q5VV87	O14880;Q5VV89;Q5VV87	Microsomal glutathione S-transferase 3
TAX1BP3	24.4602	25.2472	24.9747	0	7.4088	505540000	6	O14907	O14907	Tax1-binding protein 3
GIPC1	25.2593	26.174	24.6654	0	24.311	2942900000	19	O14908;O14908-2;K7EM11;K7ESN1;Q8TF64;K7EJ33;K7EIT0	O14908;O14908-2;K7EM11	PDZ domain-containing protein GIPC1
LIN7A	27.2669	26.7354	26.1599	0	47.043	5644900000	28	O14910;H0YIA8;H0YI92;J3KN23	O14910;H0YIA8;H0YI92	Protein lin-7 homolog A
IKBKB	18.5205	20.0036	19.3177	0	13.049	127540000	4	O14920;O14920-2;O14920-4;G3V105;E5RGW5;J3KNS5;O14920-3	O14920;O14920-2;O14920-4;G3V105	Inhibitor of nuclear factor kappa-B kinase subunit beta
RGS12	19.1218	17.4336	16.1154	0	9.5486	69480000	9	O14924;O14924-4;O14924-5;O14924-2;O14924-3;E9PBG5;O14924-7;O14924-6	O14924;O14924-4;O14924-5;O14924-2;O14924-3	Regulator of G-protein signaling 12
TIMM23;TIMM23B	27.0172	26.4769	25.1106	0	50.319	3051000000	25	O14925;Q5SRD1;A0A075B766;E7EP42;S4R2X5	O14925;Q5SRD1;A0A075B766;E7EP42	Mitochondrial import inner membrane translocase subunit Tim23;Putative mitochondrial import inner membrane translocase subunit Tim23B
HAT1	26.6494	26.3939	26.6634	0	97.612	5698600000	61	O14929;O14929-2;F8W9G7;F8WEW1	O14929;O14929-2	Histone acetyltransferase type B catalytic subunit
CASK	24.8249	24.8596	23.6771	0	77.991	4812600000	60	O14936;O14936-3;O14936-4;O14936-6;O14936-2;Q5JS74;Q5JS72;O14936-5;Q5JS79	O14936;O14936-3;O14936-4;O14936-6;O14936-2;Q5JS74	Peripheral plasma membrane protein CASK
PLD2	20.7668	18.601	17.182	0	8.2076	131340000	7	O14939;O14939-4;I3L222;I3L1F3;O14939-3	O14939;O14939-4;I3L222;I3L1F3;O14939-3	Phospholipase D2
UQCRQ	27.3546	26.8991	26.3297	0	32.993	2463000000	25	O14949	O14949	Cytochrome b-c1 complex subunit 8
MYL12B	26.9885	26.2323	25.6849	0	19.697	3665300000	8	O14950	O14950	Myosin regulatory light chain 12B
HGS	24.1267	24.8853	24.3502	0	35.168	2406100000	30	O14964;O14964-2;I3L1P5;I3L1E3;I3L165;I3L2H4	O14964;O14964-2	Hepatocyte growth factor-regulated tyrosine kinase substrate
AURKA	24.9784	24.6344	23.4154	0	25.066	1962800000	19	O14965;Q5QPD4;A3KFJ0;A3KFJ1;Q5QPD2;Q5QPD1;Q9UQB9;Q9UQB9-2;A3KFJ2;B4DXA6;Q5Y191;Q9UQB9-3	O14965;Q5QPD4;A3KFJ0;A3KFJ1;Q5QPD2	Aurora kinase A
RAB29	22.6171	21.9994	17.4898	0.0005152	3.9673	150370000	2	O14966;O14966-2;E9PL56	O14966	Ras-related protein Rab-7L1
CLGN	27.2385	27.0597	26.0406	0	135.58	16956000000	105	O14967;O14967-2;D6RAZ4	O14967;O14967-2	Calmegin
PPP1R12A	25.1787	24.7604	23.9055	0	223.23	5130500000	58	O14974;O14974-4;O14974-5;O14974-3;O14974-2;F8VZN8;H0YHI8;H0YIS4;H0YIM2;H0YIS3;F8VW28;H0YHL8;H0YIL7	O14974;O14974-4;O14974-5;O14974-3;O14974-2;F8VZN8	Protein phosphatase 1 regulatory subunit 12A
SLC27A2	23.1766	21.0845	21.8515	0	24.768	512860000	21	O14975;O14975-2;G3V1R7	O14975;O14975-2;G3V1R7	Very long-chain acyl-CoA synthetase
GAK	23.9593	24.3687	23.1092	0	225.51	3601300000	59	O14976;O14976-2;H0Y8H5;D6RAW3;D6RE78;D6RF16;D6RAQ7;O75061;D6RC24;O75061-4;O75061-2	O14976;O14976-2	Cyclin-G-associated kinase
HNRNPDL	28.5824	28.121	27.3685	0	71.658	22243000000	67	O14979	O14979	Heterogeneous nuclear ribonucleoprotein D-like
HNRNPDL	24.0334	22.9233	23.1717	0	11.329	784530000	7	O14979-3;O14979-2	O14979-3;O14979-2	Heterogeneous nuclear ribonucleoprotein D-like
XPO1	27.4886	27.7607	26.707	0	323.31	32409000000	201	O14980;C9JKM9;C9J673;C9IZS4;C9JQ02;C9JV99;F8WF71;C9JF49;C9IYM2;H7BZC5	O14980	Exportin-1
BTAF1	22.8661	22.5681	21.675	0	65.053	2002400000	37	O14981;O14981-2	O14981	TATA-binding protein-associated factor 172
SPTBN2	26.1621	25.6654	24.358	0	323.31	23980000000	242	O15020;O15020-2;E9PJZ2	O15020;O15020-2	Spectrin beta chain, non-erythrocytic 2
PLXNB2	25.5579	24.9034	23.6949	0	224.87	11449000000	133	O15031;E2PU09;A6QRG9;A6QRH1;H0Y6J7;H0Y7X5;H0YAM9	O15031	Plexin-B2
KHNYN	19.0376	19.0932	17.4556	0	7.8211	58189000	6	O15037;G3V3G3;G3V331	O15037	Protein KHNYN
U2SURP	25.3787	24.8768	23.8218	0	121.61	4431500000	64	O15042;O15042-2;E7ET15;O15042-3;C9JB80;H0Y8D9;E7EW00;H7C4V2;C9J5L1;U3KPT1;C9JDJ7	O15042;O15042-2;E7ET15;O15042-3;C9JB80	U2 snRNP-associated SURP motif-containing protein
SETD1A	20.3212	20.3173	18.974	0	21.921	290200000	12	O15047;C9J2Z9;Q9UPS6;Q9UPS6-2	O15047	Histone-lysine N-methyltransferase SETD1A
ZBTB5	17.8104	18.9733	18.5597	0	5.8242	36289000	1	O15062	O15062	Zinc finger and BTB domain-containing protein 5
KIF3B	23.8598	18.0297	22.5611	0	17.316	1307600000	7	O15066;O15066-2	O15066	Kinesin-like protein KIF3B;Kinesin-like protein KIF3B, N-terminally processed
PFAS	24.9425	25.2015	24.5465	0	108.71	6996800000	67	O15067;H0YGH1;J3QSG0;J3QSH6;J3KTQ5;J3QL39;J3KTL4;J3KT98	O15067	Phosphoribosylformylglycinamidine synthase
NACAD	17.8873	18.5931	18.0975	0.0024077	2.8099	25104000	2	O15069	O15069	NAC-alpha domain-containing protein 1
ANKRD28	23.8225	22.8833	22.5959	0	30.861	1375200000	25	O15084;O15084-1;O15084-4;O15084-2;B4DIW9	O15084;O15084-1;O15084-4;O15084-2;B4DIW9	Serine/threonine-protein phosphatase 6 regulatory ankyrin repeat subunit A
ARHGEF11	17.9136	18.4847	18.7511	0	7.4844	126910000	9	O15085;O15085-2	O15085;O15085-2	Rho guanine nucleotide exchange factor 11
KIAA0391	25.0325	24.2032	22.6629	0	39.365	2366400000	43	O15091;O15091-2;O15091-4;O15091-3	O15091;O15091-2;O15091-4	Mitochondrial ribonuclease P protein 3
CHUK	22.422	21.5154	20.9074	0	17.117	512670000	14	O15111	O15111	Inhibitor of nuclear factor kappa-B kinase subunit alpha
LSM1	22.0199	22.309	22.309	0	5.9271	87869000	4	O15116;E5RJ47;E5RH18	O15116;E5RJ47;E5RH18	U6 snRNA-associated Sm-like protein LSm1
NPC1	23.8961	23.5297	22.2084	0	40.32	2130100000	21	O15118;K7EQ23;O15118-2	O15118;K7EQ23;O15118-2	Niemann-Pick C1 protein
AGPAT2	25.8042	24.1753	23.9432	0	15.554	1444700000	15	O15120;O15120-2	O15120;O15120-2	1-acyl-sn-glycerol-3-phosphate acyltransferase beta
DEGS1	24.3879	23.7286	21.2792	0	6.8664	462460000	6	O15121	O15121	Sphingolipid delta(4)-desaturase DES1
SCAMP1	24.3861	24.6799	22.8449	0	160.66	1065900000	20	O15126;O15126-2	O15126;O15126-2	Secretory carrier-associated membrane protein 1
SCAMP2	26.997	26.1086	25.7035	0	137.16	2424500000	17	O15127;H3BV04;H3BN93;H3BUB6;H3BPL9	O15127	Secretory carrier-associated membrane protein 2
ARPC1B	27.0244	26.803	25.9965	0	67.978	7467700000	52	O15143;C9JBJ7;C9K057;C9J4Z7;F8VXW2;C9JEY1;C9JQM8;C9JFG9;C9J6C8;C9JTT6;C9JM51;F8WEB3	O15143	Actin-related protein 2/3 complex subunit 1B
ARPC2	28.4138	28.4844	27.2665	0	123.12	22678000000	73	O15144;H7C3F9;C9JTV5;G5E9J0;G5E9S7	O15144	Actin-related protein 2/3 complex subunit 2
ARPC3	26.3317	27.2558	27.1604	0	106.84	4108800000	27	O15145;C9JZD1;F8VR50	O15145	Actin-related protein 2/3 complex subunit 3
ZBTB7B	22.5675	22.2066	20.0358	0.00018116	5.1105	240020000	4	O15156;O15156-2	O15156;O15156-2	Zinc finger and BTB domain-containing protein 7B
POLR1C	25.7061	25.2941	24.4164	0	59.661	2432200000	28	O15160;E7EQB9;O15160-2;D6RDJ3;H0Y723	O15160;E7EQB9;O15160-2	DNA-directed RNA polymerases I and III subunit RPAC1
TRIM24	24.0505	23.7889	23.0588	0	112.22	2928700000	46	O15164;O15164-2	O15164;O15164-2	Transcription intermediary factor 1-alpha
PGRMC2	28.2492	27.0882	26.6819	0	32.137	6435500000	30	O15173;O15173-2;U3KQM0;D3DNX8	O15173;O15173-2	Membrane-associated progesterone receptor component 2
PFDN6	21.5829	24.7132	25.5218	0	13.098	635430000	9	O15212;A2AB88	O15212;A2AB88	Prefoldin subunit 6
WDR46	24.0277	23.0857	23.9113	0	38.911	1204600000	16	O15213;H0Y6G3	O15213	WD repeat-containing protein 46
GSTA4	20.1257	20.3051	19.1312	0.0040977	2.4867	39179000	1	O15217;O15217-2	O15217;O15217-2	Glutathione S-transferase A4
NKRF	22.9194	22.0143	20.6027	0	26.849	685600000	19	O15226;O15226-2	O15226;O15226-2	NF-kappa-B-repressing factor
GNPAT	23.8677	23.5731	22.5852	0	41.007	1516600000	30	O15228;O15228-2;Q5TBH8;Q5TBH6	O15228;O15228-2;Q5TBH8	Dihydroxyacetone phosphate acyltransferase
LAMA5	20.1995	19.8355	17.4242	0	39.099	671600000	17	O15230	O15230	Laminin subunit alpha-5
CASC3	21.2415	19.586	20.407	0	14.581	214560000	8	O15234;J3QSC4;J3KSY7	O15234	Protein CASC3
MRPS12	25.3599	25.2967	24.0026	0.00035063	4.3712	940580000	5	O15235	O15235	28S ribosomal protein S12, mitochondrial
ACOX3	24.417	23.7659	22.9887	0	72.711	2563700000	48	O15254;O15254-2;D6RJ89	O15254;O15254-2	Peroxisomal acyl-coenzyme A oxidase 3
RER1	26.8802	25.9073	25.227	0	13.837	2221000000	19	O15258;Q5T092;Q5T091;Q5T093	O15258;Q5T092;Q5T091;Q5T093	Protein RER1
SURF4	29.9473	29.2573	28.4005	0	46.445	28181000000	44	O15260;Q5T8U5;O15260-2;O15260-3	O15260;Q5T8U5;O15260-2;O15260-3	Surfeit locus protein 4
SPTLC1	25.1573	24.4103	23.7093	0	51.467	2007500000	28	O15269;O15269-2	O15269	Serine palmitoyltransferase 1
SPTLC2	18.3211	18.0343	17.262	0	8.5451	25606000	7	O15270;H0YJV2	O15270;H0YJV2	Serine palmitoyltransferase 2
OGT	26.0188	25.9426	24.4245	0	194.55	9545000000	99	O15294;O15294-3;O15294-2;O15294-4;C9JZL3;H7C2T7	O15294;O15294-3;O15294-2;O15294-4	UDP-N-acetylglucosamine--peptide N-acetylglucosaminyltransferase 110 kDa subunit
PMM2	25.0385	25.9888	23.9385	0	24.725	2227100000	20	O15305;H3BV55;H3BPH4;H3BRM0;O15305-2;H3BR08;H3BM92;H3BV34;H3BT06;H3BNY9	O15305;H3BV55;H3BPH4;H3BRM0	Phosphomannomutase 2;Phosphomannomutase
PPM1G	26.4793	26.5455	25.5226	0	167.14	7322600000	72	O15355	O15355	Protein phosphatase 1G
INPPL1	17.6795	18.0696	18.0428	0	8.7082	68700000	5	O15357;O15357-2;H7BXR2;H0YFZ4	O15357;O15357-2	Phosphatidylinositol 3,4,5-trisphosphate 5-phosphatase 2
EIF3D	27.4038	27.0213	26.1399	0	142.01	12998000000	58	O15371;O15371-2;O15371-3;B0QYA5;B0QYA4;B0QYA6;B0QYA7;B0QYA8	O15371;O15371-2;O15371-3;B0QYA5	Eukaryotic translation initiation factor 3 subunit D
HDAC3	23.5956	21.789	21.4795	0	25.196	570640000	12	O15379;O15379-2;E7ESJ6;E7EW19	O15379;O15379-2	Histone deacetylase 3
NVL	23.4961	23.6486	22.5365	0	47.619	1907600000	37	O15381;O15381-5;H0Y8B6;O15381-2;O15381-3;O15381-4;E7ERY0;E7EWK7;E9PH71;E9PGD8;C9J6P7;C9JP83;F8WF01	O15381;O15381-5;H0Y8B6;O15381-2;O15381-3;O15381-4	Nuclear valosin-containing protein-like
BCAT2	26.4505	25.4276	25.4556	0	66.265	4199800000	40	O15382;B3KSI3;M0QXF9;M0QZ10;O15382-2;M0QZP4;M0R2K7	O15382;B3KSI3;M0QXF9;M0QZ10;O15382-2;M0QZP4	Branched-chain-amino-acid aminotransferase, mitochondrial;Branched-chain-amino-acid aminotransferase
YY2	20.1243	21.2871	20.8214	0.00050899	3.7232	90666000	8	O15391;Q96MM3	O15391	Transcription factor YY2
IPO8	22.1901	22.4475	21.7737	0	31.116	861250000	21	O15397;O15397-2;F5H2I3;H0YH64;F5H244	O15397;O15397-2	Importin-8
STX7	26.9038	26.5003	24.8833	0	78.941	3420800000	28	O15400;O15400-2	O15400;O15400-2	Syntaxin-7
SLC16A3	19.6057	20.9502	21.1564	0.0006708	3.519	132100000	3	O15427	O15427	Monocarboxylate transporter 4
SLC31A1	28.413	28.0133	28.0239	0	7.3352	2289400000	14	O15431	O15431	High affinity copper uptake protein 1
ABCC4	22.133	20.9454	19.9038	0	44.572	653620000	21	O15439;O15439-2;O15439-3;B7Z3Q7	O15439;O15439-2;O15439-3;B7Z3Q7	Multidrug resistance-associated protein 4
ABCC5	21.2173	18.7604	18.94	0	12.354	300540000	15	O15440;O15440-5;C9JZL5;A5PKY6;F8WCY8;O15440-4;O15440-3;O15440-2	O15440;O15440-5	Multidrug resistance-associated protein 5
CD3EAP	25.3873	24.7849	22.8363	0	141.73	1942200000	24	O15446;O15446-2	O15446;O15446-2	DNA-directed RNA polymerase I subunit RPA34
P4HA2	24.8585	24.0717	23.2099	0	82.562	2299600000	36	O15460-2;O15460;C9JCP0;C9JX45;A8MXE0;E7ERI1;E7ENX0;E7EPI9;C9JN43;C9JIG4	O15460-2;O15460	Prolyl 4-hydroxylase subunit alpha-2
MAGEB2	23.4414	22.5515	22.6205	0	15.984	381040000	14	O15479;O15481;Q96LZ2;P43366;Q9UBF1	O15479	Melanoma-associated antigen B2
YKT6	23.6804	24.6266	24.2605	0	9.7439	855720000	7	O15498;O15498-2	O15498;O15498-2	Synaptobrevin homolog YKT6
NUPL2	24.4839	24.2449	23.2211	0	51.731	1377100000	20	O15504;C9JYA1;O15504-2;O15504-3;B4DT96	O15504;C9JYA1;O15504-2	Nucleoporin-like protein 2
ARPC5	26.851	26.7882	26.2866	0	23.653	3629800000	13	O15511;B1ALC0;O15511-2	O15511;B1ALC0;O15511-2	Actin-related protein 2/3 complex subunit 5
RNF113A	21.4072	23.5702	21.7955	0	12.305	527060000	10	O15541	O15541	RING finger protein 113A
DHX15	29.2196	28.8234	28.1277	0	271.58	69226000000	271	O43143	O43143	Pre-mRNA-splicing factor ATP-dependent RNA helicase DHX15
RNMT	25.3331	25.0701	23.2507	0	28.275	2956500000	34	O43148;O43148-2;K7EP06;K7EPP5;K7ERH6	O43148;O43148-2;K7EP06	mRNA cap guanine-N7 methyltransferase
ZZEF1	17.4923	18.4434	17.649	0	13.469	132320000	13	O43149;O43149-3;I3L1Q8;I3L141;O43149-2	O43149	Zinc finger ZZ-type and EF-hand domain-containing protein 1
FLRT2	20.1037	19.2004	17.7062	0.00017895	4.8431	66022000	2	O43155	O43155	Leucine-rich repeat transmembrane protein FLRT2
TTI1	23.1885	22.9554	20.0386	0	45.735	1026100000	18	O43156	O43156	TELO2-interacting protein 1 homolog
PLXNB1	22.2019	21.1649	20.5519	0	32.127	834050000	16	O43157;O43157-2;Q9ULL4;Q9ULL4-2;H7C0P4;H7BZV5;O43157-3	O43157;O43157-2	Plexin-B1
RRP8	24.4182	23.5793	22.517	0	30.481	1331600000	27	O43159;E9PPY3;E9PPP6	O43159;E9PPY3	Ribosomal RNA-processing protein 8
PJA2	21.9777	19.668	17.9491	0	23.2	182940000	6	O43164;O43164-2	O43164;O43164-2	E3 ubiquitin-protein ligase Praja-2
SIPA1L1	21.9016	20.8611	21.5395	0	11.561	1017300000	14	O43166;O43166-2;O43166-3;F5GYF8;H0YJY2	O43166;O43166-2;O43166-3;F5GYF8	Signal-induced proliferation-associated 1-like protein 1
PRPF4	26.014	25.205	24.3564	0	63.372	5159900000	60	O43172;O43172-2	O43172;O43172-2	U4/U6 small nuclear ribonucleoprotein Prp4
PHGDH	28.0304	28.2327	27.3234	0	127.37	21861000000	88	O43175;Q5SZU1	O43175;Q5SZU1	D-3-phosphoglycerate dehydrogenase
NDUFS4	24.9828	24.344	23.1723	0	5.8011	743500000	10	O43181;H0Y9M8	O43181	NADH dehydrogenase [ubiquinone] iron-sulfur protein 4, mitochondrial
IRAK2	20.3259	19.3419	17.2624	0.0022592	2.8875	29304000	2	O43187	O43187	Interleukin-1 receptor-associated kinase-like 2
DYNC1LI2	23.2507	23.2867	23.2518	0	139.23	1071800000	25	O43237;O43237-2;J3KRI4;J3KRZ2;B4E2E0;J3KSD2;H3BUM4	O43237;O43237-2;J3KRI4	Cytoplasmic dynein 1 light intermediate chain 2
PSMD3	27.7177	27.398	26.5833	0	226.32	21875000000	138	O43242;O43242-2;H0YGV8;F5H8K4	O43242;O43242-2	26S proteasome non-ATPase regulatory subunit 3
RBFOX2;RBFOX1	25.9461	25.0606	23.6126	0	44.294	1865800000	28	O43251-6;O43251-8;O43251;O43251-10;B0QYV1;O43251-3;O43251-5;O43251-2;Q9NWB1;O43251-9;S4R3K7;S4R469;F8VR27;F8VZY7;B0QYY4;F8VRS4;J3KNW3;B7Z1U7;F8VZG9;Q9NWB1-3;O43251-4;Q9NWB1-4;Q9NWB1-5;O43251-7;Q9NWB1-2;A6NFN3;I3L1D4;J3QRF4;A6NFN3-2;B0QYY6;B0QYY7;J3QQZ2	O43251-6;O43251-8;O43251;O43251-10;B0QYV1;O43251-3;O43251-5;O43251-2;Q9NWB1;O43251-9;S4R3K7;S4R469;F8VR27;F8VZY7;B0QYY4;F8VRS4;J3KNW3;B7Z1U7;F8VZG9;Q9NWB1-3;O43251-4;Q9NWB1-4;Q9NWB1-5;O43251-7;Q9NWB1-2	RNA binding protein fox-1 homolog 2;RNA binding protein fox-1 homolog;RNA binding protein fox-1 homolog 1
PAPSS1	24.7943	25.006	23.5659	0	81.416	3172400000	31	O43252	O43252	Bifunctional 3-phosphoadenosine 5-phosphosulfate synthase 1;Sulfate adenylyltransferase;Adenylyl-sulfate kinase
ZW10	24.9304	24.5047	24.0285	0	125.44	3452200000	54	O43264;O43264-2;F5H3C1	O43264;O43264-2	Centromere/kinetochore protein zw10 homolog
SART1	25.8287	25.7074	24.3088	0	157.07	6576800000	81	O43290;E9PQI8	O43290	U4/U6.U5 tri-snRNP-associated protein 1
GPAA1	24.7499	23.2605	23.1356	0	17.329	1019500000	11	O43292;O43292-2;E9PPZ9;E9PLV6;E9PQ31;E9PM11;E9PLG8;E9PM94	O43292;O43292-2;E9PPZ9;E9PLV6;E9PQ31	Glycosylphosphatidylinositol anchor attachment 1 protein
DAPK3	22.0992	22.0272	20.1096	0	9.898	318240000	13	O43293;O43293-2;M0R0D0;M0QYW5	O43293;O43293-2	Death-associated protein kinase 3
AP5Z1	18.4331	17.7189	17.8222	0	7.0821	81259000	5	O43299;O43299-2;O43299-3	O43299;O43299-2	AP-5 complex subunit zeta-1
PPIP5K2	22.2686	22.7006	21.5161	0	30.767	1170600000	28	O43314;O43314-2;Q6PFW1;D6RFG4;D6RBU4;F8W9A8;B7WPL9;Q6PFW1-6;Q6PFW1-5;Q6PFW1-7;Q6PFW1-4;Q6PFW1-3;Q6PFW1-2	O43314;O43314-2	Inositol hexakisphosphate and diphosphoinositol-pentakisphosphate kinase 2
MAP3K7;DKFZp586F0420	22.1472	22.9565	22.1564	0	45.628	662980000	15	O43318;O43318-2;O43318-4;O43318-3;Q9UG54	O43318;O43318-2;O43318-4;O43318-3;Q9UG54	Mitogen-activated protein kinase kinase kinase 7
EEF1E1;EEF1E1-BLOC1S5	25.8817	25.9265	25.3505	0	35.772	2171200000	18	O43324;D6RBD7;C9J1V9;O43324-2;H0YAL7;D6RCQ0;H0YAH9	O43324;D6RBD7;C9J1V9;O43324-2;H0YAL7	Eukaryotic translation elongation factor 1 epsilon-1
MSI1	24.8658	24.1605	22.0607	0	20.672	1019300000	19	O43347;H0YHB7	O43347;H0YHB7	RNA-binding protein Musashi homolog 1
WDR62	22.8909	23.1921	22.0681	0	73.565	2164100000	37	O43379;O43379-4;O43379-3;O43379-2;H7C3R4	O43379;O43379-4	WD repeat-containing protein 62
HNRNPR	29.0727	28.3762	27.6174	0	302.33	47510000000	173	O43390;O43390-3;B4DT28	O43390;O43390-3;B4DT28	Heterogeneous nuclear ribonucleoprotein R
HNRNPR	20.7613	19.027	17.4274	0.0019439	2.9611	60432000	0	O43390-2;O43390-4	O43390-2;O43390-4	Heterogeneous nuclear ribonucleoprotein R
PRPF3	25.2651	25.2136	24.3645	0	61.371	4237300000	40	O43395;O43395-3	O43395;O43395-3	U4/U6 small nuclear ribonucleoprotein Prp3
TXNL1	27.5528	27.762	26.8329	0	127.28	10830000000	68	O43396;K7ER96;K7EML9;K7EPB7;K7EKG2;K7EME7	O43396;K7ER96	Thioredoxin-like protein 1
TPD52L2	27.1351	27.4755	27.091	0	151.05	6137400000	44	O43399;O43399-5;O43399-7;O43399-2;O43399-4;O43399-3;O43399-6	O43399;O43399-5;O43399-7;O43399-2;O43399-4;O43399-3;O43399-6	Tumor protein D54
EMC8	21.8889	22.8053	20.2018	0	7.8141	246300000	5	O43402;M0R1B0;O43402-2	O43402;M0R1B0	ER membrane protein complex subunit 8
COCH	23.8327	23.5254	22.8232	0	23.623	1271400000	23	O43405;H0YJW4;G3V4C4;O43405-2;G3V5X3;G3V5V4	O43405;H0YJW4;G3V4C4;O43405-2	Cochlin
PRKRIR	19.85	18.5703	17.8999	0.00018047	5.0351	45534000	4	O43422;O43422-2	O43422;O43422-2	52 kDa repressor of the inhibitor of the protein kinase
EIF4G3	21.9963	22.5714	21.2871	0	50.937	1455800000	37	O43432;O43432-3;O43432-4;B1AN89;O43432-2;Q5SWD0	O43432;O43432-3;O43432-4	Eukaryotic translation initiation factor 4 gamma 3
PPIH	26.0904	26.7733	25.0411	0	49.935	2908600000	23	O43447;C9JQD4;O43447-2;H0YEL5;A6NM32	O43447;C9JQD4;O43447-2;H0YEL5	Peptidyl-prolyl cis-trans isomerase H;Peptidyl-prolyl cis-trans isomerase
SUV39H1	22.6446	17.7997	19.5585	0	11.18	188480000	6	O43463;O43463-2	O43463;O43463-2	Histone-lysine N-methyltransferase SUV39H1
HTRA2	22.2747	22.5548	20.9469	0	5.7174	384360000	5	O43464;O43464-3;O43464-2;O43464-4	O43464;O43464-3;O43464-2;O43464-4	Serine protease HTRA2, mitochondrial
OIP5	21.1396	22.7541	20.3614	0	34.33	144500000	3	O43482;H0YKL4	O43482;H0YKL4	Protein Mis18-beta;Protein yippee-like
AKR7A2	25.8983	25.116	24.2943	0	21.342	2167400000	22	O43488;H3BLU7;Q8NHP1;H7C5H7	O43488;H3BLU7	Aflatoxin B1 aldehyde reductase member 2
PROM1	22.9148	22.1096	21.2821	0	77.847	1150400000	26	O43490;O43490-2;O43490-5;O43490-3;O43490-4;O43490-6;O43490-7;H0Y9D4;H0Y9Q5	O43490;O43490-2;O43490-5;O43490-3;O43490-4;O43490-6;O43490-7	Prominin-1
EPB41L2	26.6952	26.2326	25.5799	0	236.67	17591000000	138	O43491;Q6R5J7;E9PMV8;Q6ZSX4;E9PN54	O43491	Band 4.1-like protein 2
LAMTOR5	26.1962	26.6232	26.1627	0	59.379	1743100000	17	O43504;R4GMU8;E9PLX3	O43504;R4GMU8;E9PLX3	Ragulator complex protein LAMTOR5
B4GAT1	27.4518	26.5025	25.6812	0	105.78	7920900000	33	O43505	O43505	Beta-1,4-glucuronyltransferase 1
CA12	23.9226	24.1426	23.7957	0	9.331	815310000	8	O43570;O43570-2;B3KUB4	O43570;O43570-2;B3KUB4	Carbonic anhydrase 12
XPOT	24.6567	25.3816	23.8292	0	52.696	4489200000	46	O43592;F8WDU6;F5GZM3;F5GYW6	O43592	Exportin-T
TIMM44	27.6277	26.6288	25.8012	0	112.06	13468000000	75	O43615;M0QXU7;M0R301;M0QXM9;M0R124	O43615;M0QXU7	Mitochondrial import inner membrane translocase subunit TIM44
TRAPPC3	24.5778	24.9181	23.2571	0	9.1849	600920000	6	O43617;O43617-2;A6NKE1	O43617;O43617-2	Trafficking protein particle complex subunit 3
NCK2	19.1598	21.0272	16.5192	0	5.4913	71230000	3	O43639;E7EPF5	O43639;E7EPF5	Cytoplasmic protein NCK2
TSPAN6	21.3568	20.7565	19.6895	0.00051038	3.7649	77668000	4	O43657	O43657	Tetraspanin-6
PLRG1	26.4437	26.1956	25.3039	0	86.145	8702400000	64	O43660;O43660-2;D6RA26;H0YA24;B7Z982;H0YAA2	O43660;O43660-2	Pleiotropic regulator 1
PRC1	24.8128	24.1617	22.6694	0	47.837	2243400000	29	O43663;O43663-2;O43663-4;O43663-3;H0YL53;G3V3N7;H0YM42;H0YLA0;H0YNE4	O43663;O43663-2;O43663-4;O43663-3	Protein regulator of cytokinesis 1
ZNF207	26.8291	26.906	25.9342	0	63.311	5426800000	34	O43670-2;O43670;J3QRS9;X6R4W8;O43670-4;O43670-3;J3KS31;J3QS27;J3KTL1;J3KRB6;J3KRW6;H0Y3M2	O43670-2;O43670;J3QRS9;X6R4W8;O43670-4;O43670-3;J3KS31	BUB3-interacting and GLEBS motif-containing protein ZNF207
NDUFB3	25.896	25.3921	24.9767	0	5.6923	1096000000	12	O43676;C9JKQ2	O43676;C9JKQ2	NADH dehydrogenase [ubiquinone] 1 beta subcomplex subunit 3
NDUFA2	21.9979	22.5421	20.8447	0	9.621	73071000	4	O43678;O43678-2	O43678;O43678-2	NADH dehydrogenase [ubiquinone] 1 alpha subcomplex subunit 2
ASNA1	26.1885	25.9316	24.8166	0	40.09	3410100000	35	O43681;K7ERW9	O43681	ATPase ASNA1
BUB3	27.7125	27.7726	26.4275	0	116.25	10304000000	59	O43684;O43684-2;J3QT28;J3QSX4	O43684;O43684-2;J3QT28	Mitotic checkpoint protein BUB3
ACTN4	30.2482	30.2581	29.0318	0	323.31	223000000000	499	O43707;O43707-2;F5GXS2;O43707-3;H7C144;Q08043;K7EP19;B7Z4P8	O43707;O43707-2	Alpha-actinin-4
WBSCR22	24.2187	24.3754	23.1923	0	20.108	705930000	17	O43709;O43709-3;H7C170;H7C0G4	O43709;O43709-3;H7C170	Probable 18S rRNA (guanine-N(7))-methyltransferase
HTATSF1	23.1519	24.8897	22.3507	0	146.73	3526000000	30	O43719;Q5H919;Q5H918	O43719;Q5H919;Q5H918	HIV Tat-specific factor 1
PRKAB2	22.6638	23.464	22.3394	0	21.635	551460000	15	O43741;O43741-2	O43741;O43741-2	5-AMP-activated protein kinase subunit beta-2
AP1G1	25.8905	25.2196	24.6076	0	153.13	5657100000	52	O43747;O43747-2;H3BNR4;H3BR36;H3BUN9;B3KNW1;H3BN75;H3BNN2;H3BS13;H3BV30;H3BRM7;H3BN71;B4DGE1	O43747;O43747-2	AP-1 complex subunit gamma-1
STX6	21.6991	21.9136	22.1233	0	9.2216	194430000	3	O43752;O43752-2	O43752;O43752-2	Syntaxin-6
SGTA	26.5047	26.6012	25.8289	0	21.369	3682400000	27	O43765;K7EMD6	O43765;K7EMD6	Small glutamine-rich tetratricopeptide repeat-containing protein alpha
SLC25A20	27.5199	26.7689	25.9127	0	59.215	8139600000	44	O43772;C9JPE1;F8WEF6	O43772;C9JPE1	Mitochondrial carnitine/acylcarnitine carrier protein
NARS	27.1097	27.1308	25.7985	0	162.65	9456000000	86	O43776;K7EIU7;O43776-2;K7EJ19;K7EPK2;K7EQ35;K7EMQ6;REV__H7C110;REV__H7BZ55	O43776	Asparagine--tRNA ligase, cytoplasmic
SSNA1	21.7214	23.5517	22.7557	0	8.2261	219560000	5	O43805	O43805	Sjoegren syndrome nuclear autoantigen 1
NUDT21	27.4014	27.1318	26.389	0	94.766	6853100000	43	O43809;H3BND3;H3BV41	O43809;H3BND3	Cleavage and polyadenylation specificity factor subunit 5
STRN	20.0263	19.5284	18.7509	0	6.5529	129840000	4	O43815;O43815-2	O43815;O43815-2	Striatin
RRP9	25.2524	24.515	24.5696	0	16.194	2720300000	18	O43818	O43818	U3 small nucleolar RNA-interacting protein 2
SCO2	25.6782	24.969	22.332	0	33.716	1701800000	17	O43819;C9JBU1	O43819	Protein SCO2 homolog, mitochondrial
AKAP8	25.5782	25.227	23.8723	0	109.92	3472200000	42	O43823;M0QYL4	O43823	A-kinase anchor protein 8
SLC37A4	25.9461	22.5693	22.6343	0	50.033	1112800000	8	O43826;U3KPU7;U3KQV0;U3KQS2;O43826-2;U3KQL4	O43826;U3KPU7;U3KQV0;U3KQS2;O43826-2;U3KQL4	Glucose-6-phosphate translocase
IDH3B	26.7596	26.5317	26.0917	0	58.119	8019500000	68	O43837;O43837-2;O43837-3	O43837;O43837-2	Isocitrate dehydrogenase [NAD] subunit beta, mitochondrial
CALU	30.225	29.6574	28.8095	0	270.54	50946000000	129	O43852;O43852-3;O43852-6;O43852-5;O43852-15;O43852-10;H0Y875;O43852-9;O43852-13;O43852-14;O43852-11;O43852-12	O43852;O43852-3;O43852-6;O43852-5;O43852-15;O43852-10;H0Y875;O43852-9	Calumenin
CALU	25.4226	25.41	24.6936	0.00051591	4.0138	2671300000	9	O43852-4;O43852-2;O43852-8;O43852-7	O43852-4;O43852-2;O43852-8	Calumenin
AHCYL1	25.3299	25.5327	22.837	0	42.863	2974500000	36	O43865;O43865-2	O43865;O43865-2	Putative adenosylhomocysteinase 2
KIF1C	20.7896	21.1101	19.7835	0	14.714	375100000	7	O43896	O43896	Kinesin-like protein KIF1C
GAS2	23.9599	23.7586	22.7608	0	17.753	876740000	12	O43903;E9PRR5;E9PQ74;E9PQ37;E9PM28;O43903-2	O43903;E9PRR5;E9PQ74	Growth arrest-specific protein 2
ORC5	23.8712	23.1801	22.0307	0	31.453	1061700000	19	O43913;O43913-2;G3V0H0	O43913;O43913-2	Origin recognition complex subunit 5
NDUFS5	26.9863	26.2556	25.2923	0	11.607	1714100000	11	O43920	O43920	NADH dehydrogenase [ubiquinone] iron-sulfur protein 5
PDE6D	18.1003	17.9013	22.148	0	5.9176	18589000	2	O43924;B8ZZK5;C9IZ52	O43924;B8ZZK5;C9IZ52	Retinal rod rhodopsin-sensitive cGMP 3,5-cyclic phosphodiesterase subunit delta
ORC4	24.2813	24.2104	21.8674	0	55.299	1265500000	14	O43929;O43929-2;O43929-3;CON__Q2YDI2;C9JGH7;C9J2X8;Q53SE3	O43929;O43929-2;O43929-3	Origin recognition complex subunit 4
PEX1	21.3057	20.4078	19.3915	0	15.079	301700000	15	O43933;E9PE75;H7BZH3	O43933;E9PE75	Peroxisome biogenesis factor 1
RAD21	25.6367	24.7911	23.8337	0	80.527	3174500000	58	O60216;E5RFZ5;E5RFV8;E5RIN7;E5RG18;E5RJW1;E5RJK5;E5RI01	O60216	Double-strand-break repair protein rad21 homolog
AKR1B10	22.7731	24.3164	24.1646	0	17.258	1015100000	15	O60218	O60218	Aldo-keto reductase family 1 member B10
TIMM8A	23.4305	24.0312	23.197	0	19.277	190320000	8	O60220	O60220	Mitochondrial import inner membrane translocase subunit Tim8 A
DHX16	23.6401	23.6943	21.8594	0	87.4	1935400000	43	O60231;Q5SQH5;A2AB15	O60231;Q5SQH5	Putative pre-mRNA-splicing factor ATP-dependent RNA helicase DHX16
MED14	21.0319	21.3366	20.1366	0	33.03	530410000	17	O60244;H7C3E5;H7C017	O60244	Mediator of RNA polymerase II transcription subunit 14
PRPSAP2	24.0772	23.7632	21.8143	0	26.015	876410000	18	O60256;O60256-3;E7EPA1;O60256-4;O60256-2;C9JJS3;C9K0K7;I3L0S1;C9JDU5;C9JDH0;E7EW35;I3L331;I3L164;I3L4G9	O60256;O60256-3;E7EPA1;O60256-4;O60256-2;C9JJS3;C9K0K7;I3L0S1	Phosphoribosyl pyrophosphate synthase-associated protein 2
SMARCA5	27.4907	26.6546	25.7073	0	229.04	24172000000	166	O60264	O60264	SWI/SNF-related matrix-associated actin-dependent regulator of chromatin subfamily A member 5
SPAG9	21.4581	22.2099	20.1524	0	68.718	948960000	21	O60271;O60271-2;O60271-4;O60271-9;O60271-5;O60271-3;D6RHI8;H0YBE9	O60271;O60271-2;O60271-4;O60271-9;O60271-5;O60271-3	C-Jun-amino-terminal kinase-interacting protein 4
URB1	23.1048	22.062	21.4538	0	97.357	2211900000	45	O60287	O60287	Nucleolar pre-ribosomal-associated protein 1
SIPA1L3	23.079	22.7756	22.1531	0	57.648	2526600000	49	O60292;M0R185;M0R2Q7;M0R2W1	O60292	Signal-induced proliferation-associated 1-like protein 3
ZFC3H1	20.3363	20.6466	18.6326	0	19.907	332530000	16	O60293;O60293-2;G3V1X1;O60293-4	O60293;O60293-2	Zinc finger C3H1 domain-containing protein
LZTS3	20.8313	20.897	19.1035	0	9.3639	191070000	6	O60299;O60299-2	O60299;O60299-2	Leucine zipper putative tumor suppressor 3
AQR	23.9359	23.8604	22.5569	0	122.58	3370700000	52	O60306;H0YH15;H0YLN9	O60306	Intron-binding protein aquarius
OPA1	25.2248	24.8641	24.3746	0	116.27	6862300000	88	O60313-2;O60313;E5KLK1;E5KLJ9;E5KLJ5;E5KLJ6;H7C141;C9JY58;H7C3G2;H7C321	O60313-2;O60313;E5KLK1;E5KLJ9;E5KLJ5;E5KLJ6	Dynamin-like 120 kDa protein, mitochondrial;Dynamin-like 120 kDa protein, form S1
MCM3AP	20.2452	20.2326	19.3431	0	18.067	396970000	13	O60318;O60318-2	O60318;O60318-2	Germinal-center associated nuclear protein
PIP5K1C	21.6555	19.2387	17.0808	0.00017976	4.9487	89188000	2	O60331;O60331-4;O60331-2;O60331-3	O60331;O60331-4;O60331-2;O60331-3	Phosphatidylinositol 4-phosphate 5-kinase type-1 gamma
KIF1B	21.5872	21.1921	20.4595	0	51.242	852320000	17	O60333;O60333-2;O60333-4;O60333-3	O60333;O60333-2;O60333-4;O60333-3	Kinesin-like protein KIF1B
KDM1A	25.6161	25.1942	24.141	0	82.631	5097500000	71	O60341;O60341-2;R4GMP9;R4GMQ1	O60341;O60341-2	Lysine-specific histone demethylase 1A
TBC1D4	21.7044	22.4843	21.8616	0	35.44	1033500000	22	O60343;O60343-2;O60343-3;O60343-4;O60343-5;Q5JU47	O60343;O60343-2;O60343-3	TBC1 domain family member 4
ECE2	22.7064	22.7226	22.7636	0	9.0996	432100000	9	O60344-4;O60344	O60344-4;O60344	Endothelin-converting enzyme 2;Methyltransferase-like region;Endothelin-converting enzyme 2 region
TBC1D12	17.7496	18.109	17.1133	0.0087023	2.0368	19621000	1	O60347	O60347	TBC1 domain family member 12
FADS1	27.3659	26.5287	25.6854	0	139.62	8132300000	53	O60427;O60427-2;H7C2V0;F5H8G5;H0YB97;F5H3P6;F5H852;F5GWE3;F5H3U5;C9J425;F5H1Q7;F5H0Y2;F5H2H3;F5H5X5;C9JJB3;F5GYH4	O60427;O60427-2	Fatty acid desaturase 1
DFNA5	22.7355	22.8841	21.2984	0	24.681	529300000	14	O60443;H7C3W1;O60443-3;H7C147;H7BZJ0;O60443-2	O60443;H7C3W1;O60443-3	Non-syndromic hearing impairment protein 5
MAN1A2	23.1126	21.5928	20.307	0	13.924	433180000	15	O60476;H0Y7H1	O60476	Mannosyl-oligosaccharide 1,2-alpha-mannosidase IB
ACSL4	30.469	29.7923	29.2108	0	323.31	136000000000	296	O60488;O60488-2;D6RF95;H0Y9A0;D6RD96;D6RFW9;D6RDA8	O60488;O60488-2	Long-chain-fatty-acid--CoA ligase 4
SNX3	27.2708	27.4007	26.6963	0	36.271	5966700000	38	O60493;O60493-2;O60493-3;O60493-4	O60493;O60493-2;O60493-3;O60493-4	Sorting nexin-3
MGEA5	20.3221	21.0631	19.0346	0	12.605	204490000	7	O60502;O60502-4;O60502-2;O60502-3;H7C3X0	O60502;O60502-4;O60502-2;O60502-3	Protein O-GlcNAcase
ADCY9	21.775	21.4753	20.466	0	16.371	743510000	16	O60503;I3NI20;I3L342	O60503	Adenylate cyclase type 9
SORBS3	23.4174	22.6169	21.8333	0	24.788	983640000	12	O60504;O60504-2;H0YAZ3;E5RHI2;H0YBA2;H0YB51;E5RJP2;E5RIA0;E5RH58;H0YAT3;E7EQH0	O60504;O60504-2;H0YAZ3;E5RHI2;H0YBA2;H0YB51	Vinexin
SYNCRIP	28.6102	28.5248	27.5985	0	323.31	41004000000	174	O60506;O60506-2;F6UXX1	O60506;O60506-2	Heterogeneous nuclear ribonucleoprotein Q
SYNCRIP	23.0525	23.0035	22.3094	0.0031832	2.6702	806950000	4	O60506-3;O60506-4;O60506-5;H0YAA0	O60506-3;O60506-4;O60506-5	Heterogeneous nuclear ribonucleoprotein Q
TPST1	23.7265	23.071	21.7268	0	19.629	615370000	22	O60507;C9J3I4	O60507	Protein-tyrosine sulfotransferase 1
CDC40	24.177	23.9574	22.6805	0	31.328	1847600000	30	O60508;Q5SRN1;Q5SRM9	O60508;Q5SRN1	Pre-mRNA-processing factor 17
B4GALT3	19.9668	18.2003	21.0857	0	5.6195	98508000	4	O60512	O60512	Beta-1,4-galactosyltransferase 3;N-acetyllactosamine synthase;Beta-N-acetylglucosaminylglycopeptide beta-1,4-galactosyltransferase;Beta-N-acetylglucosaminyl-glycolipid beta-1,4-galactosyltransferase
RANBP6	20.3367	20.2202	16.9704	0	16.797	159320000	6	O60518	O60518	Ran-binding protein 6
NEMF	23.1117	23.0703	21.0733	0	36.985	1205500000	21	O60524;O60524-4;O60524-5;O60524-3;G3V5V3;G3V4D9;G3V547;O60524-2	O60524;O60524-4;O60524-5;O60524-3;G3V5V3	Nuclear export mediator factor NEMF
GMDS	24.9836	24.2204	25.183	0	43.702	2883400000	33	O60547;O60547-2	O60547;O60547-2	GDP-mannose 4,6 dehydratase
NMT2	20.0301	19.2304	19.9093	0	5.834	96084000	3	O60551;Q5VUC6;Q5VUC7	O60551;Q5VUC6;Q5VUC7	Glycylpeptide N-tetradecanoyltransferase 2;Glycylpeptide N-tetradecanoyltransferase
CCNT1	22.5529	21.4764	20.444	0	18.125	369600000	8	O60563	O60563	Cyclin-T1
BUB1B	20.2638	20.0227	18.6453	0	19.105	219850000	11	O60566;O60566-3;O60566-2;H0YMK5	O60566;O60566-3;O60566-2	Mitotic checkpoint serine/threonine-protein kinase BUB1 beta
PLOD3	26.9668	26.1641	25.7723	0	121.82	14744000000	110	O60568;H7C2V1;H7C2S8;H7C0B8;H7C2A8;C9JU11	O60568;H7C2V1	Procollagen-lysine,2-oxoglutarate 5-dioxygenase 3
EIF4E2	24.2966	24.3086	23.4022	0	13.775	896230000	13	O60573;B9A044;B8ZZ50;O60573-2;B8ZZL3;C9JEL3;B4E1E4;B9A023	O60573;B9A044;B8ZZ50;O60573-2;B8ZZL3;C9JEL3	Eukaryotic translation initiation factor 4E type 2
2015-09-01	22.9198	23.7112	21.938	0	11.562	231180000	5	O60613	O60613	15 kDa selenoprotein
EXOC3	21.9293	21.9968	20.9447	0	17.4	517560000	11	O60645;O60645-2;O60645-3;D6RB59;H0Y995;D6RBR9	O60645;O60645-2;O60645-3;D6RB59	Exocyst complex component 3
PLIN3	26.9348	27.0895	26.363	0	120.91	11735000000	69	O60664;O60664-4;O60664-3;K7ERZ3;K7EL96;O60664-2;K7ER39;K7EJD0	O60664;O60664-4;O60664-3;K7ERZ3	Perilipin-3
SLC16A7	24.6695	24.8325	23.7677	0	13.318	1339200000	12	O60669;F8W0N3;F8W0U4;F8VXG4;F8VYZ2;F8VVU7;F8VQS4;F8VS95;F8W1M4	O60669;F8W0N3	Monocarboxylate transporter 2
RAD1	22.1664	23.8337	22.2146	0	24.607	555150000	12	O60671;O60671-2;D6R9A1;O60671-3	O60671;O60671-2	Cell cycle checkpoint protein RAD1
PRMT3	21.3574	24.4544	23.0973	0	9.5576	1121800000	6	O60678;O60678-2	O60678;O60678-2	Protein arginine N-methyltransferase 3
KPNA6	24.3099	24.3908	23.3189	0	42.346	1466700000	23	O60684;Q5TFJ7;S4R3E5	O60684	Importin subunit alpha-7
UGDH	28.8305	29.0825	27.8599	0	323.31	44783000000	175	O60701;O60701-3;O60701-2;E7ETF4;E7EV97;E7ER83;E7ER95;D6RHF4;E9PBD2	O60701;O60701-3;O60701-2	UDP-glucose 6-dehydrogenase
TPST2	21.0855	18.154	18.9872	0.0011509	3.1797	61130000	3	O60704;B1AHJ7;B1AHJ6	O60704;B1AHJ7;B1AHJ6	Protein-tyrosine sulfotransferase 2
CTNND1	27.1306	26.6498	25.7077	0	291.23	20156000000	172	O60716-3;O60716-5;O60716;C9JZR2;O60716-2;O60716-8;O60716-7;O60716-4;O60716-6;O60716-13;O60716-11;O60716-10;O60716-9;O60716-21;O60716-19;O60716-16;O60716-18;O60716-15;O60716-17;O60716-14;O60716-12;O60716-24;O60716-23;O60716-22;O60716-20;O60716-29;O60716-27;O60716-26;O60716-25;O60716-32;O60716-31;O60716-30;O60716-28;E9PRE2;H0YC95;E9PKY0;E9PKL1	O60716-3;O60716-5;O60716;C9JZR2;O60716-2;O60716-8;O60716-7;O60716-4;O60716-6;O60716-13;O60716-11;O60716-10;O60716-9;O60716-21;O60716-19;O60716-16;O60716-18;O60716-15;O60716-17;O60716-14;O60716-12;O60716-24;O60716-23;O60716-22;O60716-20;O60716-29;O60716-27;O60716-26;O60716-25;O60716-32;O60716-31;O60716-30;O60716-28	Catenin delta-1
ICMT	25.8602	23.8675	23.4397	0	8.7134	887800000	9	O60725	O60725	Protein-S-isoprenylcysteine O-methyltransferase
EIF1B	19.2606	24.2389	22.0314	0	60.197	120420000	3	O60739	O60739	Eukaryotic translation initiation factor 1b
SNX2	26.463	26.8783	25.5857	0	103.66	9449000000	79	O60749;O60749-2;D6RC15	O60749;O60749-2	Sorting nexin-2
USO1	26.9753	26.813	25.6673	0	180.35	16031000000	122	O60763;O60763-2;F5H4X1;H0Y7C0;REV__R4GMN2;REV__Q5VZ89-5;REV__Q5VZ89-6;REV__Q5VZ89;REV__R4GNB2;REV__R4GN35	O60763;O60763-2;F5H4X1;H0Y7C0	General vesicular transport factor p115
SLC19A2	23.063	21.193	19.9535	0	7.9157	180800000	6	O60779	O60779	Thiamine transporter 1
MRPS14	23.888	23.7918	25.4257	0	12.918	554950000	8	O60783	O60783	28S ribosomal protein S14, mitochondrial
TOM1	26.0582	26.2068	25.3157	0	93.254	4423000000	52	O60784;O60784-2;O60784-4;O60784-3;B0QY01;B3KUU1;V9GYF4;B0QY02;V9GZ68;H7BYN7;F8WB30;F8WAW7;F8WE29;F8WBB0	O60784;O60784-2;O60784-4;O60784-3;B0QY01;B3KUU1	Target of Myb protein 1
CCDC22	23.2977	23.6727	21.8864	0	32.28	1214000000	22	O60826	O60826	Coiled-coil domain-containing protein 22
PQBP1	27.2882	26.1924	25.0159	0	17.639	3416800000	14	O60828;O60828-5;O60828-2;O60828-4;H7C053;O60828-3;C9JQA1;O60828-10;O60828-9;O60828-8;O60828-7;O60828-6	O60828;O60828-5;O60828-2;O60828-4;H7C053	Polyglutamine-binding protein 1
TIMM17B	24.9514	23.8027	23.6322	0	20.602	795370000	12	O60830;O60830-2;V9GYS0;V9GYU0;V9GYK7	O60830;O60830-2;V9GYS0;V9GYU0	Mitochondrial import inner membrane translocase subunit Tim17-B
DKC1	27.8477	26.7997	26.2017	0	201.84	16961000000	84	O60832;O60832-2;C9IYT0;H7C0M1;H7C2Q9;H7C2Q2;H7BZF2	O60832;O60832-2;C9IYT0	H/ACA ribonucleoprotein complex subunit 4
EIF5B	25.4173	25.9091	24.924	0	285.97	9133800000	105	O60841	O60841	Eukaryotic translation initiation factor 5B
EDF1	28.1339	27.3371	26.8787	0	41.224	6874900000	35	O60869;O60869-2;O60869-3	O60869;O60869-2;O60869-3	Endothelial differentiation-related factor 1
KIN	23.1793	22.5592	22.1057	0	14.722	600690000	14	O60870;O60870-2;S4R357	O60870;O60870-2	DNA/RNA-binding protein KIN17
DNAJA2	26.8873	27.3111	26.2504	0	159.35	10771000000	74	O60884;I3L320	O60884	DnaJ homolog subfamily A member 2
BRD4	23.8699	24.1437	22.8252	0	33.688	2672900000	31	O60885;O60885-2;O60885-3;M0QZD9;M0QYW0;M0R0H4	O60885;O60885-2;O60885-3;M0QZD9	Bromodomain-containing protein 4
TBL1X;TBL1Y	21.6239	20.5494	21.7603	0	46.846	240290000	6	O60907-2;O60907;Q9BQ87;C9JCW3;C9JYQ8	O60907-2;O60907;Q9BQ87	F-box-like/WD repeat-containing protein TBL1X;F-box-like/WD repeat-containing protein TBL1Y
CTSV	20.5049	21.0705	19.2772	0	7.3041	77860000	6	O60911;P43235;Q5QP40;Q5NE16	O60911	Cathepsin L2
HUS1	23.0676	23.0916	21.8243	0	6.4833	356020000	7	O60921;O60921-2;H7C272;C9JA95;F8WAW9;C9JCK8	O60921;O60921-2;H7C272;C9JA95;F8WAW9;C9JCK8	Checkpoint protein HUS1
NBN	23.1724	23.0598	22.5141	0	49.017	1374300000	28	O60934;E5RGU1;E2QRP0;E5RGR7;E5RGN7	O60934	Nibrin
RNGTT	23.8759	23.5938	21.9524	0	43.597	1085400000	19	O60942;Q5TCW7;O60942-4;B4DSJ8;O60942-2;O60942-3	O60942;Q5TCW7;O60942-4;B4DSJ8;O60942-2;O60942-3	mRNA-capping enzyme;Polynucleotide 5-triphosphatase;mRNA guanylyltransferase
ABCB7	24.6239	23.6977	22.6599	0	53.328	1855900000	32	O75027;O75027-2;B4DGL8;O75027-3;E9PJR8;E9PNQ5	O75027;O75027-2;B4DGL8;O75027-3	ATP-binding cassette sub-family B member 7, mitochondrial
IGSF3	20.2573	20.7674	20.1499	0	14.573	350320000	12	O75054;O75054-2	O75054;O75054-2	Immunoglobulin superfamily member 3
EFCAB14	21.5548	20.594	19.4511	0	12.765	196280000	6	O75071	O75071	EF-hand calcium-binding domain-containing protein 14
WDR1	27.9235	28.0539	27.3241	0	183.12	27427000000	104	O75083;O75083-3;D6RD66	O75083;O75083-3;D6RD66	WD repeat-containing protein 1
ATP9A	22.8029	21.624	19.2869	0	24.406	755730000	10	O75110;O75110-2;O43861;O43861-2	O75110;O75110-2	Probable phospholipid-transporting ATPase IIA
ROCK2	22.5727	23.3597	21.6806	0	59.23	1952200000	35	O75116;E9PF63;D6REE7	O75116;E9PF63	Rho-associated protein kinase 2
COBL	21.6204	20.9105	18.4378	0	32.422	487440000	12	O75128;O75128-2;O75128-3;O75128-7;H7C1N2;J3KR05;O75128-6;O75128-5;O75128-4;C9J9X1;H7C2C4	O75128;O75128-2;O75128-3;O75128-7;H7C1N2;J3KR05;O75128-6	Protein cordon-bleu
CPNE3	25.5467	25.4774	23.7764	0	36.808	3557000000	35	O75131;H0YB26;E5RHZ0;E5RFT7	O75131	Copine-3
HIP1R	22.3612	22.4784	21.389	0	76.57	1121800000	29	O75146;O75146-2;H0YH66	O75146	Huntingtin-interacting protein 1-related protein
RNF40	24.5914	24.6095	22.9221	0	76.755	3852600000	49	O75150;H3BP71;O75150-4;O75150-3;H3BS50;H3BQ99;H3BUL6;I3L332	O75150;H3BP71;O75150-4;O75150-3	E3 ubiquitin-protein ligase BRE1B
PHF2	22.3567	21.8895	21.1122	0.00017771	4.6701	719030000	9	O75151;E7ET14;H0Y589;Q9UPP1-5	O75151	Lysine-specific demethylase PHF2
ZC3H11A	24.1972	23.9741	23.1363	0	80.046	2348700000	38	O75152;E9PQ61;E9PBY7	O75152;E9PQ61;E9PBY7	Zinc finger CCCH domain-containing protein 11A
KDM4A	19.3866	19.8095	17.6804	0.0024116	2.8348	82967000	1	O75164;O75164-2	O75164;O75164-2	Lysine-specific demethylase 4A
DNAJC13	24.0062	23.7055	22.5812	0	183.58	5251400000	97	O75165;H0Y8Q2;H0YA63	O75165	DnaJ homolog subfamily C member 13
PPP6R2	24.1479	24.2463	23.0125	0	58.434	2737700000	45	O75170;O75170-2;O75170-6;O75170-4;O75170-3;O75170-5;T1ECW5	O75170;O75170-2;O75170-6;O75170-4;O75170-3;O75170-5;T1ECW5	Serine/threonine-protein phosphatase 6 regulatory subunit 2
CNOT3	25.1692	25.1642	23.9482	0	21.891	2198000000	28	O75175;O75175-2;O75175-3;H0Y5X7;H7C148;H7C5J4;H7C3F5	O75175;O75175-2;O75175-3	CCR4-NOT transcription complex subunit 3
SS18L1	24.4516	18.0402	16.49	0	5.8338	210750000	5	O75177;O75177-2	O75177;O75177-2	Calcium-responsive transactivator
SIN3B	21.1025	20.8348	18.5993	0	20.099	332710000	12	O75182;O75182-2;M0QYC5;O75182-3;M0R271	O75182;O75182-2;M0QYC5	Paired amphipathic helix protein Sin3b
DNAJB6	23.8816	23.0388	21.8836	0	20.304	454970000	10	O75190;E9PH18;O75190-4;O75190-2;C9JDR7;C9JDX6;F8WCZ4;C9J2P2;C9J2C4;C9JN01;C9JB42	O75190;E9PH18;O75190-4;O75190-2;C9JDR7;C9JDX6;F8WCZ4;C9J2P2;C9J2C4	DnaJ homolog subfamily B member 6
XYLB	25.7948	24.9566	23.823	0	40.892	3084600000	32	O75191;O75191-2	O75191;O75191-2	Xylulose kinase
LRP5	20.2637	19.5386	17.9985	0	13.856	269010000	10	O75197;E9PHY1;A4QPB2-2;A4QPB2	O75197	Low-density lipoprotein receptor-related protein 5
COQ9	22.7426	21.6229	19.2314	0	7.2712	152350000	5	O75208;H3BPY0;H3BNT2;H3BRC0;H3BSJ5	O75208;H3BPY0;H3BNT2	Ubiquinone biosynthesis protein COQ9, mitochondrial
GGCT	25.1687	24.5934	23.6484	0	17.727	1281600000	15	O75223;M0QZK8;B8ZZK2;O75223-3;H7BZK5;O75223-2;O75223-4	O75223;M0QZK8;B8ZZK2;O75223-3	Gamma-glutamylcyclotransferase
NDUFS7	25.546	24.3134	24.2743	0	10.171	1232800000	13	O75251	O75251	NADH dehydrogenase [ubiquinone] iron-sulfur protein 7, mitochondrial
NDUFS2	26.8912	26.2565	25.7398	0	115.51	8974600000	82	O75306;O75306-2	O75306;O75306-2	NADH dehydrogenase [ubiquinone] iron-sulfur protein 2, mitochondrial
UGT2B11;UGT2B10;UGT2B28	23.2542	22.6134	21.0327	0	9.6724	488920000	11	O75310;P36537-2;P36537;Q9BY64;Q9BY64-2	O75310;P36537-2;P36537;Q9BY64	UDP-glucuronosyltransferase 2B11;UDP-glucuronosyltransferase 2B10;UDP-glucuronosyltransferase 2B28
DUSP11	21.6049	21.5279	20.4582	0	8.102	207720000	4	O75319;H7C0E6;C9JYA6;O75319-2	O75319;H7C0E6;C9JYA6;O75319-2	RNA/RNP complex-1-interacting phosphatase
GBAS	21.8273	22.645	20.2683	0.00018064	5.0533	268210000	6	O75323;H7C333;O75323-2;C9J7B1;C9K068	O75323;H7C333;O75323-2	Protein NipSnap homolog 2
HMMR	20.273	21.2483	19.7937	0	10.109	288480000	7	O75330;O75330-4;O75330-2;O75330-3;E5RIH2;E5RI30	O75330;O75330-4;O75330-2;O75330-3	Hyaluronan mediated motility receptor
PDCD6	24.6074	25.2552	24.5145	0	31.869	1062000000	14	O75340;O75340-2;H0Y9X3;D6RA21;Q86W51;E7EPW6;O75340-3	O75340;O75340-2	Programmed cell death protein 6
ATP6V1G1	26.7744	25.9138	25.5294	0	72.353	1927400000	16	O75348;O95670;F2Z307;O95670-2	O75348	V-type proton ATPase subunit G 1
VPS4B	24.9916	24.7644	23.8106	0	18.174	2360900000	28	O75351	O75351	Vacuolar protein sorting-associated protein 4B
ENTPD5	27.1058	26.646	24.9214	0	56.153	7647900000	42	O75356;G3V4I0;G3V450;H0YJH1;G3V3Y0;REV__Q8N2N9-4;REV__E9PJI0;REV__Q5VUR7;REV__Q5TYW2;REV__Q5SQ80;REV__Q5CZ79;REV__Q4UJ75;REV__Q5JPF3	O75356;G3V4I0;G3V450	Ectonucleoside triphosphate diphosphohydrolase 5
ZNF217	21.5711	18.6412	16.6164	0	6.9962	242920000	5	O75362;O15090;Q9BZ31;K7EKT4	O75362	Zinc finger protein 217
H2AFY	29.058	28.7367	28.0158	0	198.35	30636000000	112	O75367;O75367-3;O75367-2;B4DJC3;D6RCF2;Q9P0M6;Q5SQT3	O75367;O75367-3;O75367-2;B4DJC3	Core histone macro-H2A.1;Histone H2A
FLNB	28.4751	28.4086	27.1128	0	323.31	176000000000	729	O75369-8;O75369;O75369-2;O75369-9;O75369-6;O75369-3;E7EN95;O75369-7;O75369-5;O75369-4;H7C5L4;Q8WXT3	O75369-8;O75369;O75369-2;O75369-9;O75369-6;O75369-3;E7EN95;O75369-7;O75369-5;O75369-4	Filamin-B
NCOR1	23.5203	22.8097	22.0619	0	97.294	3867200000	66	O75376;O75376-2;E7EVK1;B4DJ25;E7EVU5;E7EW50;J3KS51;C9JAP0;J3KT44;J3KRE4;O75376-3;J3QKP0	O75376;O75376-2	Nuclear receptor corepressor 1
NDUFS6	24.0737	23.5687	22.7517	0	29.099	458270000	14	O75380;D6RBT3	O75380;D6RBT3	NADH dehydrogenase [ubiquinone] iron-sulfur protein 6, mitochondrial
PEX14	25.997	24.8302	22.9151	0	175.4	1885100000	38	O75381;O75381-2;K7EK59	O75381;O75381-2	Peroxisomal membrane protein PEX14
ULK1	19.1661	17.4347	17.5105	0.0098935	1.9828	13941000	2	O75385	O75385	Serine/threonine-protein kinase ULK1
SLC43A1	24.414	23.7252	22.6643	0	59.882	902040000	17	O75387;O75387-2;E9PJ68	O75387;O75387-2;E9PJ68	Large neutral amino acids transporter small subunit 3
SPAG7	24.7537	24.6417	21.716	0	25.853	817820000	16	O75391;I3L0X5;I3L4C3;I3L0Q5	O75391;I3L0X5;I3L4C3	Sperm-associated antigen 7
MRPL33	26.6769	25.4617	23.2491	0	7.0935	633480000	6	O75394	O75394	39S ribosomal protein L33, mitochondrial
SEC22B	27.0571	27.2874	27.0448	0	61.863	6583300000	47	O75396	O75396	Vesicle-trafficking protein SEC22b
PRPF40A	26.255	26.0374	25.3325	0	46.196	8595100000	54	O75400;O75400-2;F5H578;H7C2N3	O75400;O75400-2	Pre-mRNA-processing factor 40 homolog A
PRPF40A	17.8563	18.8728	18.8241	0.0037939	2.553	41099000	1	O75400-3;H0YG38	O75400-3	Pre-mRNA-processing factor 40 homolog A
TACC1	25.161	24.7231	24.0051	0	80.927	4555300000	60	O75410;O75410-7;O75410-2;E7EVI4;E7ET87;O75410-3;H0YAY0;R4GMT7;E5RFM9;O75410-5;O75410-4;O75410-6;B4E3H6;H0YBT8;O75410-8;E5RJU4;E5RIP3;E5RJG6	O75410;O75410-7;O75410-2;E7EVI4;E7ET87;O75410-3;H0YAY0;R4GMT7;E5RFM9;O75410-5;O75410-4;O75410-6	Transforming acidic coiled-coil-containing protein 1
CDC45	21.8805	22.5353	21.8995	0	17.879	501420000	16	O75419;O75419-2;O75419-3;H7BZ91;C9K087;C9J911	O75419;O75419-2;O75419-3	Cell division control protein 45 homolog
GIGYF1	19.109	20.3178	17.4707	0.00067069	3.5138	94863000	2	O75420	O75420	PERQ amino acid-rich with GYF domain-containing protein 1
LRCH4	21.9073	21.3399	20.3379	0	9.8946	380570000	11	O75427;H7C5D9;C9JYK0	O75427	Leucine-rich repeat and calponin homology domain-containing protein 4
MTX2	26.766	26.8368	26.1294	0	72.237	3622700000	26	O75431;O75431-2;C9JNK6;C9JAZ1;F8WE26	O75431;O75431-2;C9JNK6;C9JAZ1	Metaxin-2
VPS26A	26.2816	26.2845	25.495	0	69.927	4654300000	36	O75436;S4R3Q6;O75436-2;S4R2Y3	O75436;S4R3Q6;O75436-2	Vacuolar protein sorting-associated protein 26A
PMPCB	26.7874	26.5111	25.2512	0	223.95	8382900000	69	O75439;G3V0E4;F8WAZ6;F8WEA6;F8WBE1	O75439;G3V0E4	Mitochondrial-processing peptidase subunit beta
SAP30	23.8493	23.9197	23.4783	0	5.4725	512490000	5	O75446	O75446	Histone deacetylase complex subunit SAP30
KATNA1	23.6787	23.5391	22.9624	0	8.833	1459900000	13	O75449;B7ZBC9;B7ZBC8;O75449-2;Q9BW62	O75449	Katanin p60 ATPase-containing subunit A1
PSIP1	27.8589	27.2698	25.7444	0	82.74	16502000000	95	O75475;O75475-2;O75475-3;H3BPQ6	O75475;O75475-2;O75475-3	PC4 and SFRS1-interacting protein
ERLIN1	27.8104	26.8946	26.3058	0	69.709	10463000000	56	O75477;B0QZ43	O75477;B0QZ43	Erlin-1
NDUFS3	27.1707	26.6699	25.8892	0	89.35	6310200000	57	O75489;E9PS48;B4DFM8;G3V194;E9PKL8;E9PJE7	O75489	NADH dehydrogenase [ubiquinone] iron-sulfur protein 3, mitochondrial
SRSF10;FUSIP1	28.6553	28.4352	26.2914	0	55.467	9497900000	36	O75494;O75494-3;O75494-4;Q5JRI1;O75494-5;O75494-6;O75494-2;Q6IQ42;Q8WXF0;R4GMP8	O75494;O75494-3;O75494-4;Q5JRI1;O75494-5;O75494-6;O75494-2;Q6IQ42	Serine/arginine-rich splicing factor 10
CLN5	24.1661	22.5957	21.7668	0	6.8104	716860000	8	O75503	O75503	Ceroid-lipofuscinosis neuronal protein 5
TNFRSF21	20.8707	20.0716	19.9934	0	8.7275	242780000	8	O75509	O75509	Tumor necrosis factor receptor superfamily member 21
ECI2	26.2992	25.6604	24.2524	0	86.434	3636200000	44	O75521;O75521-2;F1LLU7;F8WAW4;C9JB63;F8W6J1	O75521;O75521-2;F1LLU7;F8WAW4;C9JB63	Enoyl-CoA delta isomerase 2, mitochondrial
KHDRBS3	21.204	20.7118	18.0691	0.0031807	2.6617	49596000	1	O75525;O75525-2;E5RG12;H0YAQ1;H0YAQ3;E5RJZ9	O75525;O75525-2	KH domain-containing, RNA-binding, signal transduction-associated protein 3
TADA3	20.0473	20.3102	21.7808	0	7.5987	174570000	3	O75528;O75528-2	O75528;O75528-2	Transcriptional adapter 3
EED	22.9359	22.8565	21.9563	0	14.273	618810000	12	O75530;O75530-2;O75530-3;E9PJK2	O75530;O75530-2;O75530-3;E9PJK2	Polycomb protein EED
BANF1	26.847	27.3145	26.7753	0	29.63	2541600000	18	O75531;E9PJJ8	O75531	Barrier-to-autointegration factor;Barrier-to-autointegration factor, N-terminally processed
SF3B1	28.3284	27.8235	26.9489	0	323.31	55104000000	293	O75533;H7C341;B4DGZ4;O75533-2;F8WC19	O75533	Splicing factor 3B subunit 1
CSDE1	20.5313	19.7273	16.6321	0.0003502	4.3493	0	1	O75534;O75534-4;E9PLD4;E9PKN4	O75534;O75534-4	Cold shock domain-containing protein E1
CSDE1	26.7523	26.8265	25.8364	0	213.77	16811000000	127	O75534-2;O75534-3;E9PLT0;E9PNG3;E9PJK7	O75534-2;O75534-3;E9PLT0	Cold shock domain-containing protein E1
WBP4	23.0989	22.6908	19.6329	0	7.1153	270700000	6	O75554;O75554-2	O75554;O75554-2	WW domain-binding protein 4
PRKRA	26.2768	26.1441	25.5031	0	101.17	3703100000	32	O75569;O75569-3;O75569-2;G5E9Q4;F8WEG8;C9JMM3	O75569;O75569-3;O75569-2;G5E9Q4	Interferon-inducible double-stranded RNA-dependent protein kinase activator A
MYCBP2	20.4855	20.3951	19.0663	0	70.519	1019800000	37	O75592;O75592-2;H7C3U4	O75592;O75592-2	E3 ubiquitin-protein ligase MYCBP2
GCAT	23.7106	22.8681	22.5825	0	14.369	574380000	13	O75600;O75600-2;H7BZ75;F2Z340;C9IZC9	O75600;O75600-2	2-amino-3-ketobutyrate coenzyme A ligase, mitochondrial
NPM3	27.5168	26.413	25.8065	0	225.44	3425500000	11	O75607	O75607	Nucleoplasmin-3
ERAL1	24.2244	23.2009	23.0921	0	22.738	1105800000	20	O75616;J3QSB2;J3QRV9;O75616-2;K7EQJ8;J3QT61	O75616;J3QSB2;J3QRV9;O75616-2	GTPase Era, mitochondrial
SNRNP200	27.8862	27.3227	26.518	0	323.31	74536000000	400	O75643;O75643-2;B4E0P5	O75643	U5 small nuclear ribonucleoprotein 200 kDa helicase
TRMU	19.2603	18.3597	17.3324	0.00051361	3.9103	33672000	3	O75648;O75648-2;O75648-3;O75648-5;O75648-4	O75648;O75648-2;O75648-3;O75648-5;O75648-4	Mitochondrial tRNA-specific 2-thiouridylase 1
TIPRL	25.7556	25.9818	25.0246	0	61.271	3012900000	23	O75663;O75663-2	O75663;O75663-2	TIP41-like protein
SURF6	24.6305	24.2676	22.8451	0	10.798	1085300000	11	O75683	O75683	Surfeit locus protein 6
PPM1B	20.6735	22.2523	19.7627	0	9.418	239550000	7	O75688;O75688-2;B8ZZF0;C9JIR6;O75688-4;O75688-5;O75688-3	O75688;O75688-2;B8ZZF0;C9JIR6;O75688-4;O75688-5	Protein phosphatase 1B
UTP20	24.0503	23.4486	22.3808	0	185.5	5938200000	107	O75691	O75691	Small subunit processome component 20 homolog
NUP155	26.38	25.8297	25.0927	0	253.19	13265000000	154	O75694;E9PF10;O75694-2;D6RA13	O75694;E9PF10;O75694-2	Nuclear pore complex protein Nup155
RP2	25.3317	24.7132	23.8972	0	7.4232	1885100000	14	O75695	O75695	Protein XRP2
WDHD1	21.7968	22.5562	21.9445	0	45.991	1055000000	22	O75717;O75717-2;C9JYB3	O75717;O75717-2	WD repeat and HMG-box DNA-binding protein 1
TCEA3	24.9025	25.1651	23.6347	0	29.056	1976700000	27	O75764;S4R3M9;Q5DR83;S4R419	O75764	Transcription elongation factor A protein 3
PALM	23.8977	23.0838	22.1201	0	79.271	975460000	24	O75781;O75781-2	O75781;O75781-2	Paralemmin-1
ATP6AP2	24.194	22.5958	21.7111	0	29.658	512290000	15	O75787;H0Y750;H7C3E1;H7C240	O75787;H0Y750;H7C3E1	Renin receptor
RNASEH2A	23.6645	23.4434	22.2394	0	12.335	510280000	8	O75792	O75792	Ribonuclease H2 subunit A
CDC123	21.4543	22.3297	22.0677	0	9.6591	245170000	4	O75794;X6RA30;X6RKY7;X6RF82	O75794;X6RA30;X6RKY7;X6RF82	Cell division cycle protein 123 homolog
UGT2B17;UGT2B15	21.5808	20.9653	18.6244	0.0024093	2.8154	141040000	3	O75795;P54855;D6RFW5;S4R3I0;Q9Y4X1-3;Q9Y4X1-5;Q9Y4X1-4	O75795;P54855	UDP-glucuronosyltransferase 2B17;UDP-glucuronosyltransferase 2B15
RPP40	22.5959	22.1363	21.7428	0	27.675	382750000	9	O75818;O75818-2;F8WC38;X6RLL4	O75818;O75818-2;F8WC38;X6RLL4	Ribonuclease P protein subunit p40
EIF3G	27.0806	27.5364	27.0268	0	164.65	11608000000	66	O75821;K7EL20;K7ENA8;K7ER90;K7EL60;K7EP16;K7ENH0	O75821;K7EL20;K7ENA8;K7ER90	Eukaryotic translation initiation factor 3 subunit G
EIF3J	26.9825	27.0806	26.5469	0	76.734	6356400000	42	O75822;O75822-2;O75822-3;H0YGJ7;H0YLP3	O75822;O75822-2;O75822-3	Eukaryotic translation initiation factor 3 subunit J
PSMD10	24.357	25.0446	23.839	0	16.168	873280000	16	O75832;B1AJY5;B1AJY7;O75832-2;B1AJY6	O75832;B1AJY5;B1AJY7;O75832-2	26S proteasome non-ATPase regulatory subunit 10
AP1G2	18.334	17.7951	15.9765	0	7.0597	34271000	3	O75843;G3V2V9;G3V3Z2;G3V532	O75843	AP-1 complex subunit gamma-like 2
ZMPSTE24	27.3787	26.6134	26.2215	0	65.177	8280300000	61	O75844	O75844	CAAX prenyl protease 1 homolog
PPP1R37	19.0828	19.8642	19.3515	0.00034771	4.2164	84132000	4	O75864;F5H3P7	O75864;F5H3P7	Protein phosphatase 1 regulatory subunit 37
IDH1	29.8401	30.1832	29.471	0	204.4	91622000000	163	O75874;C9J4N6;C9JLU6;C9JJE5	O75874	Isocitrate dehydrogenase [NADP] cytoplasmic
GATB;PET112	23.9862	24.0395	23.1141	0	92.315	1631700000	26	O75879;D6REA0;D6RDU9;H0Y8G7;H0Y9F2;B4E0P2	O75879;D6REA0;D6RDU9	Glutamyl-tRNA(Gln) amidotransferase subunit B, mitochondrial
SCO1	25.9521	25.0726	24.1164	0	62.031	2472400000	15	O75880;J3QL56	O75880;J3QL56	Protein SCO1 homolog, mitochondrial
ATRN	23.0013	22.4828	21.2503	0	57.995	1559300000	30	O75882;O75882-3;O75882-2	O75882;O75882-3;O75882-2	Attractin
STAM2	22.8421	23.764	21.4767	0	20.396	764790000	12	O75886;O75886-2	O75886;O75886-2	Signal transducing adapter molecule 2
TUSC2	24.4641	24.42	17.7336	0	6.4903	273540000	4	O75896;G3V0I0;F2Z2A9	O75896	Tumor suppressor candidate 2
CCNK	23.2754	24.17	22.9636	0	63.786	974600000	18	O75909;O75909-4;O75909-1;G3V5E1;G3V2Q3;O75909-2;G3V235	O75909;O75909-4;O75909-1;G3V5E1;G3V2Q3;O75909-2	Cyclin-K
DHRS3	23.8333	23.4319	22.9191	0	15.796	524370000	13	O75911;Q5SUY4;O75911-2	O75911;Q5SUY4	Short-chain dehydrogenase/reductase 3
ARL6IP5	19.4007	22.6594	22.3385	0	6.1985	79176000	2	O75915	O75915	PRA1 family protein 3
PIAS1	22.2626	21.7021	20.9861	0	25.481	333290000	17	O75925;O75925-2;H3BSI8;B4DGW0	O75925;O75925-2	E3 SUMO-protein ligase PIAS1
PIAS2	19.6014	18.7242	17.5886	0.0025596	2.7477	36855000	2	O75928;O75928-3;O75928-2	O75928;O75928-3;O75928-2	E3 SUMO-protein ligase PIAS2
BCAS2	26.2781	26.1838	25.2462	0	51.668	2773200000	34	O75934	O75934	Pre-mRNA-splicing factor SPF27
DNAJC8	28.1953	28.1997	27.1548	0	88.031	12580000000	63	O75937;S4R3J5	O75937	DnaJ homolog subfamily C member 8
SMNDC1	26.4675	25.8356	24.7977	0	59.327	1925400000	24	O75940	O75940	Survival of motor neuron-related-splicing factor 30
RAD17	19.2247	20.0441	17.2506	0	5.903	53533000	4	O75943;O75943-4;O75943-2;O75943-3;H0Y9J8;D6RAW6	O75943;O75943-4;O75943-2;O75943-3	Cell cycle checkpoint protein RAD17
ATP5H	26.6787	26.2392	26.367	0	23.237	3048300000	22	O75947;O75947-2;F5H608	O75947;O75947-2	ATP synthase subunit d, mitochondrial
FLOT1	27.5597	27.1665	26.1141	0	213.64	14997000000	111	O75955;O75955-2;A2AB10;A2AB09;A2AB12;A2AB13;A2AB11;A2ABJ5	O75955;O75955-2;A2AB10;A2AB09;A2AB12	Flotillin-1
CPD	27.1372	26.6576	25.4334	0	297.87	26782000000	186	O75976;O75976-2;J3QQJ4;J3QRJ9	O75976;O75976-2	Carboxypeptidase D
GLRX3	27.8572	28.2089	27.0584	0	155.34	14424000000	63	O76003	O76003	Glutaredoxin-3
RSL1D1	28.1919	27.597	27.2211	0	86.548	18897000000	95	O76021;J3QSV6;I3L3U9;I3L3C4;I3L234;O76021-2;J3KPU7;I3L2F2;I3L4T8;I3L1Y4;I3L1A3	O76021;J3QSV6;I3L3U9;I3L3C4	Ribosomal L1 domain-containing protein 1
WFS1	26.3716	25.3694	24.3021	0	128.09	7530400000	75	O76024;H0Y9G5	O76024	Wolframin
CLPX	26.8708	26.0971	25.5469	0	107.81	12007000000	70	O76031;H0YM48;H0YK07	O76031	ATP-dependent Clp protease ATP-binding subunit clpX-like, mitochondrial
CIAO1	23.5007	22.6433	20.6219	0	5.5461	374360000	5	O76071	O76071	Probable cytosolic iron-sulfur protein assembly protein CIAO1
ZFAND5	17.891	20.4493	18.193	0	19.935	45783000	3	O76080;Q5QPB1	O76080;Q5QPB1	AN1-type zinc finger protein 5
SLC22A5	18.9468	18.9934	17.7509	0.0060606	2.2639	0	1	O76082;O76082-2;O76082-3	O76082;O76082-2;O76082-3	Solute carrier family 22 member 5
SRP72	26.2778	26.2964	25.0768	0	222.89	8631000000	66	O76094;O76094-2;D6RDY6;R4GNC1	O76094;O76094-2;D6RDY6	Signal recognition particle subunit SRP72
JTB	22.6975	24.2618	18.2206	0	6.0844	381790000	5	O76095;O76095-2	O76095;O76095-2	Protein JTB
DDAH1	26.8831	26.859	26.2552	0	38.389	6435500000	48	O94760;B4DGT0;O94760-2	O94760;B4DGT0;O94760-2	N(G),N(G)-dimethylarginine dimethylaminohydrolase 1
RECQL4	20.5891	19.1805	19.1453	0	13.868	163220000	7	O94761;V9GYB6;V9GZ64	O94761	ATP-dependent DNA helicase Q4
URI1	22.4119	22.7285	19.4549	0	11.761	353140000	7	O94763;O94763-2;O94763-3;I3L467;I3L130	O94763;O94763-2;O94763-3	Unconventional prefoldin RPB5 interactor 1
URI1	20.3416	19.7986	18.6062	0.0025588	2.747	69164000	2	O94763-4	O94763-4	Unconventional prefoldin RPB5 interactor 1
B3GAT3	25.0885	24.2182	23.0229	0	22.289	1200600000	15	O94766;G3V150;O94766-2;E9PNA1	O94766;G3V150;O94766-2;E9PNA1	Galactosylgalactosylxylosylprotein 3-beta-glucuronosyltransferase 3
MTA2	27.8034	26.8971	26.132	0	119.72	25634000000	118	O94776;O94776-2	O94776;O94776-2	Metastasis-associated protein MTA2
USP1	20.206	18.8904	20.5648	0.00035032	4.3583	151750000	2	O94782;C9JWX4;C9JC88	O94782	Ubiquitin carboxyl-terminal hydrolase 1
ATG12	21.9665	26.3596	23.8599	0.00034843	4.2489	328930000	6	O94817	O94817	Ubiquitin-like protein ATG12
LTN1	21.4505	22.0228	19.9198	0	52.26	925860000	28	O94822;O94822-3;H7BYG8;S4R3T2;O94822-2	O94822;O94822-3;H7BYG8	E3 ubiquitin-protein ligase listerin
TOMM70A	28.0477	27.2264	26.389	0	121.85	21110000000	115	O94826	O94826	Mitochondrial import receptor subunit TOM70
IPO13	19.6737	18.8845	18.7815	0.0019417	2.9533	96695000	1	O94829	O94829	Importin-13
DDHD2	21.0358	20.6163	19.395	0	6.4964	229300000	7	O94830;H0YF30;O94830-2;E9PK57;H0YF17	O94830;H0YF30;O94830-2	Phospholipase DDHD2
MYO1D	24.2515	24.0228	23.2998	0	90.269	3810600000	79	O94832;K7EIG7;J3QRN6;J3KRL0;B0I1T2;J3QRR2;F8WEW9;B0I1T2-2;B0I1T2-3;B0I1T2-4	O94832;K7EIG7;J3QRN6	Unconventional myosin-Id
TOX4;TOX3	22.5765	22.8786	20.8723	0	57.779	418520000	12	O94842;O94842-3;O94842-2;O15405;O15405-2;O94900;Q96NM4;Q96NM4-4;Q96NM4-2;Q96NM4-3	O94842;O94842-3;O94842-2;O15405;O15405-2	TOX high mobility group box family member 4;TOX high mobility group box family member 3
MICAL2	18.9734	17.9579	16.48	0	10.177	132300000	5	O94851;O94851-5;O94851-6;O94851-4;O94851-3;O94851-2;E9PJB0;E9PRE0;E9PL42;E9PNC3;E9PKI3	O94851;O94851-5;O94851-6;O94851-4;O94851-3;O94851-2	Protein-methionine sulfoxide oxidase MICAL2
KIAA0754	18.6961	17.656	16.7789	0.0031837	2.6768	14440000	2	O94854;O94854-2	O94854;O94854-2	Uncharacterized protein KIAA0754
SEC24D	25.1643	25.4835	24.6431	0	54.13	5877500000	53	O94855;O94855-2;E9PDM8;E9PC44	O94855;O94855-2;E9PDM8;E9PC44	Protein transport protein Sec24D
UFL1	25.2452	24.4249	23.888	0	115.54	4663900000	73	O94874;O94874-2;O94874-3	O94874;O94874-2;O94874-3	E3 UFM1-protein ligase 1
PHF14	22.7082	21.9701	20.6141	0	47.218	634490000	17	O94880	O94880	PHD finger protein 14
PHF14	20.774	20.5391	20.3113	0	5.5095	199590000	4	O94880-2	O94880-2	PHD finger protein 14
TMEM63A	23.6281	21.9921	21.7656	0	12.922	799930000	15	O94886;X6RI56	O94886	CSC1-like protein 1
FARP2	17.9038	18.6866	18.1895	0.00051405	3.9228	34259000	1	O94887;O94887-3;O94887-2;C9JWM9;C9JVQ5	O94887;O94887-3;O94887-2;C9JWM9;C9JVQ5	FERM, RhoGEF and pleckstrin domain-containing protein 2
UBXN7	24.1301	23.7603	23.3287	0	71.858	1240800000	25	O94888;C9JAT7;F8WB69;C9JD50;H7BYF4	O94888;C9JAT7	UBX domain-containing protein 7
PROSC	26.573	26.4122	26.0195	0	42.342	4639000000	43	O94903;E5RFX7;E5RG77;H0YBG2;E5RFZ4	O94903	Proline synthase co-transcribed bacterial homolog protein
PRPF6	26.4323	25.898	24.8495	0	130.63	12707000000	92	O94906;O94906-2	O94906;O94906-2	Pre-mRNA-processing factor 6
PCF11	21.9622	22.1265	20.479	0	42.001	1157200000	25	O94913;E9PQ01;E9PKN0;E9PQF9	O94913;E9PQ01;E9PKN0	Pre-mRNA cleavage complex 2 protein Pcf11
FRYL	16.819	17.2926	17.6923	0.00098782	3.2029	46248000	3	O94915;H0Y9X0;F2Z2S2	O94915;H0Y9X0;F2Z2S2	Protein furry homolog-like
NFAT5	18.9544	19.464	17.4981	0.0016308	3.0523	40629000	2	O94916;O94916-2;O94916-4;O94916-5;O94916-3	O94916;O94916-2;O94916-4;O94916-5;O94916-3	Nuclear factor of activated T-cells 5
GLS	23.0229	21.9535	21.2803	0	22.082	633660000	8	O94925;H7BZD1;O94925-2;C9JIJ6;B7Z509;H7C201	O94925	Glutaminase kidney isoform, mitochondrial
GLS	27.0054	26.7019	25.1661	0	200.5	11649000000	81	O94925-3;B8ZZA8;B8ZZC5	O94925-3	Glutaminase kidney isoform, mitochondrial
HAUS5	19.963	20.5132	19.7396	0	13.291	139430000	9	O94927;K7EQ61;O94927-2	O94927	HAUS augmin-like complex subunit 5
UBOX5	20.8664	21.1001	16.4542	0	13.914	115440000	8	O94941;O94941-2	O94941;O94941-2	RING finger protein 37
SOGA1	22.3651	21.1113	21.2128	0.00051414	3.93	1038300000	3	O94964;O94964-2;X6R3R3;H0YDM2;O94964-4;Q9Y4B5;J3QL92;O94964-3;Q9Y4B5-2;Q9Y4B5-3	O94964;O94964-2;X6R3R3;H0YDM2;O94964-4	Protein SOGA1;N-terminal form;C-terminal 80 kDa form
USP19	23.1349	23.0745	21.7636	0	71.838	1772700000	37	O94966-7;O94966-6;O94966-3;O94966-4;O94966-5;O94966;E7EST9;B5MEG5;E7ESU0;O94966-2	O94966-7;O94966-6;O94966-3;O94966-4;O94966-5;O94966;E7EST9;B5MEG5;E7ESU0	Ubiquitin carboxyl-terminal hydrolase 19;Ubiquitin carboxyl-terminal hydrolase
AP2A2	24.9436	24.4924	23.3649	0	103.07	4369200000	55	O94973;O94973-2;O94973-3;E9PR62;E9PQP4;H0YDE9;H0YEG0;E9PNC4	O94973;O94973-2;O94973-3	AP-2 complex subunit alpha-2
SEC31A	28.3539	28.0714	27.3266	0	225.68	48915000000	174	O94979-8;H0Y8W8	O94979-8	Protein transport protein Sec31A
CLSTN1	19.9393	19.929	19.6135	0	16.513	143230000	6	O94985;O94985-2;Q5SR54	O94985;O94985-2;Q5SR54	Calsyntenin-1;Soluble Alc-alpha;CTF1-alpha
HEXIM1	25.0452	24.5842	22.9704	0	25.745	1065000000	17	O94992	O94992	Protein HEXIM1
UBR5	22.798	22.7984	21.5546	0	143.08	2834500000	63	O95071;O95071-2;E7EMW7;E7ET84;E5RFK7;H0YBB4;H0YAV7	O95071;O95071-2;E7EMW7	E3 ubiquitin-protein ligase UBR5
AGFG2	25.7175	24.842	24.7803	0	38.285	1848100000	22	O95081;O95081-2;H7BZA5	O95081;O95081-2	Arf-GAP domain and FG repeat-containing protein 2
PRSS23	19.8793	18.9671	18.6107	0.00067035	3.5101	49518000	3	O95084;O95084-2;E9PRR2	O95084;O95084-2	Serine protease 23
SCAF4	24.3074	24.0236	23.1005	0	33.676	1892000000	24	O95104;O95104-2;O95104-3	O95104;O95104-2;O95104-3	Splicing factor, arginine/serine-rich 15
NDUFB6	25.3612	24.8043	24.2641	0	11.521	999530000	19	O95139;O95139-2;Q7Z6M2	O95139	NADH dehydrogenase [ubiquinone] 1 beta subcomplex subunit 6
MFN2	24.6866	23.9777	23.1495	0	45.767	2666200000	33	O95140;O95140-2;Q5JXC5	O95140	Mitofusin-2
UBE4B	24.5733	24.4245	23.7248	0	85.635	4980000000	64	O95155;O95155-2;O95155-4;O95155-3;K7EP75;K7ERA7;B1AQ61	O95155;O95155-2;O95155-4;O95155-3	Ubiquitin conjugation factor E4 B
ZFPL1	24.0155	23.3049	21.3122	0	6.9092	537800000	7	O95159;E9PQA5;E9PQ47;E9PNY1;E9PMQ3;H0YCU8;E9PJX1;E9PJ47	O95159;E9PQA5;E9PQ47;E9PNY1;E9PMQ3	Zinc finger protein-like 1
IKBKAP	25.1158	25.4004	24.6013	0	195.35	8405100000	116	O95163;F5H2T0;H0YDF3	O95163;F5H2T0	Elongator complex protein 1
NDUFA3	23.9683	24.262	22.2144	0	5.3688	221010000	3	O95167;H7C0D7;S4R3I5;H7C2R1;A8MVM8;S4R3T6;A8MYJ8	O95167;H7C0D7;S4R3I5;H7C2R1;A8MVM8;S4R3T6;A8MYJ8	NADH dehydrogenase [ubiquinone] 1 alpha subcomplex subunit 3
NDUFB4	22.8208	23.6659	22.7508	0.00017753	4.6508	151640000	5	O95168;O95168-2;F2Z3P9;C9JXQ9	O95168;O95168-2;F2Z3P9;C9JXQ9	NADH dehydrogenase [ubiquinone] 1 beta subcomplex subunit 4
NDUFB8	22.2801	23.8154	17.9059	0.00067103	3.5238	182940000	3	O95169;O95169-3;E9PIZ8;K9J7I2;E9PQ68;O95169-2	O95169;O95169-3;E9PIZ8;K9J7I2;E9PQ68;O95169-2	NADH dehydrogenase [ubiquinone] 1 beta subcomplex subunit 8, mitochondrial
NDUFA7	25.3962	25.4487	24.561	0	6.4672	955310000	8	O95182;M0R0N0;M0R1K9	O95182;M0R0N0	NADH dehydrogenase [ubiquinone] 1 alpha subcomplex subunit 7
RTN3	25.6826	25.2143	25.0102	0	44.866	7495800000	14	O95197;O95197-3;O95197-4;O95197-7;O95197-2;O95197-5;B7Z4M1;F5H891;F5GWG7;F5H617;O95197-6	O95197;O95197-3;O95197-4;O95197-7;O95197-2;O95197-5;B7Z4M1;F5H891;F5GWG7;F5H617;O95197-6	Reticulon-3;Reticulon
LETM1	28.1418	27.7778	26.8876	0	231.91	31602000000	158	O95202;O95202-2;O95202-3	O95202	LETM1 and EF-hand domain-containing protein 1, mitochondrial
MBNL2;MBLL	18.5225	17.768	20.5609	0.0036369	2.5556	42209000	2	Q5VZF2;O95205;Q5VZF2-3;Q5VZF2-2	Q5VZF2;O95205;Q5VZF2-3;Q5VZF2-2	Muscleblind-like protein 2
STBD1	26.1832	25.3658	24.512	0	43.796	5339100000	37	O95210	O95210	Starch-binding domain-containing protein 1
ZRANB2	19.481	22.9573	22.2029	0.00018109	5.1034	379780000	7	O95218;O95218-2	O95218;O95218-2	Zinc finger Ran-binding domain-containing protein 2
SNX4	23.8026	23.348	22.0113	0	36.636	870110000	23	O95219;O95219-2;F8W9T3;F8WDD4	O95219;O95219-2	Sorting nexin-4
ZWINT	19.5305	20.0301	16.5595	0.00099453	3.3211	16061000	2	O95229;O95229-2;A6NH27	O95229;O95229-2;A6NH27	ZW10 interactor
KIF20A	22.9406	23.0063	22.532	0	51.929	1410000000	29	O95235;O95235-2;D6RBN1;D6R9E4	O95235;O95235-2	Kinesin-like protein KIF20A
KIF4A	25.6143	25.9343	24.9329	0	289.11	11362000000	134	O95239;O95239-2;Q2VIQ3;Q6ZMV9;Q5JRK0;H0Y718;F6VGH2;Q6ZMV9-3	O95239;O95239-2	Chromosome-associated kinesin KIF4A
MBD4	20.0293	19.9093	18.5792	0.00018175	5.1745	137840000	4	O95243;O95243-5;O95243-2;O95243-6;O95243-3	O95243;O95243-5;O95243-2;O95243-6;O95243-3	Methyl-CpG-binding domain protein 4
SBF1	22.0463	22.0981	20.8743	0	53.226	1151200000	39	O95248-4;O95248;G5E933;H0Y5W8	O95248-4;O95248;G5E933	Myotubularin-related protein 5
ABCC6	21.1851	20.3347	20.0364	0	14.82	331190000	10	O95255;E7ESW8	O95255	Multidrug resistance-associated protein 6
VAPB	27.7499	27.1403	26.4656	0	65.411	9309700000	39	O95292;E5RK64;O95292-2	O95292	Vesicle-associated membrane protein-associated protein B/C
SNAPIN	20.7792	22.3118	21.7496	0	15.986	94786000	2	O95295	O95295	SNARE-associated protein Snapin
MPZL1	24.8421	24.4016	23.4992	0	15.468	931650000	9	O95297;O95297-2;O95297-4;O95297-5	O95297;O95297-2;O95297-4	Myelin protein zero-like protein 1
MPZL1	19.5629	20.5798	18.008	0.0049984	2.3625	10971000	1	O95297-3;Q9UEL6	O95297-3;Q9UEL6	Myelin protein zero-like protein 1
FKBP9	25.9962	24.9326	24.257	0	48.026	3688900000	35	O95302;O95302-3;O95302-2;C9J4P8;Q75LS8	O95302;O95302-3;O95302-2	Peptidyl-prolyl cis-trans isomerase FKBP9
PGLS	27.0303	27.4536	25.6267	0	95.043	5099900000	42	O95336;M0R261;M0R0U3;M0R1L2	O95336;M0R261;M0R0U3	6-phosphogluconolactonase
PAPSS2	24.7549	24.5447	24.1163	0	55.819	3155900000	47	O95340;O95340-2	O95340;O95340-2	Bifunctional 3-phosphoadenosine 5-phosphosulfate synthase 2;Sulfate adenylyltransferase;Adenylyl-sulfate kinase
SMC2	26.0345	26.0589	25.0799	0	276.59	14377000000	149	O95347;O95347-2;Q5T821	O95347;O95347-2	Structural maintenance of chromosomes protein 2
ATG7	22.2119	21.6994	20.892	0	20.533	488430000	15	O95352;O95352-3;O95352-2;C9JNU2;C9JKA3;H7C2R3;H7BZ92;H7C059;C9JE55;H7C2J8;C9J415;C9JFF4;C9JGL2;F8WDY9	O95352;O95352-3;O95352-2	Ubiquitin-like modifier-activating enzyme ATG7
FARS2	22.3211	22.028	21.2929	0	7.4495	336660000	5	O95363;Q5JRF7	O95363	Phenylalanine--tRNA ligase, mitochondrial
LYPLA2	25.7761	26.2832	25.8498	0	24.865	2776700000	22	O95372;Q5QPQ1;Q5QPQ0;Q5QPQ3;Q5QPQ2;Q5QPN9;Q5QPN5	O95372;Q5QPQ1;Q5QPQ0;Q5QPQ3;Q5QPQ2;Q5QPN9	Acyl-protein thioesterase 2
IPO7	26.6854	26.9239	26.0881	0	237.81	16880000000	115	O95373;E9PLJ0;E9PLB2	O95373	Importin-7
ARIH2	22.8239	21.0355	20.3812	0	81.218	371490000	10	O95376;C9JZ71;C9JCL4;F8WCS4;C9JBC5	O95376	E3 ubiquitin-protein ligase ARIH2
SLU7	21.6135	20.9829	19.8379	0	16.549	219710000	7	O95391;E5RGM7;E5RK41	O95391	Pre-mRNA-splicing factor SLU7
PGM3	26.7565	26.7862	26.2076	0	68.118	11221000000	70	O95394;O95394-3;O95394-4;J3KN95;D6RCQ8;D6RF77;D6RIS6;D6RCD1;H0Y8I3;D6RC77;H0Y987	O95394;O95394-3;O95394-4;J3KN95	Phosphoacetylglucosamine mutase
MOCS3	22.13	22.252	20.6015	0	15.859	391770000	12	O95396	O95396	Adenylyltransferase and sulfurtransferase MOCS3;Molybdopterin-synthase adenylyltransferase;Molybdopterin-synthase sulfurtransferase
CD2BP2	26.4977	26.1335	23.9631	0	57.851	2999200000	33	O95400	O95400	CD2 antigen cytoplasmic tail-binding protein 2
ZFYVE9	17.5619	18.8986	17.6655	0.0040855	2.4555	63645000	2	O95405;O95405-3;O95405-2	O95405;O95405-3;O95405-2	Zinc finger FYVE domain-containing protein 9
BAG4	23.638	23.2663	21.8792	0	42.089	473430000	15	O95429;O95429-2	O95429;O95429-2	BAG family molecular chaperone regulator 4
AHSA1	27.2095	27.4385	26.3485	0	122.14	10852000000	72	O95433;O95433-2;G3V438;H0YJG7;H0YJU2;H0YJ63;G3V3W9;H0YJG6	O95433;O95433-2;G3V438;H0YJG7	Activator of 90 kDa heat shock protein ATPase homolog 1
PARN	24.4574	23.0607	22.4509	0	30.678	1261400000	21	O95453;O95453-2;O95453-3;B4DSB0;H3BRK1;F5H1Z4	O95453;O95453-2;O95453-3;B4DSB0	Poly(A)-specific ribonuclease PARN
PSMG1	23.9619	24.0064	23.3609	0	12.252	779380000	9	O95456;O95456-2;F8WBH7	O95456;O95456-2	Proteasome assembly chaperone 1
SGPL1	26.0988	24.7478	24.2966	0	43.662	4608000000	43	O95470;H7BXL7;H0Y3V8	O95470	Sphingosine-1-phosphate lyase 1
ABCA1	21.7931	20.1056	18.4011	0	25.504	626190000	11	O95477	O95477	ATP-binding cassette sub-family A member 1
NSA2	26.3601	26.2379	25.6826	0	32.679	3286000000	28	O95478;H0YAI9	O95478	Ribosome biogenesis protein NSA2 homolog
H6PD	24.4711	25.8137	23.9865	0	60.731	4808300000	49	O95479;R4GMU1	O95479;R4GMU1	GDH/6PGL endoplasmic bifunctional protein;Glucose 1-dehydrogenase;6-phosphogluconolactonase
SEC24A	26.4	26.3497	25.4962	0	137.71	10470000000	113	O95486;O95486-2;H0Y9J6	O95486	Protein transport protein Sec24A
SEC24B	24.5135	24.6758	23.6161	0	135.43	2697300000	53	O95487;O95487-3;O95487-2	O95487;O95487-3;O95487-2	Protein transport protein Sec24B
TDP2	21.6118	21.5967	20.7235	0	5.9145	156220000	3	O95551;X6R5A3;O95551-3;O95551-2	O95551;X6R5A3;O95551-3;O95551-2	Tyrosyl-DNA phosphodiesterase 2
MPC2	25.8272	26.3842	26.699	0	13.884	2328600000	13	O95563;Q5R3B4	O95563;Q5R3B4	Mitochondrial pyruvate carrier 2
ETHE1	23.1439	23.1642	20.8654	0	15.339	418910000	10	O95571;M0QXB5;M0QY80	O95571;M0QXB5	Persulfide dioxygenase ETHE1, mitochondrial
ACSL3	29.3332	28.8941	28.0556	0	266.43	60867000000	203	O95573;H7C260;H7BYZ7;F5H062;F5GWH2;C9JC11	O95573	Long-chain-fatty-acid--CoA ligase 3
POLR1A	23.8005	23.5715	22.8684	0	155.51	4386400000	87	O95602;B9ZVN9	O95602;B9ZVN9	DNA-directed RNA polymerase I subunit RPA1;DNA-directed RNA polymerase
YEATS4	23.9939	24.0346	21.9847	0	25.357	760840000	13	O95619;F8W0J4;F8W1B9;F8VTR4	O95619;F8W0J4;F8W1B9	YEATS domain-containing protein 4
ZBTB11	22.1838	21.7567	19.1183	0	20.373	461140000	11	O95625;C9J2L2	O95625	Zinc finger and BTB domain-containing protein 11
CNOT4	18.4187	21.6683	21.2549	0	7.4316	223740000	8	O95628-4;O95628-8;O95628-9;O95628-10;O95628;O95628-2;O95628-3;O95628-7;O95628-6;O95628-5	O95628-4;O95628-8;O95628-9;O95628-10;O95628;O95628-2;O95628-3;O95628-7;O95628-6;O95628-5	CCR4-NOT transcription complex subunit 4
STAMBP	22.1203	22.536	20.6702	0	10.168	325960000	6	O95630;C9JK83	O95630;C9JK83	STAM-binding protein
CPSF4	25.6944	24.7959	23.9478	0	33.246	1783600000	19	O95639-2;O95639;B7Z7B0;O95639-3;C9JEV9;H7C419;C9K0K2;H7C016;A6NMK7;H9KVA5	O95639-2;O95639;B7Z7B0;O95639-3;C9JEV9	Cleavage and polyadenylation specificity factor subunit 4
CDS2	23.8997	23.9841	23.1295	0	20.732	873600000	14	O95674	O95674	Phosphatidate cytidylyltransferase 2
FGFR1OP	25.1534	25.1544	23.7945	0	120.39	1860500000	25	O95684;O95684-2;O95684-3;Q8N103-3	O95684;O95684-2	FGFR1 oncogene partner
PPP1R3D	19.6549	19.3249	18.1664	0.0054526	2.3023	11820000	1	O95685	O95685	Protein phosphatase 1 regulatory subunit 3D
BRD1	22.295	20.027	20.4525	0	13.386	496760000	11	O95696;O95696-2;J3KQ61;B4E3L9	O95696;O95696-2;J3KQ61;B4E3L9	Bromodomain-containing protein 1
HERC2	19.8592	19.2609	17.105	0	34.546	457880000	17	O95714;Q9BVR0	O95714	E3 ubiquitin-protein ligase HERC2
RAB3D	25.4954	25.1966	24.4758	0	38.231	1698900000	21	O95716;M0R257	O95716	Ras-related protein Rab-3D
SNAP29	25.1735	25.187	24.5636	0	26.961	1571600000	22	O95721;C9JAF7	O95721;C9JAF7	Synaptosomal-associated protein 29;Synaptosomal-associated protein
OXSR1	25.1893	25.7851	24.5495	0	72.837	3889000000	52	O95747;C9JIG9;F8WBK9	O95747;C9JIG9	Serine/threonine-protein kinase OSR1
LDOC1	18.0921	18.8364	17.4369	0.00052002	4.1509	0	1	O95751	O95751	Protein LDOC1
HSPA4L	24.3299	24.2567	22.8581	0	57.715	3051400000	44	O95757;E9PDE8;D6RJ96	O95757;E9PDE8;D6RJ96	Heat shock 70 kDa protein 4L
PTBP3	26.6555	26.2583	25.5891	0	78.833	5304200000	65	O95758;O95758-2;O95758-4;O95758-7;O95758-1;O95758-6;O95758-5;X6R242	O95758;O95758-2;O95758-4;O95758-7;O95758-1;O95758-6;O95758-5	Polypyrimidine tract-binding protein 3
STARD3NL	23.0318	21.6267	22.2727	0	6.4368	196070000	5	O95772-2	O95772-2	MLN64 N-terminal domain homolog
LSM8	26.042	26.9756	26.4713	0	53.629	2286800000	25	O95777;C9JIZ0;F2Z2Y6;C9JNV3	O95777;C9JIZ0;F2Z2Y6	U6 snRNA-associated Sm-like protein LSm8
AP2A1	26.8094	26.3539	25.3067	0	168.73	15588000000	106	O95782;O95782-2;M0R2D9;E9PPZ3;E9PS94;E9PPY8	O95782;O95782-2	AP-2 complex subunit alpha-1
STAU1	28.1833	27.6735	26.8598	0	160.33	27664000000	127	O95793;O95793-2;Q5JW30;F6UDC6	O95793;O95793-2;Q5JW30	Double-stranded RNA-binding protein Staufen homolog 1
TTC4	21.0111	21.9471	21.2662	0	7.7591	209580000	6	O95801;Q5TA95	O95801;Q5TA95	Tetratricopeptide repeat protein 4
SDPR	23.9554	22.9716	21.9376	0	31.116	957070000	15	O95810	O95810	Serum deprivation-response protein
BAG2	26.6576	26.6319	25.578	0	42.345	4510300000	35	O95816;O95816-2;A2A296	O95816;O95816-2	BAG family molecular chaperone regulator 2
BAG3	24.5961	25.0282	23.5965	0	58.742	3268200000	43	O95817;C9JFK9	O95817;C9JFK9	BAG family molecular chaperone regulator 3
MAP4K4	21.4385	19.6823	18.859	0.00051449	3.9432	241050000	2	O95819-5;O95819-4;O95819-2;O95819-3	O95819-5;O95819-4;O95819-2;O95819-3	Mitogen-activated protein kinase kinase kinase kinase 4
MLYCD	18.6241	18.8231	19.0726	0	6.7853	28424000	2	O95822;O95822-2	O95822;O95822-2	Malonyl-CoA decarboxylase, mitochondrial
AIFM1	29.2545	28.688	27.7181	0	254.1	49341000000	156	O95831;O95831-3;O95831-2;E9PMA0;O95831-4;O95831-6;O95831-5	O95831;O95831-3;O95831-2	Apoptosis-inducing factor 1, mitochondrial
CLDN1	25.478	25.0057	23.068	0	12.638	1046100000	14	O95832	O95832	Claudin-1
LATS1	18.3617	18.5986	19.1973	0.0001779	4.694	38429000	2	O95835;O95835-2	O95835;O95835-2	Serine/threonine-protein kinase LATS1
BPNT1	25.6828	26.5339	25.3718	0	54.007	5147500000	43	O95861;O95861-4;O95861-2;A6NF51;O95861-3;F8W1J0;F8VVW8;F8VZG4;F8VRY7	O95861;O95861-4;O95861-2;A6NF51;O95861-3;F8W1J0	3(2),5-bisphosphate nucleotidase 1
FADS2	29.7832	29.286	28.3352	0	74.688	42760000000	99	O95864;O95864-3;O95864-4;O95864-2;E5RGZ5;E5RGD8	O95864;O95864-3;O95864-4;O95864-2	Fatty acid desaturase 2
DDAH2	24.5759	25.3562	24.1962	0	67.72	2053900000	27	O95865;Q5SSV3;Q5SRR8;H0Y7N1	O95865;Q5SSV3;Q5SRR8;H0Y7N1	N(G),N(G)-dimethylarginine dimethylaminohydrolase 2
ABHD16A	22.4874	22.2115	21.5263	0	27.759	505920000	10	O95870;O95870-2	O95870;O95870-2	Abhydrolase domain-containing protein 16A
C6orf47	22.4438	22.8641	16.5133	0	7.6123	176840000	5	O95873	O95873	Uncharacterized protein C6orf47
TXNDC12	28.4049	26.9627	26.3801	0	41.444	6742000000	31	O95881;V9GY50;V9GYV4	O95881	Thioredoxin domain-containing protein 12
TRUB2	19.6362	19.8393	19.0293	0.0011481	3.1418	29462000	2	O95900;O95900-2	O95900;O95900-2	Probable tRNA pseudouridine synthase 2
SYF2	23.7886	23.4519	22.6889	0	71.709	440300000	10	O95926;O95926-2	O95926;O95926-2	Pre-mRNA-splicing factor SYF2
TOP3B	17.8419	19.768	17.5964	0	7.4037	93345000	5	O95985;H0Y6W0;O95985-3;O95985-2	O95985;H0Y6W0;O95985-3;O95985-2	DNA topoisomerase 3-beta-1;DNA topoisomerase
AGR2	29.3122	28.6526	28.4253	0	52.765	17788000000	40	O95994;B5MC07;C9J3E2;H7C3Z9;Q8TD06;H7C040;B5MC62	O95994;B5MC07;C9J3E2	Anterior gradient protein 2 homolog
BCL10	18.7252	21.2418	17.8858	0.00099157	3.2789	24798000	1	O95999	O95999	B-cell lymphoma/leukemia 10
CLPTM1	27.3543	26.5008	25.66	0	144	11316000000	60	O96005;O96005-4;O96005-3;K7EQQ1;K7EJ16;K7ERL5	O96005;O96005-4;O96005-3	Cleft lip and palate transmembrane protein 1
ZBED1	19.7054	18.73	17.937	0.0028681	2.701	43983000	2	O96006	O96006	Zinc finger BED domain-containing protein 1
MOCS2	22.1187	19.5814	18.216	0	7.0151	70780000	2	O96007	O96007	Molybdopterin synthase catalytic subunit
TOMM40	28.0627	27.8311	26.666	0	130.39	8583200000	44	O96008;O96008-2;K7EKG4;K7EJ57	O96008;O96008-2	Mitochondrial import receptor subunit TOM40 homolog
PEX11B	20.7443	17.3482	17.4772	0.0019421	2.9534	24591000	2	O96011;O96011-2	O96011;O96011-2	Peroxisomal membrane protein 11B
PAK4	25.8881	26.3989	24.6557	0	70.727	5293600000	54	O96013;O96013-4;O96013-2;O96013-3;M0R2X4;M0R1R1;M0R0L9;M0R3G6;Q9P286;Q9NQU5;Q9NQU5-2	O96013;O96013-4;O96013-2;O96013-3	Serine/threonine-protein kinase PAK 4
CHEK2	23.0275	23.5833	21.8601	0	67.757	909220000	12	O96017;O96017-12;O96017-9;H0Y820;O96017-13;O96017-4;O96017-11;H0Y4V6;O96017-8;O96017-7;H7C0V7;B7ZBF2;C9JFD7;E7EPP1;B7ZBF7;B7ZBF6;O96017-3;O96017-5;O96017-2	O96017;O96017-12;O96017-9;H0Y820;O96017-13;O96017-4;O96017-11	Serine/threonine-protein kinase Chk2
ACTL6A	27.7286	27.5159	26.089	0	180.3	12474000000	82	O96019;O96019-2;H7C5S0;C9JQT2;O94805	O96019;O96019-2	Actin-like protein 6A
WHSC1	23.7497	23.5883	22.5174	0	101.72	3036900000	44	O96028;O96028-5;O96028-3;O96028-6;D6R9V2;D6RIS1;O96028-7;H0Y9L4;O96028-4;O96028-2;H0Y9U6;D6RFE7	O96028;O96028-5;O96028-3;O96028-6;D6R9V2	Histone-lysine N-methyltransferase NSD2
CYB5A	29.3772	28.4767	27.4417	0	96.157	8840200000	33	P00167;P00167-2;P00167-3;J3KNC7	P00167;P00167-2;P00167-3	Cytochrome b5
LDHA	30.2458	30.1523	29.9489	0	201.23	77055000000	120	P00338;P00338-3;P00338-4;P00338-2;P00338-5;F5GXY2;F5GYU2;F5GXH2;F5H5J4;F5H6W8;F5GZQ4;Q6ZMR3;F5H8H6;F5GXC7;F5GWW2;P07195;P07864;F5GXU1;F5H5G7;F5H155;A8MW50;G3XAP5;F5H245	P00338;P00338-3;P00338-4;P00338-2;P00338-5	L-lactate dehydrogenase A chain
ALDH1A1	31.3162	31.2597	30.73	0	323.31	223000000000	359	P00352;Q5SYQ9;Q5SYQ8;Q5SYQ7;P47895;H0Y2X5	P00352	Retinal dehydrogenase 1
GLUD1	30.7702	30.3907	29.8442	0	288.7	191000000000	293	P00367;P00367-3;P00367-2	P00367;P00367-3;P00367-2	Glutamate dehydrogenase 1, mitochondrial
DHFR	24.869	25.5488	23.7306	0	27.235	1529400000	24	P00374;P00374-2;B4DM58;Q86XF0;C9JJ68	P00374;P00374-2;B4DM58	Dihydrofolate reductase
CYB5R3	29.7125	29.2472	28.5795	0	208.28	33201000000	109	P00387;P00387-2;P00387-3;B1AHF3	P00387;P00387-2;P00387-3;B1AHF3	NADH-cytochrome b5 reductase 3;NADH-cytochrome b5 reductase 3 membrane-bound form;NADH-cytochrome b5 reductase 3 soluble form
GSR	28.029	27.9224	27.1064	0	245.3	19782000000	86	P00390;P00390-2;P00390-3;P00390-4;P00390-5;H0YC68;E5RI06	P00390;P00390-2;P00390-3;P00390-4;P00390-5	Glutathione reductase, mitochondrial
MT-CO1	24.8877	24.0333	22.7623	0	6.2492	429140000	6	P00395	P00395	Cytochrome c oxidase subunit 1
MT-CO2	28.9803	28.5248	27.3808	0	22.071	10651000000	34	P00403	P00403	Cytochrome c oxidase subunit 2
MT-CO3	24.1596	23.6779	22.8626	0.0016324	3.0746	160710000	2	P00414	P00414	Cytochrome c oxidase subunit 3
PAH	24.3283	24.2696	23.4841	0	52.976	1758600000	25	P00439;J3KND8;F8W0A0;F8W1D4	P00439;J3KND8;F8W0A0	Phenylalanine-4-hydroxylase
SOD1	29.4103	29.8808	28.3632	0	106.61	21241000000	44	P00441;H7BYH4	P00441;H7BYH4	Superoxide dismutase [Cu-Zn]
PNP	26.5313	26.9718	25.4915	0	95.65	6340900000	63	P00491;G3V5M2;G3V2H3;G3V393	P00491;G3V5M2	Purine nucleoside phosphorylase
HPRT1	23.9631	23.7315	23.472	0	15.99	664260000	13	P00492;Q9NRG1;Q9NRG1-2	P00492	Hypoxanthine-guanine phosphoribosyltransferase
GOT2	29.0878	28.5324	27.8435	0	120.1	40956000000	125	P00505;P00505-2	P00505;P00505-2	Aspartate aminotransferase, mitochondrial
EGFR	25.8748	25.0476	23.8776	0	166.15	9338100000	90	P00533;E9PFD7;Q504U8;P00533-4;P00533-3;P00533-2;C9JYS6;Q15303;J3KTI5;H3BLT0;Q15303-4;Q15303-3;Q15303-2	P00533;E9PFD7;Q504U8;P00533-4;P00533-3	Epidermal growth factor receptor;Receptor protein-tyrosine kinase
PGK1	29.1737	29.0822	28.4152	0	165.33	52014000000	175	P00558;P00558-2;P07205	P00558;P00558-2	Phosphoglycerate kinase 1
AK1	26.296	26.4759	25.4187	0	45.335	2964500000	44	P00568;Q5T9B7;H0Y4J6;H0YID2;Q9Y6K8-2	P00568;Q5T9B7;H0Y4J6	Adenylate kinase isoenzyme 1
F2	24.7892	24.2389	22.6643	0	65.439	2119500000	33	P00734;E9PIT3;C9JV37	P00734;E9PIT3	Prothrombin;Activation peptide fragment 1;Activation peptide fragment 2;Thrombin light chain;Thrombin heavy chain
F12	22.3617	21.0079	20.5459	0	6.6139	291510000	3	P00748	P00748	Coagulation factor XII;Coagulation factor XIIa heavy chain;Beta-factor XIIa part 1;Coagulation factor XIIa light chain
MT-ATP6	25.8304	26.7677	24.5901	0.0005193	4.1374	398370000	3	P00846	P00846	ATP synthase subunit a
CA2	26.9774	26.4241	26.1963	0	174.16	4517000000	29	P00918;E5RID5;E5RK37	P00918	Carbonic anhydrase 2
ASS1	22.9687	23.3116	22.1634	0	16.61	695500000	9	P00966;Q5T6L5;Q5T6L6;Q5T6L7	P00966;Q5T6L5;Q5T6L6	Argininosuccinate synthase
SPINK1	22.3166	23.5857	23.8558	0.0040984	2.4898	232640000	5	P00995	P00995	Pancreatic secretory trypsin inhibitor
SERPINC1	18.6911	18.4687	18.4634	0.00051903	4.1286	26910000	2	P01008	P01008	Antithrombin-III
SERPINA1	27.9558	27.0796	26.3882	0	201.03	13254000000	100	P01009;P01009-2;P01009-3;G3V2B9;G3V544;G3V5R8;G3V387	P01009;P01009-2;P01009-3	Alpha-1-antitrypsin;Short peptide from AAT
AGT	25.6826	25.4595	24.3844	0	121.57	2930400000	26	P01019	P01019	Angiotensinogen;Angiotensin-1;Angiotensin-2;Angiotensin-3;Angiotensin-4;Angiotensin 1-9;Angiotensin 1-7;Angiotensin 1-5;Angiotensin 1-4
A2M	24.3779	23.8092	23.066	0	95.217	4121800000	67	P01023;P20742-2;F8W7L3;H0YFH1	P01023	Alpha-2-macroglobulin
C3	25.071	24.8871	23.1036	0	272	9608000000	137	P01024;M0QYC8;M0QXZ3;M0R0Q9	P01024	Complement C3;Complement C3 beta chain;C3-beta-c;Complement C3 alpha chain;C3a anaphylatoxin;Acylation stimulating protein;Complement C3b alpha chain;Complement C3c alpha chain fragment 1;Complement C3dg fragment;Complement C3g fragment;Complement C3d fragment;Complement C3f fragment;Complement C3c alpha chain fragment 2
C5	22.8499	22.4426	21.3408	0	53.255	1676900000	36	P01031;CON__Q1A7A4	P01031	Complement C5;Complement C5 beta chain;Complement C5 alpha chain;C5a anaphylatoxin;Complement C5 alpha chain
CSTA	21.3988	23.6867	17.0829	0	10.98	303780000	7	P01040;C9J0E4	P01040;C9J0E4	Cystatin-A;Cystatin-A, N-terminally processed
NRAS	24.7285	24.5268	21.4806	0	8.8748	548960000	6	P01111	P01111	GTPase NRas
KRAS	26.4489	25.9445	25.2823	0	26.085	2415100000	22	P01116-2;P01116	P01116-2;P01116	GTPase KRas;GTPase KRas, N-terminally processed
IGF2	23.6981	24.3396	20.4584	0	7.9292	543320000	9	P01344;P01344-3;P01344-2	P01344;P01344-3;P01344-2	Insulin-like growth factor II;Insulin-like growth factor II;Insulin-like growth factor II Ala-25 Del;Preptin
COL2A1	19.2557	20.3112	16.0379	0.00256	2.7496	26834000	2	P02458;P02458-1;P02458-3	P02458;P02458-1;P02458-3	Collagen alpha-1(II) chain;Collagen alpha-1(II) chain;Chondrocalcin
LMNA	30.2606	29.8356	28.7046	0	323.31	144000000000	313	P02545;P02545-6;P02545-3;P02545-2;P02545-5;P02545-4;Q5TCI8;H0YAB0;REV__Q5VX52	P02545;P02545-6;P02545-3;P02545-2;P02545-5;P02545-4;Q5TCI8	Prelamin-A/C;Lamin-A/C
APOA1	26.7919	26.3846	25.4895	0	70.544	5054000000	46	P02647;F8W696	P02647;F8W696	Apolipoprotein A-I;Proapolipoprotein A-I;Truncated apolipoprotein A-I
APOE	28.3573	28.2446	26.8904	0	285.68	22052000000	65	P02649;H0Y7L5;E9PEV4;E7ERP7	P02649;H0Y7L5;E9PEV4;E7ERP7	Apolipoprotein E
APOA2	22.5524	23.5074	23.4191	0	9.3655	154120000	3	P02652;V9GYE3;V9GYM3;V9GYC1;V9GYS1;V9GYG9	P02652;V9GYE3;V9GYM3;V9GYC1;V9GYS1;V9GYG9	Apolipoprotein A-II;Proapolipoprotein A-II;Truncated apolipoprotein A-II
FGA	26.5518	25.7612	25.4757	0	91.144	8773300000	71	P02671-2;P02671;CON__P02672	P02671-2;P02671	Fibrinogen alpha chain;Fibrinopeptide A;Fibrinogen alpha chain
FGB	27.7504	27.3886	26.1232	0	277.24	17182000000	85	P02675;D6REL8	P02675;D6REL8	Fibrinogen beta chain;Fibrinopeptide B;Fibrinogen beta chain
FN1	25.9919	25.4132	24.2765	0	308.9	17551000000	153	P02751;P02751-3;P02751-17;P02751-7;P02751-15;P02751-6;P02751-14;P02751-8;P02751-9;P02751-11;P02751-4;P02751-12;H0Y7Z1;P02751-2;P02751-16;H0Y4K8	P02751;P02751-3;P02751-17;P02751-7;P02751-15;P02751-6;P02751-14;P02751-8;P02751-9;P02751-11;P02751-4;P02751-12	Fibronectin;Anastellin;Ugl-Y1;Ugl-Y2;Ugl-Y3
RBP4	28.1335	27.8861	26.2018	0	53.25	7843300000	42	P02753;Q5VY30	P02753;Q5VY30	Retinol-binding protein 4;Plasma retinol-binding protein(1-182);Plasma retinol-binding protein(1-181);Plasma retinol-binding protein(1-179);Plasma retinol-binding protein(1-176)
AMBP	27.1694	26.4735	25.7134	0	108.48	6507600000	40	P02760;S4R471;S4R3Y4	P02760;S4R471;S4R3Y4	Protein AMBP;Alpha-1-microglobulin;Inter-alpha-trypsin inhibitor light chain;Trypstatin
ORM1	26.3639	25.3635	24.1348	0	34.494	1782300000	19	P02763	P02763	Alpha-1-acid glycoprotein 1
AHSG	25.7598	25.6435	25.0777	0	26.777	2421700000	13	P02765;C9JV77	P02765;C9JV77	Alpha-2-HS-glycoprotein;Alpha-2-HS-glycoprotein chain A;Alpha-2-HS-glycoprotein chain B
TTR	21.6215	23.2708	18.259	0	10.734	161170000	7	P02766	P02766	Transthyretin
GC	27.537	26.8467	25.8328	0	203.22	12869000000	71	P02774;P02774-3;D6RF35;P02774-2;D6RBJ7;D6RF20	P02774;P02774-3;D6RF35;P02774-2;D6RBJ7	Vitamin D-binding protein
TFRC	29.6156	29.0477	28.3398	0	323.31	94014000000	248	P02786;G3V0E5;H7C3V5;F8WBE5;Q9UP52;Q9UP52-2;Q9UP52-3	P02786;G3V0E5	Transferrin receptor protein 1;Transferrin receptor protein 1, serum form
TF	28.2337	27.4598	26.7704	0	323.31	34416000000	140	P02787;F8WCI6;H7C5E8;C9JB55;F8WEK9;C9JVG0;F8WC57	P02787	Serotransferrin
FTL	30.5735	30.1174	30.049	0	66.516	32932000000	67	P02792	P02792	Ferritin light chain
FTH1	28.9543	28.8598	28.2268	0	45.925	16792000000	55	P02794;G3V192;G3V1D1;E9PRK8;E9PKY7;E9PPQ4;E9PQR3;E9PKM5;E9PK45	P02794;G3V192;G3V1D1	Ferritin heavy chain;Ferritin heavy chain, N-terminally processed;Ferritin
MT-ND1	24.1398	22.8001	23.9973	0	8.0562	369380000	7	P03886	P03886	NADH-ubiquinone oxidoreductase chain 1
MT-ND4	25.3383	24.4522	23.3853	0	40.939	841880000	17	P03905	P03905	NADH-ubiquinone oxidoreductase chain 4
MT-ND5	21.5567	21.4932	21.7783	0	18.185	216340000	3	P03915	P03915	NADH-ubiquinone oxidoreductase chain 5
VTN	23.1491	22.0317	21.3575	0	12.106	549090000	15	P04004;H0YJW9	P04004	Vitronectin;Vitronectin V65 subunit;Vitronectin V10 subunit;Somatomedin-B
HMGCR	24.0997	23.9016	22.3671	0	42.714	1909500000	36	P04035;P04035-2;P04035-3;H0Y8K6;H0Y8F6	P04035;P04035-2;P04035-3	3-hydroxy-3-methylglutaryl-coenzyme A reductase
CAT	29.1431	28.5529	27.8357	0	221.02	44760000000	156	P04040	P04040	Catalase
RAF1	23.886	24.5314	23.4924	0	48.079	2407500000	26	P04049;P04049-2;H7C155;H7C4S5	P04049;P04049-2;H7C155	RAF proto-oncogene serine/threonine-protein kinase
GBA	25.4141	24.671	23.8052	0	64.219	2889200000	36	P04062;P04062-4;P04062-2;P04062-5;P04062-3	P04062;P04062-4;P04062-2;P04062-5;P04062-3	Glucosylceramidase
FUCA1	20.295	20.7772	19.8678	0	7.5091	137270000	5	P04066	P04066	Tissue alpha-L-fucosidase
ALDOA	30.8503	30.6464	30.1112	0	323.31	141000000000	254	P04075;J3KPS3;P04075-2;H3BQN4;H3BPS8;H3BUH7;H3BR04;H3BMQ8;H3BU78;H3BR68;P05062;Q5T7D5	P04075;J3KPS3;P04075-2;H3BQN4;H3BPS8	Fructose-bisphosphate aldolase A;Fructose-bisphosphate aldolase
CSTB	29.0301	28.6482	28.7552	0	77.732	9200700000	39	P04080	P04080	Cystatin-B
ANXA1	18.8287	18.5277	20.6391	0.00018169	5.1608	32660000	2	P04083;Q5T3N0;Q5T3N1	P04083;Q5T3N0;Q5T3N1	Annexin A1;Annexin
APOB	26.8813	26.2176	25.5261	0	323.31	79521000000	655	P04114;A8MUN2	P04114	Apolipoprotein B-100;Apolipoprotein B-48
NR3C1	22.6631	22.9846	20.6007	0	88.325	916560000	25	P04150;P04150-8;P04150-3;P04150-9;P04150-2;P04150-6;P04150-10;P04150-5;P04150-7;D6RDA9;Q3MSN4	P04150;P04150-8;P04150-3;P04150-9;P04150-2;P04150-6;P04150-10;P04150-5;P04150-7	Glucocorticoid receptor
SOD2	28.6153	28.9514	28.0573	0	278.79	17353000000	65	P04179;P04179-4;F5H4R2;F5GYZ5;P04179-2;F5H3C5;P04179-3;G8JLJ2;G5E9P6;F5GXZ9	P04179;P04179-4;F5H4R2;F5GYZ5;P04179-2;F5H3C5;P04179-3	Superoxide dismutase [Mn], mitochondrial
OAT	28.4321	28.0721	27.5179	0	126.61	19426000000	112	P04181;P04181-2	P04181;P04181-2	Ornithine aminotransferase, mitochondrial;Ornithine aminotransferase, hepatic form;Ornithine aminotransferase, renal form
TK1	24.7481	25.303	24.1536	0	20.507	1285900000	11	P04183;K7ES52;K7ERJ1;K7ERV3;K7ENW5	P04183;K7ES52;K7ERJ1;K7ERV3	Thymidine kinase, cytosolic;Thymidine kinase
GAPDH	32.2348	32.4312	31.7645	0	323.31	302000000000	343	P04406;E7EUT5;O14556	P04406;E7EUT5	Glyceraldehyde-3-phosphate dehydrogenase
ASL	26.5452	26.9923	25.944	0	70.247	8208400000	65	P04424;P04424-2;P04424-3;F8W943	P04424;P04424-2;P04424-3;F8W943	Argininosuccinate lyase
ERBB2	20.7984	18.9893	15.2129	0	11.028	214350000	6	P04626;P04626-5;P04626-4;B4DTR1;J3QLU9;P04626-3;P04626-2;P04626-6;F5H1T4;J3QL83;J3KRI9;J3QLV2;J3KS21	P04626;P04626-5;P04626-4;B4DTR1;J3QLU9;P04626-3;P04626-2;P04626-6	Receptor tyrosine-protein kinase erbB-2;Receptor protein-tyrosine kinase
CAPNS1	27.1599	27.362	25.8691	0	124.11	5238600000	45	P04632;K7ELJ7;A0A075B7C0;U3KQE2;K7EM73;K7EIV0;K7EKD8;U3KPR7;Q96L46;K7ES78;K7EMQ1	P04632;K7ELJ7;A0A075B7C0;U3KQE2;K7EM73;K7EIV0;K7EKD8	Calpain small subunit 1
TP53	20.294	23.3336	21.6592	0	10.23	407540000	10	P04637;P04637-4;J3KP33;P04637-7;P04637-5;P04637-6;P04637-2;P04637-3;E7ESS1;E7EQX7;P04637-8;P04637-9;E9PCY9;S4R334;E9PFT5;E7EMR6	P04637;P04637-4;J3KP33;P04637-7;P04637-5;P04637-6;P04637-2;P04637-3;E7ESS1;E7EQX7;P04637-8;P04637-9	Cellular tumor antigen p53
HSPB1	28.8506	29.3381	27.973	0	270.3	24585000000	89	P04792;F8WE04;C9J3N8	P04792;F8WE04	Heat shock protein beta-1
TYMS	25.6935	26.2333	25.7625	0	48.031	3717400000	40	P04818;P04818-2;P04818-3	P04818;P04818-2;P04818-3	Thymidylate synthase
RPN1	29.8988	29.5458	28.8854	0	323.31	108000000000	235	P04843;B7Z4L4;F8WF32	P04843;B7Z4L4	Dolichyl-diphosphooligosaccharide--protein glycosyltransferase subunit 1
RPN2	30.4078	29.8683	29.0139	0	323.31	84289000000	195	P04844;P04844-2;Q5JYR7;Q5JYR4;F2Z3K5;H0Y5M1;Q5JYR3	P04844;P04844-2	Dolichyl-diphosphooligosaccharide--protein glycosyltransferase subunit 2
GNAI2	27.6423	27.413	26.1525	0	139.24	10366000000	62	P04899;P04899-6;P04899-3;P04899-5;P04899-2;P04899-4;P09471-2;P09471;P19087;A8MTJ3;P11488;A2A2R6;H3BTM2;P38405-3	P04899;P04899-6;P04899-3;P04899-5;P04899-2;P04899-4	Guanine nucleotide-binding protein G(i) subunit alpha-2
SLC4A2	24.1856	23.6152	22.4072	0	48.439	2576700000	37	P04920-3;P04920;J3KNG9;P04920-2;P48751;H7C1Z2;E9PCP1;F8WD49;P48751-2;P48751-3;C9J9M9	P04920-3;P04920;J3KNG9;P04920-2	Anion exchange protein 2;Anion exchange protein
ATP1A1	29.5389	29.0261	28.069	0	323.31	96049000000	234	P05023;P05023-4;P05023-3;P05023-2;P13637;M0R116;P13637-2;P13637-3;P50993;B1AKY9;H0Y7C1;Q13733;P54707;P20648;Q5TC01;P54707-2;Q5TC02;E9PRA5;Q5TC05;M0QXF2	P05023;P05023-4;P05023-3;P05023-2	Sodium/potassium-transporting ATPase subunit alpha-1
ATP1B1	28.7216	28.0014	27.3237	0	109.61	15009000000	50	P05026;P05026-2;V9GYR2	P05026;P05026-2;V9GYR2	Sodium/potassium-transporting ATPase subunit beta-1
APP	25.5908	25.2903	24.2048	0	61.523	5647100000	63	P05067;P05067-8;P05067-11;P05067-4;E9PG40;P05067-6;P05067-7;P05067-9;P05067-10;P05067-3;P05067-5;H7C0V9;P05067-2;H7C2L2	P05067;P05067-8;P05067-11;P05067-4;E9PG40;P05067-6;P05067-7;P05067-9;P05067-10;P05067-3;P05067-5;H7C0V9	Amyloid beta A4 protein;N-APP;Soluble APP-alpha;Soluble APP-beta;C99;Beta-amyloid protein 42;Beta-amyloid protein 40;C83;P3(42);P3(40);C80;Gamma-secretase C-terminal fragment 59;Gamma-secretase C-terminal fragment 57;Gamma-secretase C-terminal fragment 50;C31
ARG1	21.4977	19.7576	21.0832	0.00018021	5.004	127100000	4	P05089;P05089-2;P05089-3	P05089;P05089-2;P05089-3	Arginase-1
ALDH2	28.7566	28.2168	27.7726	0	121.21	28807000000	95	P05091;P05091-2;F8VP50;S4R3S4	P05091;P05091-2	Aldehyde dehydrogenase, mitochondrial
SERPINE1	23.7339	23.1517	19.1627	0	18.416	626560000	10	P05121;P05121-2	P05121;P05121-2	Plasminogen activator inhibitor 1
SLC25A5	30.657	30.3925	29.53	0	81.444	94834000000	121	P05141;Q9H0C2	P05141	ADP/ATP translocase 2;ADP/ATP translocase 2, N-terminally processed
SERPINA5	22.2772	21.2318	21.3222	0	15.835	266510000	9	P05154;G3V5Q9;G3V5I3;G3V264;G3V2M1;G3V482;G3V265	P05154;G3V5Q9	Plasma serine protease inhibitor
ISG15	18.6426	22.8691	22.5752	0.0011513	3.1827	233010000	3	P05161	P05161	Ubiquitin-like protein ISG15
PCCA	23.6988	23.1013	22.4128	0	71.054	1588300000	28	P05165;P05165-2;P05165-3;H0Y5U0;Q5JTW6;Q5JVH2	P05165;P05165-2;P05165-3	Propionyl-CoA carboxylase alpha chain, mitochondrial
EIF2S1	27.7387	28.2815	27.3768	0	94.786	18026000000	88	P05198;G3V4T5;H0YJS4	P05198;G3V4T5;H0YJS4	Eukaryotic translation initiation factor 2 subunit 1
HMGN2	32.1097	31.2459	30.8288	0	13.86	23013000000	20	P05204	P05204	Non-histone chromosomal protein HMG-17
ICAM1	26.8086	26.2213	25.1668	0	39.311	7895100000	46	P05362;K7EKL8;E7ESS4	P05362;K7EKL8	Intercellular adhesion molecule 1
RPLP1	31.4404	31.2547	29.1801	0	323.31	22698000000	26	P05386	P05386	60S acidic ribosomal protein P1
RPLP2	31.6662	31.5489	30.8085	0	257.7	52897000000	93	P05387;H0YDD8	P05387	60S acidic ribosomal protein P2
RPLP0;RPLP0P6	30.5622	30.5667	29.8505	0	194.29	72836000000	119	P05388;F8VWS0;P05388-2;F8VW21;F8VU65;F8VPE8;G3V210;F8VZS0;F8VQY6;F8VRK7;Q8NHW5;F8VWV4;F8VS58;F8W1K8	P05388;F8VWS0;P05388-2;F8VW21;F8VU65;F8VPE8;G3V210;F8VZS0;F8VQY6;F8VRK7;Q8NHW5	60S acidic ribosomal protein P0;60S acidic ribosomal protein P0-like
JUN	23.4809	22.8364	21.7112	0	12.2	322020000	10	P05412	P05412	Transcription factor AP-1
POLR3D	21.9909	22.1353	20.25	0	12.747	233990000	5	P05423;E5RHT4;E7EQ68	P05423;E5RHT4	DNA-directed RNA polymerase III subunit RPC4
SSB	29.1585	28.9299	28.0154	0	154.69	36980000000	114	P05455;E7ERC4;E9PGX9;E9PFL9	P05455;E7ERC4	Lupus La protein
SERPIND1	23.3873	23.0356	22.6339	0	25.898	853010000	17	P05546	P05546	Heparin cofactor 2
ITGB1	28.7719	27.9742	27.0786	0	196.42	40072000000	108	P05556;P05556-2;P05556-5;P05556-4;P05556-3;E7EQW5;C9JPK5;Q5T3E6;E9PLR6;E7EUI6;H7C4N8;E7ERX5	P05556;P05556-2;P05556-5;P05556-4;P05556-3	Integrin beta-1
KRT18	32.9703	32.537	31.799	0	323.31	611000000000	496	P05783;F8VZY9;CON__H-INV:HIT000015463;Q92764;CON__Q92764;C4AM86;CON__Q497I4	P05783;F8VZY9	Keratin, type I cytoskeletal 18
COL5A2	22.8337	22.3402	19.9967	0	88.015	1487400000	39	P05997	P05997	Collagen alpha-2(V) chain
UROD	26.2461	26.1762	25.6859	0	70.793	3974100000	49	P06132;H0Y5R6;Q5T446	P06132;H0Y5R6	Uroporphyrinogen decarboxylase
UGT2B4	25.777	24.3681	24.808	0	43.649	3476500000	33	P06133;G5E9X8;P06133-2;D6RGY0	P06133;G5E9X8;P06133-2	UDP-glucuronosyltransferase 2B4
INSR	21.1046	22.0771	20.2176	0	30.829	886280000	19	P06213;P06213-2;M0R3E6	P06213;P06213-2	Insulin receptor;Insulin receptor subunit alpha;Insulin receptor subunit beta
GLA	22.4421	21.924	21.3409	0	10.904	422650000	9	P06280;V9GYN5	P06280	Alpha-galactosidase A
GSN	23.6912	22.989	22.7389	0	42.18	1468800000	18	P06396;P06396-2;P06396-4;P06396-3;Q5T0H9;Q5T0I0;Q5T0H7;Q5T0H8	P06396;P06396-2;P06396-4;P06396-3;Q5T0H9	Gelsolin
RB1	23.85	24.2068	23.0588	0	183.09	2705100000	40	P06400	P06400	Retinoblastoma-associated protein
CDK1	28.6011	28.6578	27.6133	0	130.47	24334000000	126	P06493;P06493-2;E5RIU6;K7ELV5;O94921;Q07002;Q07002-3;E7EUK8;O94921-3;O94921-2;Q07002-2	P06493;P06493-2;E5RIU6	Cyclin-dependent kinase 1
ATP5B	31.7928	31.2016	30.4779	0	323.31	281000000000	403	P06576;H0YH81;F8W079;F8W0P7;H0YI37	P06576;H0YH81;F8W079	ATP synthase subunit beta, mitochondrial;ATP synthase subunit beta
S100A6	20.521	17.5345	23.366	0.0081127	2.0704	54057000	1	P06703;R4GN98	P06703;R4GN98	Protein S100-A6;Protein S100
EIF4E	26.655	26.6806	25.9347	0	24.175	3805500000	38	P06730;P06730-2;D6RBW1;P06730-3;H0Y8J7;D6RFJ3	P06730;P06730-2;D6RBW1;P06730-3;H0Y8J7	Eukaryotic translation initiation factor 4E
ENO1	31.4447	31.6238	31.0464	0	323.31	231000000000	306	P06733;P06733-2;K7EM90	P06733;P06733-2;K7EM90	Alpha-enolase;Enolase
PYGL	27.0237	27.0966	25.9162	0	255.58	21652000000	162	P06737;P06737-2;E9PK47	P06737;P06737-2;E9PK47	Glycogen phosphorylase, liver form;Alpha-1,4 glucan phosphorylase
GPI	30.0669	30.066	29.3177	0	323.31	91039000000	180	P06744;P06744-2;K7EQ48;K7EPY4;K7EP41;K7ENA0;K7ERC6;K7ELR7;K7ERK8;K7EIL4;K7ESF4;Q8N196	P06744;P06744-2;K7EQ48	Glucose-6-phosphate isomerase
POLB	23.3745	21.809	20.5072	0	31.605	350180000	8	P06746;E7EW18;H0YAV8;H0YBJ0;H0YBX1;E5RHZ4;E5RIJ0	P06746;E7EW18;H0YAV8;H0YBJ0;H0YBX1	DNA polymerase beta
NPM1	32.276	32.1798	31.5964	0	323.31	201000000000	165	P06748;P06748-2;P06748-3;E5RI98;E5RGW4	P06748;P06748-2;P06748-3	Nucleophosmin
TPM3;DKFZp686J1372	30.2201	30.1336	29.3017	0	135.68	57580000000	120	P06753-2;Q5VU59;P06753-3;P06753-6;P06753-5;Q5VU61;P06753-4;D6R904;D6RFM2	P06753-2;Q5VU59;P06753-3;P06753-6;P06753-5;Q5VU61;P06753-4	Tropomyosin alpha-3 chain
ITGAV	25.9685	25.7463	24.4328	0	177.33	11733000000	111	P06756;P06756-3;P06756-2;H7BZG1	P06756;P06756-3;P06756-2	Integrin alpha-V;Integrin alpha-V heavy chain;Integrin alpha-V light chain
SERPINE2	22.3678	19.7897	20.3206	0	16.292	361290000	11	P07093-2;P07093-3;P07093;C9JN98	P07093-2;P07093-3;P07093	Glia-derived nexin
EPHX1	28.4123	27.2697	26.2418	0	202.33	21242000000	105	P07099;B1AQP9;B1AQP8	P07099	Epoxide hydrolase 1
DBI	27.7505	29.3458	28.8054	0	68.155	7071300000	28	P07108;P07108-5;P07108-3;P07108-2;P07108-4;P07108-6	P07108;P07108-5;P07108-3;P07108-2;P07108-4	Acyl-CoA-binding protein
FABP1	26.9982	28.9427	27.6197	0	37.564	6660400000	17	P07148;A8MW49;Q9NQV6-6	P07148;A8MW49	Fatty acid-binding protein, liver
CENPB	21.3745	20.418	20.3817	0	18.86	252200000	6	P07199	P07199	Major centromere autoantigen B
GPX1	22.0858	22.1208	20.5528	0	9.0783	159650000	4	P07203	P07203	Glutathione peroxidase 1
PROS1	25.1307	24.5207	23.7806	0	46.097	3100400000	23	P07225;G5E9F8;H7BXT0;CON__P07224	P07225;G5E9F8	Vitamin K-dependent protein S
P4HB	31.1949	30.7213	29.9735	0	323.31	235000000000	374	P07237;H7BZ94;F5H8J2;H0Y3Z3;I3L398;I3L312;I3L0S0;I3L4M2;I3NI03;I3L3U6;I3L3P5;I3L514;I3L1Y5	P07237;H7BZ94;F5H8J2;H0Y3Z3	Protein disulfide-isomerase
H1F0	29.5069	28.1938	26.8597	0	27.21	7188700000	30	P07305;P07305-2	P07305;P07305-2	Histone H1.0;Histone H1.0, N-terminally processed
ASGR1	25.5982	24.0729	24.3143	0	21.834	2091800000	22	P07306;P07306-2;K7EPS5;I3L2S9;J3QSZ2;I3L1F8;I3L129	P07306;P07306-2;K7EPS5;I3L2S9;J3QSZ2	Asialoglycoprotein receptor 1
ASGR2	25.5859	24.2638	23.1246	0.000351	4.3982	1331700000	12	P07307;P07307-3;P07307-2	P07307;P07307-3;P07307-2	Asialoglycoprotein receptor 2
CTSD	30.8517	30.2433	29.288	0	201.69	92996000000	165	P07339;C9JH19;H7C469;H7C1V0;F8WD96;F8W787	P07339;C9JH19;H7C469	Cathepsin D;Cathepsin D light chain;Cathepsin D heavy chain
ANXA2;ANXA2P2	30.8318	30.6311	29.6954	0	323.31	124000000000	216	P07355;P07355-2;H0YN42;H0YMD0;H0YMU9;H0YM50;A6NMY6;H0YKS4;H0YN28;H0YL33;H0YMM1;H0YKZ7;H0YLV6;H0YMT9;H0YKX9;H0YKL9;H0YMW4;H0YNA0;H0YKV8;H0YMD9;H0YNB8;H0YN52;H0YKN4;H0YLE2	P07355;P07355-2;H0YN42;H0YMD0;H0YMU9;H0YM50;A6NMY6;H0YKS4	Annexin A2;Annexin;Putative annexin A2-like protein
CAPN1	25.4118	25.754	24.7148	0	84.55	6150600000	63	P07384;E9PLX0;E9PJJ3;E9PLC9;E9PMC6;E9PJA6;E9PSA6;E9PQB3;E9PRM1;E9PIA9;E9PL37	P07384	Calpain-1 catalytic subunit
TUBB	29.9403	30.0985	29.2622	0	111.3	70716000000	79	P07437;Q5JP53;Q5ST81;A0A075B736;Q5SQY0;I3L2F9;A6NNZ2	P07437;Q5JP53;Q5ST81	Tubulin beta chain
HEXB	25.7339	25.4306	24.3385	0	81.479	4271800000	41	P07686;Q5URX0;H0YA83;H0Y9B6;D6REQ8	P07686;Q5URX0	Beta-hexosaminidase subunit beta;Beta-hexosaminidase subunit beta chain B;Beta-hexosaminidase subunit beta chain A
CTSL	25.6367	24.6003	24.1004	0	21.59	1253800000	17	P07711;Q5T8F0	P07711	Cathepsin L1;Cathepsin L1 heavy chain;Cathepsin L1 light chain
PFN1	31.2597	31.3638	30.667	0	127.46	81025000000	112	P07737;K7EJ44;CON__P02584;I3L3D5	P07737;K7EJ44	Profilin-1
APRT	26.1698	26.4494	25.5208	0	73.878	2827000000	22	P07741;P07741-2;H3BQF1;H3BQZ9;H3BQB1;H3BSW3	P07741;P07741-2;H3BQF1;H3BQZ9;H3BQB1;H3BSW3	Adenine phosphoribosyltransferase
EPRS	27.6981	27.6433	26.597	0	323.31	56521000000	286	P07814;V9GYZ6;V9GZ76	P07814;V9GYZ6	Bifunctional glutamate/proline--tRNA ligase;Glutamate--tRNA ligase;Proline--tRNA ligase
CTSB	27.6412	27.944	26.5754	0	206.24	15282000000	40	P07858;R4GMQ5;E9PR54;E9PJ67;E9PCB3;E9PKQ7;E9PNL5;E9PHZ5;E9PLY3;E9PSG5;E9PQM1;E9PS78	P07858	Cathepsin B;Cathepsin B light chain;Cathepsin B heavy chain
HSP90AA1	30.3647	30.4231	29.626	0	323.31	153000000000	305	P07900;P07900-2;G3V2J8;Q14568;Q58FG0;Q58FG1	P07900;P07900-2	Heat shock protein HSP 90-alpha
GALT	22.5149	23.085	22.1106	0	15.097	352440000	11	P07902;G3V4G9;G3V3U5;G3V223;F2Z2X9;P07902-2;H0YJL3	P07902;G3V4G9;G3V3U5;G3V223;F2Z2X9;P07902-2	Galactose-1-phosphate uridylyltransferase
UQCRH	23.2952	23.4697	19.2037	0.0016268	3.0253	131460000	2	P07919	P07919	Cytochrome b-c1 complex subunit 6, mitochondrial
LYN	19.5327	22.4129	19.7509	0	6.7522	275030000	6	P07948;P07948-2;P08631;A8K4G3;H0Y3C5;J3KPD6;P08631-3;P08631-2;P08631-4	P07948;P07948-2	Tyrosine-protein kinase Lyn
	24.5276	24.2102	23.7288	0	36.278	1265700000	18	P07951-2;P07951-3	P07951-2;P07951-3
FH	28.7107	28.382	27.4142	0	203.76	31978000000	118	P07954;P07954-2	P07954;P07954-2	Fumarate hydratase, mitochondrial
ERCC1	20.0421	17.6118	19.7098	0.00051291	3.8739	27119000	2	P07992;P07992-4;P07992-2	P07992;P07992-4;P07992-2	DNA excision repair protein ERCC-1
GJB1	21.7855	21.8429	19.5672	0.00034892	4.2608	173740000	5	P08034	P08034	Gap junction beta-1 protein
SP1	23.7655	22.7396	22.2944	0	21.2	330540000	6	P08047;P08047-3;H3BUU5;P08047-2	P08047;P08047-3;H3BUU5;P08047-2	Transcription factor Sp1
HSPA1A	28.4769	28.3912	27.4205	0	282.36	37221000000	168	P08107;P08107-2;V9GZ37	P08107;P08107-2;V9GZ37	Heat shock 70 kDa protein 1A
ANXA6	27.9882	27.8439	27.3217	0	269.81	33652000000	183	P08133;P08133-2;E5RK69;E7EMC6;E5RJF5;E5RK63;E5RFF0;E5RI05;E5RJR0;E5RIU8;H0YC77	P08133;P08133-2;E5RK69;E7EMC6	Annexin A6;Annexin
RHOC	23.3741	23.5541	21.9387	0	13.342	295990000	5	P08134;Q5JR08;E9PQH6;Q5JR07;Q5JR05;E9PLA2;Q5JR06;E9PN11	P08134;Q5JR08;E9PQH6;Q5JR07;Q5JR05;E9PLA2;Q5JR06;E9PN11	Rho-related GTP-binding protein RhoC
ABCB1	23.9879	22.8067	22.6977	0	102.06	3537400000	41	P08183;P08183-2;P21439;P21439-3;P21439-2;H7C0M2	P08183;P08183-2	Multidrug resistance protein 1
GUSB	26.5061	25.6832	24.9428	0	76.54	6232800000	51	P08236;P08236-3;P08236-2;F8WBK6;F2Z3L6	P08236;P08236-3;P08236-2	Beta-glucuronidase
PFKM	23.5401	23.8529	23.2385	0	37.272	1442400000	24	P08237;P08237-3;P08237-2;F8VX13;F8VNX2;F8VZQ1;F8W1J8;F8VSF7;F8VW30;F8VSL1;F8VUB8;F8VYK8;F8VTQ3;F8VZI0;F8VP00;F8VVE3	P08237;P08237-3;P08237-2	ATP-dependent 6-phosphofructokinase, muscle type
HSP90AB1	31.4935	31.477	30.8542	0	323.31	332000000000	463	P08238;Q58FF7;Q5T9W8	P08238	Heat shock protein HSP 90-beta
SRPR	27.2084	26.341	25.732	0	113.75	13722000000	104	P08240;P08240-2	P08240;P08240-2	Signal recognition particle receptor subunit alpha
ASNS	25.5186	26.1188	24.735	0	88.357	5214400000	55	P08243;P08243-2;P08243-3;F8WEJ5;C9J057;C9JT45;C9JM09;C9JLN6	P08243;P08243-2;P08243-3;F8WEJ5	Asparagine synthetase [glutamine-hydrolyzing]
GSTA2;GSTA1	18.9939	21.085	20.9599	0.0047037	2.4149	59317000	1	P09210;P08263	P09210;P08263	Glutathione S-transferase A2;Glutathione S-transferase A1;Glutathione S-transferase A1, N-terminally processed
PDHA1	27.4819	26.971	26.2742	0	116.77	10919000000	74	P08559;P08559-2;P08559-4;P08559-3;Q5JPU3;Q5JPT9;Q5JPU0;Q5JPU1;P29803;Q5JPU2	P08559;P08559-2;P08559-4;P08559-3	Pyruvate dehydrogenase E1 component subunit alpha, somatic form, mitochondrial
CD14	22.0976	21.1111	19.8225	0.00018198	5.1871	160010000	2	P08571;D6RFL4	P08571;D6RFL4	Monocyte differentiation antigen CD14;Monocyte differentiation antigen CD14, urinary form;Monocyte differentiation antigen CD14, membrane-bound form
CYC1	27.1988	26.7816	26.1196	0	115.09	7664200000	58	P08574	P08574	Cytochrome c1, heme protein, mitochondrial
SNRPB2	27.8869	27.2149	25.8001	0	28.898	5881000000	31	P08579	P08579	U2 small nuclear ribonucleoprotein B
MET	22.799	22.0051	20.9578	0	40.905	1224000000	17	P08581;P08581-2;P08581-3;H7C130;H7C174	P08581;P08581-2	Hepatocyte growth factor receptor
CFH	18.5873	17.872	17.1646	0.0034838	2.5893	47620000	2	P08603;P08603-2;Q5TFM2	P08603;P08603-2;Q5TFM2	Complement factor H
SNRNP70	28.8975	28.6784	27.4481	0	71.168	24708000000	91	P08621;P08621-2;P08621-3;P08621-4;M0QYR1;M0QX04	P08621;P08621-2;P08621-3	U1 small nuclear ribonucleoprotein 70 kDa
ITGA5	26.1207	25.7274	24.3213	0	143.5	7602100000	57	P08648;H0YIV7	P08648	Integrin alpha-5;Integrin alpha-5 heavy chain;Integrin alpha-5 light chain
NFIC	20.4371	20.668	17.8274	0	34.482	97596000	2	P08651;P08651-4;P08651-5;P08651-3;P08651-6;P08651-2	P08651;P08651-4;P08651-5;P08651-3;P08651-6;P08651-2	Nuclear factor 1 C-type
VIM	26.9094	26.4844	26.3734	0	193.08	17931000000	102	P08670;B0YJC4;B0YJC5;Q5JVS8;P41219;H7C5W5;P41219-2;Q16352;P07197-2;P12036;P07196;F8W835;P12036-2	P08670;B0YJC4	Vimentin
SERPINF2	22.3206	21.9405	19.865	0	12.544	272480000	8	P08697;C9JMH6;P08697-2;C9JPV4	P08697;C9JMH6;P08697-2;C9JPV4	Alpha-2-antiplasmin
RPS17;RPS17L	31.1541	30.966	30.1493	0	187.07	37025000000	74	P08708;P0CW22;H0YN88;A0A075B716;H0YN73;H3BNC9	P08708;P0CW22;H0YN88;A0A075B716	40S ribosomal protein S17;40S ribosomal protein S17-like
GNAI3	25.1893	25.3726	23.7717	0	30.141	1826800000	21	P08754	P08754	Guanine nucleotide-binding protein G(k) subunit alpha
ANXA5	29.2385	29.7811	29.0152	0	323.31	50440000000	130	P08758;D6RBL5;D6RBE9;E9PHT9;D6RCN3	P08758;D6RBL5;D6RBE9;E9PHT9	Annexin A5;Annexin
SNRPA	28.4749	28.3184	27.4152	0	137.6	14135000000	68	P09012;M0R268;M0QZG7;M0QXK2;M0R221;M0R2B8;M0R0G9	P09012;M0R268;M0QZG7;M0QXK2;M0R221;M0R2B8	U1 small nuclear ribonucleoprotein A
ACAA1	29.5832	28.7814	27.6553	0	158.44	36717000000	108	P09110;C9JDE9;H7C131;P09110-2;H0Y4D4;B4DVF4;F2Z2Q6;F2Z3P7	P09110;C9JDE9;H7C131;P09110-2	3-ketoacyl-CoA thiolase, peroxisomal
SRP19	25.3895	25.4443	24.4368	0	11.978	979870000	12	P09132	P09132	Signal recognition particle 19 kDa protein
GSTP1	30.245	31.1652	30.3779	0	323.31	62742000000	152	P09211;A8MX94	P09211;A8MX94	Glutathione S-transferase P
SNRPC	26.5533	26.9348	22.865	0	10.118	1861000000	4	P09234;Q5TAL2	P09234;Q5TAL2	U1 small nuclear ribonucleoprotein C
VIL1	28.59	28.5803	27.7173	0	323.31	62774000000	211	P09327;B4DV78;P09327-2;H7C0B6;C9J2B5;O75366;O75366-2	P09327;B4DV78	Villin-1
QDPR	27.1679	26.7854	25.9284	0	88.377	5454500000	41	P09417;P09417-2;B7Z415;D6RGG7;D6RHJ7;H0Y8F7	P09417;P09417-2	Dihydropteridine reductase
HMGB1;HMGB1P1	31.6329	31.741	30.4977	0	172.2	65870000000	121	P09429;Q5T7C4;Q5T7C6;B2RPK0	P09429;Q5T7C4;Q5T7C6;B2RPK0	High mobility group protein B1;Putative high mobility group protein B1-like 1
FBP1	23.6626	23.7917	22.6196	0	20.277	973170000	13	P09467;Q5VZC3	P09467	Fructose-1,6-bisphosphatase 1
GSTM1	24.7812	25.6662	24.7109	0	31.155	1799400000	17	P09488;P09488-2;E7EWW9;B9ZVX7	P09488;P09488-2;E7EWW9;B9ZVX7	Glutathione S-transferase Mu 1
TPM1	25.7558	26.0353	24.1649	0	40.201	3198400000	28	P09493-3;P09493-10;Q6ZN40;P09493-9;P09493-4;P09493-8;P09493;H0YKX5;H0YL52;P09493-7;P09493-6;H0YKP3;H0YK20;H0YLS7;H0YKZ6	P09493-3;P09493-10;Q6ZN40;P09493-9;P09493-4;P09493-8;P09493;H0YKX5;H0YL52;P09493-7;P09493-6;H0YKP3	Tropomyosin alpha-1 chain
CLTA	27.948	27.4379	26.7375	0	15.828	4495000000	19	P09496-2;P09496;P09496-4;P09496-3;F8WF69;P09496-5;C9J8P9	P09496-2;P09496;P09496-4;P09496-3;F8WF69	Clathrin light chain A
CLTB	27.6462	27.0169	26.0276	0	14.107	5295500000	25	P09497-2;P09497;D6RJD1;H0Y9Q6	P09497-2;P09497	Clathrin light chain B
ANXA4	27.2509	27.8123	27.0778	0	190.95	14972000000	99	P09525;Q6P452;P09525-2	P09525;Q6P452;P09525-2	Annexin A4;Annexin
CNP	24.9019	24.1704	23.5971	0	69.081	2070000000	25	P09543;P09543-2;K7ERC4;K7EN66;C9K0L8;K7ERZ0	P09543;P09543-2	2,3-cyclic-nucleotide 3-phosphodiesterase
HMOX1	21.8958	22.8805	21.9208	0	17.782	218320000	7	P09601;B1AHA8	P09601;B1AHA8	Heme oxygenase 1
[truncated: 4,509 more rows]
